# Supplementary material
Source: PubMed Central journal article supplement (PMC3696959)
Supplement: NIHMS473857-supplement-Supplementary_Data.pdf [file NIHMS473857-supplement-Supplementary_Data.pdf]

## Identification of heart rate-associated loci and their effects on cardiac conduction and rhythm disorders

---

### SUPPLEMENTARY INFORMATION

---

M den Hoed, M Eijgelsheim, T Esko, BJJM Brundel, DS Peal, DM Evans, IM Nolte, AV Segrè, H Holm, RE Handsaker, H-J Westra, T Johnson, A Isaacs, J Yang, A Lundby, JH Zhao, YJ Kim, MJ Go, P Almgren, M Bochud, G Boucher, MC Cornelis, D Gudbjartsson, D Hadley, P van der Harst, C Hayward, M den Heijer, W Igl, AU Jackson, Z Kutalik, J Luan, JP Kemp, K Kristiansson, C Ladenvall, M Lorentzon, ME Montasser, OT Njajou, PF O'Reilly, S Padmanabhan, B St Pourcain, T Rankinen, P Salo, T Tanaka, NJ Timpson, V Vitart, L Waite, W Wheeler, W Zhang, HHM Draisma, MF Feitosa, KF Kerr, PA Lind, E Mihailov, NC Onland-Moret, C Song, MN Weedon, W Xie, L Yengo, D Absher, CM Albert, A Alonso, DE Arking, PIW de Bakker, B Balkau, C Barlassina, P Benaglio, JC Bis, N Bouatia-Naji, S Brage, SJ Chanock, PS Chines, M Chung, D Darbar, C Dina, M Dörr, P Elliott, SB Felix, K Fischer, C Fuchsberger, EJC de Geus, P Goyette, V Gudnason, TB Harris, A-L Hartikainen, AS Havulinna, SR Heckbert, AA Hicks, A Hofman, S Holewijn, F Hoogstra-Berends, J-J Hottenga, M K Jensen, Å Johansson, J Juntila, S Kääb, B Kanon, S Ketkar, K-T Khaw, JW Knowles, AS Kooner, J A Kors, M Kumari, L Milani, P Laiho, EG Lakatta, C Langenberg, M Leusink, Y Liu, RN Luben, KL Lunetta, SN Lynch, MRP Markus, P Marques-Vidal, T Mateo Leach, WL McArdle, SA McCarroll, SE Medland, KA Miller, GW Montgomery, AC Morrison, M Müller-Nurasyid, P Navarro, M Nelis, JR O'Connell, CJ O'Donnell, KK Ong, AB Newman, A Peters, O Polasek, A Pouta, PP Pramstaller, BM Psaty, DC Rao, SM Ring, EJ Rossin, D Rudan, S Sanna, RA Scott, JS Sehmi, S Sharp, JT Shin, AB Singleton, AV Smith, N Soranzo, TD Spector, C Stewart, HM Stringham, KV Tarasov, AG Uitterlinden, L Vandenput, S-J Hwang, JB Whitfield, C Wijmenga, SH Wild, G Willemsen, JF Wilson, JCM Witteman, A Wong, Q Wong, Y Jamshidi, P Zitting, JMA Boer, DI Boomsma, IB Borecki, CM van Duijn, U Ekelund, NG Forouhi, P Froguel, A

Hingorani, E Ingelsson, M Kivimaki, RA Kronmal, D Kuh, L Lind, NG Martin, BA Oostra, NL Pedersen, T Quertermous, JI Rotter, YT van der Schouw, WMM Verschuren, M Walker, D Albanes, DO Arnar, TL Assimes, S Bandinelli, M Boehnke, RA de Boer, C Bouchard, M Caulfield, JC Chambers, G Curhan, D Cusi, J Eriksson, L Ferrucci, WH van Gilst, N Glorioso, J de Graaf, L Groop, U Gyllensten, W-C Hsueh, FB Hu, HV Huikuri, DJ Hunter, C Iribarren, B Isomaa, M-R Jarvelin, A Jula, M Kähönen, LA Kiemeney, MM van der Klauw, JS Kooner, P Kraft, L Iacoviello, T Lehtimäki, M-LL Lokki, BD Mitchell, G Navis, MS Nieminen, C Ohlsson, NR Poulter, L Qi, OT Raitakari, EB Rimm, JD Rioux, F Rizzi, I Rudan, V Salomaa, PS Sever, DC Shields, AR Shuldiner, J Sinisalo, AV Stanton, RP Stolk, DP Strachan, J-C Tardif, U Thorsteinsdottir, J Tuomilehto, DJ van Veldhuisen, J Virtamo, J Viikari, P Vollenweider, G Waeber, E Widen, YS Cho, JV Olsen, PM Visscher, C Willer, L Franke, Global BPgen consortium, CARDIoGRAM consortium, J Erdmann, JR Thompson, PR GWAS consortium, A Pfeufer, QRS GWAS consortium, N Sotoodehnia, QT-IGC consortium, C Newton-Cheh, CHARGE-AF consortium, PT Ellinor, BHCh Stricker, A Metspalu, M Perola, JS Beckmann, G Davey Smith, K Stefansson, NJ Wareham, PB Munroe, OCM Sibon, DJ Milan, H Snieder, NJ Samani and RJF Loos.

**1. SUPPLEMENTARY TABLES AND FIGURES**

- |            |                              |               |
|------------|------------------------------|---------------|
| <b>1.1</b> | <b>Supplementary Figures</b> | <b>p3-13</b>  |
| <b>1.2</b> | <b>Supplementary Tables</b>  | <b>p14-70</b> |

**2. SUPPLEMENTARY NOTE**

- |            |                                                             |               |
|------------|-------------------------------------------------------------|---------------|
| <b>2.1</b> | <b>Candidate genes within the confirmed heart rate loci</b> | <b>p71-78</b> |
| <b>2.2</b> | <b>Acknowledgments</b>                                      | <b>p79-89</b> |
| <b>2.3</b> | <b>Members of contributing consortia</b>                    | <b>p90-92</b> |

## **1. SUPPLEMENTARY FIGURES AND TABLES**

### **1.1 SUPPLEMENTARY FIGURES**

**Supplementary Figure 1** Study design (**p4**)

**Supplementary Figure 2** SNP flow chart (**p5**)

**Supplementary Figure 3** Quantile-quantile plot of SNPs after meta-analysis of stage 1 results (**p6**)

**Supplementary Figure 4** Overview of results from follow-up analyses: associations between heart rate loci combined and related, clinically relevant traits (**p7**)

**Supplementary Figure 5** Regional plots of the 21 heart rate loci with non-synonymous variants and variants in transcription factor binding sites (**p8-11**)

**Supplementary Figure 6** Flow chart for selection procedure of *Drosophila melanogaster* and *Danio rerio* orthologs of positional candidate genes for heart rate (**p12**)

**Supplementary Figure 7** Visible phenotypes in *Danio rerio* with down-regulated expression of orthologs of positional candidate genes (**p13**)

# STAGE 1

GWAS meta-analysis of heart rate

# STAGE 2

Follow-up of the most significant loci in additional samples

# Follow-up analyses and experiments

For the 21 confirmed heart rate loci

Meta-analysis of GWAS analyses of ~2.55 M imputed and genotyped SNPs with heart rate in 92,355 individuals from 36 studies

**white European ancestry**  
(N = 85,787 from 35 studies)

**Indian Asian ancestry**  
(N = 6,568 from 1 study)

Association analyses of 42 loci (*in silico* replication) with heart rate in up to 88,823 individuals from 37 studies

**GWAS data**  
(N up to 60,396 from 27 studies)

**Metabochip data**  
(N up to 24,334 from 11 studies)

**Cardiochip data**  
(N up to 5,171 from 1 study)

- Analyses of combined effect using a genetic predisposition score
- Associations with cardiac conduction and rhythm disorders
- Associations with cardiovascular intermediates and endpoints
- Pathway analyses
- Proteomics experiments and genetic enrichment analyses in mouse heart
- eQTL analyses in blood
- CNV and functional variants analyses
- Automated literature search
- Downregulation of positional candidate genes in *Drosophila melanogaster* and *Danio rerio*

42 loci ( $p < 3 \times 10^{-5}$ ) taken forward to stage 2

7 previous heart rate loci

|             |                  |
|-------------|------------------|
| <b>MYH6</b> | <b>FADS1</b>     |
| <b>GJA1</b> | <b>SLC35F1</b>   |
| <b>ACHE</b> | <b>LINC00477</b> |
| <b>CD46</b> |                  |

|                 |          |
|-----------------|----------|
| <b>KIAA1755</b> | CPNE5    |
| <b>CCDC141</b>  | ACTN4    |
| <b>SYT10</b>    | SLC10A7  |
| <b>HCN4</b>     | DCP1A    |
| GNB4            | CMYA5    |
| <b>FLRT2</b>    | UHRF1BP1 |
| CHRM2           | KFL14    |
| NKX2-5          | DNAJC19  |
| GNG11           | TCF21    |
| B3GNT7          | HSD17B12 |
| FNDC3B          | NPBWR2   |
| RFX4            | MANEA    |
| CPNE8           | FAM19A2  |
| TFPI            | ST6GAL2  |
| A2BP1           | FRMPD1   |
| MYOT            | CLCNKA   |
| PDE11A          | CDH22    |
| PPP1CC          |          |

**Stage 1 + stage 2 meta-analyses of 42 loci**  
( $N_{\max} = 181,171$ )

21 loci ( $p < 5 \times 10^{-8}$ ) confirmed (in bold)

7 previous heart rate loci

|             |                  |
|-------------|------------------|
| <b>MYH6</b> | <b>FADS1</b>     |
| <b>GJA1</b> | <b>SLC35F1</b>   |
| <b>ACHE</b> | <b>LINC00477</b> |
| <b>CD46</b> |                  |

14 novel heart rate loci

|                 |               |
|-----------------|---------------|
| <b>KIAA1755</b> | <b>NKX2-5</b> |
| <b>CCDC141</b>  | <b>GNG11</b>  |
| <b>SYT10</b>    | <b>B3GNT7</b> |
| <b>HCN4</b>     | <b>FNDC3B</b> |
| <b>GNB4</b>     | <b>RFX4</b>   |
| <b>FLRT2</b>    | <b>CPNE8</b>  |
| <b>CHRM2</b>    | <b>TFPI</b>   |

## Supplementary Figure 1 – Study Design

The blue box shows loci that were previously identified in GWAS for heart rate. Loci reaching  $p < 5 \times 10^{-8}$  are highlighted in bold.

STAGE 1

N SNPs included in meta-analysis 2,516,789

↓ *Meta-analysis of stage 1 results*

N SNPs reaching  $p < 3 \times 10^{-5}$  after meta-analysis 1,249

↓ *Selection of SNPs for follow-up*

N lead SNPs representing independent loci reaching  $p < 3 \times 10^{-5}$  that were taken forward for follow-up 42

↓ *Meta-analysis of stage 1 + 2 results*

STAGE 1 + 2

N lead SNPs reaching  $p < 5 \times 10^{-8}$  after combined meta-analysis of stage 1 + 2 results 21

**Supplementary Figure 2 – SNP Flow chart**

The blue boxes show the number of SNPs that were of interest in each stage of the study.

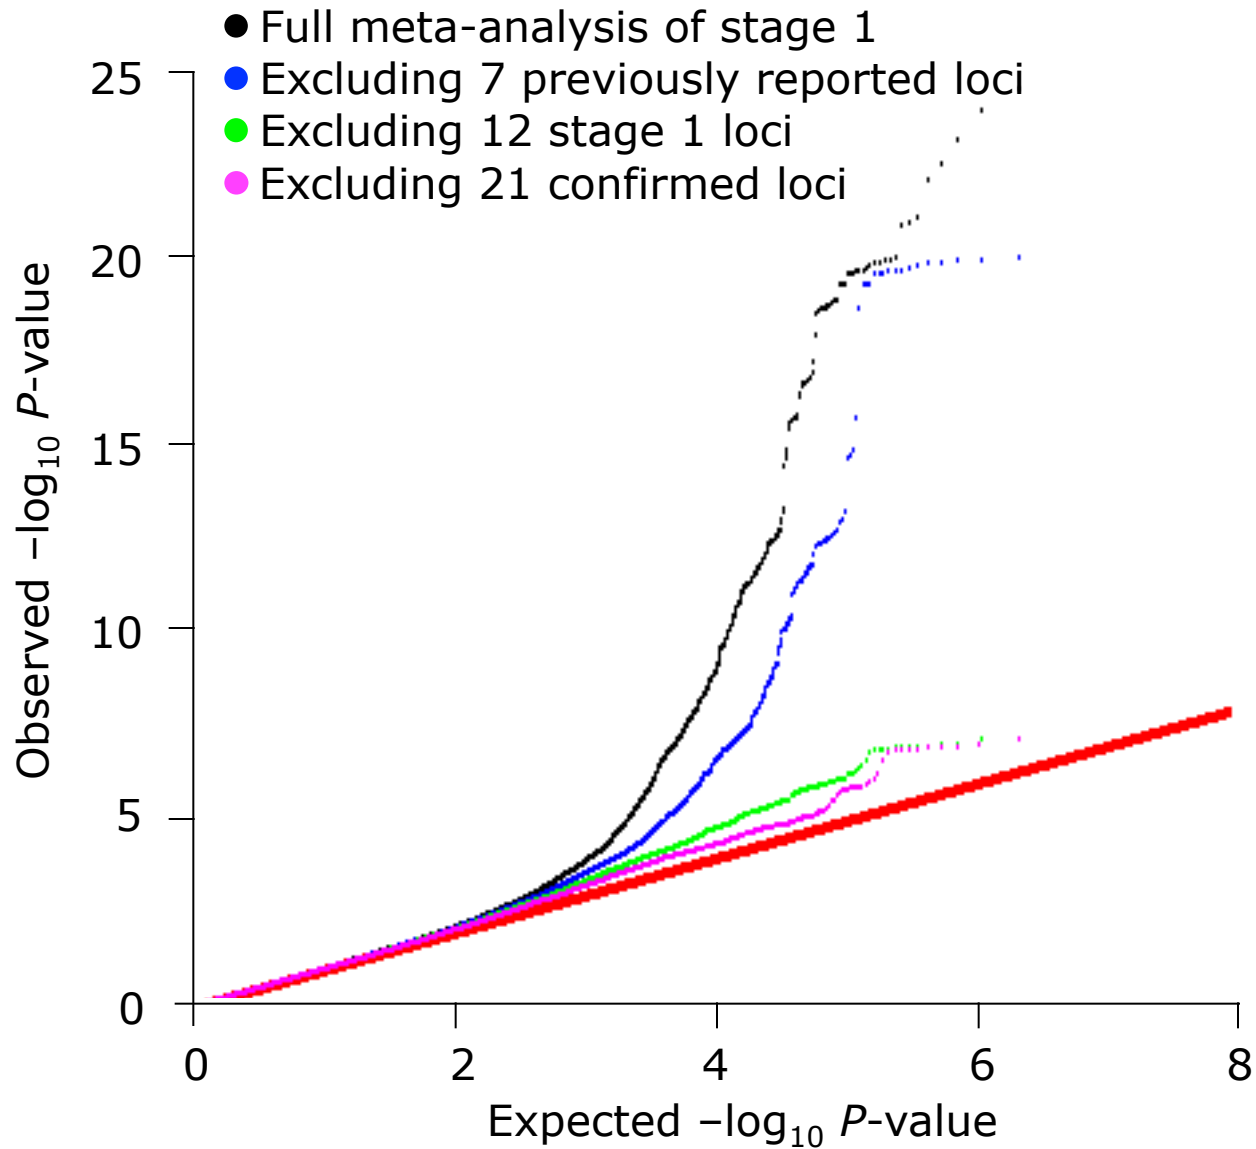

**Supplementary Figure 3 – Quantile-quantile plot of SNPs after meta-analysis of stage 1 results**

Data is shown for the full stage 1 meta-analysis (black), and after excluding SNPs within  $\pm 1$  MB of previously reported genome wide significant loci for heart rate (blue), after additionally excluding the 12 loci that reached  $p < 5 \times 10^{-8}$  in stage 1 (green), and after excluding all SNPs located within 1 MB of the 21 heart rate-associated SNPs (pink).

| Trait                    | N <sub>max</sub>                | p-value               | Association confirmed | Direction |
|--------------------------|---------------------------------|-----------------------|-----------------------|-----------|
| PR duration              | 28,482                          | 1.3x10 <sup>-4</sup>  | yes                   | increased |
| QRS duration             | 40,090                          | 1.8x10 <sup>-5</sup>  |                       | decreased |
| QT duration              | 74,932                          | 1.1x10 <sup>-17</sup> |                       | decreased |
| Atrial Fibrillation      | 9,183 cases<br>91,625 controls  | 0.11                  | no                    |           |
| Atrioventricular Block   | 319 cases<br>41,356 controls    | 0.15                  | no                    |           |
| Sick Sinus Syndrome      | 903 cases<br>40,722 controls    | 2.3x10 <sup>-4</sup>  | yes                   | decreased |
| Pacemaker Implantation   | 978 cases<br>40,976 controls    | 3.6x10 <sup>-4</sup>  | yes                   | decreased |
| Sudden Cardiac Death     | 370 cases<br>41,305 controls    | 0.91                  | no                    |           |
| Diastolic Blood Pressure | 34,210                          | 6.7x10 <sup>-3</sup>  | no                    |           |
| Systolic Blood Pressure  | 34,211                          | 0.33                  |                       |           |
| Hypertension             | 9,777 cases<br>10,101 controls  | 0.87                  |                       |           |
| Coronary Artery Disease  | 21,928 cases<br>62,260 controls | 0.45                  | no                    |           |
| Myocardial Infarction    | 12,584 cases<br>41,163 controls | 0.24                  |                       |           |

**Supplementary Figure 4 – Overview of results from follow-up analyses: associations between heart rate loci combined and related, clinically relevant traits**

For each trait for which associations between the heart rate loci and clinically relevant traits were examined, the effective number of available participants (N for locus with maximal sample size) and p-value for association of the heart rate loci combined and the trait of interest are provided. Associations were considered confirmed when  $p < 2 \times 10^{-3}$ .

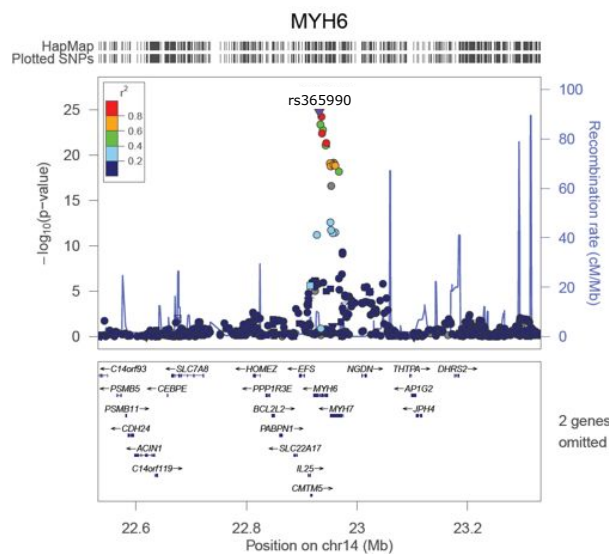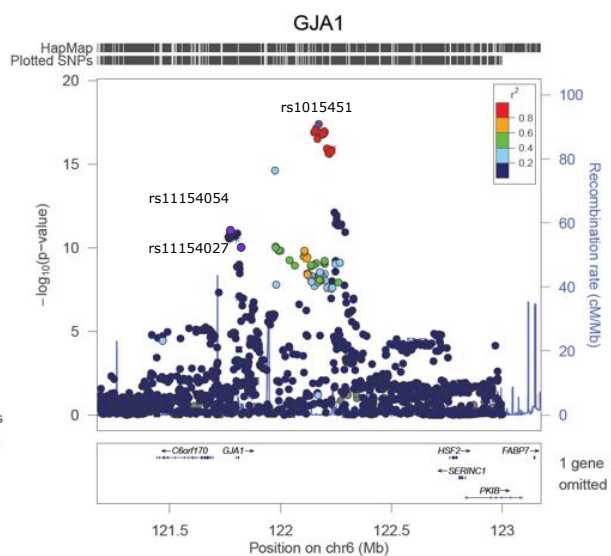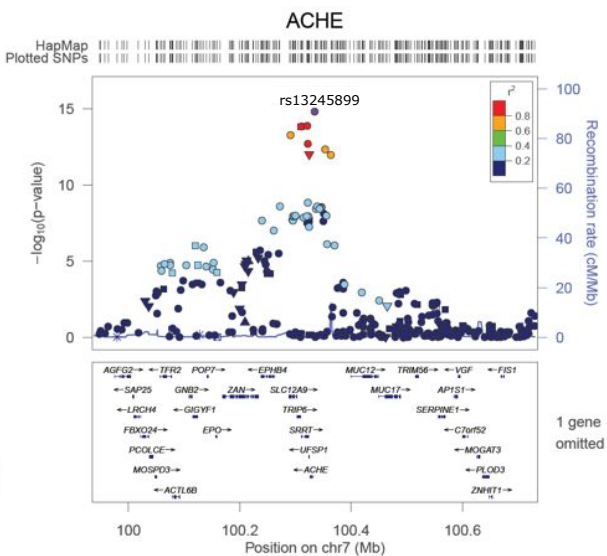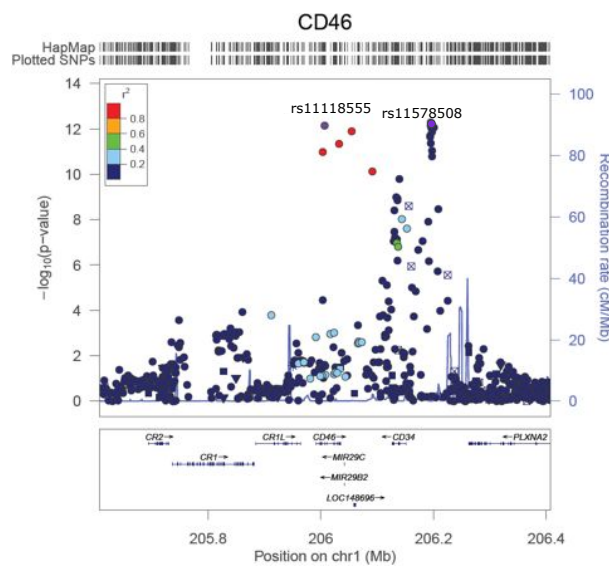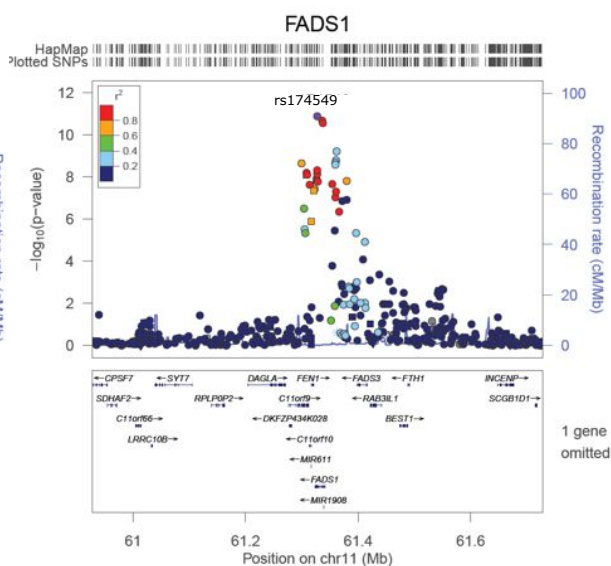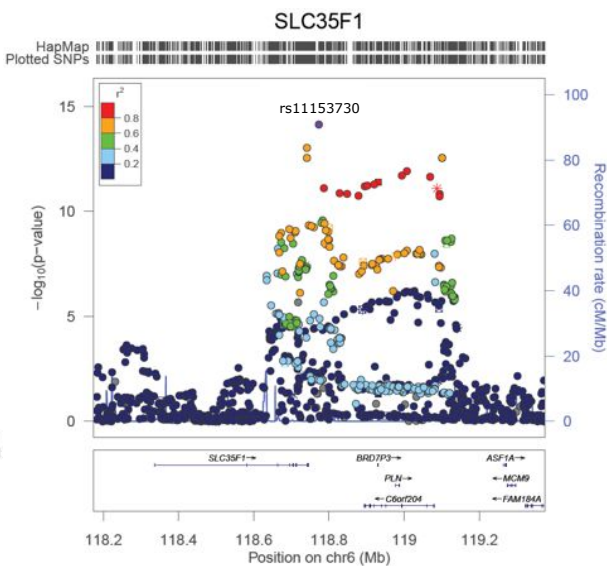



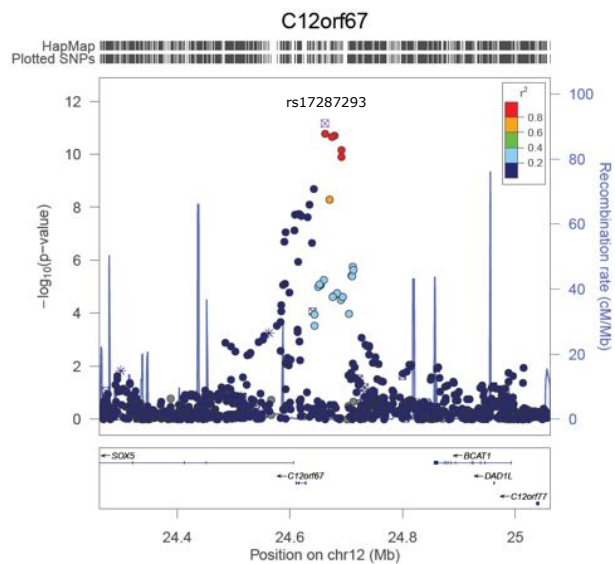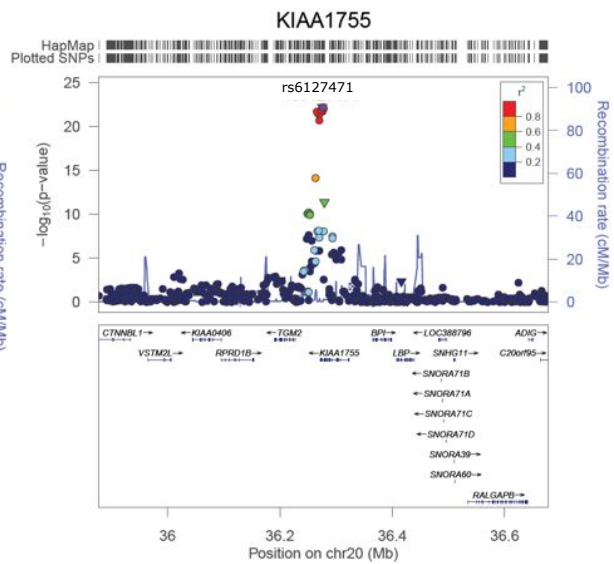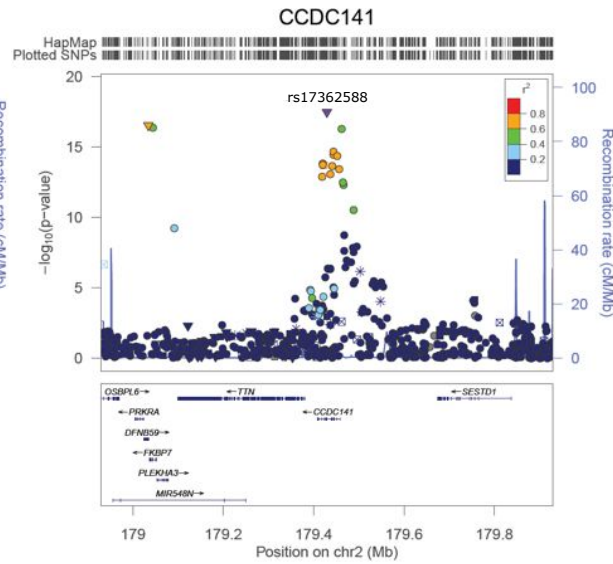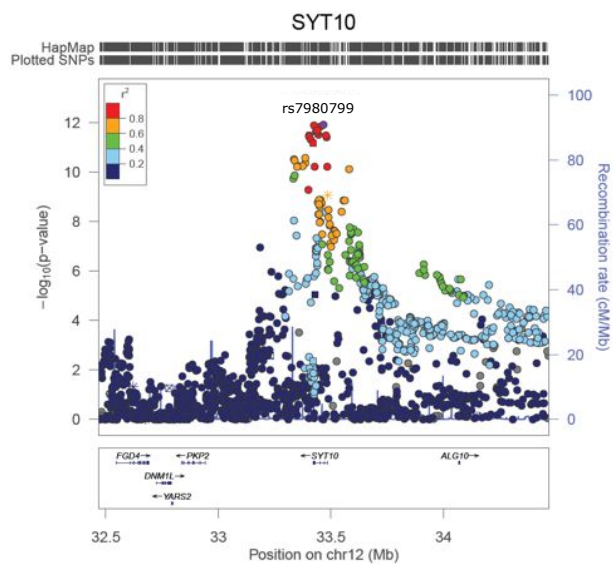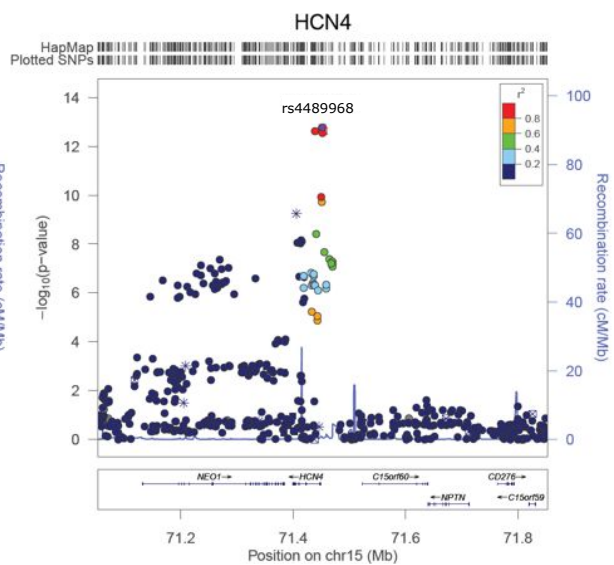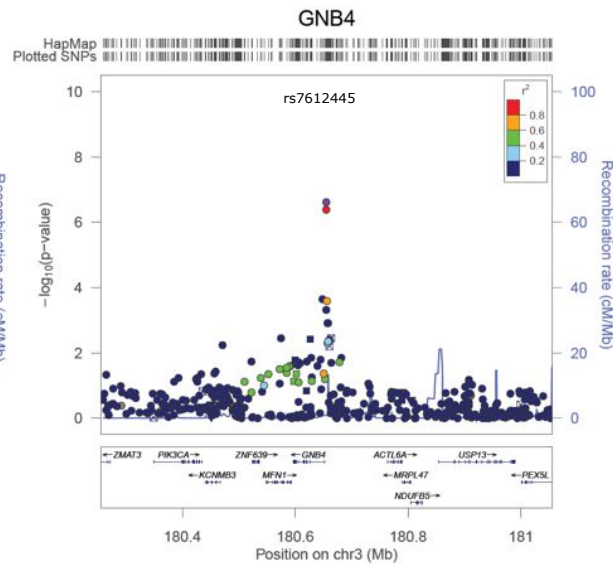

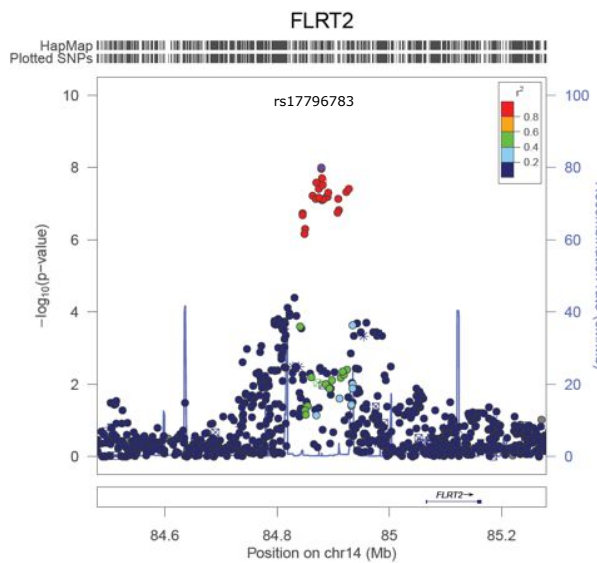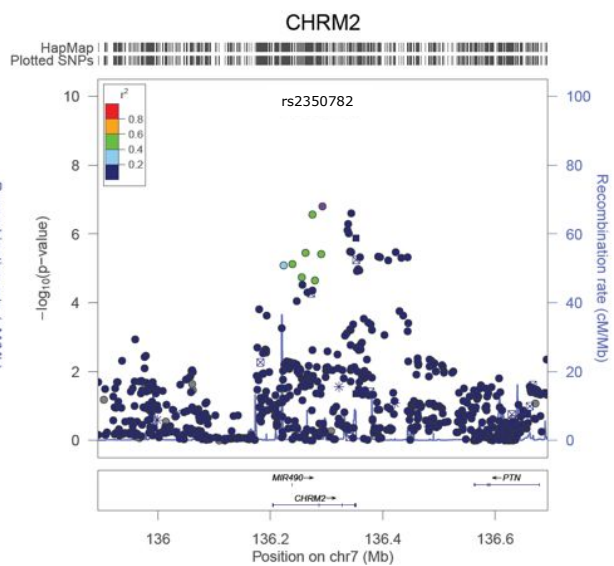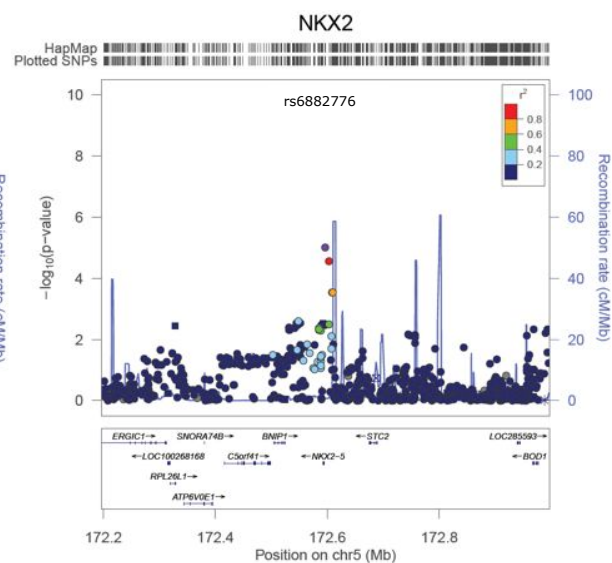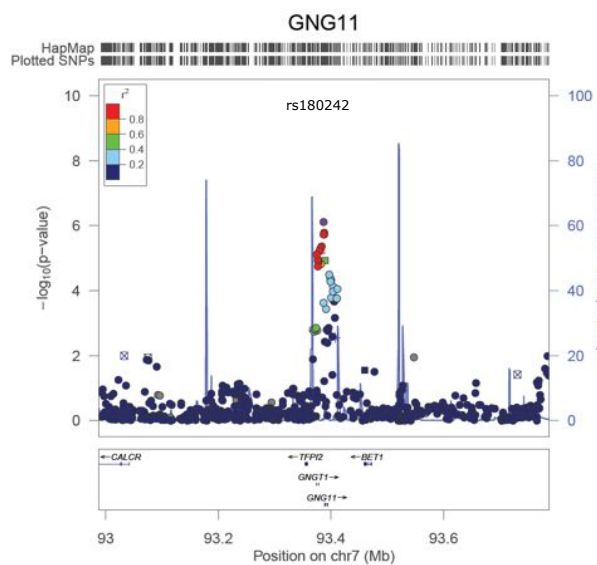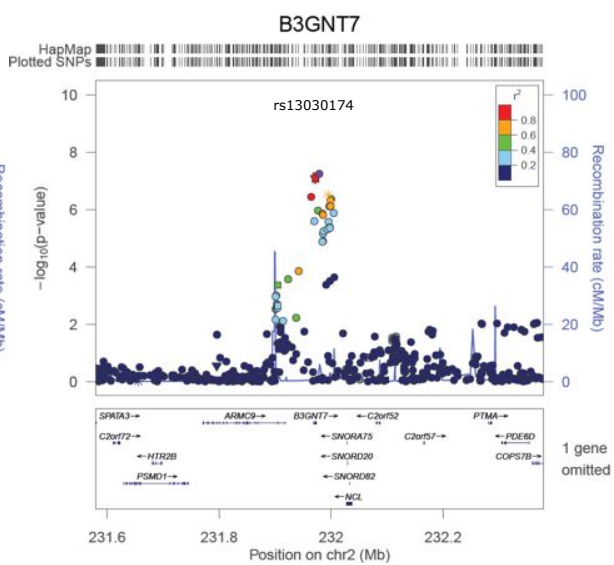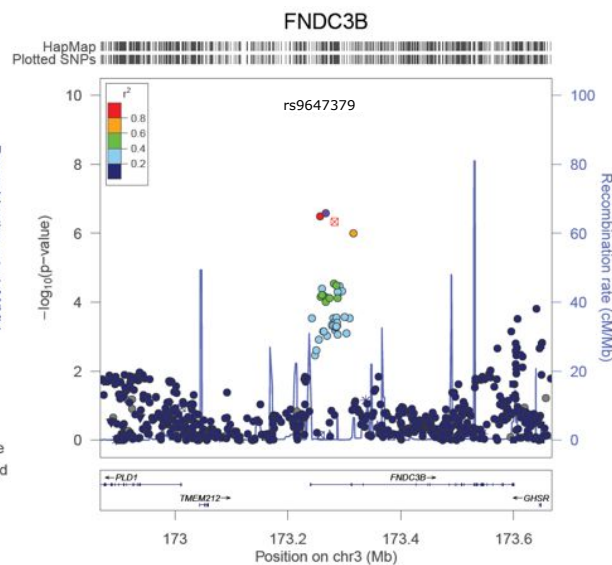

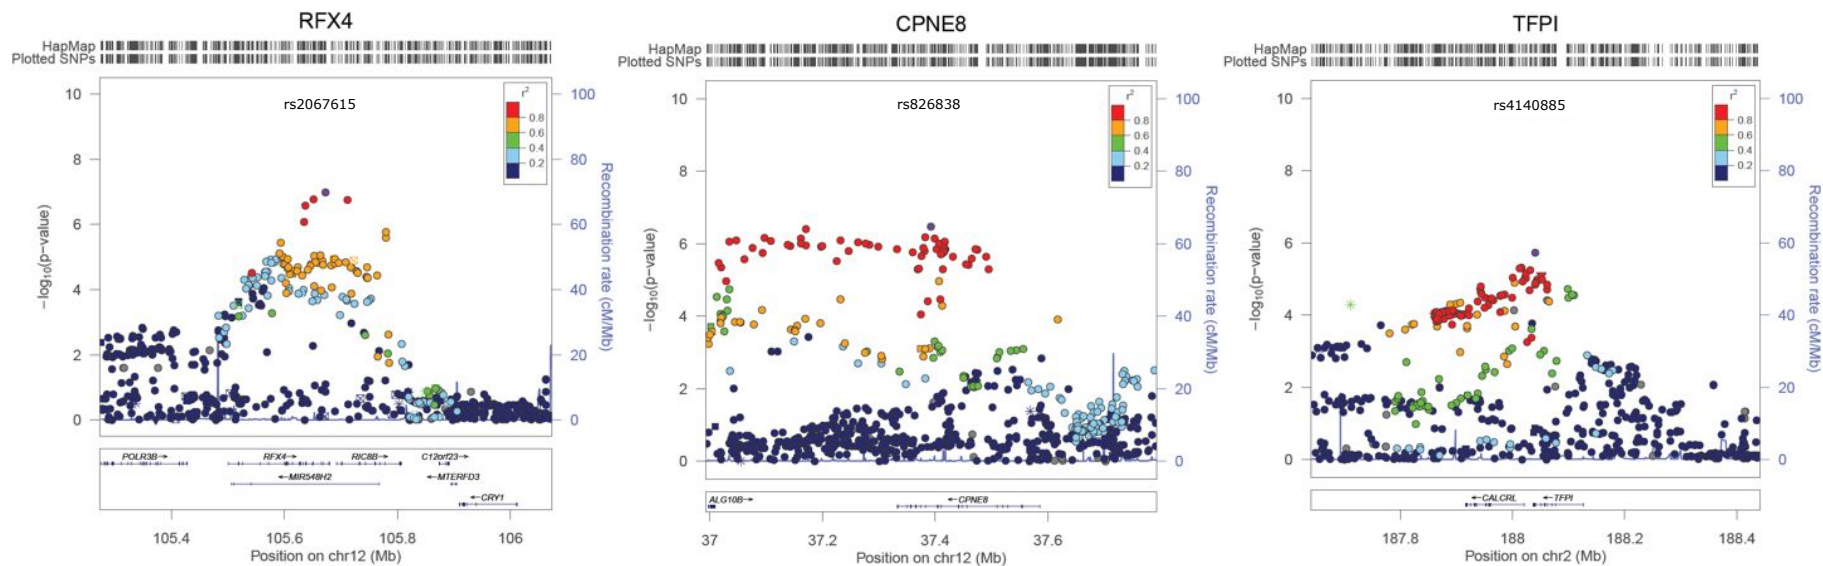

### Supplementary Figure 5 – Regional plots of the 21 confirmed heart rate loci with non-synonymous variants and variants representing transcription factor binding sites

For each of the 21 confirmed heart rate loci, the  $-\log_{10}$  of the p-value for association with heart rate is shown for all SNPs in the region, plotted by position on the chromosome. The seven previously identified loci are shown first (ordered by p-value after combined meta-analysis of stage 1 and 2 results), followed by the 14 novel loci (ordered by p-value). The lead SNP after meta-analysis of stage 1 is shown in purple and its rs-number is provided. For the *GJA1* and *CD46* loci the secondary SNPs identified by conditional analyses are shown in purple as well. Estimated recombination rates (from HapMap) are provided in cyan and reflect the local LD structure. The SNPs surrounding the most significant association are color-coded to reflect their LD with the lead SNP (taken from pairwise  $r^2$  values from the HapMap CEU database). SNPs are functionally annotated as framestop or splice (triangle), nonsynonymous (inverted triangle), coding synonymous or UTR (square), TFBScons (star), MCS44placenta (square with diagonal cross) and none of the above (circle). Genes, positions of exons and direction of transcription are provided (taken from UCSC genome browser, genome.ucsc.edu). Hash marks represent SNP positions available in the meta-analysis. Plots were generated using LocusZoom (Pruim et al, 2010 [PMID 20634204]).

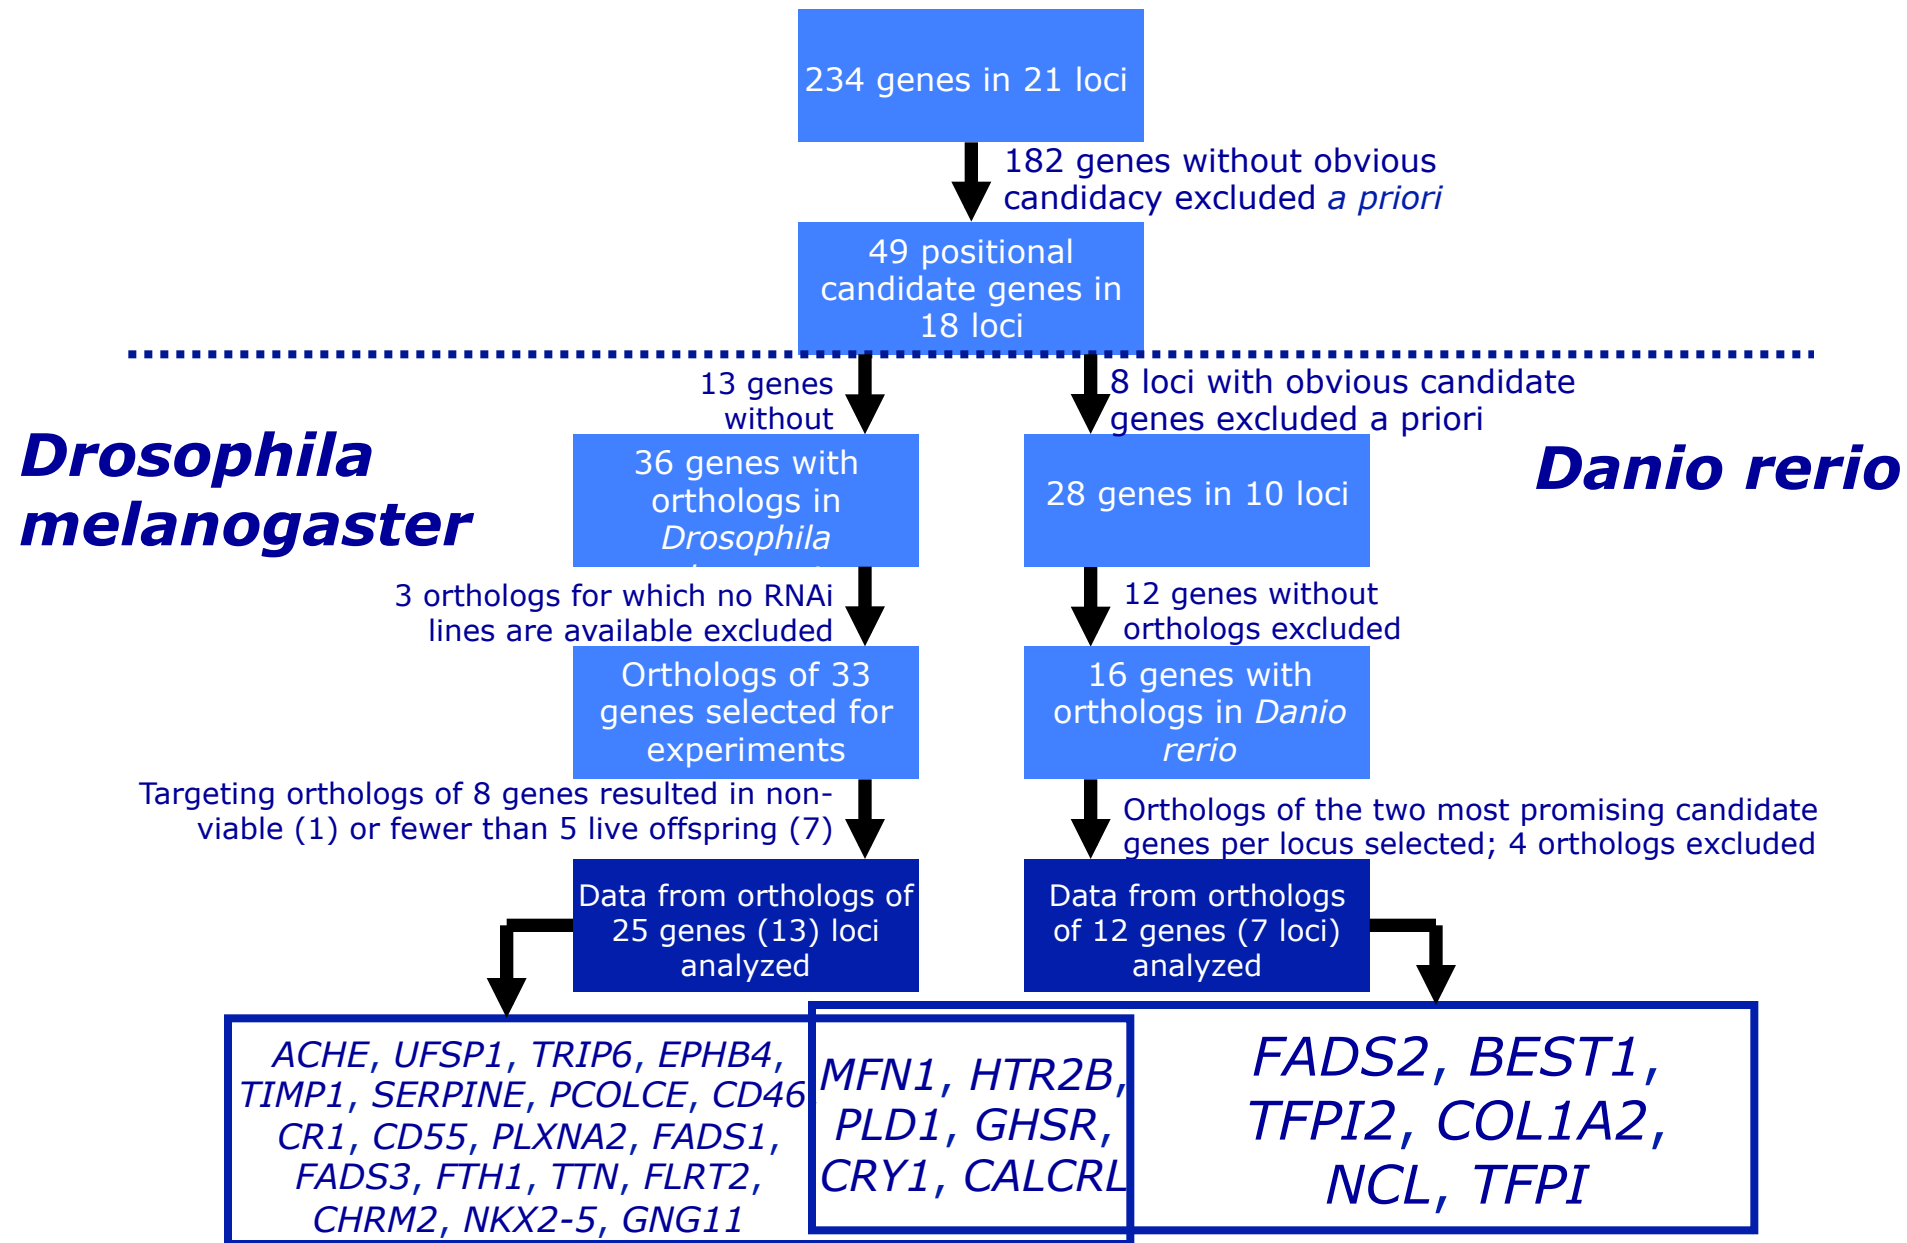

**Supplementary Figure 6 – Flow chart for selection procedure for *Drosophila melanogaster* and *Danio rerio* orthologs of positional candidate genes for heart rate**

The flow chart and Venn diagram illustrate the stepwise manner in which 49 positional candidate genes were reduced to orthologs of 25 genes in *Drosophila melanogaster* and 12 genes in *Danio rerio* (zebrafish).

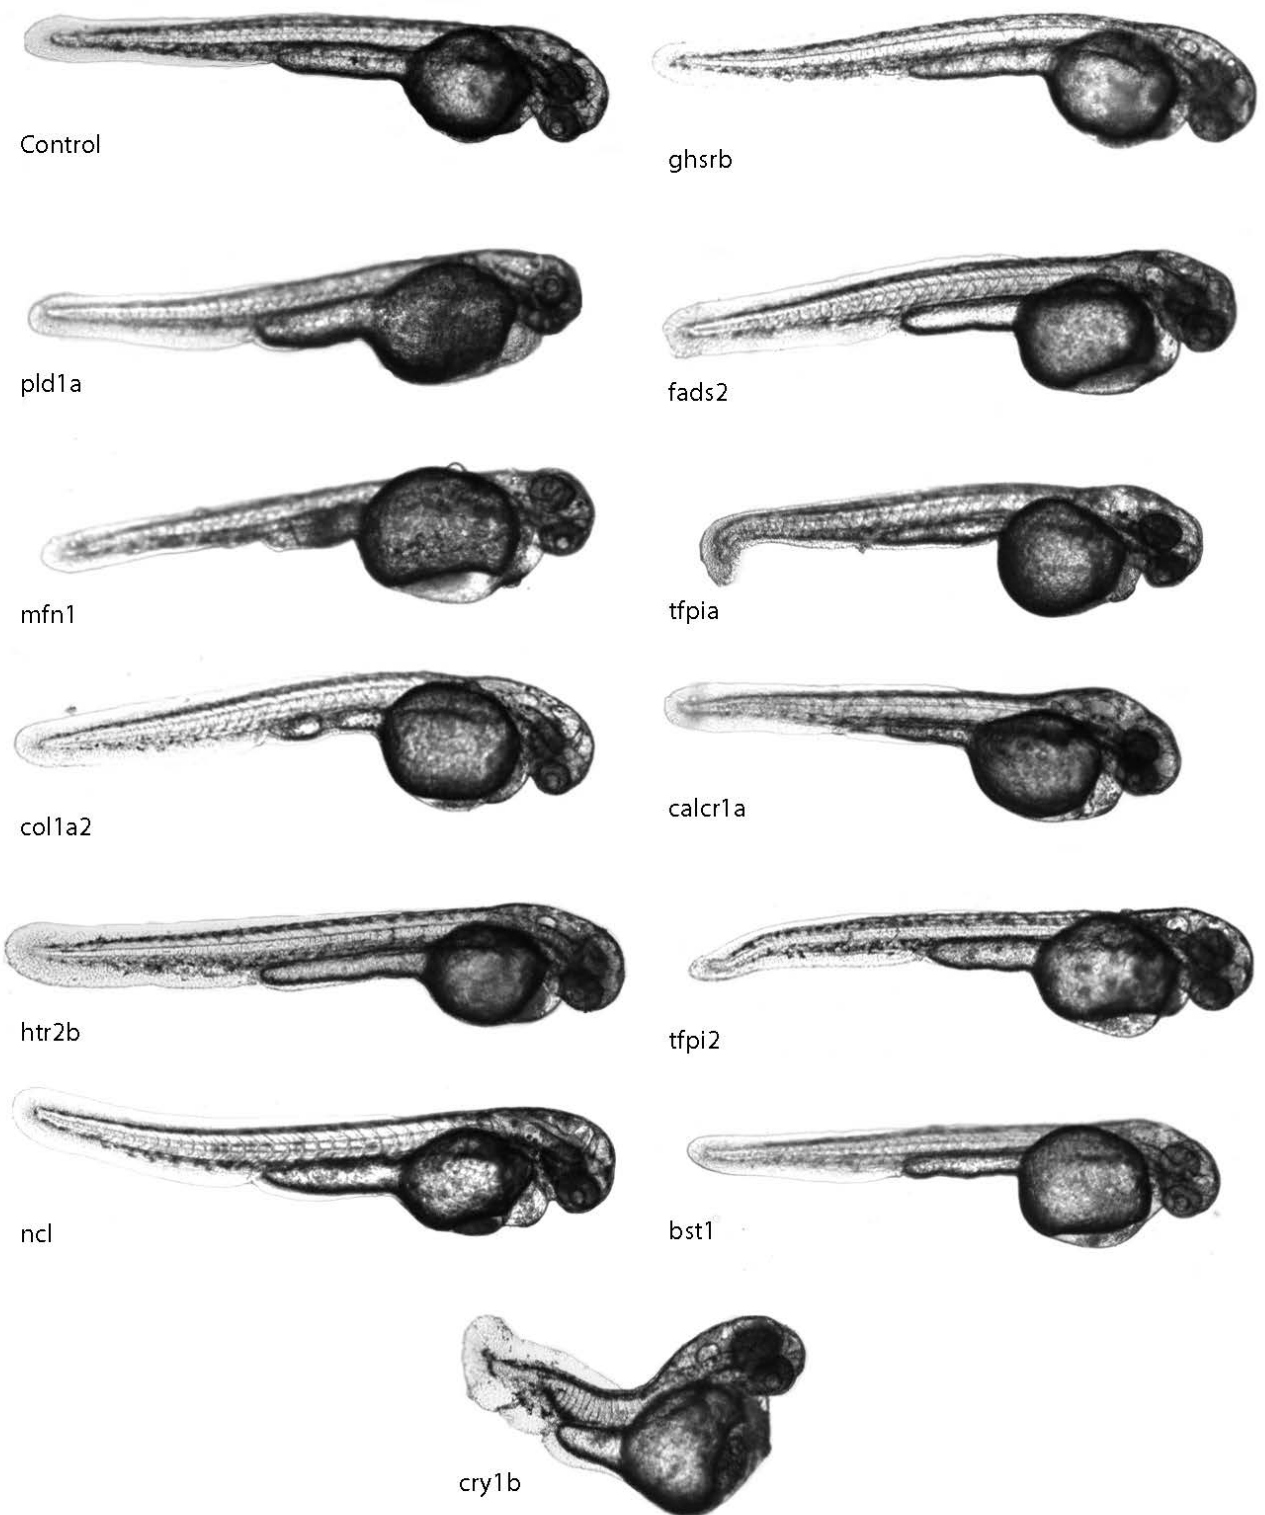

**Supplementary Figure 7 – Visible phenotypes in *Danio rerio* with down-regulated expression of orthologs of positional candidate genes**

When compared with controls injected with PBS, embryos of *Danio rerio* injected with morpholino oligonucleotides targeting orthologs of positional candidate genes for heart rate show distinct visible phenotypes. We observed 1) edema in embryos with a reduced expression of *mfn1* (*MFN1* in humans), *tfpla* (*TFPI*), *tfpl2* (*TFPI2*) and *bst1* (*BEST1*); 2) blood pooling in embryos with a reduced expression of *fads2* (*FADS2*); 3) an unlooped heart in embryos with a reduced expression of *pld1a* (*PLD1*), *htr2b* (*HTR2B*) and *ncl* (*NCL*); 4) an unlooped heart and atrioventricular malformation in embryos with a reduced expression of *calcrla* (*CALCRL*); and 5) dorsalization in embryos with a reduced expression of *cry1b* (*CRY1*). Embryos with a reduced expression of *ghsrb* (*GHR*S) and *col1a2* (*COL1A2*) did not show distinct visible phenotypes.

## 1.2 SUPPLEMENTARY TABLES

**Supplementary Table 1** Study design, number of individuals and sample quality control for genome-wide association studies of stage 1 (**p17-21**)

**Supplementary Table 2** Information on genotyping methods, quality control of SNPs, imputation and statistical analysis for genome-wide association studies of stage 1 (**p22-24**)

**Supplementary Table 3** Study-specific descriptive statistics for genome-wide association studies of stage 1 (**p25-29**)

**Supplementary Table 4** Sensitivity analyses for meta-analysis of stage 1 results (**p30**)

**Supplementary Table 5** The 42 loci associated with heart rate at  $p < 3 \times 10^{-5}$  at stage 1, which were taken forward to stage 2 (**p31-32**)

**Supplementary Table 6** Conditional analyses using meta-analysis of stage 1 results (**p33**)

**Supplementary Table 7** Study design, number of individuals and sample quality control of studies in stage 2 – *in silico* replication using data from studies with data from GWAS, Metabochip and Cardiochip (**p34-35**)

**Supplementary Table 8** Information on genotyping methods, quality control of SNPs, imputation and statistical analysis in studies of stage 2 – *in silico* replication using data from studies with data from GWAS, Metabochip and Cardiochip (**p36**)

**Supplementary Table 9** Study-specific descriptive statistics of studies contributing to *in silico* replication in stage 2 (**p37-39**)

**Supplementary Table 10** Proxy SNPs included in meta-analysis of stage 2 (**p40**)

**Supplementary Table 11** Association of previously confirmed GWAS loci for ECG-derived traits with heart rate in stage 1 results (**p41**)

**Supplementary Table 12** Association of the heart rate loci with the risk of atrioventricular block, pacemaker implantation and sudden cardiac death in data from deCODE Genetics (**p42**)



- Supplementary Table 13** Association of the heart rate loci with blood pressure and the prevalence of hypertension in data from the Global BPgen consortium (**p43**)
- Supplementary Table 14** Association of the heart rate loci with the risk of cardiovascular disease in data from the CARDIoGRAM consortium (**44**)
- Supplementary Table 15** Association of previously confirmed GWAS loci for blood pressure and prevalence of hypertension with heart rate in stage 1 results (**p45**)
- Supplementary Table 16** Association of previously confirmed GWAS loci for prevalence of coronary artery disease and myocardial infarction with heart rate in stage 1 results (**p46**)
- Supplementary Table 17** Genes within 500kb of heart rate loci (**p47**)
- Supplementary Table 18** Gene set enrichment analysis (MAGENTA) of biological pathways using the heart rate GWAS meta-analysis of stage 1 results (**p48-52**)
- Supplementary Table 19** Top ranked gene association scores for gene sets that are significantly enriched with common variant heart rate associations (**p53-55**)
- Supplementary Table 20** Genes located within heart rate loci that are expressed in mouse heart at the protein level (**p56**)
- Supplementary Table 21** Significant associations between heart rate loci and *cis* gene expression (*cis*-eQTLs) in blood (**p57**)
- Supplementary Table 22** Potentially functional variants in LD with heart rate-associated SNPs (**p58**)
- Supplementary Table 23** PubMed and OMIM hits for genes within 500kb of the 21 confirmed heart rate loci, using the search term 'heart' (**p59-63**)
- Supplementary Table 24** Candidate genes for heart rate regulation within the 21 confirmed loci (**p64**)
- Supplementary Table 25** Orthologs and RNAi lines for positional candidate genes in *Drosophila melanogaster* (**p65**)
- Supplementary Table 26** Meta-analysis of effects on heart rate of multiple independent RNAi lines targeting the same ortholog in *Drosophila melanogaster* pupae (**p66**)

**Supplementary Table 27** Orthologs and morpholino oligonucleotides for positional candidate genes in *Danio rerio* (**p67**)

**Supplementary Table 28** Effects on heart rate and arrhythmia in *Drosophila melanogaster* pupae with orthologs of positional candidate genes for heart rate targeted by RNAi lines (**p68**)

**Supplementary Table 29** Effects on heart rate and related traits in *Danio rerio* embryos with orthologs of positional candidate genes for heart rate targeted by morpholino oligonucleotides (**p69**)

**Supplementary Table 30** Characteristics of *Drosophila melanogaster* pupae and *Danio rerio* embryos transfected for orthologs of candidate genes for heart rate (**p70**)



**Supplementary Table 1 - Study design, number of individuals and sample quality control for genome-wide association studies of stage 1**

| Study Short name          | Full name                                                               | Study design                                | Total sample size (N) | Call rate <sup>a</sup> | Sample QC Sample specific QC criteria                                                                                                                                                                                     | Samples in analysis (N) <sup>b</sup> | HR assessment method  | References                                                                   |
|---------------------------|-------------------------------------------------------------------------|---------------------------------------------|-----------------------|------------------------|---------------------------------------------------------------------------------------------------------------------------------------------------------------------------------------------------------------------------|--------------------------------------|-----------------------|------------------------------------------------------------------------------|
| Advance                   | Atherosclerotic Disease, Vascular Function and Genetic Epidemiology     | Population-based case-control study for CAD | 1,028                 | 99.8%                  | Call rate $\leq$ 98.5%; Sex and ethnicity verification using clustering                                                                                                                                                   | 558 (276 CAD cases, 282 controls)    | Peripheral pulse rate | [PMID 18443000] [PMID 21378990]                                              |
| ALSPAC 12-yr old children | Avon Longitudinal Study of Parents And Children Replication             | Population-based                            | 1,760                 | 97%                    | Samples not clustering with CEU in multidimensional scaling; One pair from each putatively related pair; Individuals with missingness > 5%; Individuals with unusual heterozygosities; Individuals with sex discrepancies | 1,486                                | Peripheral pulse rate | [PMID 19181680]                                                              |
| ASCOT cases               | Anglo-Scandinavian Cardiac Outcomes Trial                               | Case-control study of hypertension          | 3,802                 | 99.7%                  | Call rate < 95%; Sample cryptic duplicates; first and second degree relatives; sample outliers in ancestry principal component analysis                                                                                   | 3,802                                | Peripheral pulse rate | [PMID 11403364] [PMID 12686036] [PMID 16154016]                              |
| ATBC                      | Alpha-Tocopherol, Beta-Carotene Cancer Prevention Study                 | Cohort nested case-control study            | 4,447                 | 99%                    | none                                                                                                                                                                                                                      | 4,364                                | Peripheral pulse rate | [PMID 8205268] [PMID 8127329]                                                |
| B58C-T1DGC                | British 1958 Birth Cohort (Type 1 Diabetes Genetic Consortium Controls) | Population-based birth cohort               | 2,592                 | $\geq$ 98%             | none                                                                                                                                                                                                                      | 2,564                                | Peripheral pulse rate | [PMID 19430480] [PMID 17255346]                                              |
| B58C-WTCCC                | British 1958 Birth Cohort (Wellcome trust case control consortium)      | Population-based birth cohort               | 1,480                 | $\geq$ 97%             | none                                                                                                                                                                                                                      | 1,465                                | Peripheral pulse rate | [PMID 17554300]                                                              |
| BLSA                      | Baltimore Longitudinal Study of Aging                                   | Population-based                            | 1,230                 | >98.5%                 | Individual of non-European descent (n = 857); Individuals with sex discrepancies                                                                                                                                          | 844                                  | Peripheral pulse rate | Shock, N.W., et al., Normal Human Aging: The Baltimore Study of Aging. 1984. |
| Bright                    | British Genetics of Hypertension Study                                  | Hypertensive cases                          | 2,000                 | 95.0%                  | Call rate < 95%; minor allele frequency < 1%                                                                                                                                                                              | 1,879                                | Peripheral pulse rate | [PMID 12826435] [PMID 17554300]                                              |
| CoLaus                    | Cohorte Lausannoise                                                     | Population-based                            | 5,636                 | >98.5%                 | Individuals with call rate <90%; Related individuals                                                                                                                                                                      | 5,427                                | Peripheral pulse rate | [PMID 18366642]                                                              |

**Supplementary Table 1 - continued**

| Study Short name | Full name                                                                                                                          | Study design                    | Total sample size (N) | Call rate <sup>a</sup> | Sample QC<br>Sample specific QC criteria                                                                                                                                                                                                                            | Samples in analysis (N) <sup>b</sup> | HR assessment method  | References                                                                                            |
|------------------|------------------------------------------------------------------------------------------------------------------------------------|---------------------------------|-----------------------|------------------------|---------------------------------------------------------------------------------------------------------------------------------------------------------------------------------------------------------------------------------------------------------------------|--------------------------------------|-----------------------|-------------------------------------------------------------------------------------------------------|
| Corogene         | Corogene Study                                                                                                                     | Population-based ACS cases      | 2,169                 | 99.8%                  | Individuals with heart rate > 100 bpm; Individuals with call rate < 95 %; Related individuals ( $\pi$ hat > 0.2 with another sample); Individuals showing evidence of cryptic relatedness ( $\pi$ hat 0.05-0.02 with many samples in dataset)                       | 1,713                                | ECG                   | [PMID 21642350]                                                                                       |
| deCODE           | deCODE Study                                                                                                                       | Population-based                | ~48,000               | ≥98%                   | Yield < 95% in cases or controls; minor allele frequency < 1% in the population; significant deviation from HWE in controls ( $p < 0.001$ ); call rate < 98%                                                                                                        | 11,207                               | ECG                   | [PMID 21378987]                                                                                       |
| DGI              | Diabetes Genetics Initiative of Broad Institute of Harvard and MIT, Lund University and Novartis Institutes of Biomedical Research | Case-control of type 2 diabetes | 3,142                 | >95%                   | Gender inconsistency; First degree cryptic relationship                                                                                                                                                                                                             | 2,678 (1,235 cases, 1,443 controls)  | Peripheral pulse rate | [PMID 17463246]                                                                                       |
| EGCUT            | Estonian Genome Centre, University of Tartu                                                                                        | Population-based                | 2,200                 | >98%                   | Individuals with call-rate ≤ 98%; Individuals with cryptic relatedness; Genetic outliers from PC analyses                                                                                                                                                           | 2,045                                | Peripheral pulse rate | [PMID 19424496] Metspõu, A. The Estonian Genome Project. Drug Development Research 62, 97-101 (2004). |
| EPIC-Norfolk     | European Prospective Investigation into Cancer and Nutrition Norfolk                                                               | Population-based                | 2,566                 | 94%                    | Heterozygosity < 23% or > 30%; > 5.0% discordance in SNP pairs with $r^2=1$ in HapMap; Ethnic outliers; Related individuals; Duplicates                                                                                                                             | 2,413                                | Peripheral pulse rate | [PMID 10466767]                                                                                       |
| Fenland          | Fenland study                                                                                                                      | Population-based                | 1,402                 | ≥95%                   | Individuals with failed heterozygosity check (upperbound 0.2882 lowerbound 0.2735); Individuals with failed relatedness check (sample with lower call rate in related samples); Individuals with failed duplicate check (sample with lower call rate in duplicates) | 1,402                                | Peripheral pulse rate | [PMID 21248185]                                                                                       |
| Fingesture       | Fingesture study                                                                                                                   | Myocardial Infarction cases     | 1,039                 | 99.6%                  | Sample genotyping rate ≤97%                                                                                                                                                                                                                                         | 494                                  | ECG                   | [PMID 12932596] [PMID 17000909]                                                                       |

**Supplementary Table 1 - continued**

| Study Short name | Full name                                                  | Study design                       | Total sample size (N) | Call rate <sup>a</sup> | Sample QC<br>Sample specific QC criteria                                                                                                                                                               | Samples in analysis (N) <sup>b</sup> | HR assessment method  | References                                                                                                                                                               |
|------------------|------------------------------------------------------------|------------------------------------|-----------------------|------------------------|--------------------------------------------------------------------------------------------------------------------------------------------------------------------------------------------------------|--------------------------------------|-----------------------|--------------------------------------------------------------------------------------------------------------------------------------------------------------------------|
| Finrisk          | Finrisk study                                              | Population-based                   | 1,579                 | 99.8%                  | Individuals with call rate < 95 %; Related individuals ( $\pi$ hat > 0.2 with another sample); Individuals showing evidence of cryptic relatedness ( $\pi$ hat 0.05-0.02 with many samples in dataset) | 1,573                                | Peripheral pulse rate | The National FINRISK Study, National Institute for Health and Welfare. (Accessed 6.4.2011, at <a href="http://www.ktl.fi/portal/4168">www.ktl.fi/portal/4168</a> .)      |
| Fusion           | Finland – United States Investigation of NIDDM Genetics    | Case-control of type 2 diabetes    | 2,333                 | >97.5%                 | Gender inconsistency; Related individuals                                                                                                                                                              | 2,256 (1,086 cases, 1,170 controls)  | Peripheral pulse rate | [PMID: 17463248]                                                                                                                                                         |
| GOOD             | The Gothenburg Osteoporosis and Obesity Determinants Study | Population-based                   | 1,056                 | 97.5%                  | Heterozygosity > 33%; Ethnic outliers; Related individuals and duplicates                                                                                                                              | 938                                  | Peripheral pulse rate | [PMID: 16007330]                                                                                                                                                         |
| HAPI             | Heredity and Phenotype Intervention Heart Study            | Family-based                       | 868                   | >93%                   | none                                                                                                                                                                                                   | 847                                  | ECG                   | [PMID 18440328]                                                                                                                                                          |
| HBCS             | Helsinki Birth Cohort Study                                | Population-based                   | 1,676                 | 99.8%                  | Individuals with call rate < 95 %; Related individuals ( $\pi$ hat > 0.2 with another sample); Individuals showing evidence of cryptic relatedness ( $\pi$ hat 0.05-0.02 with many samples in dataset) | 1,293                                | Peripheral pulse rate | IDEFIX Study. National Institute for Health and Welfare, 2009. (Accessed 6.4.2011, 2010, at <a href="http://www.ktl.fi/portal/5481">http://www.ktl.fi/portal/5481</a> .) |
| Health2000       | Health 2000 / GENMETS sub-study                            | Case-control of metabolic syndrome | 2,118                 | 99.9%                  | Individuals with call rate < 95 %; Related individuals ( $\pi$ hat > 0.2 with another sample); Individuals showing evidence of cryptic relatedness ( $\pi$ hat 0.05-0.02 with many samples in dataset) | 1,737 (870 cases, 867 controls)      | Peripheral pulse rate | [PMID 20673644]                                                                                                                                                          |
| Health ABC       | Health Aging and Body Composition Study                    | Population-based                   | 1,814                 | >97%                   | Sample failure; Genotypic sex mismatch; First-degree relatives based on genotype data                                                                                                                  | 1663                                 | ECG                   | [PMID 19435951] [PMID 12902529]                                                                                                                                          |
| Heritage         | Heritage Family Study                                      | Family-based                       | 499                   | 99.9%                  | Individuals with call-rate $\leq$ 95%; Mendelian check; Inconsistent duplicates (12 samples genotyped in duplicate (100% concordance))                                                                 | 499                                  | ECG                   | [PMID 11194095] [PMID 21183627]                                                                                                                                          |

**Supplementary Table 1 - continued**

| <b>Study Short name</b>   | <b>Full name</b>                                   | <b>Study design</b>                                                    | <b>Total sample size (N)</b> | <b>Call rate <sup>a</sup></b> | <b>Sample QC Sample specific QC criteria</b>                                                                                                                                                             | <b>Samples in analysis (N) <sup>b</sup></b> | <b>HR assessment method</b>         | <b>References</b> |
|---------------------------|----------------------------------------------------|------------------------------------------------------------------------|------------------------------|-------------------------------|----------------------------------------------------------------------------------------------------------------------------------------------------------------------------------------------------------|---------------------------------------------|-------------------------------------|-------------------|
| HPFS CHD                  | Health Professional Follow-up Study                | Nested case-control study (population-based) of coronary heart disease | 1,313                        | 99.8%                         | Individuals with call rate <98%; Sex discrepancy with genetic data from X-linked markers; Duplicates; First/second degree relatives; Ancestry outliers; Heterozygosity                                   | 1,065 (348 cases, 717 controls)             | Self-reported peripheral pulse rate | [PMID 1678444]    |
| HPFS Kidney stone disease | Health Professional Follow-up Study                | Nested case-control study (population-based) of kidney stone disease   | 565                          | 99.7%                         | Individuals with call rate <95%; Duplicates; First/second degree relatives; Ancestry outliers                                                                                                            | 530 (303 cases, 227 controls)               | Self-reported peripheral pulse rate | [PMID 1678444]    |
| HPFS type 2 diabetes      | Health Professional Follow-up Study                | Nested case-control study (population-based) of type 2 diabetes        | 2,487                        | 99.7%                         | Individuals with call rate <98%; Sex discrepancy with genetic data from X-linked markers; Duplicates; First/second degree relatives; Ancestry outliers; Heterozygosity; Autosomal chromosome aberrations | 2,271 (1,074 cases, 1,197 controls)         | Self-reported peripheral pulse rate | [PMID 1678444]    |
| Hypergenes                | Hypergenes Study                                   | Case-control of hypertension                                           | 4,058                        | >98.5%                        | Individuals with call rate <90%; Related individuals                                                                                                                                                     | 3,146 (1,518 cases, 1,628 controls)         | Peripheral pulse rate               |                   |
| InCHIANTI                 | InCHIANTI Study                                    | Population-based                                                       | 1,210                        | >97%                          | Sex misspecification; Heterozygosity < 0.3                                                                                                                                                               | 1,129                                       | ECG                                 | [PMID 11129752]   |
| Korcula                   | CROATIA-Korcula                                    | Population-based (isolated)                                            | 898                          | >97%                          | none                                                                                                                                                                                                     | 353                                         | ECG                                 | [PMID 1926014]    |
| LifeLines                 | LifeLines Study                                    | Population-based                                                       | 3,367                        | 95%                           | Non-Caucasian individuals; Related individuals ( $\pi$ -hat > 0.4); Individuals with a gender mismatch                                                                                                   | 3,363                                       | ECG                                 | [PMID 18075776]   |
| Lolipop Cohort            | London Life Sciences Prospective Population Cohort | Population-based                                                       | 2684                         | >90%                          | Duplicates; Individuals with call rate <90%; Related and contaminated samples                                                                                                                            | 1,869                                       | ECG                                 | [PMID 18454146]   |
| Lolipop                   | London Life Sciences Prospective Population Cohort | Case-control of coronary heart disease                                 | 6557                         | ≥ 95%                         | Duplicates; Sex inconsistencies; Related individuals; Individuals with call rate <95%; Ethnic outliers                                                                                                   | 4,699 (1,448 cases, 3,251 controls)         | ECG                                 | [PMID 20062061]   |
| NBS                       | Nijmegen Biomedical Study                          | Population-based                                                       | 1,832                        | ≥95%                          | none                                                                                                                                                                                                     | 551                                         | Peripheral pulse rate               | [PMID 19417041]   |
| NFBC-1966                 | Northern Finland Birth Cohort 1966                 | Population-based                                                       | 4,772                        | 95%                           | First two principal components used to control for population structure                                                                                                                                  | 4,594                                       | Peripheral pulse rate               | [PMID 19060910]   |

**Supplementary Table 1 - continued**

| Study Short name         | Full name                                          | Study design                                                           | Total sample size (N) | Call rate <sup>a</sup> | Sample QC<br>Sample specific QC criteria                                                                                                                                                                 | Samples in analysis (N) <sup>b</sup> | HR assessment method                | References                      |
|--------------------------|----------------------------------------------------|------------------------------------------------------------------------|-----------------------|------------------------|----------------------------------------------------------------------------------------------------------------------------------------------------------------------------------------------------------|--------------------------------------|-------------------------------------|---------------------------------|
| NHS Cancer               | Nurses' Health Study                               | Nested case-control study (population-based) of breast cancer          | 2,287                 | 99.8%                  | Individuals with call rate <90%; Duplicates; First/second degree relatives; Ancestry outliers                                                                                                            | 1,889 (965 cases, 924 controls)      | Self-reported peripheral pulse rate | [PMID 15864280]                 |
| NHS CHD                  | Nurses' Health Study                               | Nested case-control study (population-based) of coronary heart disease | 1,146                 | 99.8%                  | Individuals with call rate <98%; Individuals with sex discrepancy with genetic data from X-linked markers; Duplicates; First/second degree relatives; Ancestry outliers; Heterozygosity                  | 1,020 (297 cases, 723 controls)      | Self-reported peripheral pulse rate | [PMID 15864280]                 |
| NHS Kidney stone disease | Nurses' Health Study                               | Nested case-control study (population-based) of kidney stone disease   | 504                   | 99.7%                  | Individuals with call rate <95%; Duplicates; First/second degree relatives; Ancestry outliers                                                                                                            | 457 (301 cases, 156 controls)        | Self-reported peripheral pulse rate | [PMID 15864280]                 |
| NHS type 2 diabetes      | Nurses' Health Study                               | Nested case-control study (population-based) of type 2 disease         | 3,286                 | 99.7%                  | Individuals with call rate <98%; Sex discrepancy with genetic data from X-linked markers; Duplicates; First/second degree relatives; Ancestry outliers; Heterozygosity; Autosomal chromosome aberrations | 2,878 (1,319 cases, 1,559 controls)  | Self-reported peripheral pulse rate | [PMID 15864280]                 |
| NSPHS06                  | Northern Swedish Population Health Study 2006      | Population-representative, pedigree-based                              | 656                   | 99.4%                  | Individuals with ID call rate <97%; Identical twins and genetic outliers                                                                                                                                 | 591                                  | Peripheral pulse rate               | [PMID 20568910] [PMID 18952825] |
| Prevend                  | Prevention of Renal and Vascular End-stage Disease | Population-based                                                       | 8,592                 | >98%                   | Individuals of non-European descent; Individuals with gender inconsistencies; SNP genotyping rate > 98%                                                                                                  | 3,791                                | ECG                                 | [PMID 21076409]                 |
| Split                    | CROATIA-Split                                      | Population-based                                                       | 499                   | >97%                   | none                                                                                                                                                                                                     | 396                                  | ECG                                 | [PMID 19260138]                 |
| YFS                      | Young Finns Study                                  | Population-based                                                       | 2,443                 | 99.8%                  | Individuals with call rate < 95%; Related individuals ( $\pi$ hat > 0.2 with another sample); Individuals showing evidence of cryptic relatedness ( $\pi$ hat 0.05-0.02 with many samples in dataset)    | 2,083                                | Peripheral pulse rate               | [PMID 18263651]                 |

<sup>a</sup> Sample genotyping success rate, i.e. percentage of successfully genotyped SNPs per sample. <sup>b</sup> Ns reported are numbers for which association data was provided; Ns in paper may differ due to effective sample size in meta-analysis.

**Supplementary Table 2 - Information on genotyping methods, quality control of SNPs, imputation and statistical analysis for genome-wide association studies of stage 1**

| Study                     | Genotyping                                 |                            |      |                                              |                    |                           | Imputation          |      |                                                       | SNPs in GWAS |           |           | $\Lambda_{GC}$ |       |          | Analysis software |
|---------------------------|--------------------------------------------|----------------------------|------|----------------------------------------------|--------------------|---------------------------|---------------------|------|-------------------------------------------------------|--------------|-----------|-----------|----------------|-------|----------|-------------------|
|                           | Platform                                   | Genotype calling algorithm | MAF  | Inclusion criteria<br>Call rate <sup>a</sup> | p HWE              | SNPs that met QC criteria | Imputation software | MAF  | Inclusion criteria<br>Imputation quality <sup>b</sup> | Men          | Women     | Combined  | Men            | Women | Combined |                   |
| Advance CAD cases         | Illumina 550k                              | Beadstudio                 | none | ≥98.5%                                       | >10 <sup>-03</sup> | 543,985                   | BimBam              | none | proper-info ≥ 0.4                                     | 2,170,268    | 2,202,369 | -         | 1.042          | 1.034 | -        | SNPtest           |
| Advance CAD controls      | Illumina 550k                              | Beadstudio                 | none | ≥98.5%                                       | >10 <sup>-03</sup> | 543,985                   | BimBam              | none | proper-info ≥ 0.4                                     | 2,188,816    | 2,222,325 | -         | 1.013          | 0.980 | -        | SNPtest           |
| ALSPAC 12-yr old children | Illumina 317k                              | Beadstudio                 | >1%  | >95%                                         | >10 <sup>-07</sup> | 315,807                   | MACH                | >1%  | $r^2$ hat ≥ 0.3                                       | 2,469,776    | 2,470,902 | -         | 0.982          | 1.000 | -        | MACH2QTL          |
| ASCOT cases               | Illumina Human 370CNV                      | Beadstudio                 | > 0% | >97%                                         | >10 <sup>-07</sup> | 283,291                   | MACH                | none | $r^2$ hat ≥ 0.3                                       | 2,477,983    | 2,461,362 | -         | 1.005          | 1.002 | -        | MACH2QTL          |
| ATBC cases                | Illumina 550k                              | Beadstudio                 | none | ≥97%                                         | none               | 589,345                   | IMPUTE              | none | proper-info ≥ 0.4                                     | 2,532,074    | -         | -         | 1.014          | -     | -        | SNPtest           |
| ATBC controls             | Illumina 550k                              | Beadstudio                 | none | ≥97%                                         | none               | 589,345                   | IMPUTE              | none | proper-info ≥ 0.4                                     | 2,532,074    | -         | -         | 1.014          | -     | -        | SNPtest           |
| B58C-T1DGC                | Illumina 550k                              | ILLUMINUS                  | >0%  | none                                         | none               | 539,458                   | MACH                | none | $r^2$ hat ≥ 0.3                                       | 2,507,130    | 2,507,796 | -         | 1.005          | 0.996 | -        | ProbABEL          |
| B58C-WTCCC                | Affymetrix GeneChip Human Mapping 500k     | CHIAMO                     | >0%  | none                                         | none               | 490,032                   | IMPUTE              | none | proper-info ≥ 0.4                                     | 2,442,062    | 2,440,831 | -         | 1.025          | 1.008 | -        | SNPtest           |
| BLSA                      | Illumina 550k                              | Beadstudio                 | ≥1%  | ≥98.5                                        | >10 <sup>-04</sup> | 514,027                   | MACH                | ≥1%  | $r^2$ hat ≥ 0.3                                       | 2,452,788    | 2,453,963 | -         | 1.030          | 0.986 | -        | Merlin            |
| Bright                    | Affymetrix GeneChip Human Mapping 500k     | CHIAMO                     | ≥5%  | ≥95%                                         | >10 <sup>-06</sup> | 387,666                   | IMPUTE              | none | proper-info ≥ 0.4                                     | 1,566,044    | 1,569,765 | -         | 1.014          | 1.000 | -        | SNPtest           |
| CoLaus                    | Affymetrix GeneChip Human Mapping 500k     | BRLMM                      | ≥1%  | ≥70%                                         | >10 <sup>-07</sup> | 390,631                   | IMPUTE              | none | proper-info ≥ 0.4                                     | 2,435,038    | 2,435,772 | -         | 1.000          | 1.002 | -        | Matlab            |
| Corogene                  | Illumina 610k                              | Illuminus                  | ≥1%  | ≥95%                                         | >10 <sup>-06</sup> | 554,988                   | MACH                | none | $r^2$ hat ≥ 0.3                                       | 2,476,908    | 2,455,987 | -         | 1.006          | 1.004 | -        | ProbABEL          |
| deCODE                    | Illumina HumanHap 300 / CNV370 / 610K / 1M | Beadstudio                 | ≥1%  | ≥98%                                         | >10 <sup>-03</sup> | 306,060                   | IMPUTE              | none | proper-info ≥ 0.4                                     | -            | -         | 2,499,244 | -              | -     | 1.185    | SNPtest           |
| DGI Cases                 | Affymetrix GeneChip Human Mapping 500k     | BRLMM                      | >5%  | ≥95%                                         | >10 <sup>-06</sup> | 347,010                   | MACH                | ≥1%  | $r^2$ hat ≥ 0.3                                       | 2,197,687    | 2,307,762 | -         | 1.038          | 1.138 | -        | ProbABEL / PLINK  |
| DGI controls              | Affymetrix GeneChip Human Mapping 500k     | BRLMM                      | >5%  | ≥95%                                         | >10 <sup>-06</sup> | 347,010                   | MACH                | ≥1%  | $r^2$ hat ≥ 0.3                                       | 2,373,737    | 2,373,024 | -         | 0.996          | 1.038 | -        | ProbABEL / PLINK  |
| EGCUT                     | Illumina Human 370CNV                      | Beadstudio                 | ≥1%  | ≥98%                                         | >10 <sup>-06</sup> | 299,484                   | IMPUTE              | none | proper-info ≥ 0.4                                     | 2,449,580    | 2,452,359 | -         | 1.005          | 1.013 | -        | SNPtest           |

Supplementary Table 2 - Continued

| Study                     | Platform                               | Genotype calling algorithm | Genotyping |                                              |                    | SNPs that met QC criteria | Imputation software | Imputation |                                                       | SNPs in GWAS |           |           | $\Lambda_{GC}$ |       |          | Analysis software       |
|---------------------------|----------------------------------------|----------------------------|------------|----------------------------------------------|--------------------|---------------------------|---------------------|------------|-------------------------------------------------------|--------------|-----------|-----------|----------------|-------|----------|-------------------------|
|                           |                                        |                            | MAF        | Inclusion criteria<br>Call rate <sup>a</sup> | <i>P</i> HWE       |                           |                     | MAF        | Inclusion criteria<br>Imputation quality <sup>b</sup> | Men          | Women     | Combined  | Men            | Women | Combined |                         |
| EPIC-Norfolk              | Affymetrix GeneChip Human Mapping 500k | BRLMM                      | ≥1%        | ≥90%                                         | >10 <sup>-06</sup> | 397,438                   | IMPUTE              | none       | proper-info ≥ 0.4                                     | 2,384,644    | 2,385,927 | -         | 1.010          | 1.020 | -        | SNPtest                 |
| Fenland                   | Affymetrix GeneChip Human Mapping 500k | BRLMM                      | ≥1%        | ≥90%                                         | >10 <sup>-06</sup> | 362,055                   | IMPUTE              | none       | proper-info ≥ 0.4                                     | 2,393,893    | 2,398,580 | -         | 1.026          | 1.007 | -        | SNPtest                 |
| Fingesture                | Affymetrix SNP 6.0                     | Birdsuite                  | >5%        | ≥95%                                         | none               | 628,197                   | MACH                | none       | $r^2$ hat ≥ 0.3                                       | 2,413,618    | 2,302,288 | -         | 0.992          | 1.013 | -        | MACH2QTL                |
| Finrisk                   | Illumina 610k                          | Illuminus                  | ≥1%        | ≥95%                                         | >10 <sup>-06</sup> | 554,998                   | MACH                | none       | $r^2$ hat ≥ 0.3                                       | 2,475,284    | 2,470,227 | -         | 1.006          | 1.001 | -        | ProbABEL                |
| Fusion cases              | Illumina Infinium II HumanHap 300      | Beadstudio                 | >1%        | ≥90%                                         | ≥10 <sup>-06</sup> | 315,635                   | MACH                | none       | $r^2$ hat ≥ 0.3                                       | 2,452,444    | 2,441,621 | -         | 0.989          | 1.036 | -        | MACH2QTL                |
| Fusion controls           | Illumina Infinium II HumanHap 300      | Beadstudio                 | >1%        | ≥90%                                         | ≥10 <sup>-06</sup> | 315,635                   | MACH                | none       | $r^2$ hat ≥ 0.3                                       | 2,449,757    | 2,451,127 | -         | 0.984          | 1.017 | -        | MACH2QTL                |
| GOOD                      | Illumina 610k                          | Beadstudio                 | ≥1%        | ≥98%                                         | >10 <sup>-06</sup> | 521,160                   | MACH                | none       | $r^2$ hat ≥ 0.3                                       | 2,489,341    | -         | -         | 1.012          | -     | -        | MACH2QTL via GRIMP MMAP |
| HAPI                      | Affymetrix GeneChip Human Mapping 500k | BRLMM                      | >1%        | >95%                                         | ≥10 <sup>-06</sup> | 338,593                   | MACH                | none       | $r^2$ hat ≥ 0.3                                       | -            | -         | 2,290,109 | -              | -     | 1.052    |                         |
| HBCS                      | Illumina 670k                          | Illuminus                  | ≥1%        | ≥95%                                         | >10 <sup>-06</sup> | 546,814                   | MACH                | none       | $r^2$ hat ≥ 0.3                                       | 2,468,180    | 2,474,682 | -         | 0.994          | 1.001 | -        | ProbABEL                |
| Health 2000 cases         | Illumina 610k                          | Illuminus                  | ≥1%        | ≥95%                                         | >10 <sup>-06</sup> | 555,388                   | MACH                | none       | $r^2$ hat ≥ 0.3                                       | 2,440,493    | 2,440,623 | -         | 0.986          | 1.011 | -        | ProbABEL                |
| Health 2000 controls      | Illumina 610k                          | Illuminus                  | ≥1%        | ≥95%                                         | >10 <sup>-06</sup> | 555,388                   | MACH                | none       | $r^2$ hat ≥ 0.3                                       | 2,440,282    | 2,443,226 | -         | 0.997          | 1.004 | -        | ProbABEL                |
| Health ABC                | Illumina Human 1M                      | Beadstudio                 | ≥1%        | >97%                                         | ≥10 <sup>-06</sup> | 914,263                   | MACH                | ≥1%        | $r^2$ hat ≥ 0.3                                       | 2,502,586    | 2,500,872 | -         | 1.015          | 1.003 | -        | R                       |
| Heritage                  | Illumina 370k                          | GenomeStudio               | >1%        | >95%                                         | >10 <sup>-06</sup> | 324,611                   | MACH                | none       | $r^2$ hat ≥ 0.3                                       | -            | -         | 2,227,923 | -              | -     | 1.042    | Merlin                  |
| HPFS CHD cases            | Affymetrix SNP 6.0                     | Birdseed                   | ≥2%        | ≥98%                                         | ≥10 <sup>-04</sup> | 724,881                   | MACH                | none       | $r^2$ hat ≥ 0.3                                       | 2,464,474    | -         | -         | 1.015          | -     | -        | ProbABEL                |
| HPFS CHD controls         | Affymetrix SNP 6.0                     | Birdseed                   | ≥2%        | ≥98%                                         | ≥10 <sup>-04</sup> | 724,881                   | MACH                | none       | $r^2$ hat ≥ 0.3                                       | 2,489,985    | -         | -         | 1.013          | -     | -        | ProbABEL                |
| HPFS Kidneystone cases    | Illumina 610k                          | Beadstudio                 | ≥1%        | ≥95%                                         | ≥10 <sup>-05</sup> | 546,344                   | MACH                | none       | $r^2$ hat ≥ 0.3                                       | 2,461,670    | -         | -         | 1.014          | -     | -        | ProbABEL                |
| HPFS Kidneystone controls | Illumina 610k                          | Beadstudio                 | ≥1%        | ≥95%                                         | ≥10 <sup>-05</sup> | 546,344                   | MACH                | none       | $r^2$ hat ≥ 0.3                                       | 2,437,287    | -         | -         | 0.991          | -     | -        | ProbABEL                |
| HPFS t2d cases            | Affymetrix SNP 6.0                     | Birdseed                   | ≥2%        | ≥98%                                         | ≥10 <sup>-04</sup> | 706,040                   | MACH                | none       | $r^2$ hat ≥ 0.3                                       | 2,496,777    | -         | -         | 0.991          | -     | -        | ProbABEL                |
| HPFS t2d controls         | Affymetrix SNP 6.0                     | Birdseed                   | ≥2%        | ≥98%                                         | ≥10 <sup>-04</sup> | 706,040                   | MACH                | none       | $r^2$ hat ≥ 0.3                                       | 2,497,949    | -         | -         | 0.987          | -     | -        | ProbABEL                |

Supplementary Table 2 - Continued

| Study                      | Platform                            | Genotype calling algorithm | Genotyping |                                              |                 |         | SNPs that met QC criteria | Imputation software | Imputation             |                                                       | SNPs in GWAS |           |          | $\Lambda_{GC}$ |       |                            | Analysis software |
|----------------------------|-------------------------------------|----------------------------|------------|----------------------------------------------|-----------------|---------|---------------------------|---------------------|------------------------|-------------------------------------------------------|--------------|-----------|----------|----------------|-------|----------------------------|-------------------|
|                            |                                     |                            | MAF        | Inclusion criteria<br>Call rate <sup>a</sup> | p HWE           |         |                           |                     | MAF                    | Inclusion criteria<br>Imputation quality <sup>b</sup> | Men          | Women     | Combined | Men            | Women | Combined                   |                   |
| Hypergenes cases           | Illumina Human 1M                   | Beadstudio                 | >1%        | >90%                                         | $\geq 10^{-07}$ | 839,514 | MACH                      | none                | $r^2$ hat $\geq 0.3$   | 2,497,650                                             | 2,483,920    | -         | 1.000    | 1.000          | -     | Matlab                     |                   |
| Hypergenes controls        | Illumina Human 1M                   | Beadstudio                 | >1%        | >90%                                         | $\geq 10^{-07}$ | 839,514 | MACH                      | none                | $r^2$ hat $\geq 0.3$   | 2,497,226                                             | 2,489,973    | -         | 1.001    | 1.001          | -     | Matlab                     |                   |
| Inchianti                  | Illumina 550k                       | Beadstudio                 | $\geq 1\%$ | $\geq 97\%$                                  | $> 10^{-06}$    | 498,838 | MACH                      | $\geq 1\%$          | $r^2$ hat $\geq 0.3$   | 2,447,636                                             | 2,447,644    | -         | 1.033    | 1.004          | -     | Merlin                     |                   |
| Korcula                    | Illumina 370k                       | GenomeStudio               | >1%        | >98%                                         | $> 10^{-06}$    | 330,889 | MACH                      | None                | $r^2$ hat $\geq 0.3$   | -                                                     | -            | 2,381,518 | -        | -              | 1.058 | GenABEL / ProbABEL SNPtest |                   |
| LifeLines                  | Illumina HumanCyto SNP 12 V2        | GenomeStudio               | >1%        | >95%                                         | $> 10^{-05}$    | 247,151 | IMPUTE                    | none                | proper-info $\geq 0.4$ | 2,435,581                                             | 2,437,849    | -         | 1.008    | 1.007          | -     | -                          |                   |
| Lolipop Cohort             | Illumina HumanHap 300K              | Beadstudio                 | $\geq 1\%$ | >90%                                         | $> 10^{-06}$    | 245,892 | MACH                      | none                | $r^2$ hat $\geq 0.3$   | 1,896,229                                             | -            | -         | 0.992    | -              | -     | MACH2QTL                   |                   |
| Lolipop Cases              | Illumina Human610                   | Beadstudio                 | $\geq 1\%$ | >90%                                         | $> 10^{-06}$    | 544,390 | MACH                      | none                | $r^2$ hat $\geq 0.3$   | 2,225,030                                             | 2,222,309    | -         | 1.004    | 0.989          | -     | MACH2QTL                   |                   |
| Lolipop Controls           | Illumina Human610                   | Beadstudio                 | $\geq 1\%$ | >90%                                         | $> 10^{-06}$    | 544,390 | MACH                      | none                | $r^2$ hat $\geq 0.3$   | 2,225,021                                             | 2,224,640    | -         | 1.007    | 0.996          | -     | MACH2QTL                   |                   |
| NBS                        | Illumina Human 370CNV               | beadstudio                 | none       | $\geq 98\%$                                  | $\geq 10^{-10}$ | 302,140 | IMPUTE                    | none                | proper-info $\geq 0.4$ | -                                                     | -            | 1,813,776 | -        | -              | 0.980 | SNPtest                    |                   |
| NFBC-1966                  | Illumina 370k                       | Beadstudio                 | $\geq 5\%$ | $\geq 95\%$                                  | $> 10^{-04}$    | 328,007 | IMPUTE                    | none                | proper-info $\geq 0.4$ | 2,217,812                                             | 2,217,855    | -         | 1.017    | 1.012          | -     | SNPtest                    |                   |
| NHS Cancer cases           | Illumina 550k                       | BeadStudio                 | $\geq 1\%$ | $\geq 90\%$                                  | none            | 546,646 | MACH                      | none                | $r^2$ hat $\geq 0.3$   | -                                                     | 2,501,568    | -         | -        | 0.987          | -     | ProbABEL                   |                   |
| NHS Cancer controls        | Illumina 550k                       | BeadStudio                 | $\geq 1\%$ | $\geq 90\%$                                  | none            | 546,646 | MACH                      | none                | $r^2$ hat $\geq 0.3$   | -                                                     | 2,500,201    | -         | -        | 1.014          | -     | ProbABEL                   |                   |
| NHS CHD cases              | Affymetrix SNP 6.0                  | Birdseed v2                | $\geq 2\%$ | $\geq 98\%$                                  | $\geq 10^{-04}$ | 721,316 | MACH                      | none                | $r^2$ hat $\geq 0.3$   | -                                                     | 2,449,640    | -         | -        | 1.026          | -     | ProbABEL                   |                   |
| NHS CHD controls           | Affymetrix SNP 6.0                  | Birdseed v2                | $\geq 2\%$ | $\geq 98\%$                                  | $\geq 10^{-04}$ | 721,316 | MACH                      | none                | $r^2$ hat $\geq 0.3$   | -                                                     | 2,488,711    | -         | -        | 1.011          | -     | ProbABEL                   |                   |
| NHS Kidney stones cases    | Illumina 610Q                       | BeadStudio                 | $\geq 1\%$ | $\geq 95\%$                                  | $\geq 10^{-05}$ | 546,344 | MACH                      | none                | $r^2$ hat $\geq 0.3$   | -                                                     | 2,457,587    | -         | -        | 1.020          | -     | ProbABEL                   |                   |
| NHS Kidney stones controls | Illumina 610Q                       | BeadStudio                 | $\geq 1\%$ | $\geq 95\%$                                  | $\geq 10^{-05}$ | 546,344 | MACH                      | none                | $r^2$ hat $\geq 0.3$   | -                                                     | 2,389,337    | -         | -        | 1.008          | -     | ProbABEL                   |                   |
| NHS t2d cases              | Affymetrix SNP 6.0                  | Birdseed v2                | $\geq 2\%$ | $\geq 98\%$                                  | $\geq 10^{-04}$ | 704,409 | MACH                      | none                | $r^2$ hat $\geq 0.3$   | -                                                     | 2,498,519    | -         | -        | 1.002          | -     | ProbABEL                   |                   |
| NHS t2d controls           | Affymetrix SNP 6.0                  | Birdseed v2                | $\geq 2\%$ | $\geq 98\%$                                  | $\geq 10^{-04}$ | 704,409 | MACH                      | none                | $r^2$ hat $\geq 0.3$   | -                                                     | 2,500,345    | -         | -        | 1.021          | -     | ProbABEL                   |                   |
| NSPHS06                    | Illumina Infinium II HumanHap 300v2 | BeadStudio                 | $\geq 1\%$ | $\geq 98\%$                                  | $> 10^{-06}$    | 318,236 | MACH                      | none                | $r^2$ hat $\geq 0.3$   | -                                                     | -            | 2,382,230 | -        | -              | 0.975 | R / GenABEL / ProbABEL     |                   |
| Prevend                    | Illumina HumanCyto SNP              | GenomeStudio               | >1%        | >95%                                         | $> 10^{-05}$    | 244868  | BEAGLE                    | none                | info $> 0.8$           | 1,330,278                                             | 1,330,539    | -         | 1.017    | 1.006          | -     | PLINK                      |                   |
| Split                      | Illumina 370k                       | GenomeStudio               | >1%        | >98%                                         | $> 10^{-06}$    | 316,643 | MACH                      | none                | $r^2$ hat $\geq 0.3$   | -                                                     | -            | 2,431,670 | -        | -              | 0.984 | GenABEL / ProbABEL         |                   |
| YFS                        | Illumina 610k                       | Illuminus                  | $\geq 1\%$ | $\geq 95\%$                                  | $> 10^{-06}$    | 546,677 | MACH                      | none                | $r^2$ hat $\geq 0.3$   | 2,468,546                                             | 2,472,150    | -         | 1.006    | 1.015          | -     | ProbABEL                   |                   |

<sup>a</sup> Sample genotyping success rate; that is, the percentage of successfully genotyped SNPs per sample.

<sup>b</sup> SNPtest calculates the 'proper info' statistics as a measure of the relative statistical information about the additive genetic effect being estimated. The proper info statistic has a direct relationship to the power of the test and ranges from 0 to 1, with 1 indicating perfect imputation. MACH calculates  $rsq\_hat$ , which is the  $r^2$  between each imputed genotype and its true underlying genotype.  $rsq\_hat$  ranges from 0 to 1, with 1 indicating perfect imputation.



**Supplementary Table 3 - Study-specific descriptive statistics for genome-wide association studies of stage 1**

| Study                            | Trait                    | Men   |      |      |        |      |       | Women |      |      |        |      |       |
|----------------------------------|--------------------------|-------|------|------|--------|------|-------|-------|------|------|--------|------|-------|
|                                  |                          | N     | mean | SD   | median | min  | max   | N     | mean | SD   | median | min  | max   |
| <b>Advance CAD cases</b>         | Age (yrs)                | 113   | 40.5 | 3.9  | 41.3   | 20.4 | 45.1  | 160   | 49.5 | 4.7  | 50.5   | 34.0 | 55.0  |
|                                  | BMI (kg/m <sup>2</sup> ) | 113   | 31.2 | 5.4  | 30.9   | 19.5 | 43.6  | 160   | 31.2 | 7.9  | 30.6   | 17.3 | 61.1  |
|                                  | HR (BPM)                 | 113   | 62.2 | 9.6  | 62.0   | 43.0 | 95.0  | 160   | 63.8 | 10.4 | 62.0   | 42.0 | 103.0 |
| <b>Advance CAD controls</b>      | Age (yrs)                | 127   | 40.5 | 3.2  | 41.2   | 33.4 | 46.8  | 181   | 48.7 | 4.5  | 49.9   | 34.8 | 55.4  |
|                                  | BMI (kg/m <sup>2</sup> ) | 127   | 27.0 | 4.5  | 26.3   | 17.9 | 49.4  | 181   | 26.1 | 6.4  | 24.7   | 15.8 | 54.1  |
|                                  | HR (BPM)                 | 127   | 64.8 | 12.3 | 64.0   | 40.0 | 132.0 | 181   | 65.7 | 11.9 | 66.0   | 45.0 | 160.0 |
| <b>ALSPAC 12-yr old children</b> | Age (yrs)                | 722   | 11.7 | 2.2  | 11.7   | 11.2 | 12.4  | 764   | 11.7 | 2.4  | 11.7   | 10.6 | 13.3  |
|                                  | BMI (kg/m <sup>2</sup> ) | 722   | 18.6 | 3.1  | 17.9   | 12.8 | 30.9  | 764   | 19.0 | 3.2  | 18.4   | 12.4 | 34.1  |
|                                  | HR (BPM)                 | 722   | 72.5 | 10.4 | 72.0   | 44.5 | 111.5 | 764   | 77.4 | 10.5 | 77.0   | 49.5 | 110.0 |
| <b>ASCOT cases</b>               | Age (yrs)                | 3,129 | 63.5 | 8.2  | 64.0   | 40.0 | 80.0  | 673   | 64.5 | 7.6  | 64.0   | 41.0 | 80.0  |
|                                  | BMI (kg/m <sup>2</sup> ) | 3,129 | 28.9 | 4.6  | 28.4   | 15.1 | 88.8  | 673   | 29.4 | 5.7  | 28.7   | 16.5 | 52.1  |
|                                  | HR (BPM)                 | 3,129 | 70.2 | 12.1 | 69.0   | 40.5 | 115.5 | 673   | 72.6 | 12.2 | 72.0   | 45.0 | 125.0 |
| <b>ATBC cases</b>                | Age (yrs)                | 2,782 | 58.2 | 4.9  | 58.0   | 49.0 | 70.0  |       |      |      |        |      |       |
|                                  | BMI (kg/m <sup>2</sup> ) | 2,782 | 26.0 | 3.7  | 25.7   | 16.9 | 49.4  |       |      |      |        |      |       |
|                                  | HR (BPM)                 | 2,782 | 72.1 | 10.9 | 72.0   | 42.0 | 132.0 |       |      |      |        |      |       |
| <b>ATBC controls</b>             | Age (yrs)                | 1,582 | 57.8 | 5.1  | 57.0   | 49.0 | 70.0  |       |      |      |        |      |       |
|                                  | BMI (kg/m <sup>2</sup> ) | 1,582 | 26.4 | 3.8  | 26.2   | 16.1 | 45.7  |       |      |      |        |      |       |
|                                  | HR (BPM)                 | 1,582 | 70.8 | 10.9 | 70.0   | 46.0 | 118.0 |       |      |      |        |      |       |
| <b>B58C T1DGC</b>                | Age (yrs)                | 1,249 | 45.3 | 0.3  | 45.3   | 44.5 | 46.0  | 1,315 | 45.3 | 0.3  | 45.3   | 44.5 | 46.0  |
|                                  | BMI (kg/m <sup>2</sup> ) | 1,249 | 28.0 | 4.1  | 27.6   | 16.8 | 51.6  | 1,315 | 26.9 | 5.5  | 25.7   | 17.2 | 52.2  |
|                                  | HR (BPM)                 | 1,249 | 70.3 | 11.0 | 42.0   | 70.0 | 109.0 | 1,315 | 72.3 | 10.1 | 72.0   | 39.0 | 111.0 |
| <b>B58C WTCCC</b>                | Age (yrs)                | 738   | 44.9 | 0.3  | 44.8   | 44.5 | 45.6  | 727   | 44.9 | 0.4  | 44.8   | 44.5 | 45.6  |
|                                  | BMI (kg/m <sup>2</sup> ) | 738   | 27.8 | 4.3  | 27.2   | 15.9 | 48.4  | 727   | 26.8 | 5.2  | 25.5   | 17.3 | 54.0  |
|                                  | HR (BPM)                 | 738   | 69.9 | 11.3 | 69.0   | 42.0 | 113.0 | 727   | 72.6 | 9.9  | 72.0   | 44.0 | 106.0 |
| <b>BLSA</b>                      | Age (yrs)                | 460   | 70.8 | 15.8 | 74.0   | 22.0 | 96.0  | 384   | 65.5 | 17.5 | 66.0   | 21.0 | 97.0  |
|                                  | BMI (kg/m <sup>2</sup> ) | 460   | 27.3 | 4.4  | 26.6   | 19.2 | 45.2  | 384   | 25.7 | 4.8  | 24.8   | 16.8 | 46.9  |
|                                  | HR (BPM)                 | 460   | 65.1 | 12.0 | 64.0   | 40.0 | 108.0 | 384   | 68.1 | 10.8 | 67.0   | 42.0 | 128.0 |
| <b>Bright cases</b>              | Age (yrs)                | 746   | 56.0 | 12.0 | 57.0   | 17.0 | 82.0  | 1,133 | 54.0 | 12.0 | 55.0   | 17.0 | 82.0  |
|                                  | BMI (kg/m <sup>2</sup> ) | 746   | 28.0 | 3.0  | 28.0   | 17.0 | 40.0  | 1,133 | 27.0 | 4.0  | 27.0   | 17.0 | 42.0  |
|                                  | HR (BPM)                 | 746   | 69.0 | 12.0 | 69.0   | 42.0 | 112.0 | 1,133 | 70.0 | 12.0 | 69.0   | 40.0 | 111.0 |
| <b>CoLAUS</b>                    | Age (yrs)                | 2,560 | 52.9 | 10.6 | 52.2   | 34.9 | 75.1  | 2,867 | 53.9 | 10.7 | 53.7   | 35.0 | 75.4  |
|                                  | BMI (kg/m <sup>2</sup> ) | 2,560 | 26.6 | 4.0  | 26.2   | 11.7 | 81.1  | 2,867 | 25.2 | 4.8  | 24.2   | 8.1  | 59.2  |
|                                  | HR (BPM)                 | 2,560 | 67.4 | 10.6 | 67.0   | 40.0 | 158.0 | 2,867 | 68.6 | 9.1  | 68.0   | 42.5 | 116.5 |
| <b>Corogene cases</b>            | Age (yrs)                | 1,166 | 64.5 | 11.5 | 64.6   | 26.5 | 91.8  | 547   | 70.6 | 11.1 | 71.9   | 33.3 | 98.8  |
|                                  | BMI (kg/m <sup>2</sup> ) | 1,166 | 27.6 | 4.3  | 26.9   | 18.0 | 52.5  | 547   | 27.1 | 5.4  | 26.8   | 13.6 | 57.7  |
|                                  | HR (BPM)                 | 1,166 | 66.5 | 13.2 | 65.0   | 32.0 | 100.0 | 547   | 68.1 | 13.1 | 67.0   | 37.0 | 100.0 |

Supplementary Table 3 - continued

| Study                   | Trait                    | Men   |      |      |        |      |       | Women |      |      |        |      |       |
|-------------------------|--------------------------|-------|------|------|--------|------|-------|-------|------|------|--------|------|-------|
|                         |                          | N     | mean | SD   | median | min  | max   | N     | mean | SD   | median | min  | max   |
| <b>deCODE</b>           | Age (yrs)                | 4,743 | 70.8 | 12.5 | 72.8   | 16.9 | 101.7 | 6,464 | 68.7 | 14.7 | 71.1   | 18.9 | 103.8 |
|                         | BMI (kg/m <sup>2</sup> ) | 4,743 | 27.9 | 4.7  | 27.2   | 14.5 | 72.1  | 6,464 | 27.4 | 5.5  | 26.6   | 13.7 | 70.2  |
|                         | HR (BPM)                 | 4,743 | 72.5 | 14.9 | 70.5   | 38.0 | 173.0 | 6,464 | 75.4 | 15.1 | 73.1   | 32.0 | 160.0 |
| <b>DGI cases</b>        | Age (yrs)                | 620   | 62.4 | 10.1 | 63.5   | 36.9 | 90.5  | 615   | 64.5 | 10.4 | 65.2   | 31.1 | 86.4  |
|                         | BMI (kg/m <sup>2</sup> ) | 620   | 28.2 | 3.9  | 28.1   | 18.0 | 46.7  | 615   | 29.0 | 4.9  | 28.5   | 18.5 | 53.7  |
|                         | HR (BPM)                 | 620   | 65.1 | 15.3 | 66.0   | 30.0 | 100.0 | 615   | 67.6 | 14.1 | 70.0   | 30.0 | 100.0 |
| <b>DGI controls</b>     | Age (yrs)                | 695   | 58.0 | 10.2 | 58.4   | 31.7 | 83.6  | 748   | 58.8 | 10.0 | 59.3   | 33.7 | 85.8  |
|                         | BMI (kg/m <sup>2</sup> ) | 695   | 26.7 | 3.2  | 26.4   | 17.0 | 43.9  | 748   | 26.8 | 4.3  | 26.3   | 18.0 | 45.6  |
|                         | HR (BPM)                 | 695   | 63.5 | 10.3 | 64.0   | 30.0 | 93.0  | 748   | 65.3 | 11.9 | 66.0   | 30.0 | 100.0 |
| <b>EGCUT</b>            | Age (yrs)                | 938   | 40.0 | 16.4 | 37.0   | 18.0 | 90.0  | 1,107 | 41.3 | 15.9 | 40.0   | 18.0 | 92.0  |
|                         | BMI (kg/m <sup>2</sup> ) | 938   | 25.9 | 4.5  | 25.2   | 15.8 | 54.0  | 1,107 | 25.8 | 5.9  | 24.5   | 15.6 | 58.4  |
|                         | HR (BPM)                 | 938   | 69.0 | 10.1 | 68.0   | 44.0 | 120.0 | 1,107 | 68.7 | 8.2  | 68.0   | 44.0 | 120.0 |
| <b>EPIC-Norfolk</b>     | Age (yrs)                | 1,130 | 59.8 | 9.1  | 60.0   | 40.0 | 77.0  | 1,280 | 58.7 | 8.9  | 59.0   | 39.0 | 77.0  |
|                         | BMI (kg/m <sup>2</sup> ) | 1,130 | 26.6 | 3.2  | 26.2   | 16.9 | 42.1  | 1,280 | 26.2 | 4.3  | 25.5   | 16.1 | 47.6  |
|                         | HR (BPM)                 | 1,130 | 68.7 | 11.8 | 67.5   | 38.0 | 115.5 | 1,280 | 72.8 | 10.7 | 72.0   | 43.5 | 113.0 |
| <b>Fenland</b>          | Age (yrs)                | 615   | 44.5 | 7.3  | 45.0   | 30.0 | 57.0  | 787   | 45.3 | 7.2  | 46.0   | 30.0 | 57.0  |
|                         | BMI (kg/m <sup>2</sup> ) | 615   | 27.6 | 4.1  | 27.3   | 18.6 | 56.7  | 787   | 26.7 | 5.5  | 25.4   | 17.3 | 55.4  |
|                         | HR (BPM)                 | 615   | 60.6 | 8.8  | 59.0   | 38.0 | 102.0 | 785   | 63.8 | 8.4  | 63.0   | 43.0 | 105.0 |
| <b>Fingesture cases</b> | Age (yrs)                | 377   | 60.0 | 9.9  | 61.0   | 34.0 | 76.0  | 117   | 64.3 | 9.6  | 66.0   | 28.0 | 76.0  |
|                         | BMI (kg/m <sup>2</sup> ) | 377   | 27.7 | 3.8  | 27.4   | 16.7 | 46.1  | 117   | 27.4 | 4.1  | 26.6   | 19.6 | 39.8  |
|                         | HR (BPM)                 | 360   | 64.2 | 11.4 | 62.5   | 42.1 | 115.4 | 117   | 68.5 | 13.6 | 66.7   | 46.5 | 112.2 |
| <b>Finrisk</b>          | Age (yrs)                | 1,000 | 54.3 | 12.2 | 55.0   | 25.0 | 74.0  | 878   | 57.0 | 12.0 | 59.0   | 25.0 | 74.0  |
|                         | BMI (kg/m <sup>2</sup> ) | 1,000 | 27.2 | 3.9  | 26.7   | 16.2 | 43.0  | 878   | 26.8 | 5.0  | 25.9   | 16.3 | 50.6  |
|                         | HR (BPM)                 | 1,000 | 70.1 | 12.6 | 68.0   | 44.0 | 122.0 | 878   | 71.1 | 11.1 | 70.0   | 44.0 | 116.0 |
| <b>Fusion cases</b>     | Age (yrs)                | 618   | 62.1 | 7.3  | 62.5   | 40.8 | 77.8  | 468   | 63.7 | 7.8  | 64.0   | 45.0 | 83.2  |
|                         | BMI (kg/m <sup>2</sup> ) | 618   | 29.4 | 4.0  | 29.1   | 18.2 | 43.1  | 468   | 31.2 | 5.3  | 30.7   | 16.0 | 47.6  |
|                         | HR (BPM)                 | 618   | 70.5 | 12.9 | 70.0   | 44.0 | 132.0 | 468   | 71.2 | 11.0 | 70.0   | 32.0 | 118.0 |
| <b>Fusion controls</b>  | Age (yrs)                | 571   | 63.4 | 7.6  | 64.0   | 46.0 | 90.9  | 599   | 63.7 | 7.3  | 64.8   | 42.6 | 89.2  |
|                         | BMI (kg/m <sup>2</sup> ) | 571   | 27.0 | 3.5  | 26.8   | 19.2 | 51.1  | 599   | 27.2 | 4.2  | 26.8   | 17.5 | 45.9  |
|                         | HR (BPM)                 | 571   | 64.8 | 12.1 | 64.0   | 40.0 | 168.0 | 599   | 69.5 | 15.2 | 68.0   | 44.0 | 164.0 |
| <b>GOOD</b>             | Age (yrs)                | 938   | 18.9 | 0.6  | 18.8   | 18.0 | 20.1  |       |      |      |        |      |       |
|                         | BMI (kg/m <sup>2</sup> ) | 938   | 22.4 | 3.2  | 21.9   | 16.1 | 41.6  |       |      |      |        |      |       |
|                         | HR (BPM)                 | 938   | 70.1 | 13.5 | 69.0   | 39.0 | 123.0 |       |      |      |        |      |       |
| <b>HAPI</b>             | Age (yrs)                | 451   | 42.2 | 13.5 | 41.0   | 20.0 | 80.0  | 396   | 45.2 | 14.1 | 46.0   | 20.0 | 80.0  |
|                         | BMI (kg/m <sup>2</sup> ) | 451   | 25.6 | 3.2  | 25.3   | 18.4 | 38.0  | 396   | 27.7 | 5.4  | 27.3   | 17.3 | 46.8  |
|                         | HR (BPM)                 | 451   | 61.0 | 8.5  | 61.0   | 40.0 | 96.0  | 396   | 67.0 | 8.9  | 66.0   | 41.0 | 100.0 |

Supplementary Table 3 - continued

| Study                                     | Trait                    | Men   |      |      |        |      |       | Women |      |      |        |      |       |
|-------------------------------------------|--------------------------|-------|------|------|--------|------|-------|-------|------|------|--------|------|-------|
|                                           |                          | N     | mean | SD   | median | min  | max   | N     | mean | SD   | median | min  | max   |
| <b>HBCS</b>                               | Age (yrs)                | 521   | 61.3 | 2.6  | 61.0   | 57.0 | 69.0  | 772   | 61.6 | 3.0  | 61.0   | 57.0 | 69.0  |
|                                           | BMI (kg/m <sup>2</sup> ) | 521   | 27.1 | 3.8  | 26.6   | 18.8 | 41.8  | 772   | 27.4 | 4.9  | 26.6   | 14.8 | 50.1  |
|                                           | HR (BPM)                 | 521   | 69.7 | 11.1 | 68.0   | 50.0 | 100.0 | 772   | 70.6 | 9.5  | 70.0   | 50.0 | 100.0 |
| <b>Health 2000 cases</b>                  | Age (yrs)                | 424   | 49.2 | 10.4 | 49.0   | 30.0 | 75.0  | 446   | 52.4 | 11.7 | 51.0   | 30.0 | 75.0  |
|                                           | BMI (kg/m <sup>2</sup> ) | 424   | 29.5 | 3.6  | 28.9   | 23.2 | 47.1  | 446   | 29.7 | 4.9  | 28.8   | 20.6 | 45.8  |
|                                           | HR (BPM)                 | 424   | 68.2 | 11.3 | 68.0   | 44.0 | 120.0 | 446   | 70.3 | 10.4 | 70.0   | 44.0 | 110.0 |
| <b>Health 2000 controls</b>               | Age (yrs)                | 421   | 49.2 | 10.4 | 49.0   | 30.0 | 75.0  | 446   | 52.0 | 11.6 | 51.0   | 30.0 | 75.0  |
|                                           | BMI (kg/m <sup>2</sup> ) | 421   | 25.4 | 3.2  | 24.9   | 17.1 | 39.0  | 446   | 25.1 | 4.1  | 24.3   | 17.5 | 44.3  |
|                                           | HR (BPM)                 | 421   | 64.5 | 10.8 | 64.0   | 38.0 | 112.0 | 446   | 67.0 | 8.8  | 66.0   | 44.0 | 104.0 |
| <b>Health ABC</b>                         | Age (yrs)                | 874   | 73.9 | 2.9  | 74.0   | 69.0 | 80.0  | 783   | 73.6 | 2.8  | 73.0   | 69.0 | 80.0  |
|                                           | BMI (kg/m <sup>2</sup> ) | 874   | 27.0 | 3.7  | 26.6   | 17.6 | 44.2  | 783   | 26.0 | 4.5  | 25.6   | 15.6 | 44.7  |
|                                           | HR (BPM)                 | 874   | 63.9 | 11.3 | 62.0   | 39.0 | 112.0 | 783   | 65.6 | 9.9  | 65.0   | 38.0 | 102.0 |
| <b>Heritage</b>                           | Age (yrs)                | 245   | 36.6 | 15.0 | 32.0   | 17.0 | 64.3  | 256   | 35.1 | 14.1 | 31.2   | 17.2 | 65.2  |
|                                           | BMI (kg/m <sup>2</sup> ) | 245   | 26.7 | 4.9  | 25.8   | 17.3 | 44.2  | 256   | 25.0 | 4.9  | 23.9   | 17.0 | 47.5  |
|                                           | HR (BPM)                 | 245   | 62.1 | 8.3  | 62.4   | 40.3 | 84.2  | 255   | 66.9 | 8.7  | 67.0   | 44.0 | 105.3 |
| <b>HPFS CHD cases</b>                     | Age (yrs)                | 348   | 62.6 | 8.9  | 63.3   | 45.2 | 79.1  |       |      |      |        |      |       |
|                                           | BMI (kg/m <sup>2</sup> ) | 348   | 25.8 | 3.0  | 25.4   | 18.5 | 38.4  |       |      |      |        |      |       |
|                                           | HR (BPM)                 | 348   | 68.1 | 9.2  | 68.0   | 34.0 | 100.0 |       |      |      |        |      |       |
| <b>HPFS CHD controls</b>                  | Age (yrs)                | 717   | 62.1 | 8.7  | 62.7   | 45.2 | 79.1  |       |      |      |        |      |       |
|                                           | BMI (kg/m <sup>2</sup> ) | 717   | 25.4 | 3.2  | 25.1   | 16.4 | 48.7  |       |      |      |        |      |       |
|                                           | HR (BPM)                 | 717   | 67.7 | 9.8  | 66.0   | 36.0 | 104.0 |       |      |      |        |      |       |
| <b>HPFS Kidney stone disease cases</b>    | Age (yrs)                | 303   | 54.9 | 7.6  | 52.9   | 45.1 | 74.0  |       |      |      |        |      |       |
|                                           | BMI (kg/m <sup>2</sup> ) | 303   | 25.8 | 3.1  | 25.4   | 19.3 | 36.6  |       |      |      |        |      |       |
|                                           | HR (BPM)                 | 303   | 67.3 | 10.1 | 68.0   | 16.0 | 100.0 |       |      |      |        |      |       |
| <b>HPFS Kidney stone disease controls</b> | Age (yrs)                | 227   | 53.8 | 6.0  | 52.4   | 45.2 | 71.2  |       |      |      |        |      |       |
|                                           | BMI (kg/m <sup>2</sup> ) | 227   | 25.9 | 3.0  | 25.5   | 19.5 | 37.1  |       |      |      |        |      |       |
|                                           | HR (BPM)                 | 227   | 67.9 | 10.5 | 67.0   | 45.0 | 120.0 |       |      |      |        |      |       |
| <b>HPFS t2d cases</b>                     | Age (yrs)                | 1,074 | 61.0 | 8.6  | 61.6   | 45.2 | 79.1  |       |      |      |        |      |       |
|                                           | BMI (kg/m <sup>2</sup> ) | 1,074 | 27.9 | 4.3  | 27.3   | 16.3 | 56.5  |       |      |      |        |      |       |
|                                           | HR (BPM)                 | 1,074 | 70.3 | 10.8 | 70.0   | 35.0 | 165.0 |       |      |      |        |      |       |
| <b>HPFS t2d controls</b>                  | Age (yrs)                | 1,197 | 60.9 | 8.2  | 61.4   | 45.2 | 79.0  |       |      |      |        |      |       |
|                                           | BMI (kg/m <sup>2</sup> ) | 1,197 | 25.4 | 2.9  | 25.1   | 16.5 | 39.6  |       |      |      |        |      |       |
|                                           | HR (BPM)                 | 1,197 | 67.1 | 10.1 | 66.0   | 29.0 | 170.0 |       |      |      |        |      |       |
| <b>Hypergenes cases</b>                   | Age (yrs)                | 1,004 | 48.9 | 10.1 | 49.0   | 18.0 | 84.0  | 514   | 48.3 | 8.8  | 48.5   | 23.0 | 93.0  |
|                                           | BMI (kg/m <sup>2</sup> ) | 1,004 | 27.5 | 3.5  | 27.1   | 16.0 | 47.4  | 514   | 26.9 | 5.0  | 26.4   | 16.8 | 46.3  |
|                                           | HR (BPM)                 | 1,004 | 74.8 | 9.2  | 75.0   | 50.0 | 100.0 | 514   | 74.7 | 9.3  | 75.5   | 51.0 | 100.0 |

**Supplementary Table 3 - continued**

| Study                      | Trait                    | Men   |      |      |        |      |       | Women |      |      |        |      |       |
|----------------------------|--------------------------|-------|------|------|--------|------|-------|-------|------|------|--------|------|-------|
|                            |                          | N     | mean | SD   | median | min  | max   | N     | mean | SD   | median | min  | max   |
| <b>Hypergenes controls</b> | Age (yrs)                | 976   | 60.2 | 8.7  | 58.0   | 28.0 | 98.0  | 652   | 61.9 | 8.9  | 59.0   | 50.0 | 97.0  |
|                            | BMI (kg/m <sup>2</sup> ) | 976   | 26.0 | 3.4  | 25.6   | 14.7 | 43.2  | 652   | 25.1 | 4.1  | 24.6   | 16.5 | 46.7  |
|                            | HR (BPM)                 | 976   | 72.6 | 8.1  | 72.0   | 50.0 | 100.0 | 652   | 72.7 | 7.9  | 72.0   | 50.0 | 94.0  |
| <b>Inchianti</b>           | Age (yrs)                | 507   | 66.5 | 15.3 | 70.0   | 23.0 | 94.0  | 622   | 68.2 | 15.1 | 71.0   | 21.0 | 95.0  |
|                            | BMI (kg/m <sup>2</sup> ) | 507   | 27.0 | 3.4  | 27.0   | 18.1 | 37.4  | 622   | 27.3 | 4.7  | 27.0   | 18.0 | 46.6  |
|                            | HR (BPM)                 | 507   | 67.0 | 12.3 | 65.0   | 40.0 | 120.0 | 622   | 72.0 | 11.3 | 71.0   | 45.0 | 120.0 |
| <b>Korcula</b>             | Age (yrs)                | 127   | 55.7 | 13.8 | 57.0   | 20.0 | 88.0  | 226   | 53.5 | 23.4 | 54.0   | 18.0 | 84.0  |
|                            | BMI (kg/m <sup>2</sup> ) | 127   | 28.7 | 3.6  | 28.6   | 19.3 | 38.3  | 226   | 27.6 | 4.5  | 27.4   | 18.4 | 53.8  |
|                            | HR (BPM)                 | 127   | 65.0 | 10.7 | 63.0   | 51.0 | 99.0  | 226   | 67.0 | 8.9  | 67.0   | 51.0 | 99.0  |
| <b>LifeLines</b>           | Age (yrs)                | 1,371 | 56.2 | 9.6  | 54.0   | 21.9 | 87.6  | 1,992 | 54.8 | 10.0 | 52.0   | 23.3 | 89.0  |
|                            | BMI (kg/m <sup>2</sup> ) | 1,371 | 27.0 | 3.6  | 26.4   | 17.0 | 48.9  | 1,992 | 26.5 | 4.6  | 25.7   | 15.2 | 51.0  |
|                            | HR (BPM)                 | 1,371 | 66.9 | 11.4 | 66.0   | 38.0 | 146.0 | 1,992 | 69.6 | 11.3 | 68.0   | 40.0 | 128.0 |
| <b>Lolipop cohort</b>      | Age (yrs)                | 1,869 | 48.3 | 10.5 | 46.9   | 35.0 | 74.9  |       |      |      |        |      |       |
|                            | BMI (kg/m <sup>2</sup> ) | 1,869 | 26.8 | 4.2  | 26.5   | 14.8 | 48.3  |       |      |      |        |      |       |
|                            | HR (BPM)                 | 1,869 | 68.9 | 11.5 | 68.0   | 39.0 | 143.0 |       |      |      |        |      |       |
| <b>Lolipop cases</b>       | Age (yrs)                | 1,062 | 61.8 | 9.8  | 63.0   | 26.7 | 82.4  | 386   | 61.8 | 9.0  | 62.9   | 32.3 | 78.4  |
|                            | BMI (kg/m <sup>2</sup> ) | 1,062 | 27.4 | 4.1  | 27.0   | 16.8 | 45.8  | 386   | 29.9 | 5.7  | 29.2   | 17.2 | 51.0  |
|                            | HR (BPM)                 | 1,062 | 65.8 | 11.7 | 65.0   | 38.0 | 123.0 | 386   | 68.1 | 11.5 | 67.0   | 37.0 | 108.0 |
| <b>Lolipop controls</b>    | Age (yrs)                | 2,663 | 55.0 | 9.9  | 54.0   | 32.1 | 81.0  | 588   | 53.6 | 9.3  | 54.3   | 35.2 | 78.3  |
|                            | BMI (kg/m <sup>2</sup> ) | 2,663 | 26.9 | 3.9  | 26.6   | 15.2 | 49.2  | 588   | 28.0 | 4.9  | 27.4   | 17.0 | 48.0  |
|                            | HR (BPM)                 | 2,663 | 68.4 | 11.2 | 67.0   | 32.0 | 152.0 | 588   | 70.4 | 10.5 | 69.0   | 47.0 | 112.0 |
| <b>NBS</b>                 | Age (yrs)                | 269   | 65.3 | 4.3  | 65.5   | 51.8 | 72.0  | 282   | 60.4 | 5.3  | 60.3   | 50.5 | 71.1  |
|                            | BMI (kg/m <sup>2</sup> ) | 269   | 27.1 | 3.5  | 26.6   | 20.0 | 43.9  | 282   | 26.7 | 4.3  | 26.1   | 19.1 | 45.7  |
|                            | HR (BPM)                 | 269   | 63.9 | 10.2 | 63.0   | 40.0 | 103.0 | 282   | 66.1 | 10.4 | 65.0   | 39.0 | 121.0 |
| <b>NFBC-1966</b>           | Age (yrs)                | 2,242 | 31.2 | 0.4  | 31.0   | 31.0 | 31.0  | 2,337 | 31.2 | 0.4  | 31.0   | 31.0 | 31.0  |
|                            | BMI (kg/m <sup>2</sup> ) | 2,242 | 25.2 | 3.6  | 24.9   | 15.3 | 47.6  | 2,337 | 24.2 | 4.7  | 23.1   | 15.4 | 54.4  |
|                            | HR (BPM)                 | 2,242 | 67.4 | 10.4 | 66.0   | 40.0 | 124.0 | 2,337 | 71.4 | 10.3 | 70.0   | 38.0 | 118.0 |
| <b>NHS Cancer cases</b>    | Age (yrs)                |       |      |      |        |      |       | 965   | 58.7 | 6.4  | 59.2   | 43.6 | 69.9  |
|                            | BMI (kg/m <sup>2</sup> ) |       |      |      |        |      |       | 965   | 25.4 | 4.5  | 24.6   | 17.0 | 53.5  |
|                            | HR (BPM)                 |       |      |      |        |      |       | 965   | 71.8 | 8.3  | 72.0   | 57.0 | 94.5  |
| <b>NHS Cancer controls</b> | Age (yrs)                |       |      |      |        |      |       | 924   | 59.0 | 6.4  | 59.5   | 43.8 | 69.4  |
|                            | BMI (kg/m <sup>2</sup> ) |       |      |      |        |      |       | 924   | 25.2 | 4.5  | 24.2   | 15.2 | 48.1  |
|                            | HR (BPM)                 |       |      |      |        |      |       | 924   | 71.6 | 8.7  | 72.0   | 57.0 | 94.5  |
| <b>NHS CHD cases</b>       | Age (yrs)                |       |      |      |        |      |       | 297   | 60.3 | 6.4  | 61.9   | 43.9 | 69.6  |
|                            | BMI (kg/m <sup>2</sup> ) |       |      |      |        |      |       | 297   | 25.7 | 2.0  | 24.9   | 15.5 | 52.7  |
|                            | HR (BPM)                 |       |      |      |        |      |       | 297   | 74.2 | 8.7  | 72.0   | 57.0 | 94.5  |

Supplementary Table 3 - continued

| Study                             | Trait                    | Men   |      |      |        |      |       | Women |      |      |        |      |       |
|-----------------------------------|--------------------------|-------|------|------|--------|------|-------|-------|------|------|--------|------|-------|
|                                   |                          | N     | mean | SD   | median | min  | max   | N     | mean | SD   | median | min  | max   |
| NHS CHD controls                  | Age (yrs)                |       |      |      |        |      |       | 723   | 60.2 | 6.4  | 62.0   | 43.6 | 69.6  |
|                                   | BMI (kg/m <sup>2</sup> ) |       |      |      |        |      |       | 723   | 24.9 | 4.2  | 24.0   | 17.2 | 44.4  |
|                                   | HR (BPM)                 |       |      |      |        |      |       | 723   | 72.2 | 8.5  | 72.0   | 57.0 | 94.5  |
| NHS Kidney stone disease cases    | Age (yrs)                |       |      |      |        |      |       | 301   | 55.5 | 7.0  | 54.5   | 43.5 | 69.4  |
|                                   | BMI (kg/m <sup>2</sup> ) |       |      |      |        |      |       | 301   | 25.8 | 4.8  | 25.1   | 16.1 | 46.8  |
|                                   | HR (BPM)                 |       |      |      |        |      |       | 301   | 72.9 | 8.2  | 72.0   | 57.0 | 94.5  |
| NHS Kidney stone disease controls | Age (yrs)                |       |      |      |        |      |       | 156   | 53.7 | 5.6  | 53.1   | 43.6 | 69.2  |
|                                   | BMI (kg/m <sup>2</sup> ) |       |      |      |        |      |       | 156   | 23.9 | 3.9  | 23.0   | 18.3 | 41.2  |
|                                   | HR (BPM)                 |       |      |      |        |      |       | 156   | 71.3 | 8.7  | 72.0   | 57.0 | 94.5  |
| NHS t2d cases                     | Age (yrs)                |       |      |      |        |      |       | 1,319 | 58.0 | 6.7  | 58.6   | 43.5 | 69.7  |
|                                   | BMI (kg/m <sup>2</sup> ) |       |      |      |        |      |       | 1,319 | 30.1 | 5.8  | 29.6   | 17.2 | 54.9  |
|                                   | HR (BPM)                 |       |      |      |        |      |       | 1,319 | 74.2 | 9.0  | 72.0   | 57.0 | 94.5  |
| NHS t2d controls                  | Age (yrs)                |       |      |      |        |      |       | 1,559 | 57.6 | 6.7  | 58.0   | 43.5 | 70.1  |
|                                   | BMI (kg/m <sup>2</sup> ) |       |      |      |        |      |       | 1,559 | 25.5 | 4.9  | 25.5   | 15.0 | 53.2  |
|                                   | HR (BPM)                 |       |      |      |        |      |       | 1,559 | 72.0 | 8.4  | 72.0   | 57.0 | 94.5  |
| NSPHS                             | Age (yrs)                | 278   | 50.6 | 19.3 | 49.0   | 18.0 | 87.0  | 313   | 49.4 | 19.4 | 48.0   | 18.0 | 91.0  |
|                                   | BMI (kg/m <sup>2</sup> ) | 278   | 27.2 | 4.4  | 26.5   | 18.4 | 46.5  | 313   | 26.4 | 5.0  | 25.5   | 17.1 | 46.7  |
|                                   | HR (BPM)                 | 278   | 72.6 | 5.6  | 70.0   | 60.0 | 84.0  | 313   | 72.4 | 5.6  | 70.0   | 60.0 | 82.0  |
| Prevend                           | Age (yrs)                | 1,943 | 50.9 | 12.7 | 50.0   | 28.0 | 75.0  | 1,848 | 48.1 | 12.0 | 47.0   | 28.0 | 75.0  |
|                                   | BMI (kg/m <sup>2</sup> ) | 1,943 | 26.4 | 3.7  | 26.0   | 17.2 | 44.7  | 1,848 | 25.9 | 4.8  | 25.0   | 17.1 | 53.7  |
|                                   | HR (BPM)                 | 1,943 | 67.2 | 12.3 | 65.0   | 33.0 | 146.0 | 1,848 | 70.7 | 12.4 | 70.0   | 43.0 | 176.0 |
| Split                             | Age (yrs)                | 148   | 49.9 | 16.3 | 52.0   | 19.0 | 85.0  | 248   | 50.1 | 14.0 | 51.5   | 18.0 | 81.0  |
|                                   | BMI (kg/m <sup>2</sup> ) | 148   | 28.1 | 3.8  | 27.4   | 20.8 | 43.4  | 248   | 26.3 | 4.4  | 25.7   | 18.2 | 43.4  |
|                                   | HR (BPM)                 | 148   | 65.9 | 10.8 | 64.0   | 51.0 | 98.0  | 248   | 66.2 | 9.1  | 65.0   | 51.0 | 98.0  |
| YFS                               | Age (yrs)                | 941   | 31.7 | 5.0  | 33.0   | 24.0 | 39.0  | 1,142 | 31.7 | 5.0  | 33.0   | 24.0 | 39.0  |
|                                   | BMI (kg/m <sup>2</sup> ) | 941   | 25.8 | 4.1  | 25.2   | 15.7 | 47.8  | 1,142 | 24.5 | 4.6  | 23.5   | 15.7 | 47.2  |
|                                   | HR (BPM)                 | 941   | 65.1 | 9.1  | 64.7   | 41.3 | 105.3 | 1,142 | 68.2 | 8.6  | 67.3   | 46.0 | 109.3 |

Supplementary Table 4 - Sensitivity analyses for meta-analysis of stage 1 results

Table with 15 columns: SNP, Chr, Pos, and six columns under Primary analyses (No exclusions, Individuals with hypertension excluded, Individuals with type 2 diabetes excluded, Individuals with cancer, kidney stones and obesity excluded, Individuals of Indian Asian ancestry excluded, 12-yr old children excluded), and six columns under Secondary analyses (No exclusions, Individuals with hypertension excluded, Individuals with type 2 diabetes excluded, Individuals with cancer, kidney stones and obesity excluded, Individuals of Indian Asian ancestry excluded, 12-yr old children excluded). The table contains 48 rows of SNP data with corresponding p-values.

a Primary analyses, no a priori exclusions applied in individual GWAS; b Secondary analyses, a priori exclusion of individuals 1) with prevalent myocardial infarction, heart failure, atrial fibrillation or 2nd / 3rd degree atrio-ventricular block; 2) who used heart rate altering medication at the time of the study, defined as the use of beta-blockers, non-dihydropyridine calcium antagonists or digoxin; 3) with a resting heart rate lower than 50 beats/min or higher than 100 beats/min applied in each individual GWAS (n ~19,500); c Exclusion of hypertensive cases, i.e. Advance cases, ASCOT cases, Bright cases, Corogene cases, Fingesture cases, HPFS CHD cases, Lollip cases, NHS cases (N = 11,772); d Additional exclusion of type 2 diabetes cases, i.e. DGI cases, Fusion cases, HPFS t2d cases, NHS t2d cases (N = 4,714); e Additional exclusion of cases with other diseases, i.e. Health2000 cases (obesity), HPFS kidney cases (kidney stones), NHS kidney cases, NHC cancer cases (N = 2,439); f Additional exclusion of individuals of Indian Asian descent, i.e. Lollipop cohort, Lollipop controls (N = 5,120); g Additional exclusion of 120yr old children, i.e. ALSPAC (N = 1,486)

Note: all exclusions are cumulative, resulting in samples of ~66,800 individuals for the primary analysis and ~58,000 for the secondary analysis after incorporating the maximal number of exclusions. SNPs were ordered by p-value in the primary analysis with no exclusions

**Supplementary Table 5 – The 42 loci associated with heart rate at  $p < 3 \times 10^{-5}$  at stage 1, which were taken forward to stage 2**

| Nearest gene     | lead SNP   | Chr | Position (bp) | Alleles |       |       | Stage 1 |     |                        | Stage 2 |     |                        | Heterogeneity  |         | Stage 1 + 2 |   |                        |
|------------------|------------|-----|---------------|---------|-------|-------|---------|-----|------------------------|---------|-----|------------------------|----------------|---------|-------------|---|------------------------|
|                  |            |     |               | Effect  | Other | EAf   | N       | dir | p-value                | N       | dir | p-value                | I <sup>2</sup> | p-value | Q-statistic | N | dir                    |
| <i>MYH6</i>      | rs365990   | 14  | 22,931,651    | g       | a     | 0.343 | 90,433  | +   | 1.85x10 <sup>-25</sup> | 58,539  | +   | 2.19x10 <sup>-21</sup> | 0              | 0.88    | 148,972     | + | 5.39x10 <sup>-45</sup> |
| <i>GJA1</i>      | rs1015451  | 6   | 122,173,184   | c       | t     | 0.110 | 92,355  | +   | 3.96x10 <sup>-18</sup> | 62,948  | +   | 2.14x10 <sup>-17</sup> | 21             | 0.10    | 155,303     | + | 1.14x10 <sup>-33</sup> |
| <i>KIAA1755</i>  | rs6127471  | 20  | 36,277,452    | c       | t     | 0.543 | 88,545  | +   | 6.52x10 <sup>-21</sup> | 74,048  | +   | 2.98x10 <sup>-10</sup> | 29             | 0.03    | 162,593     | + | 5.22x10 <sup>-29</sup> |
| <i>ACHE</i>      | rs13245899 | 7   | 100,335,067   | g       | a     | 0.198 | 90,451  | +   | 3.36x10 <sup>-14</sup> | 86,192  | +   | 3.27x10 <sup>-14</sup> | 0              | 0.61    | 176,643     | + | 7.67x10 <sup>-27</sup> |
| <i>CCDC141</i>   | rs17362588 | 2   | 179,429,291   | a       | g     | 0.116 | 82,115  | +   | 1.27x10 <sup>-16</sup> | 53,946  | +   | 4.22x10 <sup>-11</sup> | 18             | 0.14    | 136,061     | + | 3.57x10 <sup>-26</sup> |
| <i>CD46</i>      | rs11118555 | 1   | 206,007,476   | a       | t     | 0.129 | 83,533  | +   | 6.94x10 <sup>-13</sup> | 83,121  | +   | 7.49x10 <sup>-15</sup> | 21             | 0.08    | 166,654     | + | 3.88x10 <sup>-26</sup> |
| <i>SYT10</i>     | rs7980799  | 12  | 33,468,257    | a       | c     | 0.402 | 85,489  | +   | 1.19x10 <sup>-12</sup> | 80,554  | +   | 7.87x10 <sup>-13</sup> | 2              | 0.34    | 166,043     | + | 6.22x10 <sup>-24</sup> |
| <i>FADS1</i>     | rs174549   | 11  | 61,327,958    | a       | g     | 0.318 | 87,843  | +   | 1.32x10 <sup>-11</sup> | 85,004  | +   | 1.57x10 <sup>-12</sup> | 0              | 0.69    | 172,847     | + | 1.38x10 <sup>-22</sup> |
| <i>SLC35F1</i>   | rs11153730 | 6   | 118,774,215   | t       | c     | 0.515 | 90,411  | +   | 1.33x10 <sup>-13</sup> | 66,372  | +   | 8.79x10 <sup>-09</sup> | 21             | 0.10    | 156,783     | + | 7.55x10 <sup>-21</sup> |
| <i>LINC00477</i> | rs17287293 | 12  | 24,662,145    | a       | g     | 0.849 | 92,354  | +   | 6.84x10 <sup>-11</sup> | 58,731  | +   | 3.98x10 <sup>-11</sup> | 1              | 0.33    | 151,085     | + | 3.07x10 <sup>-20</sup> |
| <i>HCN4</i>      | rs4489968  | 15  | 71,452,559    | t       | g     | 0.833 | 92,292  | +   | 1.65x10 <sup>-13</sup> | 68,566  | +   | 3.34x10 <sup>-08</sup> | 0              | 0.38    | 160,858     | + | 3.82x10 <sup>-20</sup> |
| <i>GNB4</i>      | rs7612445  | 3   | 180,655,673   | g       | t     | 0.815 | 86,602  | +   | 9.03x10 <sup>-07</sup> | 53,793  | +   | 7.78x10 <sup>-10</sup> | 16             | 0.16    | 140,395     | + | 1.86x10 <sup>-14</sup> |
| <i>FLRT2</i>     | rs17796783 | 14  | 84,879,664    | t       | c     | 0.722 | 91,881  | +   | 9.84x10 <sup>-09</sup> | 53,954  | +   | 5.76x10 <sup>-06</sup> | 22             | 0.10    | 145,835     | + | 2.69x10 <sup>-13</sup> |
| <i>CHRM2</i>     | rs2350782  | 7   | 136,293,174   | c       | t     | 0.128 | 81,895  | +   | 6.13x10 <sup>-07</sup> | 49,886  | +   | 2.63x10 <sup>-07</sup> | 8              | 0.24    | 131,781     | + | 1.26x10 <sup>-12</sup> |
| <i>NKX2-5</i>    | rs6882776  | 5   | 172,596,769   | g       | a     | 0.660 | 85,491  | +   | 2.58x10 <sup>-05</sup> | 73,316  | +   | 7.43x10 <sup>-09</sup> | 0              | 0.45    | 158,807     | + | 2.29x10 <sup>-12</sup> |
| <i>GNG11</i>     | rs180242   | 7   | 93,387,532    | t       | a     | 0.334 | 76,281  | +   | 2.54x10 <sup>-06</sup> | 71,830  | +   | 5.59x10 <sup>-07</sup> | 25             | 0.05    | 148,111     | + | 6.78x10 <sup>-12</sup> |
| <i>B3GNT7</i>    | rs13030174 | 2   | 231,979,528   | a       | c     | 0.726 | 86,646  | +   | 5.60x10 <sup>-08</sup> | 58,164  | +   | 3.66x10 <sup>-04</sup> | 0              | 0.84    | 144,810     | + | 1.04x10 <sup>-10</sup> |
| <i>FNDC3B</i>    | rs9647379  | 3   | 173,267,862   | c       | g     | 0.401 | 90,439  | +   | 9.63x10 <sup>-07</sup> | 46,875  | +   | 3.07x10 <sup>-04</sup> | 1              | 0.34    | 137,314     | + | 1.17x10 <sup>-09</sup> |
| <i>RFX4</i>      | rs2067615  | 12  | 105,673,552   | a       | t     | 0.492 | 92,334  | +   | 4.24x10 <sup>-07</sup> | 58,863  | +   | 8.49x10 <sup>-04</sup> | 16             | 0.16    | 151,197     | + | 1.58x10 <sup>-09</sup> |
| <i>CPNE8</i>     | rs826838   | 12  | 37,392,998    | c       | t     | 0.448 | 91,151  | +   | 1.21x10 <sup>-06</sup> | 75,481  | +   | 6.20x10 <sup>-04</sup> | 0              | 0.84    | 166,632     | + | 3.73x10 <sup>-09</sup> |
| <i>TFPI</i>      | rs4140885  | 2   | 188,041,309   | a       | g     | 0.317 | 84,398  | +   | 5.75x10 <sup>-06</sup> | 85,997  | +   | 1.40x10 <sup>-03</sup> | 20             | 0.08    | 170,395     | + | 4.72x10 <sup>-08</sup> |
| <i>A2BP1</i>     | rs11645781 | 16  | 6,836,129     | g       | a     | 0.696 | 90,389  | +   | 1.03x10 <sup>-05</sup> | 55,271  | +   | 4.33x10 <sup>-03</sup> | 4              | 0.29    | 145,660     | + | 1.66x10 <sup>-07</sup> |
| <i>MYOT</i>      | rs7722600  | 5   | 137,222,661   | a       | g     | 0.815 | 92,348  | +   | 9.55x10 <sup>-06</sup> | 88,823  | +   | 4.65x10 <sup>-03</sup> | 0              | 0.56    | 181,171     | + | 2.68x10 <sup>-07</sup> |
| <i>PDE11A</i>    | rs13413635 | 2   | 178,388,677   | g       | a     | 0.033 | 77,314  | +   | 1.06x10 <sup>-06</sup> | 38,468  | +   | 0.05                   | 0              | 0.57    | 115,782     | + | 3.40x10 <sup>-07</sup> |
| <i>PPP1CC</i>    | rs11065706 | 12  | 109,639,914   | t       | c     | 0.756 | 81,930  | +   | 6.97x10 <sup>-06</sup> | 61,237  | +   | 0.01                   | 0              | 0.42    | 143,167     | + | 5.90x10 <sup>-07</sup> |
| <i>CPNE5</i>     | rs236373   | 6   | 36,900,035    | c       | t     | 0.727 | 88,545  | +   | 1.80x10 <sup>-05</sup> | 59,151  | +   | 0.01                   | 0              | 0.65    | 147,696     | + | 9.04x10 <sup>-07</sup> |
| <i>ACTN4</i>     | rs11083475 | 19  | 43,879,952    | g       | a     | 0.537 | 92,318  | +   | 1.60x10 <sup>-05</sup> | 64,113  | +   | 0.03                   | 0              | 0.61    | 156,431     | + | 2.46x10 <sup>-06</sup> |
| <i>SLC10A7</i>   | rs10213084 | 4   | 147,718,788   | g       | t     | 0.869 | 90,454  | +   | 3.84x10 <sup>-06</sup> | 77,906  | +   | 0.07                   | 0              | 0.64    | 168,360     | + | 3.77x10 <sup>-06</sup> |
| <i>DCP1A</i>     | rs2029213  | 3   | 53,353,285    | c       | t     | 0.639 | 92,309  | +   | 7.85x10 <sup>-08</sup> | 79,964  | +   | 0.43                   | 34             | 0.01    | 172,273     | + | 7.45x10 <sup>-06</sup> |
| <i>CMYA5</i>     | rs10942901 | 5   | 79,060,913    | g       | a     | 0.138 | 86,667  | +   | 1.74x10 <sup>-05</sup> | 54,695  | +   | 0.14                   | 0              | 0.34    | 141,362     | + | 1.78x10 <sup>-05</sup> |
| <i>UHRF1BP1</i>  | rs1555773  | 6   | 34,866,111    | c       | g     | 0.822 | 85,792  | +   | 6.84x10 <sup>-06</sup> | 56,730  | +   | 0.25                   | 22             | 0.01    | 142,522     | + | 2.42x10 <sup>-05</sup> |
| <i>KLF14</i>     | rs205712   | 7   | 130,263,348   | g       | c     | 0.114 | 75,283  | +   | 1.82x10 <sup>-05</sup> | 54,332  | +   | 0.20                   | 0              | 0.43    | 129,615     | + | 4.10x10 <sup>-05</sup> |
| <i>DNAJC19</i>   | rs2718767  | 3   | 182,392,734   | t       | g     | 0.146 | 92,320  | +   | 8.95x10 <sup>-06</sup> | 64,424  | +   | 0.29                   | 21             | 0.11    | 156,744     | + | 4.24x10 <sup>-05</sup> |
| <i>TCF21</i>     | rs4896011  | 6   | 134,256,446   | t       | a     | 0.913 | 90,430  | +   | 5.65x10 <sup>-06</sup> | 60,502  | +   | 0.39                   | 11             | 0.21    | 150,932     | + | 4.90x10 <sup>-05</sup> |
| <i>HSD17B12</i>  | rs7110523  | 11  | 43,706,952    | a       | g     | 0.082 | 76,460  | +   | 2.57x10 <sup>-06</sup> | 46,545  | +   | 0.63                   | 0              | 0.49    | 123,005     | + | 6.12x10 <sup>-05</sup> |
| <i>NPBWR2</i>    | rs910883   | 20  | 62,210,011    | g       | a     | 0.918 | 90,487  | +   | 2.28x10 <sup>-06</sup> | 53,312  | +   | 0.79                   | 0              | 0.58    | 143,799     | + | 9.02x10 <sup>-05</sup> |
| <i>MANEA</i>     | rs10806489 | 6   | 95,409,563    | c       | t     | 0.021 | 81,250  | +   | 1.24x10 <sup>-05</sup> | 46,552  | +   | 0.55                   | 16             | 0.16    | 127,802     | + | 1.19x10 <sup>-04</sup> |
| <i>FAM19A2</i>   | rs17715440 | 12  | 60,866,046    | t       | c     | 0.106 | 86,381  | +   | 7.85x10 <sup>-06</sup> | 81,089  | +   | 0.51                   | 25             | 0.05    | 167,470     | + | 2.39x10 <sup>-04</sup> |
| <i>ST6GAL2</i>   | rs4384785  | 2   | 106,488,398   | a       | g     | 0.099 | 79,925  | +   | 3.13x10 <sup>-06</sup> | 42,473  | -   | 0.83                   | 35             | 0.03    | 122,398     | + | 2.67x10 <sup>-04</sup> |

**Supplementary Table 5 – continued**

| Nearest gene  | lead SNP   | Chr | Position (bp) | Alleles |       | EAF   | N      | Stage 1 |                        | N      | Stage 2 |         | Heterogeneity  |                        | Stage 1 + 2 |   |                        |
|---------------|------------|-----|---------------|---------|-------|-------|--------|---------|------------------------|--------|---------|---------|----------------|------------------------|-------------|---|------------------------|
|               |            |     |               | Effect  | Other |       |        | dir     | p-value                |        | dir     | p-value | I <sup>2</sup> | p-value                | Q-statistic | N | dir                    |
| <i>FRMPD1</i> | rs12345385 | 9   | 37,739,508    | g       | a     | 0.278 | 90,045 | +       | 1.61x10 <sup>-06</sup> | 53,221 | -       | 0.59    | 5              | 0.28                   | 143,266     | + | 5.00x10 <sup>-04</sup> |
| <i>CLCNKA</i> | rs1889785  | 1   | 16,221,316    | a       | g     | 0.457 | 90,056 | +       | 4.45x10 <sup>-06</sup> | 57,019 | -       | 0.20    | 22             | 0.09                   | 147,075     | + | 5.24x10 <sup>-03</sup> |
| <i>CDH22</i>  | rs2425787  | 20  | 44,280,798    | g       | a     | 0.075 | 91,958 | +       | 9.09x10 <sup>-06</sup> | 57,699 | -       | 0.18    | 44             | 5.78x10 <sup>-03</sup> | 149,657     | + | 7.80x10 <sup>-03</sup> |

dir, direction of association with heart rate for effect allele, increasing (+) or decreasing (-); *P*-value for association between SNP and heart rate after adjusting for sex, age, age<sup>2</sup> and BMI, and adjusted for population stratification (GC) on a per study level and after meta-analysis ( $\lambda = 1.106$ ); heterogeneity statistics are for results of meta-analysis stage 1 and samples of stage 2; I<sup>2</sup>, proportion of variance that is due to true heterogeneity in effect size.



**Supplementary Table 6 – Conditional analyses using meta-analysis of stage 1 results**

| Locus | nearest gene | SNP        | Position (bp) | Alleles |       | Freq  | p 1                    | p <sub>adj</sub> 1     | p 1 + 2                | beta <sub>adj</sub> 1 + 2 | SE <sub>adj</sub> 1 + 2 | p <sub>adj</sub> 1 + 2 | r <sup>2</sup> LD |
|-------|--------------|------------|---------------|---------|-------|-------|------------------------|------------------------|------------------------|---------------------------|-------------------------|------------------------|-------------------|
|       |              |            |               | Effect  | Other |       |                        |                        |                        |                           |                         |                        |                   |
| 2     | <i>GJA1</i>  | rs1015451  | 122,173,184   | c       | t     | 0.110 | 3.96x10 <sup>-18</sup> | 8.73x10 <sup>-15</sup> | 1.82x10 <sup>-21</sup> | 0.61                      | 0.07                    | 3.73x10 <sup>-17</sup> | -                 |
|       | <i>GJA1</i>  | rs11154027 | 121,823,089   | c       | t     | 0.567 | 2.75x10 <sup>-13</sup> | 7.24x10 <sup>-10</sup> | 9.00x10 <sup>-16</sup> | 0.32                      | 0.05                    | 7.03x10 <sup>-12</sup> | 0.04              |
|       | <i>GJA1</i>  | rs17083533 | 121,772,421   | a       | g     | 0.077 | 2.10x10 <sup>-12</sup> | 2.54x10 <sup>-8</sup>  | 2.57x10 <sup>-13</sup> | 0.74                      | 0.13                    | 1.00x10 <sup>-08</sup> | 0.11              |
| 4     | <i>CD46</i>  | rs11118555 | 206,007,476   | a       | t     | 0.129 | 6.94x10 <sup>-13</sup> | 8.84x10 <sup>-9</sup>  | 9.39x10 <sup>-21</sup> | 0.51                      | 0.06                    | 2.56x10 <sup>-15</sup> | -                 |
|       | <i>CD34</i>  | rs11578508 | 206,195,688   | a       | g     | 0.665 | 2.31x10 <sup>-13</sup> | 1.66x10 <sup>-9</sup>  | 1.40x10 <sup>-15</sup> | 0.30                      | 0.05                    | 4.04x10 <sup>-10</sup> | 0.21              |

Results from conditional analyses using summary statistics of meta-analyses. p 1, p-value for association with heart rate after meta-analysis of stage 1 results; p<sub>adj</sub> 1, p-value for association with heart rate after conditioning on the other heart rate association(s) shown in the table; p 1+2, p-value for association with heart rate after combined meta-analysis of stage 1 + 2 results (including data from studies with heart rate as the dependent variable only, i.e. excluding data from the RRgen consortium and the ERF study); beta, SE and p<sub>adj</sub> 1+2, beta, SE and p-values for association with heart rate after combined meta-analysis of stage 1 and 2 results and after conditioning on the other heart rate association(s) shown in the table; r<sup>2</sup> LD, r<sup>2</sup> for LD with the lead SNP.

**Supplementary Table 7 - Study design, number of individuals and sample quality control of studies in stage 2 - *in silico* replication using data from studies with data from GWAS, Metabochip and Cardiochip**

| Study                                                       |                                                                                                                        |                               |                       |                        | Sample QC                                                                                                                                                                                                      |                                      |                       |                                                                                                                                                                                          |
|-------------------------------------------------------------|------------------------------------------------------------------------------------------------------------------------|-------------------------------|-----------------------|------------------------|----------------------------------------------------------------------------------------------------------------------------------------------------------------------------------------------------------------|--------------------------------------|-----------------------|------------------------------------------------------------------------------------------------------------------------------------------------------------------------------------------|
| Short name                                                  | Full name                                                                                                              | Study design                  | Total sample size (N) | Call rate <sup>a</sup> | Sample specific QC criteria                                                                                                                                                                                    | Samples in analysis (N) <sup>b</sup> | HR assessment method  | References                                                                                                                                                                               |
| <b><i>In silico</i> follow-up studies: Genome-wide data</b> |                                                                                                                        |                               |                       |                        |                                                                                                                                                                                                                |                                      |                       |                                                                                                                                                                                          |
| ALSPAC 12-yr old children                                   | Avon Longitudinal Study of Parents And Children Replication                                                            | Population-based              | 9,545                 | >95%                   | Samples not clustering with CEU in multidimensional scaling; Putatively related individuals; Individuals with missingness > 3%; Individuals with unusual heterozygosities; Individuals with sex discrepancies; | 4,000                                | Peripheral pulse rate | [PMID 19181680]                                                                                                                                                                          |
| ACTS                                                        | Alcohol Challenge Twin Study                                                                                           | Population-based twin study   | 357                   | >97%                   | Ethnic outliers (non-European ancestry) (n=8)                                                                                                                                                                  | 349                                  | Peripheral pulse rate | [PMID 4041178]                                                                                                                                                                           |
| DESIR <sup>c</sup>                                          | Data from an Epidemiological Study on the Insulin Resistance Syndrom                                                   | General population            | 4,993                 | >98%                   | Call rate > 95%                                                                                                                                                                                                | 4,402                                | Peripheral pulse rate | [PMID 17293876]                                                                                                                                                                          |
| EGCUT                                                       | Estonian Genome Center, University of Tartu                                                                            | Population-based              | 893                   | 98.0%                  | Individuals with call-rate > 98%; Individuals with cryptic relatedness; Genetic outliers from PC analyses                                                                                                      | 771                                  | Peripheral pulse rate | [PMID 19424496] Metspalu, A. The Estonian Genome Project. Drug Development Research 62, 97-101 (2004)                                                                                    |
| ERF                                                         | Erasmus Rucphen Study                                                                                                  | Population-based family study | 2,834                 | 98%                    | RRgen criteria (PMID 20639392)                                                                                                                                                                                 | 233                                  | ECG                   | [PMID 15845033]                                                                                                                                                                          |
| FamHS                                                       | Family Heart Study                                                                                                     | Population-based              | 4,135                 | ≥98%                   | Technical errors; Discrepancies between reported sex and sex-diagnostic markers                                                                                                                                | 3,729                                | Peripheral pulse rate | [PMID 8651220]                                                                                                                                                                           |
| LifeLines2                                                  | Lifelines Study release 2                                                                                              | Population-based              | 5,580                 | 95%                    | Non-caucasian individuals; Related individuals (pi-hat > 0.4); Gender mismatches                                                                                                                               | 5,052                                | ECG                   | [PMID 18075776]                                                                                                                                                                          |
| MESA                                                        | The Multi-Ethnic Study of Atherosclerosis                                                                              | Population-based              | 6432                  | >95%                   | Unexplained duplication; Gender mismatches                                                                                                                                                                     | 2,618                                | ECG                   | [PMID 12397006]                                                                                                                                                                          |
| NTR                                                         | Netherlands Twin Registry                                                                                              | Population-based twin study   | 5,408                 | 99.9%                  | Individuals with call rate > 90%; Duplicates; Mendelian errors                                                                                                                                                 | 537                                  | ECG                   | [PMID 20477721]                                                                                                                                                                          |
| RISC                                                        | Relationship between Insulin Sensitivity and Cardiovascular Disease Study                                              | Population-based              | 1,500                 | >98.5%                 | Eigenvector analysis; Duplicates identified by PLINK                                                                                                                                                           | 1,006                                | ECG                   | [PMID 17804762]                                                                                                                                                                          |
| RRgen consortium                                            | <i>Information for the 15 studies in the RRgen consortium can be found in Eijgelsheim et al (2010) [PMID 20639392]</i> |                               |                       |                        |                                                                                                                                                                                                                | 38,991                               | ECG                   | [PMID 20639392]                                                                                                                                                                          |
| RS3                                                         | Rotterdam Study III                                                                                                    | Population-based              | 2,420                 | >97.5%                 | Individuals with excess heterozygosity; IBS (>4 CEU-SD); IBD Gender mismatch                                                                                                                                   | 2,068                                | ECG                   | [PMID 20639392] [PMID 19728115]                                                                                                                                                          |
| Stanford IST cohort                                         | Stanford Study                                                                                                         | Population-based              | 448                   | >98.5%                 | Eigenvector analysis; Duplicates identified by PLINK                                                                                                                                                           | 327                                  | Peripheral pulse rate | The sample was drawn from multiple studies of insulin resistance at Stanford over the last ~10 years: PMIDs include 18572033, 19217456, 17023708, 18640389, 18572037, 19910937, 19962157 |

Supplementary Table 7 - continued

| Study                                                 | Short name   | Full name                                                                  | Study design                                                             | Total sample size (N) | Call rate <sup>a</sup> | Sample QC<br>Sample specific QC criteria                                                                                                                                                              | Samples in analysis (N) <sup>b</sup> | HR assessment method  | References                                                                                                             |
|-------------------------------------------------------|--------------|----------------------------------------------------------------------------|--------------------------------------------------------------------------|-----------------------|------------------------|-------------------------------------------------------------------------------------------------------------------------------------------------------------------------------------------------------|--------------------------------------|-----------------------|------------------------------------------------------------------------------------------------------------------------|
| <b><i>In silico</i> follow-up studies: Metabochip</b> |              |                                                                            |                                                                          |                       |                        |                                                                                                                                                                                                       |                                      |                       |                                                                                                                        |
|                                                       | EGCUT        | Estonian Genome Center, University of Tartu                                | Case-control study of type 2 diabetes                                    | 2,700                 | 98.5%                  | Individual with call-rate > 98%; individuals with cryptic relatedness; Genetic outliers from PC analyses                                                                                              | 2,585                                | Peripheral pulse rate | [PMID 19424496] Metspalu, A. The Estonian Genome Project. Drug Development Research 62, 97-101 (2004)                  |
|                                                       | Ely          | Ely Study                                                                  | Population-based                                                         | 1,602                 | ≥95%                   | Individuals with gender inconsistencies                                                                                                                                                               | 653                                  | Peripheral pulse rate | [PMID 17257284]                                                                                                        |
|                                                       | EPIC-Norfolk | European Prospective Investigation into Cancer and Nutrition - Norfolk     | Case-control study of type 2 diabetes                                    | 1,694                 | ≥95%                   | Individuals with gender inconsistencies                                                                                                                                                               | 1,686                                | Peripheral pulse rate | [PMID 20824172]                                                                                                        |
|                                                       | Fenland      | Fenland Study                                                              | Population-based                                                         | 3,186                 | ≥95%                   | Individuals with gender inconsistencies                                                                                                                                                               | 3,182                                | Peripheral pulse rate | [PMID 21248185]                                                                                                        |
|                                                       | Finrisk07    | Finrisk 2007 Study                                                         | Population-based                                                         | 3,952                 | 99.9%                  | Individuals with call rate < 95%; Related individuals ( $\pi$ hat > 0.2 with another sample); Individuals showing evidence of cryptic relatedness ( $\pi$ hat 0.05-0.02 with many samples in dataset) | 3,942                                | Peripheral pulse rate | The National FINRISK Study, National Institute for Health and Welfare. (Accessed 6.4.2011, at www.ktl.fi/portal/4168.) |
|                                                       | NSHD         | 1946 British Birth Cohort                                                  | Population-based birth cohort                                            | 988                   | ≥95%                   | Individuals with gender inconsistencies                                                                                                                                                               | 959                                  | Peripheral pulse rate | [PMID 16204333]                                                                                                        |
|                                                       | PIVUS        | Prospective Investigation of the Vasculature in Uppsala Seniors            | Population-based                                                         | 998                   | 99.6%                  | Individuals with call-rate < 90%; Individuals with excess heterozygosity ( $F$ -mean( $F$ )/ sd( $Z$ )=5); Ethnic outliers; Related individuals; Duplicates                                           | 968                                  | ECG                   | [PMID 16141402]                                                                                                        |
|                                                       | STR          | Swedish Twin Registry                                                      | Population-based twin study                                              | 2,755                 | 99.9%                  | Individuals with call-rate < 90%; Individuals with excess heterozygosity ( $F$ -mean( $F$ )/ sd( $Z$ )=5); Ethnic outliers; Related individuals; Duplicates                                           | 2,203                                | Peripheral pulse rate | [PMID 17254424]                                                                                                        |
|                                                       | ULSAM        | Uppsala Longitudinal Study of Adult Men                                    | Population-based                                                         | 1,146                 | 99.7%                  | Individuals with call-rate < 90%; Individuals with excess heterozygosity ( $F$ -mean( $F$ )/ sd( $Z$ )=5); Ethnic outliers; Related individuals; Duplicates                                           | 1,103                                | Peripheral pulse rate | [PMID 16030278]                                                                                                        |
|                                                       | Whitehall II | Whitehall II Study                                                         | Population-based                                                         | 3,377                 | ≥95%                   | Individuals with gender inconsistencies                                                                                                                                                               | 3,366                                | Peripheral pulse rate | [PMID 15576467]                                                                                                        |
| <b><i>In silico</i> follow-up study: cardiochip</b>   |              |                                                                            |                                                                          |                       |                        |                                                                                                                                                                                                       |                                      |                       |                                                                                                                        |
|                                                       | EPIC-NL      | European Prospective Investigation into Cancer and Nutrition - Netherlands | Case-control study of coronary heart disease, stroke and type 2 diabetes | 6,220                 | 99.9%                  | Individuals with call rate < 95%; PI-HAT: ≥0.2; Heterozygosity: ≥ 3*SD; Individuals of non european descent (based on population substructure (Eigenstrat))                                           | 5,171 (2,704 cases, 2,467 controls)  | Peripheral pulse rate | [PMID 19483199]                                                                                                        |

<sup>a</sup> Sample genotyping success rate, i.e. percentage of successfully genotyped SNPs per sample; <sup>b</sup> Ns reported are numbers for which association data was provided; Ns in paper may differ due to effective sample size in meta-analysis; <sup>c</sup> The DESIR sample was partly genotyped on a GWA platform (Illumina 370, N = 715), partly using Metabochip (N = 3,687).

**Supplementary Table 8 - Information on genotyping methods, quality control of SNPs, imputation and statistical analysis in studies of stage 2 – *in silico* replication using data from studies with data from GWAS, Metabochip and Cardiochip**

| Study                                                       | Genotyping                                                                                                             |                                                                  |      |                        |                      |                           | Imputation          |      |                                 | SNPs in meta-analysis |     |       | Analysis software  |
|-------------------------------------------------------------|------------------------------------------------------------------------------------------------------------------------|------------------------------------------------------------------|------|------------------------|----------------------|---------------------------|---------------------|------|---------------------------------|-----------------------|-----|-------|--------------------|
|                                                             | Platform                                                                                                               | Genotype calling algorithm                                       | MAF  | Call rate <sup>a</sup> | p HWE                | SNPs that met QC criteria | Imputation software | MAF  | Imputation quality <sup>b</sup> | Combined              | Men | Women |                    |
| <b><i>In silico</i> follow-up studies: Genome-wide data</b> |                                                                                                                        |                                                                  |      |                        |                      |                           |                     |      |                                 |                       |     |       |                    |
| ALSPAC 12-yr old children                                   | Illumina 550k                                                                                                          | GenCall                                                          | >1%  | >97%                   | 10 <sup>-07</sup>    | 488,325                   | MACH                | >1%  | r <sup>2</sup> hat ≥ 0.3        | -                     | 47  | 47    | MACH2QTL           |
| ACTS                                                        | Illumina Human CNV370-Quad v3 / 610k-Quad v1 / Illumina 317K                                                           | GenomeStudio                                                     | ≥1%  | ≥95%                   | >10 <sup>-06</sup>   | 269,840                   | MACH                | ≥1%  | r <sup>2</sup> hat ≥ 0.3        | 44                    | -   | -     | Merlin             |
| DESIR                                                       | Illumina 370                                                                                                           | BeadStudio-Gencall v3.0                                          | ≥1%  | ≥95%                   | ≥10 <sup>-04</sup>   | 308,846                   | IMPUTE              | ≥1%  | proper info ≥ 0.4               | -                     | 47  | 47    | SNPtest            |
| EGCUT                                                       | Illumina 370CNV / OMNIExpress                                                                                          | BeadStudio-Gencall v3.0                                          | 1%   | ≥98%                   | >10 <sup>-06</sup>   | 194,589                   | IMPUTE              | none | proper info ≥ 0.4               | -                     | 47  | 47    | SNPtest            |
| ERF                                                         | Illumina 318k / 370k / Affymetrix 250k                                                                                 | Beadstudio                                                       | none | 98%                    | >10 <sup>-06</sup>   | 277,599                   | MACH                | ≥1%  | r <sup>2</sup> hat ≥ 0.3        | 47                    | -   | -     | GenABEL / ProbABEL |
| FamHS                                                       | Illumina 550k / 610k / 1M                                                                                              | BeadStudio-Gencall v3.0                                          | >1%  | ≥98%                   | >10 <sup>-06</sup>   | 503,187                   | MACH                | none | r <sup>2</sup> hat ≥ 0.3        | 47                    | -   | -     | SAS / Metal        |
| LifeLines2                                                  | Illumina CytoSNP12 v2                                                                                                  | GenomeStudio                                                     | 1%   | 98%                    | >10 <sup>-05</sup>   | 257,581                   | BEAGLE              | none | info > 0.3                      | -                     | 44  | 44    | R                  |
| MESA                                                        | Affymetrix 6.0                                                                                                         | Birdseed                                                         | none | >95%                   | none                 | 389,107                   | IMPUTE              | none | proper info ≥ 0.4               | -                     | 47  | 47    | R                  |
| NTR                                                         | Affymetrix 500k Perlegen / 1M / Illumina 370k / 660k                                                                   | BeadStudio / Perlegen Proprietary / Affymetrix Genotyping Studio | ≥1%  | >95%                   | >10 <sup>-05</sup>   | 465,474                   | IMPUTE              | >1%  | proper info ≥ 0.4               | 47                    | -   | -     | SNPtest            |
| RISC                                                        | Affymetrix 6.0                                                                                                         | BirdSeed                                                         | >2%  | >90%                   | >5x10 <sup>-6</sup>  | 909,508                   | MACH                | none | r <sup>2</sup> hat ≥ 0.3        | -                     | 47  | 47    | MACH2QTL           |
| RRgen consortium                                            | <i>Information for the 15 studies in the RRgen consortium can be found in Eijgelsheim et al (2010) [PMID 20639392]</i> |                                                                  |      |                        |                      |                           |                     |      |                                 | 47                    | -   | -     |                    |
| RS3                                                         | Illumina 610k Quad                                                                                                     | BeadStudio                                                       | none | >95%                   | none                 | 587,383                   | MACH                | 1%   | r <sup>2</sup> hat ≥ 0.3        | -                     | 47  | 47    | MACH2QTL           |
| Stanford                                                    | Affymetrix 6.0                                                                                                         | BirdSeed                                                         | >2%  | >90%                   | >5x10 <sup>-06</sup> | 909,508                   | MACH                | none | r <sup>2</sup> hat ≥ 0.3        | -                     | 47  | 47    | MACH2QTL           |
| <b><i>In silico</i> follow-up studies: Metabochip</b>       |                                                                                                                        |                                                                  |      |                        |                      |                           |                     |      |                                 |                       |     |       |                    |
| DESIR                                                       | Metabochip                                                                                                             | BeadStudio-Gencall v3.0                                          | ≥1%  | ≥95%                   | ≥10 <sup>-04</sup>   | 143,649                   | -                   | -    | -                               | -                     | 8   | 8     | SNPtest            |
| EGCUT cases                                                 | Metabochip                                                                                                             | BeadStudio-Gencall v3.0                                          | none | ≥90%                   | >10 <sup>-06</sup>   | 184,420                   | -                   | -    | -                               | -                     | 16  | 16    | SNPtest            |
| EGCUT controls                                              | Metabochip                                                                                                             | BeadStudio-Gencall v3.0                                          | none | ≥90%                   | >10 <sup>-06</sup>   | 184,420                   | -                   | -    | -                               | -                     | 16  | 16    | SNPtest            |
| Ely                                                         | Metabochip                                                                                                             | GenCall                                                          | >0%  | ≥90%                   | >10 <sup>-06</sup>   | 149,302                   | -                   | -    | -                               | -                     | 14  | 14    | SNPtest            |
| EPIC-Norfolk                                                | Metabochip                                                                                                             | GenCall                                                          | >0%  | ≥90%                   | >10 <sup>-06</sup>   | 143,294                   | -                   | -    | -                               | -                     | 13  | 13    | SNPtest            |
| Fenland                                                     | Metabochip                                                                                                             | GenCall                                                          | >0%  | ≥90%                   | >10 <sup>-06</sup>   | 167,085                   | -                   | -    | -                               | -                     | 13  | 13    | SNPtest            |
| Finrisk07                                                   | Metabochip                                                                                                             | GenCall                                                          | none | none                   | none                 | 196,725                   | -                   | -    | -                               | -                     | 14  | 14    | PLINK              |
| NSHD                                                        | Metabochip                                                                                                             | GenCall                                                          | >0%  | ≥90%                   | >10 <sup>-06</sup>   | 146,474                   | -                   | -    | -                               | -                     | 14  | 14    | SNPtest            |
| PIVUS                                                       | Metabochip                                                                                                             | GenCall                                                          | none | ≥90%                   | >10 <sup>-06</sup>   | 19                        | -                   | -    | -                               | -                     | 14  | 14    | PLINK              |
| STR                                                         | Metabochip                                                                                                             | GenCall                                                          | none | ≥90%                   | >10 <sup>-06</sup>   | 19                        | -                   | -    | -                               | 13                    | -   | -     | PLINK              |
| ULSAM                                                       | Metabochip                                                                                                             | GenCall                                                          | none | ≥90%                   | >10 <sup>-06</sup>   | 19                        | -                   | -    | -                               | -                     | 13  | -     | PLINK              |
| Whitehall II                                                | Metabochip                                                                                                             | GenCall                                                          | >0%  | ≥90%                   | >10 <sup>-06</sup>   | 171,257                   | -                   | -    | -                               | -                     | 13  | 13    | SNPtest            |
| <b><i>In silico</i> follow-up study: Cardiochip</b>         |                                                                                                                        |                                                                  |      |                        |                      |                           |                     |      |                                 |                       |     |       |                    |
| EPIC-NL cases                                               | Cardiochip                                                                                                             | Manual                                                           | none | >97%                   | >10 <sup>-06</sup>   | 50,904                    | -                   | -    | -                               | -                     | 12  | 12    | PLINK              |
| EPIC-NL controls                                            | Cardiochip                                                                                                             | Manual                                                           | none | >97%                   | >10 <sup>-06</sup>   | 50,904                    | -                   | -    | -                               | -                     | 12  | 12    | PLINK              |

<sup>a</sup> Sample genotyping success rate; that is, the percentage of successfully genotypes SNPs per sample; <sup>b</sup> SNPtest calculates the 'proper info' statistic as a measure of the relative statistical information about the additive genetic effect being estimated. The proper info statistic has a direct relationship to the power of the test and ranges from 0 to 1, with 1 indicating perfect imputation. MACH calculates rsq\_hat, which is the r<sup>2</sup> between each imputed genotype and its true underlying genotype. Rsq\_hat ranges from 0 to 1, with 1 indicating perfect imputation.

**Supplementary Table 9 - Study-specific descriptive statistics of studies contributing to *in silico* replication in stage 2**

| Study                                      | Trait                    | Men                                                                                               |      |      |        |      |       | Women |      |      |        |      |       |
|--------------------------------------------|--------------------------|---------------------------------------------------------------------------------------------------|------|------|--------|------|-------|-------|------|------|--------|------|-------|
|                                            |                          | N                                                                                                 | mean | SD   | median | min  | max   | N     | mean | SD   | median | min  | max   |
| <b>Follow-up studies: Genome-wide data</b> |                          |                                                                                                   |      |      |        |      |       |       |      |      |        |      |       |
| <b>ALSPAC 12-yr old children</b>           | Age (yrs)                | 1,967                                                                                             | 11.8 | 0.2  | 11.8   | 10.8 | 13.5  | 2,033 | 11.8 | 0.2  | 11.8   | 10.7 | 13.6  |
|                                            | BMI (kg/m <sup>2</sup> ) | 1,967                                                                                             | 18.9 | 3.3  | 18.0   | 13.4 | 37.9  | 2,033 | 19.4 | 3.5  | 18.7   | 12.5 | 36.8  |
|                                            | HR (BPM)                 | 1,967                                                                                             | 73.8 | 10.7 | 74     | 45   | 114   | 2,033 | 78   | 10.7 | 77.5   | 47.5 | 124   |
| <b>ACTS</b>                                | Age (yrs)                | 161                                                                                               | 23.5 | 5.1  | 22     | 18   | 34    | 188   | 22.9 | 4.4  | 22     | 18   | 34    |
|                                            | BMI (kg/m <sup>2</sup> ) | 161                                                                                               | 22.3 | 2.8  | 21.7   | 15.4 | 31.0  | 188   | 21.6 | 2.5  | 21.2   | 17.0 | 32.3  |
|                                            | HR (BPM)                 | 161                                                                                               | 71.8 | 10.7 | 72     | 44   | 96    | 188   | 76   | 9.7  | 76     | 56   | 100   |
| <b>DESIR<sup>a</sup></b>                   | Age (yrs)                | 2,197                                                                                             | 47.2 | 10.0 | 46.5   | 30.1 | 65.8  | 2,205 | 47.4 | 10.0 | 47.1   | 30.1 | 65.5  |
|                                            | BMI (kg/m <sup>2</sup> ) | 2,197                                                                                             | 25.4 | 3.3  | 25.1   | 16.7 | 45.4  | 2,205 | 24.0 | 4.1  | 23.3   | 15.4 | 53.6  |
|                                            | HR (BPM)                 | 2,197                                                                                             | 66.5 | 10.3 | 66     | 36   | 116   | 2,205 | 68.1 | 9.2  | 68     | 40   | 116   |
| <b>EGCUT</b>                               | Age (yrs)                | 230                                                                                               | 38.8 | 15.6 | 34     | 18   | 87    | 541   | 71.9 | 21.4 | 82     | 18   | 103   |
|                                            | BMI (kg/m <sup>2</sup> ) | 230                                                                                               | 26.1 | 4.1  | 25.7   | 17.4 | 48.3  | 541   | 26.7 | 5.2  | 26.0   | 11.9 | 50    |
|                                            | HR (BPM)                 | 230                                                                                               | 68   | 8.4  | 68     | 44   | 100   | 541   | 71.2 | 8.5  | 68     | 52   | 108   |
| <b>ERF</b>                                 | Age (yrs)                | 108                                                                                               | 49.1 | 12.4 | 50.7   | 18.1 | 70.2  | 125   | 49.3 | 14.1 | 47.3   | 20.5 | 80.5  |
|                                            | BMI (kg/m <sup>2</sup> ) | 108                                                                                               | 26.7 | 3.5  | 26.3   | 17.4 | 38.5  | 125   | 26.1 | 4.7  | 25.3   | 17.7 | 45.5  |
|                                            | HR (BPM)                 | 108                                                                                               | 62.3 | 8.9  | 61     | 50   | 97    | 125   | 66.0 | 9.4  | 64     | 50   | 97    |
| <b>FamHS</b>                               | Age (yrs)                | 1,776                                                                                             | 52   | 13.9 | 54     | 25   | 91    | 1,953 | 52   | 13.4 | 54     | 25   | 94    |
|                                            | BMI (kg/m <sup>2</sup> ) | 1,776                                                                                             | 28.0 | 4.6  | 27.3   | 16   | 63.6  | 1,953 | 27.5 | 6.1  | 26.2   | 16.1 | 55.1  |
|                                            | HR (BPM)                 | 1,776                                                                                             | 33.3 | 5.5  | 33     | 19   | 64    | 1,953 | 35.1 | 5.1  | 35     | 15   | 62    |
| <b>LifeLines2</b>                          | Age (yrs)                | 2,212                                                                                             | 43.3 | 9.2  | 43.3   | 19.6 | 85.5  | 2,840 | 43.0 | 8.9  | 43.0   | 18.1 | 85.4  |
|                                            | BMI (kg/m <sup>2</sup> ) | 2,212                                                                                             | 26.4 | 3.7  | 26     | 14.4 | 45.4  | 2,840 | 25.6 | 4.7  | 25.6   | 13.9 | 51.8  |
|                                            | HR (BPM)                 | 2,212                                                                                             | 66.9 | 11.4 | 65     | 36   | 113   | 2,840 | 69.0 | 11.2 | 68     | 41   | 125   |
| <b>MESA</b>                                | Age (yrs)                | 1,257                                                                                             | 62.9 | 10.0 | 63     | 45   | 85    | 1,361 | 62.6 | 10.2 | 63     | 44   | 87    |
|                                            | BMI (kg/m <sup>2</sup> ) | 1,257                                                                                             | 28.0 | 4.2  | 27.5   | 17.4 | 44.3  | 1,361 | 27.6 | 5.8  | 26.6   | 16.9 | 49    |
|                                            | HR (BPM)                 | 1,257                                                                                             | 61.3 | 9.9  | 61     | 36   | 101   | 1,361 | 64.3 | 8.9  | 63     | 40   | 96    |
| <b>NTR</b>                                 | Age (yrs)                | 176                                                                                               | 34.6 | 12.3 | 32.9   | 13.9 | 68.4  | 361   | 32.6 | 12.1 | 30.1   | 14.2 | 80.0  |
|                                            | BMI (kg/m <sup>2</sup> ) | 176                                                                                               | 24.4 | 3.6  | 24.1   | 17.3 | 36.0  | 361   | 23.6 | 3.7  | 23.2   | 15.7 | 44.5  |
|                                            | HR (BPM)                 | 176                                                                                               | 66.0 | 11.0 | 65.4   | 39   | 106.3 | 361   | 70.3 | 9.8  | 70     | 44.5 | 102.5 |
| <b>RISC</b>                                | Age (yrs)                | 445                                                                                               | 43.3 | 8.6  | 43     | 30   | 60    | 561   | 44.4 | 8.2  | 44     | 30   | 61    |
|                                            | BMI (kg/m <sup>2</sup> ) | 445                                                                                               | 26.3 | 3.6  | 26.1   | 17   | 43.9  | 561   | 24.7 | 4.2  | 23.9   | 16.9 | 41.7  |
|                                            | HR (BPM)                 | 445                                                                                               | 66.1 | 10.0 | 65     | 42   | 101   | 561   | 69.9 | 10.3 | 70     | 43   | 109   |
| <b>RRgen</b>                               | Age (yrs)                | <i>Descriptive information of the RRgen consortium in Eijgelsheim et al, 2010 [PMID 20639392]</i> |      |      |        |      |       |       |      |      |        |      |       |
|                                            | BMI (kg/m <sup>2</sup> ) |                                                                                                   |      |      |        |      |       |       |      |      |        |      |       |
|                                            | HR (BPM)                 |                                                                                                   |      |      |        |      |       |       |      |      |        |      |       |

Supplementary Table 9 - continued

| Study                                | Trait                    | Men   |      |      |        |      |       | Women |      |      |        |      |       |
|--------------------------------------|--------------------------|-------|------|------|--------|------|-------|-------|------|------|--------|------|-------|
|                                      |                          | N     | mean | SD   | median | min  | max   | N     | mean | SD   | median | min  | max   |
| <b>RS3</b>                           | Age (yrs)                | 907   | 56.0 | 5.4  | 56.1   | 46.6 | 84.2  | 1,161 | 56.2 | 6.0  | 56.4   | 45.8 | 97.3  |
|                                      | BMI (kg/m <sup>2</sup> ) | 907   | 28.0 | 4.1  | 27.3   | 18.4 | 46.7  | 1,161 | 27.5 | 5.1  | 26.5   | 16.7 | 56.9  |
|                                      | HR (BPM)                 | 907   | 68.3 | 10.9 | 67.5   | 41.1 | 117.7 | 1,161 | 70.4 | 9.9  | 69.8   | 44.1 | 109.1 |
| <b>Stanford</b>                      | Age (yrs)                | 146   | 51.6 | 8.7  | 53     | 28   | 71    | 181   | 51.1 | 9.0  | 52     | 22   | 70    |
|                                      | BMI (kg/m <sup>2</sup> ) | 146   | 30.3 | 5.2  | 30.0   | 18.8 | 55.5  | 181   | 30.1 | 5.7  | 29.3   | 16.6 | 53.8  |
|                                      | HR (BPM)                 | 146   | 68.6 | 10.4 | 67     | 45   | 102   | 181   | 69.1 | 10.7 | 67     | 46   | 101   |
| <b>Follow-up studies: Metabochip</b> |                          |       |      |      |        |      |       |       |      |      |        |      |       |
| <b>EGCUT cases</b>                   | Age (yrs)                | 350   | 63.4 | 10.4 | 64     | 36   | 94    | 596   | 64.3 | 10.6 | 64     | 32   | 93    |
|                                      | BMI (kg/m <sup>2</sup> ) | 350   | 32.3 | 5.0  | 31.7   | 18.7 | 51.4  | 596   | 33.7 | 5.8  | 33.0   | 18.4 | 56.9  |
|                                      | HR (BPM)                 | 350   | 72.3 | 10.9 | 72     | 44   | 116   | 596   | 72.3 | 9.6  | 72     | 48   | 112   |
| <b>EGCUT controls</b>                | Age (yrs)                | 679   | 58.8 | 12.0 | 58     | 22   | 87    | 960   | 56.6 | 12.9 | 56     | 30   | 93    |
|                                      | BMI (kg/m <sup>2</sup> ) | 679   | 25.7 | 4.6  | 24.7   | 16.7 | 43.9  | 960   | 25.0 | 5.3  | 23.5   | 14.6 | 51.0  |
|                                      | HR (BPM)                 | 679   | 69.8 | 10.3 | 68     | 44   | 116   | 960   | 69.3 | 8.4  | 68     | 36   | 112   |
| <b>Ely</b>                           | Age (yrs)                | 331   | 58.1 | 4.6  | 57.3   | 50.2 | 75.0  | 322   | 57.6 | 4.1  | 56.9   | 50.1 | 73.8  |
|                                      | BMI (kg/m <sup>2</sup> ) | 331   | 27.3 | 3.8  | 26.9   | 17.9 | 40.8  | 322   | 26.5 | 4.6  | 25.6   | 18.1 | 46.3  |
|                                      | HR (BPM)                 | 331   | 63.3 | 9.1  | 63     | 41   | 89    | 322   | 66.6 | 8.9  | 66     | 45   | 107   |
| <b>EPIC-Norfolk</b>                  | Age (yrs)                | 848   | 61.0 | 8.7  | 61.6   | 40   | 79.1  | 844   | 60.2 | 9.4  | 60.4   | 33.9 | 77.4  |
|                                      | BMI (kg/m <sup>2</sup> ) | 848   | 27.7 | 3.8  | 27.5   | 16.9 | 49.1  | 844   | 27.4 | 4.8  | 26.5   | 16.3 | 46.0  |
|                                      | HR (BPM)                 | 848   | 69.8 | 12.5 | 68     | 37   | 126.5 | 844   | 73.3 | 12.1 | 72     | 38   | 125   |
| <b>Fenland</b>                       | Age (yrs)                | 1,502 | 46.9 | 7.2  | 46.7   | 30.9 | 60    | 1,709 | 46.9 | 7.0  | 47.2   | 30.5 | 60    |
|                                      | BMI (kg/m <sup>2</sup> ) | 1,502 | 27.0 | 4.1  | 26.5   | 16.4 | 50.6  | 1,709 | 26.5 | 5.5  | 25.3   | 16.9 | 59.9  |
|                                      | HR (BPM)                 | 1,502 | 61.1 | 9.0  | 60     | 36   | 100   | 1,709 | 64.8 | 8.6  | 65     | 38   | 101   |
| <b>Finrisk07</b>                     | Age (yrs)                | 1,794 | 55   | 13.5 | 53.3   | 25   | 74    | 2,148 | 51.8 | 13.6 | 53     | 25   | 74    |
|                                      | BMI (kg/m <sup>2</sup> ) | 1,794 | 27.3 | 4.2  | 26.7   | 15.8 | 63.1  | 2,148 | 26.9 | 5.4  | 25.8   | 16.0 | 52.5  |
|                                      | HR (BPM)                 | 1,794 | 67.1 | 11.9 | 66     | 38   | 120   | 2,148 | 68.6 | 11.3 | 68     | 36   | 132   |
| <b>NSHD</b>                          | Age (yrs)                | 459   | 53   | 0    | 53     | 53   | 53    | 500   | 53   | 0    | 53     | 53   | 53    |
|                                      | BMI (kg/m <sup>2</sup> ) | 459   | 27.6 | 4.1  | 26.9   | 18.2 | 43.1  | 500   | 27.5 | 5.2  | 26.5   | 18.6 | 52.9  |
|                                      | HR (BPM)                 | 459   | 69.5 | 12.0 | 68     | 34   | 105   | 500   | 68.8 | 11.3 | 69     | 41   | 129   |
| <b>PIVUS</b>                         | Age (yrs)                | 484   | 70.1 | 0.2  | 70.1   | 69.8 | 72.3  | 484   | 70.3 | 0.2  | 70.3   | 69.9 | 70.8  |
|                                      | BMI (kg/m <sup>2</sup> ) | 484   | 27.1 | 3.7  | 27.0   | 17.7 | 43.4  | 484   | 27.1 | 4.9  | 26.5   | 16.6 | 49.8  |
|                                      | HR (BPM)                 | 484   | 59.3 | 9.1  | 58     | 39   | 96    | 484   | 61.3 | 8.7  | 61     | 41   | 100   |
| <b>STR</b>                           | Age (yrs)                | 829   | 74.4 | 10.2 | 76.7   | 45.8 | 93.4  | 1,374 | 76.4 | 9.9  | 78.4   | 39.8 | 103.8 |
|                                      | BMI (kg/m <sup>2</sup> ) | 829   | 25.2 | 3.4  | 24.8   | 14.5 | 39.2  | 1,374 | 24.9 | 4.2  | 24.5   | 14.1 | 46.1  |
|                                      | HR (BPM)                 | 829   | 68.4 | 11.8 | 67     | 37   | 122   | 1,374 | 71.9 | 11.7 | 71     | 39   | 125   |

**Supplementary Table 9 - continued**

| Study                              | Trait                    | Men   |      |      |        |      |      | Women |      |      |        |      |       |
|------------------------------------|--------------------------|-------|------|------|--------|------|------|-------|------|------|--------|------|-------|
|                                    |                          | N     | mean | SD   | median | min  | max  | N     | mean | SD   | median | min  | max   |
| <b>ULSAM</b>                       | Age (yrs)                | 1,103 | 71.0 | 0.6  | 71.0   | 69.4 | 74.1 |       |      |      |        |      |       |
|                                    | BMI (kg/m <sup>2</sup> ) | 1,103 | 25.3 | 3.4  | 25.9   | 16.7 | 46.3 |       |      |      |        |      |       |
|                                    | HR (BPM)                 | 1,103 | 65.2 | 8.9  | 64     | 42   | 104  |       |      |      |        |      |       |
| <b>Whitehall II</b>                | Age (yrs)                | 2,547 | 60.7 | 5.9  | 59.6   | 50.6 | 73.7 | 819   | 61.0 | 6.0  | 60.5   | 50.5 | 73.3  |
|                                    | BMI (kg/m <sup>2</sup> ) | 2,547 | 26.6 | 3.7  | 26.3   | 17.9 | 48.7 | 819   | 27.3 | 5.5  | 26.2   | 15.8 | 49    |
|                                    | HR (BPM)                 | 2,547 | 67.2 | 12.0 | 66     | 35   | 124  | 819   | 68.5 | 10.9 | 68     | 39   | 115   |
| <b>Follow-up study: Cardiochip</b> |                          |       |      |      |        |      |      |       |      |      |        |      |       |
| <b>EPIC-NL cases</b>               | Age (yrs)                | 647   | 51.5 | 7.9  | 52.9   | 22.3 | 65.7 | 2,057 | 58.0 | 7.8  | 58.5   | 21.4 | 70.1  |
|                                    | BMI (kg/m <sup>2</sup> ) | 647   | 27.7 | 4.0  | 27.3   | 18.2 | 47.0 | 2,057 | 27.7 | 4.8  | 27     | 16   | 55.1  |
|                                    | HR (BPM)                 | 647   | 73.1 | 11.3 | 72     | 48   | 112  | 2,057 | 74.7 | 12.0 | 73.5   | 40   | 139   |
| <b>EPIC-NL controls</b>            | Age (yrs)                | 489   | 44.0 | 11.1 | 45.5   | 21.0 | 65.0 | 1,978 | 53.3 | 10.5 | 54     | 20.3 | 70.1  |
|                                    | BMI (kg/m <sup>2</sup> ) | 489   | 26.1 | 3.7  | 25.7   | 16.4 | 39.9 | 1,978 | 25.6 | 4.1  | 25     | 17.2 | 53.2  |
|                                    | HR (BPM)                 | 489   | 71.6 | 10.7 | 72     | 42   | 110  | 1,978 | 73.5 | 11.0 | 72     | 36   | 113.5 |

<sup>a</sup> The DESIR sample was partly genotyped on a GWA platform (Illumina 370, n = 715), partly using Metabochip (n = 3,687).

**Supplementary Table 10 - Proxy SNPs included in meta-analysis of stage 2**

| near candidate gene(s) | Most significant SNPs at stage 1 | Metabochip <sup>a</sup> | Cardiochip <sup>a</sup> | Proxy <sup>b</sup>      | Distance (bp) | Linkage disequilibrium      |                    | Studies <sup>d</sup> |
|------------------------|----------------------------------|-------------------------|-------------------------|-------------------------|---------------|-----------------------------|--------------------|----------------------|
|                        |                                  |                         |                         |                         |               | r <sup>2</sup> <sup>c</sup> | D' <sup>c</sup>    |                      |
| MYH6                   | rs365990                         |                         | Cardio                  | -                       |               |                             |                    |                      |
| GJA1                   | rs1015451                        |                         | Cardio                  | rs12110693 <sup>C</sup> | 26,785        | 1                           | 1                  |                      |
| TGM2                   | rs6127471                        | Metabo                  |                         | rs6127466 <sup>M</sup>  | 1,155         | 1                           | 1                  |                      |
| ACHE                   | rs13245899                       | Metabo                  | Cardio                  | -                       |               |                             |                    |                      |
| CCDC141                | rs17362588                       |                         |                         | -                       |               |                             |                    |                      |
| CD46                   | rs11118555                       | Metabo                  |                         | -                       |               |                             |                    |                      |
| ALG10                  | rs7980799                        | Metabo                  |                         | -                       |               |                             |                    |                      |
| FADS1                  | rs174549                         | Metabo                  | Cardio                  | rs174548 <sup>C</sup>   | 34            | 0.964                       | 1                  |                      |
| PLN                    | rs11153730                       | Metabo                  | Cardio                  | rs11970286 <sup>C</sup> | 12,852        | 0.935                       | 1                  |                      |
| LINC00477              | rs17287293                       |                         |                         | -                       |               |                             |                    |                      |
| HCN4                   | rs4489968                        | Metabo                  | Cardio                  | rs8040533 <sup>M</sup>  | 765           | 1                           | 1                  |                      |
|                        |                                  |                         |                         | rs17172808 <sup>C</sup> | 1,874         | 1                           | 1                  |                      |
| GNB4                   | rs7612445                        |                         |                         | -                       |               |                             |                    |                      |
| FLRT2                  | rs17796783                       |                         |                         | -                       |               |                             |                    |                      |
| CHRM2                  | rs2350782                        |                         |                         | -                       |               |                             |                    |                      |
| NKX2-5                 | rs6882776                        | Metabo                  |                         | rs6891790 <sup>M</sup>  | 6,582         | 0.911                       | 1                  |                      |
| GNG11                  | rs180242                         | Metabo                  |                         | rs180267 <sup>C</sup>   | 9,054         | 0.859 <sup>H</sup>          | 0.927 <sup>H</sup> |                      |
| B3GNT7                 | rs13030174                       |                         |                         | -                       |               |                             |                    |                      |
| FNDC3B                 | rs9647379                        |                         |                         | rs4894803               | 15,088        | 0.933                       | 0.966              | LifeLines2           |
| RFX4                   | rs2067615                        |                         |                         | -                       |               |                             |                    |                      |
| CPNE8                  | rs826838                         | Metabo                  |                         | rs7953227 <sup>M</sup>  | 160,538       | 1                           | 1                  |                      |
| TFPI                   | rs4140885                        | Metabo                  | Cardio                  | rs8176592 <sup>C</sup>  | 372           | 1                           | 1                  |                      |
| A2BP1                  | rs11645781                       |                         |                         | rs7194057               | 168           | 0.959                       | 1                  | LifeLines2           |
| MYOT                   | rs7722600                        | Metabo                  | Cardio                  | -                       |               |                             |                    |                      |
| PDE11A                 | rs13413635                       |                         |                         | -                       |               |                             |                    |                      |
| PPP1CC                 | rs11065706                       | Metabo                  |                         | rs10160981 <sup>M</sup> | 251,456       | 0.846                       | 0.945              |                      |
| CPNE5                  | rs236373                         |                         |                         | rs9366917               | 1,391         | 0.955                       | 1                  | LifeLines2           |
| ACTN4                  | rs11083475                       |                         | Cardio                  | rs3786837 <sup>C</sup>  | 16,070        | 1                           | 1                  |                      |
| SLC10A7                | rs10213084                       | Metabo                  |                         | rs10014502 <sup>M</sup> | 14,713        | 1                           | 1                  |                      |
| DCP1A                  | rs2029213                        | Metabo                  |                         | rs2306569 <sup>M</sup>  | 103,643       | 0.816                       | 0.958              |                      |
| CMYA5                  | rs10942901                       |                         |                         | -                       |               |                             |                    |                      |
| UHRF1BP1               | rs1555773                        |                         |                         | -                       |               |                             |                    |                      |
| KLF14                  | rs205712                         |                         |                         | -                       |               |                             |                    |                      |
| DNAJC19                | rs2718767                        |                         | Cardio                  | rs2567648 <sup>C</sup>  | 48,644        | 0.841                       | 1                  |                      |
| TCF21                  | rs4896011                        | Metabo                  |                         | -                       |               |                             |                    |                      |
| HSD17B12               | rs7110523                        |                         |                         | -                       |               |                             |                    |                      |
| NPBWR2                 | rs910883                         |                         | Cardio                  | rs6089789 <sup>C</sup>  | 7,575         | 1.000 <sup>H</sup>          | 1.000 <sup>H</sup> |                      |
| MANEA                  | rs10806489                       |                         |                         | -                       |               |                             |                    |                      |
| FAM19A2                | rs17715440                       | Metabo                  |                         | -                       |               |                             |                    |                      |
| ST6GAL2                | rs4384785                        |                         |                         | -                       |               |                             |                    |                      |
| RG9MTD3                | rs12345385                       |                         |                         | -                       |               |                             |                    |                      |
| CLCNKA                 | rs1889785                        |                         | Cardio                  | -                       |               |                             |                    |                      |
|                        |                                  |                         |                         | rs6604912               | 35,257        | 0.933                       | 0.966              | ACTS                 |
| CDH22                  | rs2425787                        |                         |                         | -                       |               |                             |                    |                      |

<sup>a</sup> 'Metabo' or 'Cardio' indicates whether the locus is represented on Metabochip or Cardiochip, either by the exact SNP or by a proxy with r<sup>2</sup> for LD > 0.8; <sup>b</sup> 'M': Proxy SNP with r<sup>2</sup> > 0.8 available on Metabochip, 'C': Proxy SNP with r<sup>2</sup> > 0.8 available on Cardiochip; <sup>c</sup> LD structure based on 1000 genomes pilot study 1 (Johnson et al, 2008 [PMID 18974171]), except for SNPs marked by 'H' (Hapmap release 22); <sup>d</sup> Before embarking on stage 2, up to 3 proxy SNPs were selected for each of the 42 lead SNPs from stage 1. The selection of proxies was based on (in order of importance): 1) availability on Metabochip / Cardiochip; 2) r<sup>2</sup> for LD; 3) proximity to the lead SNP. If the lead SNPs were not available in GWAS of stage 2, they were replaced by the highest ranking available proxy. Studies in which such substitutions were applied in stage 2 are listed here. SNPs are ordered by their P-value in meta-analysis of stage 1 results.



**Supplementary Table 11 - Association of previously confirmed GWAS loci for ECG-derived traits with heart rate in stage 1 results**

| Alleles                    |           |                  |          |          |             |     |                              |          |
|----------------------------|-----------|------------------|----------|----------|-------------|-----|------------------------------|----------|
| SNP                        | Chr       | Nearest gene     | Effect   | Other    | EAF         | dir | p-value                      | ref      |
| <b>PR-interval</b>         |           |                  |          |          |             |     |                              |          |
| <b>rs365990</b>            | <b>14</b> | <b>MYH6</b>      | <b>a</b> | <b>g</b> | <b>0.66</b> | -   | <b>1.85x10<sup>-25</sup></b> | 1        |
| <b>rs11047543</b>          | <b>12</b> | <b>LINC00477</b> | <b>g</b> | <b>a</b> | <b>0.85</b> | +   | <b>1.74x10<sup>-10</sup></b> | 2        |
| rs6800541                  | 3         | SCN10A           | c        | t        | 0.42        | -   | 2.74x10 <sup>-04</sup>       | 1,3      |
| rs11897119                 | 2         | MEIS1            | c        | t        | 0.39        | +   | 7.14x10 <sup>-03</sup>       | 1        |
| rs11708996                 | 3         | SCN5A            | c        | g        | 0.16        | -   | 0.05                         | 2        |
| rs251253                   | 5         | C5orf41          | t        | c        | 0.60        | +   | 0.08                         | 2        |
| rs3807989                  | 7         | CAV1             | a        | g        | 0.42        | -   | 0.27                         | 1,2      |
| rs7692808                  | 4         | ARHGAP24         | g        | a        | 0.65        | -   | 0.58                         | 1,2      |
| rs4944092                  | 11        | WNT11            | a        | g        | 0.68        | +   | 0.67                         | 2        |
| rs1896312                  | 12        | TBX3             | c        | t        | 0.29        | -   | 0.67                         | 2        |
| rs3825214                  | 12        | TBX5             | g        | a        | 0.21        | +   | 0.84                         | 1        |
| <b>QRS-interval</b>        |           |                  |          |          |             |     |                              |          |
| <b>rs11153730</b>          | <b>6</b>  | <b>SLC35F1</b>   | <b>c</b> | <b>t</b> | <b>0.49</b> | -   | <b>1.33x10<sup>-13</sup></b> | 4        |
| rs6801957                  | 3         | SCN10A           | t        | c        | 0.42        | -   | 6.47x10 <sup>-04</sup>       | 1,3,4    |
| rs9851724                  | 3         | SCN10A           | t        | c        | 0.66        | -   | 7.93x10 <sup>-04</sup>       | 4        |
| rs4074536                  | 1         | CASQ2            | t        | c        | 0.71        | +   | 0.03                         | 4        |
| rs1362212                  | 7         | TBX20            | a        | g        | 0.16        | -   | 0.03                         | 4        |
| rs11708996                 | 3         | SCN5A            | c        | g        | 0.16        | -   | 0.05                         | 4        |
| r4687718                   | 3         | TKT              | g        | a        | 0.85        | -   | 0.06                         | 4        |
| rs17608766                 | 17        | GOSR2            | c        | t        | 0.15        | -   | 0.07                         | 4        |
| rs13165478                 | 5         | HAND1            | g        | a        | 0.64        | +   | 0.11                         | 4        |
| rs7784776                  | 7         | IGFBP3           | g        | a        | 0.41        | -   | 0.13                         | 4        |
| rs9436640                  | 1         | NFIA             | t        | g        | 0.49        | -   | 0.15                         | 4        |
| rs17391905                 | 1         | CDKN2C           | t        | g        | 0.97        | +   | 0.17                         | 4        |
| rs1733724                  | 10        | DKK1             | a        | g        | 0.29        | +   | 0.18                         | 4        |
| rs1886512                  | 13        | KLF12            | t        | a        | 0.63        | -   | 0.21                         | 4        |
| rs2242285                  | 3         | LRIG1            | a        | g        | 0.41        | +   | 0.21                         | 4        |
| rs11710077                 | 3         | SCN5A            | a        | t        | 0.75        | -   | 0.25                         | 4        |
| rs7342028                  | 10        | VTG1A            | t        | g        | 0.24        | -   | 0.25                         | 4        |
| rs883079                   | 12        | TBX5             | c        | t        | 0.30        | +   | 0.35                         | 1,4      |
| rs10850409                 | 12        | TBX3             | g        | a        | 0.73        | +   | 0.51                         | 4        |
| rs17020136                 | 2         | HEATR5B          | c        | t        | 0.21        | -   | 0.55                         | 4        |
| rs9912468                  | 17        | PRKCA            | g        | c        | 0.43        | -   | 0.62                         | 4        |
| rs11848785                 | 14        | SIPAIL1          | a        | g        | 0.76        | +   | 0.67                         | 4        |
| rs9470361                  | 6         | CDKN1A           | a        | g        | 0.24        | +   | 0.74                         | 1,4      |
| rs7562790                  | 2         | CRIM1            | g        | t        | 0.42        | -   | 0.84                         | 4        |
| rs2051211                  | 3         | ENDOGL1          | a        | g        | 0.74        | -   | 0.85                         | 4        |
| rs10865879                 | 3         | SCN5A            | a        | c        | 0.75        | -   | 0.90                         | 4        |
| rs991014                   | 18        | SETBP1           | t        | c        | 0.41        | -   | 0.90                         | 4        |
| <b>QT-interval</b>         |           |                  |          |          |             |     |                              |          |
| <b>rs11153730</b>          | <b>6</b>  | <b>SLC35F1</b>   | <b>c</b> | <b>t</b> | <b>0.49</b> | -   | <b>1.33x10<sup>-13</sup></b> | 5,6      |
| <b>rs12210810</b>          | <b>6</b>  | <b>SLC35F1</b>   | <b>g</b> | <b>c</b> | <b>0.95</b> | -   | <b>8.73x10<sup>-05</sup></b> | 7        |
| rs2968863                  | 7         | KCNH2            | c        | t        | 0.78        | -   | 0.04                         | 5,7      |
| rs12576239                 | 11        | KCNQ1            | t        | c        | 0.15        | -   | 0.05                         | 5        |
| rs10919071                 | 1         | ATP1B1           | a        | g        | 0.87        | +   | 0.06                         | 7        |
| rs12053903                 | 3         | SCN5A            | t        | c        | 0.65        | +   | 0.12                         | 5        |
| rs17779747                 | 17        | KCNJ2            | g        | t        | 0.69        | +   | 0.13                         | 7        |
| rs12296050                 | 11        | KCNQ1            | t        | c        | 0.23        | -   | 0.16                         | 7        |
| rs4657178                  | 1         | NOS1AP           | t        | c        | 0.28        | +   | 0.48                         | 7        |
| rs37062                    | 16        | CNOT1            | a        | g        | 0.74        | +   | 0.48                         | 5,7      |
| rs1805128                  | 21        | KCNE1            | a        | g        | 0.04        | -   | 0.52                         | 5        |
| rs12029454                 | 1         | NOS1AP           | a        | g        | 0.18        | +   | 0.53                         | 5        |
| rs4725982                  | 7         | KCNH2            | t        | c        | 0.25        | -   | 0.53                         | 5        |
| rs2074518                  | 17        | LIG3             | c        | t        | 0.51        | -   | 0.55                         | 5        |
| rs12143842                 | 1         | NOS1AP           | t        | c        | 0.26        | +   | 0.63                         | 5-7      |
| rs16857031                 | 1         | NOS1AP           | g        | c        | 0.12        | +   | 0.79                         | 5        |
| rs11129795                 | 3         | SCN5A            | g        | a        | 0.75        | +   | 0.83                         | 7        |
| rs8049607                  | 16        | LITAF            | t        | c        | 0.51        | +   | 0.90                         | 5,7      |
| rs846111                   | 1         | RNF207           | c        | g        | 0.29        | -   | 0.91                         | 5,7      |
| rs10494366                 | 1         | NOS1AP           | g        | t        | 0.38        | -   | 0.94                         | 6        |
| rs2074238                  | 11        | KCNQ1            | c        | t        | 0.93        | -   | 0.95                         | 5        |
| <b>Atrial Fibrillation</b> |           |                  |          |          |             |     |                              |          |
| <b>rs7164883</b>           | <b>15</b> | <b>HCN4</b>      | <b>g</b> | <b>a</b> | <b>0.17</b> | -   | <b>2.29x10<sup>-13</sup></b> | <b>8</b> |
| <b>rs11047543</b>          | <b>12</b> | <b>LINC00477</b> | <b>g</b> | <b>a</b> | <b>0.85</b> | +   | <b>1.74x10<sup>-10</sup></b> | <b>2</b> |
| rs6800541                  | 3         | SCN10A           | t        | c        | 0.58        | +   | 2.74x10 <sup>-04</sup>       | 2        |
| rs11708996                 | 3         | SCN5A            | g        | c        | 0.84        | +   | 0.05                         | 2        |
| rs10824026                 | 10        | SYNPO2L          | a        | g        | 0.83        | +   | 0.06                         | 8        |
| rs251253                   | 5         | C5orf41          | t        | c        | 0.60        | +   | 0.08                         | 2        |
| rs7193343                  | 16        | ATBF1            | t        | c        | 0.20        | +   | 0.10                         | 9        |
| rs6666258                  | 1         | KCNN3            | c        | g        | 0.28        | +   | 0.16                         | 8,10     |
| rs1152591                  | 14        | SYNE2            | a        | g        | 0.48        | -   | 0.16                         | 8        |
| rs2106261                  | 16        | ATBF1            | t        | c        | 0.19        | +   | 0.26                         | 11       |
| rs3807989                  | 7         | CAV1             | g        | a        | 0.58        | +   | 0.27                         | 1,2,8    |
| rs10821415                 | 9         | C9orf            | a        | c        | 0.42        | +   | 0.35                         | 8        |
| rs10033464                 | 4         | PITX2            | t        | g        | 0.13        | -   | 0.46                         | 12       |
| rs6817105                  | 4         | PITX2            | c        | t        | 0.13        | -   | 0.59                         | 8,11,12  |
| rs3903239                  | 1         | PRRX1            | g        | a        | 0.43        | +   | 0.79                         | 8        |
| rs3825214                  | 12        | TBX5             | a        | g        | 0.79        | -   | 0.84                         | 2        |
| rs6843082                  | 4         | PITX2            | g        | a        | 0.25        | +   | 0.97                         | 10       |

SNP, reported in GWAS for ECG-derived traits; Effect allele, the allele that is associated with prolonged PR, QRS and QT-interval or increased prevalence of atrial fibrillation in GWAS for ECG-derived traits; EAF, the effect allele frequency after meta-analysis of stage 1 results; dir, the effect allele for the ECG-derived trait is associated with a higher (+) or lower (-) heart rate; ref, reference of GWAS; SNPs are ordered by p-value for association with heart rate in stage 1 results after GC-adjustment.

Heart rate loci that have previously been identified in GWAS for ECG-derived traits are shown in bold. For *MYH6*, *LINC00477* *SCL35F1* and *HCN4* the most significant SNPs for ECG-derived traits and heart rate were in perfect LD. Rs251253 near-*C5orf41* (associated with PR and atrial fibrillation) is located near *NKX2-5*, but is in low LD with rs6882776 (heart rate) ( $r^2=0.026$ ,  $D'=0.222$ ).

Ref: 1, Holm et al., 2010 [PMID 20062063]; 2, Pfeufer et al., 2010 [PMID 20062060]; 3, Chambers et al., 2010 [PMID 20062061]; 4, Sotoodehnia et al., 2010 [PMID 2176409]; 5, Newton-Cheh et al., 2010 [PMID 19305408]; 6, Nolte et al., 2009 [PMID 19587794]; 7, Pfeufer et al., 2009 [PMID 1935409]; 8, Ellinor et al., 2012 [PMID 22544366]; 9, Gudbjartsson et al., 2009 [PMID 19597491]; 10, Ellinor et al., 2010 [PMID 20173747]; 11, Benjamin et al., 2009 [PMID 19597492]; 12, Gudbjartsson et al., 2007 [PMID 17603472].

**Supplementary Table 12 – Association of the heart rate loci with the risk of atrioventricular block, pacemaker implantation and sudden cardiac death in data from deCODE Genetics**

| Locus                                        | Nearest gene     | Heart rate SNP | Alleles |       | Atrioventricular block |             |         | Pacemaker implantation |             |                        | Sudden cardiac death |             |         |
|----------------------------------------------|------------------|----------------|---------|-------|------------------------|-------------|---------|------------------------|-------------|------------------------|----------------------|-------------|---------|
|                                              |                  |                | Effect  | Other | OR                     | 95% CI      | p-value | OR                     | 95% CI      | p-value                | OR                   | 95% CI      | p-value |
| <b>Previously identified heart rate loci</b> |                  |                |         |       |                        |             |         |                        |             |                        |                      |             |         |
| 1                                            | <i>MYH6</i>      | rs365990       | g       | a     | 0.944                  | 0.79 - 1.12 | 0.51    | 0.914                  | 0.83 - 1.01 | 0.08                   | 0.991                | 0.85 - 1.16 | 0.92    |
| 2                                            | <i>GJA1</i>      | rs1015451      | c       | t     | 0.954                  | 0.73 - 1.24 | 0.73    | 0.964                  | 0.83 - 1.13 | 0.64                   | 1.270                | 1.01 - 1.59 | 0.04    |
| 3                                            | <i>ACHE</i>      | rs13245899     | g       | a     | 1.016                  | 0.82 - 1.27 | 0.88    | 0.955                  | 0.84 - 1.09 | 0.48                   | 0.895                | 0.73 - 1.10 | 0.29    |
| 4                                            | <i>CD46</i>      | rs11118555     | a       | t     | 0.805                  | 0.62 - 1.04 | 0.10    | 0.905                  | 0.78 - 1.05 | 0.18                   | 0.746                | 0.58 - 0.95 | 0.02    |
| 5                                            | <i>FADS1</i>     | rs174549       | a       | g     | 1.001                  | 0.85 - 1.18 | 0.99    | 1.011                  | 0.92 - 1.12 | 0.82                   | 1.131                | 0.97 - 1.32 | 0.12    |
| 6                                            | <i>SLC35F1</i>   | rs11153730     | t       | c     | 0.938                  | 0.80 - 1.10 | 0.44    | 0.953                  | 0.87 - 1.05 | 0.32                   | 1.058                | 0.91 - 1.23 | 0.46    |
| 7                                            | <i>LINC00477</i> | rs17287293     | a       | g     | 0.803                  | 0.64 - 1.01 | 0.06    | 0.829                  | 0.73 - 0.95 | 5.75x10 <sup>-03</sup> | 1.012                | 0.81 - 1.26 | 0.92    |
| <b>Newly identified heart rate loci</b>      |                  |                |         |       |                        |             |         |                        |             |                        |                      |             |         |
| 8                                            | <i>KIAA1755</i>  | rs6127471      | c       | t     | 1.153                  | 0.97 - 1.37 | 0.10    | 0.956                  | 0.78 - 1.06 | 0.37                   | 0.966                | 0.82 - 1.13 | 0.67    |
| 9                                            | <i>CCDC141</i>   | rs17362588     | a       | g     | 0.948                  | 0.73 - 1.22 | 0.68    | 0.937                  | 0.81 - 1.09 | 0.39                   | 1.079                | 0.86 - 1.35 | 0.51    |
| 10                                           | <i>SYT10</i>     | rs7980799      | a       | c     | 1.025                  | 0.87 - 1.21 | 0.77    | 0.992                  | 0.90 - 1.09 | 0.86                   | 0.939                | 0.81 - 1.09 | 0.42    |
| 11                                           | <i>HCN4</i>      | rs4489968      | t       | g     | 0.808                  | 0.65 - 1.01 | 0.06    | 0.910                  | 0.80 - 1.04 | 0.17                   | 0.992                | 0.80 - 1.23 | 0.94    |
| 12                                           | <i>GNB4</i>      | rs7612445      | g       | t     | 1.130                  | 0.92 - 1.39 | 0.26    | 0.921                  | 0.82 - 1.04 | 0.17                   | 1.193                | 0.98 - 1.45 | 0.08    |
| 13                                           | <i>FLRT2</i>     | rs17796783     | t       | c     | 1.037                  | 0.87 - 1.23 | 0.69    | 0.901                  | 0.81 - 1.00 | 0.05                   | 0.988                | 0.83 - 1.16 | 0.89    |
| 14                                           | <i>CHRM2</i>     | rs2350782      | c       | t     | 1.070                  | 0.80 - 1.43 | 0.65    | 0.929                  | 0.78 - 1.11 | 0.41                   | 0.943                | 0.72 - 1.24 | 0.68    |
| 15                                           | <i>NKX2-5</i>    | rs6882776      | g       | a     | 1.066                  | 0.89 - 1.28 | 0.49    | 1.088                  | 0.98 - 1.20 | 0.12                   | 1.190                | 1.00 - 1.41 | 0.04    |
| 16                                           | <i>GNG11</i>     | rs180242       | t       | a     | 0.995                  | 0.84 - 1.18 | 0.95    | 1.010                  | 0.92 - 1.11 | 0.84                   | 1.079                | 0.93 - 1.27 | 0.34    |
| 17                                           | <i>B3GNT7</i>    | rs13030174     | a       | c     | 0.968                  | 0.80 - 1.17 | 0.74    | 1.013                  | 0.91 - 1.13 | 0.83                   | 0.888                | 0.75 - 1.05 | 0.18    |
| 18                                           | <i>FNDC3B</i>    | rs9647379      | c       | g     | 0.970                  | 0.82 - 1.15 | 0.73    | 0.993                  | 0.90 - 1.10 | 0.89                   | 0.978                | 0.83 - 1.15 | 0.78    |
| 19                                           | <i>RFX4</i>      | rs2067615      | a       | t     | 0.917                  | 0.78 - 1.08 | 0.30    | 1.051                  | 0.96 - 1.16 | 0.31                   | 0.941                | 0.81 - 1.09 | 0.42    |
| 20                                           | <i>CPNE8</i>     | rs826838       | c       | t     | 1.093                  | 0.93 - 1.28 | 0.28    | 0.935                  | 0.85 - 1.03 | 0.16                   | 0.949                | 0.82 - 1.10 | 0.49    |
| 21                                           | <i>TFPI</i>      | rs4140885      | a       | g     | 1.034                  | 0.87 - 1.23 | 0.70    | 1.087                  | 0.98 - 1.20 | 0.10                   | 0.992                | 0.85 - 1.16 | 0.92    |
| Multi-SNP predisposition score               |                  |                |         |       | 0.714                  | 0.45 - 1.12 | 0.15    | 0.606                  | 0.46 - 0.80 | 3.56x10 <sup>-04</sup> | 0.975                | 0.63 - 1.50 | 0.91    |

Effect allele, the allele that is associated with higher heart rate; p-value for association after GC-adjustment. Analyses were performed on data from 319 cases and 41,356 controls for atrioventricular block; 978 cases and 40,976 controls for pacemaker implantation; and 370 cases and 41,305 controls for sudden cardiac death. Multi-SNP predisposition score shows the combined effect of the 21 heart rate-associated SNPs per genetically predicted 5 bpm increase in heart rate, based on single SNP summary statistics and weighting by effect sizes for heart rate.

**Supplementary Table 13 – Association of the heart rate loci with blood pressure and the prevalence of hypertension in data from the Global BPgen consortium**

| Locus                                        | Nearest gene     | Heart rate SNP | Alleles |       | Diastolic blood pressure |              |            |                        | Systolic blood pressure |              |            |         | Hypertension         |       |               |                        |
|----------------------------------------------|------------------|----------------|---------|-------|--------------------------|--------------|------------|------------------------|-------------------------|--------------|------------|---------|----------------------|-------|---------------|------------------------|
|                                              |                  |                | Effect  | Other | N                        | beta (mm Hg) | SE (mm Hg) | p-value                | N                       | beta (mm Hg) | SE (mm Hg) | p-value | N <sub>cases</sub> / | OR    | 95% CI        | p-value                |
| <b>Previously identified heart rate loci</b> |                  |                |         |       |                          |              |            |                        |                         |              |            |         |                      |       |               |                        |
| 1                                            | <i>MYH6</i>      | rs365990       | g       | a     | 25,701                   | 0.002        | 0.096      | 0.99                   | 25,679                  | -0.155       | 0.144      | 0.28    | 8,215 / 8,428        | 1.001 | 0.947 - 1.058 | 0.97                   |
| 2                                            | <i>GJA1</i>      | rs1015451      | c       | t     | 32,411                   | 0.021        | 0.140      | 0.88                   | 32,409                  | -0.462       | 0.208      | 0.03    | 9,729 / 10,063       | 0.931 | 0.859 - 1.009 | 0.08                   |
| 3                                            | <i>ACHE</i>      | rs13245899     | g       | a     | 27,772                   | 0.184        | 0.114      | 0.11                   | 27,782                  | 0.110        | 0.168      | 0.51    | 8,394 / 8,377        | 1.060 | 0.991 - 1.134 | 0.09                   |
| 4                                            | <i>CD46</i>      | rs11118555     | a       | t     | 33,285                   | -0.049       | 0.128      | 0.70                   | 33,308                  | -0.430       | 0.188      | 0.02    | 9,626 / 9,947        | 0.947 | 0.879 - 1.020 | 0.15                   |
| 5                                            | <i>FADS1</i>     | rs174549       | a       | g     | 34,210                   | 0.203        | 0.092      | 0.03                   | 34,211                  | 0.118        | 0.136      | 0.38    | 9,777 / 10,102       | 0.984 | 0.933 - 1.038 | 0.55                   |
| 6                                            | <i>SLC35F1</i>   | rs11153730     | t       | c     | 33,580                   | 0.093        | 0.085      | 0.27                   | 33,578                  | 0.205        | 0.127      | 0.11    | 9,624 / 9,927        | 1.075 | 1.024 - 1.129 | 3.82x10 <sup>-03</sup> |
| 7                                            | <i>LINC00477</i> | rs17287293     | a       | g     | 33,694                   | 0.129        | 0.122      | 0.29                   | 33,696                  | 0.108        | 0.183      | 0.56    | 9,679 / 10,001       | 1.030 | 0.960 - 1.106 | 0.41                   |
| <b>Newly identified heart rate loci</b>      |                  |                |         |       |                          |              |            |                        |                         |              |            |         |                      |       |               |                        |
| 8                                            | <i>KIAA1755</i>  | rs6127471      | c       | t     | 33,644                   | 0.135        | 0.086      | 0.11                   | 33,633                  | 0.054        | 0.128      | 0.67    | 9,653 / 9,984        | 0.998 | 0.950 - 1.048 | 0.93                   |
| 9                                            | <i>CCDC141</i>   | rs17362588     | a       | g     | 28,193                   | 0.208        | 0.137      | 0.13                   | 28,324                  | -0.043       | 0.205      | 0.83    | 8,251 / 8,436        | 1.007 | 0.930 - 1.090 | 0.87                   |
| 10                                           | <i>SYT10</i>     | rs7980799      | a       | c     | 32,627                   | 0.129        | 0.088      | 0.15                   | 32,629                  | 0.084        | 0.132      | 0.53    | 9,311 / 9,625        | 1.001 | 0.951 - 1.053 | 0.97                   |
| 11                                           | <i>HCN4</i>      | rs4489968      | t       | g     | 30,711                   | 0.169        | 0.117      | 0.15                   | 30,707                  | 0.141        | 0.174      | 0.42    | 9,044 / 9,131        | 1.041 | 0.972 - 1.114 | 0.26                   |
| 12                                           | <i>GNB4</i>      | rs7612445      | g       | t     | 27,672                   | 0.142        | 0.117      | 0.23                   | 27,651                  | 0.106        | 0.176      | 0.55    | na                   | na    | na            | na                     |
| 13                                           | <i>FLRT2</i>     | rs17796783     | t       | c     | 33,830                   | -0.089       | 0.094      | 0.35                   | 33,839                  | -0.282       | 0.141      | 0.05    | 9,669 / 10,014       | 0.978 | 0.926 - 1.033 | 0.42                   |
| 14                                           | <i>CHRM2</i>     | rs2350782      | c       | t     | 27,697                   | 0.090        | 0.153      | 0.56                   | 27,693                  | -0.005       | 0.229      | 0.98    | 7,889 / 8,083        | 1.018 | 0.931 - 1.113 | 0.69                   |
| 15                                           | <i>NKX2-5</i>    | rs6882776      | g       | a     | 24,738                   | -0.136       | 0.101      | 0.18                   | 24,733                  | -0.237       | 0.148      | 0.11    | 7,413 / 7,545        | 0.976 | 0.919 - 1.036 | 0.43                   |
| 16                                           | <i>NGG11</i>     | rs180242       | t       | a     | 21,148                   | -0.116       | 0.106      | 0.27                   | 21,212                  | -0.035       | 0.160      | 0.83    | 7,081 / 6,641        | 1.048 | 0.985 - 1.115 | 0.14                   |
| 17                                           | <i>B3GNT7</i>    | rs13030174     | a       | c     | 29,428                   | 0.150        | 0.099      | 0.13                   | 29,421                  | 0.105        | 0.147      | 0.48    | 8,537 / 8,540        | 1.006 | 0.949 - 1.067 | 0.84                   |
| 18                                           | <i>FNDC3B</i>    | rs9647379      | c       | g     | 23,056                   | -0.120       | 0.098      | 0.22                   | 23,102                  | -0.214       | 0.144      | 0.14    | 7,430 / 7,380        | 0.956 | 0.903 - 1.012 | 0.12                   |
| 19                                           | <i>RFX4</i>      | rs2067615      | a       | t     | 34,022                   | 0.091        | 0.084      | 0.28                   | 34,029                  | 0.168        | 0.126      | 0.18    | 9,720 / 10,043       | 0.988 | 0.941 - 1.037 | 0.63                   |
| 20                                           | <i>CPNE8</i>     | rs826838       | c       | t     | 33,761                   | 0.064        | 0.086      | 0.46                   | 33,748                  | 0.014        | 0.128      | 0.91    | 9,638 / 9,975        | 0.992 | 0.944 - 1.042 | 0.74                   |
| 21                                           | <i>TFPI</i>      | rs4140885      | a       | g     | 31,800                   | -0.204       | 0.094      | 0.03                   | 31,786                  | -0.278       | 0.140      | 0.05    | 9,136 / 9,440        | 0.967 | 0.916 - 1.021 | 0.23                   |
| Multi-SNP predisposition score               |                  |                |         |       |                          | 0.751        | 0.277      | 6.71x10 <sup>-03</sup> |                         | -0.404       | 0.413      | 0.33    |                      | 1.014 | 0.861 - 1.192 | 0.87                   |

Effect allele, the allele that is associated with higher heart rate; p-value for association after GC-adjustment. Multi-SNP predisposition score shows the combined effect of the 21 heart rate-associated SNPs per 5 bpm increase in heart rate, based on single SNP summary statistics and weighting by effect sizes for heart rate.

**Supplementary Table 14 – Association of the heart rate loci with prevalence of cardiovascular disease in data from the CARDIoGRAM consortium**

| Locus                                        | Nearest gene     | Heart rate SNP | Alleles |       | Coronary artery disease                    |       |               |         | Myocardial infarction                      |               |               |         |
|----------------------------------------------|------------------|----------------|---------|-------|--------------------------------------------|-------|---------------|---------|--------------------------------------------|---------------|---------------|---------|
|                                              |                  |                | Effect  | Other | N <sub>cases</sub> / N <sub>controls</sub> | OR    | 95% CI        | p-value | N <sub>cases</sub> / N <sub>controls</sub> | OR            | 95% CI        | p-value |
| <b>Previously identified heart rate loci</b> |                  |                |         |       |                                            |       |               |         |                                            |               |               |         |
| 1                                            | <i>MYH6</i>      | rs365990       | g       | a     | 8,647 / 44,573                             | 0.978 | 0.939 - 1.018 | 0.28    | 4,434 / 29,288                             | 0.973         | 0.920 - 1.030 | 0.35    |
| 2                                            | <i>GJA1</i>      | rs1015451      | c       | t     | 20,816 / 61,734                            | 0.994 | 0.950 - 1.039 | 0.77    | 11,763 / 40,651                            | 0.995         | 0.940 - 1.053 | 0.87    |
| 3                                            | <i>ACHE</i>      | rs13245899     | g       | a     | 15,604 / 52,833                            | 1.026 | 0.986 - 1.068 | 0.21    | 8,744 / 36,593                             | 1.045         | 0.991 - 1.101 | 0.10    |
| 4                                            | <i>CD46</i>      | rs11118555     | a       | t     | 20,424 / 61,293                            | 1.011 | 0.969 - 1.056 | 0.61    | 11,542 / 40,257                            | 0.987         | 0.934 - 1.043 | 0.64    |
| 5                                            | <i>FADS1</i>     | rs174549       | a       | g     | 21,837 / 62,190                            | 1.003 | 0.974 - 1.033 | 0.84    | 12,545 / 41,126                            | 1.000         | 0.964 - 1.038 | 0.99    |
| 6                                            | <i>SLC35F1</i>   | rs11153730     | t       | c     | 20,129 / 60,894                            | 0.996 | 0.969 - 1.023 | 0.76    | 11,323 / 39,894                            | 1.003         | 0.968 - 1.039 | 0.87    |
| 7                                            | <i>LINC00477</i> | rs17287293     | a       | g     | 20,363 / 61,227                            | 0.997 | 0.959 - 1.037 | 0.90    | 11,424 / 40,141                            | 1.019         | 0.969 - 1.071 | 0.47    |
| <b>Newly identified heart rate loci</b>      |                  |                |         |       |                                            |       |               |         |                                            |               |               |         |
| 8                                            | <i>KIAA1755</i>  | rs6127471      | c       | t     | 20,326 / 61,434                            | 1.019 | 0.991 - 1.047 | 0.18    | 11,404 / 40,503                            | 1.031         | 0.996 - 1.068 | 0.09    |
| 9                                            | <i>CCDC141</i>   | rs17362588     | a       | g     | 18,799 / 59,536                            | 1.005 | 0.963 - 1.048 | 0.83    | 10,370 / 38,769                            | 1.007         | 0.954 - 1.063 | 0.80    |
| 10                                           | <i>SYT10</i>     | rs7980799      | a       | c     | 19,673 / 57,826                            | 1.024 | 0.995 - 1.055 | 0.10    | 11,245 / 39,755                            | 1.015         | 0.979 - 1.053 | 0.42    |
| 11                                           | <i>HCN4</i>      | rs4489968      | t       | g     | 19,280 / 59,785                            | 1.015 | 0.976 - 1.055 | 0.46    | 10,178 / 38,745                            | 1.005         | 0.956 - 1.058 | 0.83    |
| 12                                           | <i>GNB4</i>      | rs7612445      | g       | t     | 18,405 / 55,789                            | 0.967 | 0.932 - 1.003 | 0.07    | 9,970 / 37,797                             | 0.973         | 0.929 - 1.019 | 0.25    |
| 13                                           | <i>FLRT2</i>     | rs17796783     | t       | c     | 21,928 / 62,260                            | 0.995 | 0.966 - 1.026 | 0.76    | 12,584 / 41,163                            | 1.002         | 0.965 - 1.041 | 0.90    |
| 14                                           | <i>CHRM2</i>     | rs2350782      | c       | t     | 19,275 / 59,914                            | 1.009 | 0.960 - 1.061 | 0.72    | 10,689 / 38,997                            | 1.058         | 0.992 - 1.128 | 0.09    |
| 15                                           | <i>NKX2-5</i>    | rs6882776      | g       | a     | 13,482 / 53,461                            | 1.017 | 0.981 - 1.055 | 0.35    | 6,656 / 33,910                             | 1.020         | 0.973 - 1.070 | 0.41    |
| 16                                           | <i>GNG11</i>     | rs180242       | t       | a     | 14,595 / 53,135                            | 0.997 | 0.963 - 1.031 | 0.85    | 7,215 / 33,350                             | 1.012         | 0.966 - 1.061 | 0.60    |
| 17                                           | <i>B3GNT7</i>    | rs13030174     | a       | c     | 15,375 / 51,192                            | 1.011 | 0.975 - 1.048 | 0.57    | 8,798 / 36,335                             | 0.992         | 0.947 - 1.039 | 0.74    |
| 18                                           | <i>FNDC3B</i>    | rs9647379      | c       | g     | 10,756 / 31,233                            | 1.007 | 0.969 - 1.047 | 0.71    | 6,209 / 31,733                             | 1.004         | 0.957 - 1.053 | 0.86    |
| 19                                           | <i>RFX4</i>      | rs2067615      | a       | t     | 20,934 / 61,474                            | 0.995 | 0.968 - 1.023 | 0.74    | 11,932 / 40,403                            | 1.009         | 0.974 - 1.045 | 0.61    |
| 20                                           | <i>CPNE8</i>     | rs826838       | c       | t     | 21,797 / 62,105                            | 0.997 | 0.970 - 1.025 | 0.83    | 12,498 / 41,011                            | 0.995         | 0.961 - 1.030 | 0.76    |
| 21                                           | <i>TFPI</i>      | rs4140885      | a       | g     | 19,192 / 59,799                            | 0.997 | 0.967 - 1.028 | 0.87    | 10,687 / 38,947                            | 0.980         | 0.943 - 1.020 | 0.33    |
| Multi-SNP predisposition score               |                  |                |         |       |                                            | 1.035 | 0.946 - 1.133 | 0.45    |                                            |               |               |         |
|                                              |                  |                |         |       |                                            |       |               |         | 1.075                                      | 0.954 - 1.210 | 0.24          |         |

Effect allele, the allele that is associated with higher heart rate; p-value for association after GC-adjustment. Multi-SNP predisposition score shows the combined effect of the 21 heart rate-associated SNPs per genetically predicted 5 bpm increase in heart rate, based on single SNP summary statistics and weighting by effect sizes for heart rate.

**Supplementary Table 15 - Association of previously confirmed GWAS loci for blood pressure and prevalence of hypertension with heart rate in stage 1 results**

| SNP        | Chr | Nearest gene            | Trait                  | Alleles |       | EAF  | dir | p-value                | ref   |
|------------|-----|-------------------------|------------------------|---------|-------|------|-----|------------------------|-------|
|            |     |                         |                        | Effect  | Other |      |     |                        |       |
| rs661348   | 11  | <i>LSP1/TNNT3</i>       | MAP                    | c       | t     | 0.45 | -   | 9.64x10 <sup>-03</sup> | 1     |
| rs13139571 | 4   | <i>GUCY1A3/GUCY1B3</i>  | DBP                    | c       | a     | 0.76 | -   | 0.01                   | 2     |
| rs2004776  | 1   | <i>AGT</i>              | Hypertension           | t       | c     | 0.24 | -   | 0.02                   | 1     |
| rs17608766 | 17  | <i>GOSR2</i>            | SBP                    | c       | t     | 0.15 | -   | 0.07                   | 2     |
| rs12940887 | 17  | <i>ZNF652</i>           | SBP, DBP               | t       | c     | 0.38 | -   | 0.09                   | 2,3   |
| rs11953630 | 5   | <i>EBF1</i>             | SBP, DBP               | c       | t     | 0.64 | -   | 0.09                   | 2     |
| rs4590817  | 10  | <i>C10orf107</i>        | SBP, DBP, Hypertension | g       | c     | 0.85 | -   | 0.19                   | 2,3   |
| rs1173771  | 5   | <i>NPR3</i>             | SBP, DBP, Hypertension | g       | a     | 0.60 | -   | 0.23                   | 2     |
| rs11191548 | 10  | <i>CYP17A1/NT5C2</i>    | SBP, DBP               | t       | c     | 0.90 | +   | 0.25                   | 2,3,4 |
| rs1378942  | 15  | <i>CYP1A1/ULK3</i>      | SBP, DBP, Hypertension | c       | a     | 0.39 | -   | 0.27                   | 2,3,4 |
| rs10850411 | 12  | <i>TBX3/TBX5</i>        | SBP, DBP               | t       | c     | 0.67 | -   | 0.30                   | 2,4   |
| rs2782980  | 10  | <i>ADRB1</i>            | MAP                    | c       | t     | 0.70 | +   | 0.31                   | 5     |
| rs7129220  | 11  | <i>ADM</i>              | SBP                    | a       | g     | 0.14 | -   | 0.33                   | 2     |
| rs3184504  | 12  | <i>SH2B3</i>            | SBP, DBP               | t       | c     | 0.45 | +   | 0.37                   | 2,4   |
| rs2932538  | 1   | <i>MOV10</i>            | SBP, DBP               | g       | a     | 0.75 | +   | 0.40                   | 2     |
| rs17249754 | 12  | <i>ATP2B1</i>           | SBP, DBP, Hypertension | g       | a     | 0.82 | +   | 0.41                   | 1,2,4 |
| rs1327235  | 20  | <i>JAG1</i>             | SBP, DBP               | g       | a     | 0.45 | +   | 0.41                   | 2     |
| rs653178   | 12  | <i>ATXN2</i>            |                        | c       | t     | 0.46 | +   | 0.44                   | 3     |
| rs17477177 | 7   | <i>PIK3CG</i>           | PP                     | c       | t     | 0.14 | +   | 0.45                   | 5     |
| rs932764   | 10  | <i>PLCE1</i>            | SBP                    | g       | a     | 0.47 | -   | 0.46                   | 2     |
| rs12946454 | 17  | <i>PLCD3</i>            |                        | t       | a     | 0.27 | +   | 0.47                   | 3     |
| rs4846049  | 1   | <i>MTHFR/NPPB</i>       | DBP                    | g       | t     | 0.67 | -   | 0.49                   | 1     |
| rs1446468  | 2   | <i>FIGN</i>             | MAP                    | c       | t     | 0.55 | -   | 0.49                   | 5     |
| rs17367504 | 1   | <i>MTHFR/NPPB</i>       | SBP, DBP, Hypertension | a       | g     | 0.85 | +   | 0.48                   | 2,3   |
| rs2014408  | 11  | <i>SOX6</i>             | MAP                    | t       | c     | 0.20 | +   | 0.52                   | 1     |
| rs319690   | 3   | <i>MAP4</i>             | MAP                    | t       | c     | 0.62 | +   | 0.55                   | 5     |
| rs11222084 | 11  | <i>ADAMTS8</i>          | PP                     | t       | a     | 0.36 | +   | 0.57                   | 5     |
| rs1813353  | 10  | <i>CACNB2</i>           | SBP, DBP, Hypertension | t       | c     | 0.69 | -   | 0.58                   | 2,4   |
| rs633185   | 11  | <i>FJL32810/TMEM133</i> | SBP, DBP, Hypertension | c       | g     | 0.71 | -   | 0.59                   | 2     |
| rs6015450  | 20  | <i>GNAS/EDN3</i>        | SBP, DBP, Hypertension | g       | a     | 0.14 | +   | 0.67                   | 2     |
| rs13002573 | 2   | <i>FIGN</i>             | PP                     | a       | g     | 0.77 | -   | 0.67                   | 5     |
| rs4373814  | 10  | <i>CACNB2</i>           | SBP, DBP               | c       | g     | 0.46 | -   | 0.71                   | 2     |
| rs805303   | 6   | <i>BAT2/BAT5</i>        | SBP, DBP, Hypertension | g       | a     | 0.61 | -   | 0.72                   | 2     |
| rs13082711 | 3   | <i>SLC4A7</i>           | DBP                    | c       | t     | 0.22 | -   | 0.72                   | 2     |
| rs13333226 | 16  | <i>UMOD</i>             | Hypertension           | a       | g     | 0.80 | -   | 0.75                   | 6     |
| rs419076   | 3   | <i>MECOM</i>            | SBP, DBP               | t       | c     | 0.47 | +   | 0.75                   | 2     |
| rs871606   | 4   | <i>CHIC2</i>            | PP                     | t       | c     | 0.86 | -   | 0.67                   | 5     |
| rs3774372  | 3   | <i>ULK4/TRAK1</i>       | DBP                    | c       | t     | 0.19 | +   | 0.82                   | 2,4   |
| rs1421811  | 5   | <i>NPR3</i>             | SBP                    | c       | g     | 0.63 | +   | 0.83                   | 1     |
| rs2521501  | 15  | <i>FURIN/FES</i>        | SBP, DBP               | t       | a     | 0.30 | -   | 0.89                   | 2     |
| rs381815   | 11  | <i>PLEKHA7</i>          | SBP, DBP               | t       | c     | 0.26 | -   | 0.89                   | 2,4   |
| rs1799945  | 6   | <i>HFE</i>              | SBP, DBP, Hypertension | g       | c     | 0.14 | +   | 0.89                   | 2     |
| rs13107325 | 4   | <i>SLC39A8</i>          | SBP, DBP               | c       | t     | 0.93 | +   | 0.92                   | 2     |
| rs1458038  | 4   | <i>FGF5</i>             | SBP, DBP               | t       | c     | 0.31 | +   | 0.99                   | 2,3   |
| rs2071518  | 8   | <i>NOV</i>              | PP                     | t       | c     | 0.26 | +   | 1.00                   | 5     |
| rs3918226  | 7   | <i>NOS3</i>             | DBP                    | t       | c     | na   | na  | na                     | 1     |

SNP, reported in GWAS for diastolic blood pressure (DBP), systolic blood pressure (SBP) and prevalence of hypertension; Effect allele, the allele that is associated with increased blood pressure / prevalence of hypertension in GWAS; EAF, the effect allele frequency after meta-analysis of stage 1 results; dir, the effect allele for blood pressure and prevalence of hypertension is associated with a higher (+) or lower (-) heart rate; ref, reference of GWAS; SNPs are ordered by p-value for association with heart rate in stage 1 results after GC-adjustment.

Trait: Locus was identified as being associated with systolic blood pressure (SBP), diastolic blood pressure (DBP), mean arterial pressure (MAP), pulse pressure (PP) and/or prevalence of hypertension.

Ref: 1, Johnson et al., 2011 [PMID 22100073]; 2, Ehret et al., 2011 [PMID 21909115]; 3, Newton-Cheh, 2009 [PMID 19430483]; 4, Levy et al., 2009 [PMID 19430479]; 5, Wain et al., 2011 [PMID 21909110]; 6, Padmanabhan et al., 2010 [PMID 21082022].

**Supplementary Table 16 - Association of previously confirmed GWAS loci for prevalence of coronary artery disease and myocardial infarction with heart rate in stage 1 results**

| SNP                            | Chr | Nearest gene       | Alleles |       | EAF  | dir | p-value                | ref   |
|--------------------------------|-----|--------------------|---------|-------|------|-----|------------------------|-------|
|                                |     |                    | Effect  | Other |      |     |                        |       |
| <b>Coronary Artery Disease</b> |     |                    |         |       |      |     |                        |       |
| rs12190287                     | 6   | <i>TCF21</i>       | c       | g     | 0.61 | -   | 1.52x10 <sup>-03</sup> | 1     |
| rs12526453                     | 6   | <i>PHACTR1</i>     | c       | g     | 0.66 | -   | 0.01                   | 1     |
| rs216172                       | 17  | <i>SMG6</i>        | c       | g     | 0.35 | +   | 0.02                   | 1     |
| rs17321515                     | 8   | <i>TRIB1</i>       | a       | g     | 0.53 | +   | 0.03                   | 2     |
| rs17609940                     | 6   | <i>ANKS1A</i>      | g       | c     | 0.80 | -   | 0.03                   | 1     |
| rs12936587                     | 17  | <i>PEMT</i>        | g       | a     | 0.58 | +   | 0.03                   | 1     |
| rs579459                       | 9   | <i>ABO</i>         | c       | t     | 0.22 | -   | 0.06                   | 1     |
| rs2075650                      | 19  | <i>APOE/TMEM40</i> | a       | a     | 0.15 | -   | 0.07                   | 3     |
| rs501120                       | 10  | <i>CXCL12</i>      | t       | c     | 0.83 | -   | 0.10                   | 1,4,5 |
| rs2706399                      | 5   | <i>IL5</i>         | g       | a     | 0.50 | -   | 0.13                   | 2     |
| rs6725887                      | 2   | <i>WDR12</i>       | c       | t     | 0.13 | +   | 0.18                   | 1     |
| rs9982601                      | 21  | <i>MRPS6</i>       | t       | c     | 0.15 | -   | 0.19                   | 1     |
| rs2306374                      | 3   | <i>MRAS</i>        | t       | t     | 0.15 | -   | 0.20                   | 1     |
| rs1333049                      | 9   | <i>CDKN2B</i>      | c       | g     | 0.47 | -   | 0.21                   | 1,4,5 |
| rs17114036                     | 1   | <i>PPAP2B</i>      | a       | g     | 0.90 | -   | 0.22                   | 1     |
| rs46522                        | 17  | <i>UBE2Z</i>       | t       | c     | 0.53 | +   | 0.22                   | 1     |
| rs4977574                      | 9   | <i>CDKN2BAS</i>    | g       | a     | 0.47 | -   | 0.26                   | 1,4,5 |
| rs11556924                     | 7   | <i>Z3HC1</i>       | c       | t     | 0.62 | +   | 0.29                   | 1     |
| rs3184504                      | 12  | <i>SH2B3</i>       | t       | c     | 0.45 | +   | 0.37                   | 1     |
| rs17465637                     | 1   | <i>MIA3</i>        | c       | a     | 0.73 | -   | 0.40                   | 1,4   |
| rs599839                       | 1   | <i>PSRC1</i>       | a       | g     | 0.77 | +   | 0.42                   | 1,4,5 |
| rs599839                       | 1   | <i>SORT1</i>       | a       | g     | 0.77 | +   | 0.42                   | 1     |
| rs3825807                      | 15  | <i>ADAMTS7</i>     | a       | g     | 0.59 | -   | 0.48                   | 1     |
| rs2246942                      | 10  | <i>LIPA</i>        | g       | a     | 0.38 | -   | 0.48                   | 2     |
| rs12413409                     | 10  | <i>CYP17A1</i>     | g       | a     | 0.90 | +   | 0.57                   | 1     |
| rs10455872                     | 6   | <i>LPA</i>         | g       | a     | 0.07 | -   | 0.60                   | 6     |
| rs964184                       | 11  | <i>ZNF259</i>      | g       | c     | 0.20 | +   | 0.75                   | 1     |
| rs4299376                      | 2   | <i>ABCG8</i>       | g       | t     | 0.29 | +   | 0.62                   | 2     |
| rs964164                       | 11  | <i>APOA5/APOC3</i> | g       | c     | 0.20 | +   | 0.75                   | 1     |
| rs11206510                     | 1   | <i>PCSK9</i>       | t       | c     | 0.82 | +   | 0.79                   | 1     |
| rs1122608                      | 19  | <i>LDLR</i>        | g       | t     | 0.75 | +   | 0.79                   | 1     |
| rs4773144                      | 13  | <i>COL4A2</i>      | g       | a     | 0.44 | -   | 0.84                   | 1     |
| rs2895811                      | 14  | <i>HHIPL1</i>      | c       | t     | 0.43 | -   | 0.93                   | 1     |
| rs3798220                      | 6   | <i>LPA</i>         | c       | t     | na   | na  | na                     | 1     |
| <b>Myocardial Infarction</b>   |     |                    |         |       |      |     |                        |       |
| rs12526453                     | 6   | <i>PHACTR1</i>     | c       | g     | 0.66 | -   | 0.01                   | 7     |
| rs17321515                     | 8   | <i>TRIB1</i>       | a       | g     | 0.53 | +   | 0.03                   | 2     |
| rs501120                       | 10  | <i>CXCL12</i>      | t       | c     | 0.83 | -   | 0.10                   | 4,7   |
| rs2706399                      | 5   | <i>IL5</i>         | g       | a     | 0.50 | -   | 0.13                   | 2     |
| rs6725887                      | 2   | <i>WDR12</i>       | c       | t     | 0.13 | +   | 0.18                   | 7     |
| rs9982601                      | 21  | <i>MRPS6</i>       | t       | c     | 0.15 | -   | 0.19                   | 7     |
| rs1333049                      | 9   | <i>CDKN2B</i>      | c       | g     | 0.47 | -   | 0.21                   | 4,7   |
| rs17465637                     | 1   | <i>MIA3</i>        | c       | a     | 0.73 | -   | 0.40                   | 7     |
| rs2246942                      | 10  | <i>LIPA</i>        | g       | a     | 0.38 | -   | 0.48                   | 2     |
| rs646776                       | 1   | <i>CELSR2</i>      | t       | c     | 0.78 | +   | 0.56                   | 7     |
| rs4299376                      | 2   | <i>ABCG8</i>       | g       | t     | 0.29 | +   | 0.62                   | 2     |
| rs11206510                     | 1   | <i>PCSK9</i>       | t       | c     | 0.82 | +   | 0.79                   | 7     |
| rs1122608                      | 19  | <i>SMARCA4</i>     | g       | t     | 0.75 | +   | 0.79                   | 7     |

SNP, reported in GWAS for prevalence of coronary artery disease (CAD) and myocardial infarction (MI); Effect allele, the allele that is associated with increased prevalence of CAD / MI in GWAS; EAF, the effect allele frequency after meta-analysis of stage 1 results; dir, the effect allele for prevalence of CAD and MI is associated with a higher (+) or lower (-) heart rate; ref, reference of GWAS. SNPs are ordered by p-value for association with heart rate in stage 1 results after GC-adjustment. rs3798220 was not available in our meta-analysis of stage 1 results.

Ref: 1, Schunkert et al., 2011 [PMID 21378990]; 2, Butterworth et al., 2012 [PMID 21966275]; 3, Ronald et al., 2009 [PMID 19951432]; 4, Samani et al., 2009 [PMID 19164808]; 5, Samani et al., 2007 [PMID 17634449]; 6, Clarke et al., 2009 [PMID 20032323]; 7, Kathiresan et al., 2009 [PMID 19198609].

**Supplementary Table 17 - Genes within 500 kb of the heart rate loci**

| <b>Locus</b>                                 | <b>Nearest gene</b> | <b>Other nearby genes</b>                                                                                                                                                                                                                                                                 |
|----------------------------------------------|---------------------|-------------------------------------------------------------------------------------------------------------------------------------------------------------------------------------------------------------------------------------------------------------------------------------------|
| <b>Previously identified heart rate loci</b> |                     |                                                                                                                                                                                                                                                                                           |
| 1                                            | <i>MYH6</i>         | <i>MIR208A, CMTM5, C19orf10, MYH7, MIR208B, EFS, SLC22A17, BCL2L2-PABPN1, PABPN1, NGDN, BCL2L2, PPP1R3E, HOMEZ, ZFHX2, THTPA, AP1G2, JPH4, SLC7A8, DHRS2, CEBPE, C14orf119, ACIN1, CDH24, PSMB11, PSMB5, C14orf93, JUB, HAUS4, PRMT5, RBM23</i>                                           |
| 2                                            | <i>GJA1</i>         | <i>C6orf170</i>                                                                                                                                                                                                                                                                           |
| 3                                            | <i>ACHE</i>         | <i>UFSP1, SRRT, TRIP6, SLC12A9, EPHB4, ZAN, MUC12, MUC17, TIMP1, POP7, GIGYF1, GNB2, TRIM56, ACTL6B, TFR2, SERBP1, MOSPD3, PCOLCE, FBXO24, AP1S1, VGF, LRCH4, NAT16, SAP25, AGFG2, MOGAT3, PLOD3, ZNHIT1, CLDN15, FIS1, NYAP1, TSC22D4, C7orf61, RABL5, PPP1R35, MEPCE, ZCWPW1, PILRA</i> |
| 4                                            | <i>CD46</i>         | <i>MIR29C, MIR29B2, CR1L, LOC148696, CD34, CR1, PLXNA2, CR2, CD55</i>                                                                                                                                                                                                                     |
| 5                                            | <i>FADS1</i>        | <i>FEN1, MIR1908, TMEM258, mir611, C5H11orf9, FADS2, DKFZP434K028, DAGLA, FADS3, RAB3IL1, BEST1, FTH1, RPLP0P2, SYT7, LRRC10B, PPP1R32, INCENP, SDHAF2, CPSF7, SCGB1D1, SCGB2A1, TMEM216, TMEM138, SCGB1D2, CYBASC3, DAK, SCGB2A2, DDB1, SCGB1D4</i>                                      |
| 6                                            | <i>SLC35F1</i>      | <i>C6orf204, BRD7P3, PLN, LOC100287632, MCM9</i>                                                                                                                                                                                                                                          |
| 7                                            | <i>LINC00477</i>    | <i>SOX5, BCAT1, C12orf77, MIR920, LRMP, CASC1</i>                                                                                                                                                                                                                                         |
| <b>Newly identified heart rate loci</b>      |                     |                                                                                                                                                                                                                                                                                           |
| 8                                            | <i>KIAA1755</i>     | <i>TGM2, BPI, RPRD1B, RPSA, TTI1, LOC388796, SNOR71B, SNOR71A, SNOR71C, SNOR71D, SNHG11, SNORA39, SNORA60, RALGAPB, VSTM2L, CTNBNL1, ADIG, ARHGAP40</i>                                                                                                                                   |
| 9                                            | <i>CCDC141</i>      | <i>TTN, MIR548N, SESTD1, PLEKHA3, FKBP7, DFNB59, PRKRA, OSBPL6</i>                                                                                                                                                                                                                        |
| 10                                           | <i>SYT10</i>        |                                                                                                                                                                                                                                                                                           |
| 11                                           | <i>HCN4</i>         | <i>NEO1, C15orf60, NPTN, CD276, C15orf59</i>                                                                                                                                                                                                                                              |
| 12                                           | <i>GNB4</i>         | <i>MFN1, ACTL6A, ZNF639, MRPL47, NDUFB5, KCNMB3, USP13, PIK3CA, PEX5L, ZMAT3</i>                                                                                                                                                                                                          |
| 13                                           | <i>FLRT2</i>        |                                                                                                                                                                                                                                                                                           |
| 14                                           | <i>CHRM2</i>        | <i>MIR490, PTN, DGKI</i>                                                                                                                                                                                                                                                                  |
| 15                                           | <i>NKX2-5</i>       | <i>BNIP1, STC2, CREBRF, ATP6V0E1, SNORA74B, RPL26L1, LOC100268168, ERGIC1, LOC285593, BOD1, DUSP12</i>                                                                                                                                                                                    |
| 16                                           | <i>GNG11</i>        | <i>GNGT1, TFP12, BET1, CALCR, MIR489, MIR653, COL1A2</i>                                                                                                                                                                                                                                  |
| 17                                           | <i>B3GNT7</i>       | <i>NCL, SNORA75, SNORD20, SNORD82, ARMC9, LINC00471, NMUR1, C2orf57, PSMD1, HTR2B, PTMAP4, MIR1244-2, MIR1244-1, MIR1244-3, PDE6D, C2orf72, COPS7B, SPATA3, LOC348761, GPR55, MIR1471</i>                                                                                                 |
| 18                                           | <i>FNDC3B</i>       | <i>TMEM212, PLD1, GHSR, TRAIL/TNFSF10</i>                                                                                                                                                                                                                                                 |
| 19                                           | <i>RFX4</i>         | <i>RIC8B, C12orf23, MTERFD3, CRY1, POLR3B, TCP11L2</i>                                                                                                                                                                                                                                    |
| 20                                           | <i>CPNE8</i>        | <i>ALG10B</i>                                                                                                                                                                                                                                                                             |
| 21                                           | <i>TFPI</i>         | <i>CALCRL</i>                                                                                                                                                                                                                                                                             |

**Supplementary Table 18 – Gene set enrichment analysis (MAGENTA) of biological pathways using the heart rate GWAS meta-analysis of stage 1 results**

| Database | Gene set / Pathway                                 | Original #<br>genes in gene<br>set | # genes in<br>gene set<br>analyzed by<br>MAGENTA <sup>a</sup> | Nominal GSEA<br>p-value  | FDR q-<br>value | # genes<br>expected above<br>95 <sup>th</sup> percentile<br>cut off | # genes<br>observed<br>above 95 <sup>th</sup><br>percentile cut<br>off | Genes in LD with 21 confirmed<br>heart rate SNPs |
|----------|----------------------------------------------------|------------------------------------|---------------------------------------------------------------|--------------------------|-----------------|---------------------------------------------------------------------|------------------------------------------------------------------------|--------------------------------------------------|
| KEGG     | Dilated cardiomyopathy                             | 92                                 | 79                                                            | 3.00x10 <sup>-05</sup> * | 0.01            | 4                                                                   | 14                                                                     | MYH6, MYH7, PLN, TTN                             |
| KEGG     | Hypertrophic cardiomyopathy                        | 85                                 | 74                                                            | 1.00x10 <sup>-04</sup> * | 0.03            | 4                                                                   | 12                                                                     | MYH6, MYH7, TTN                                  |
| KEGG     | Cardiac muscle contraction                         | 80                                 | 66                                                            | 6.00x10 <sup>-04</sup>   | 0.02            | 3                                                                   | 11                                                                     | MYH6, MYH7                                       |
| KEGG     | Arrhythmogenic right ventricular<br>cardiomyopathy | 76                                 | 67                                                            | 1.20x10 <sup>-03</sup>   | 0.05            | 3                                                                   | 10                                                                     | GJA1                                             |
| KEGG     | Alzheimers disease                                 | 169                                | 152                                                           | 1.30x10 <sup>-03</sup>   | 0.05            | 8                                                                   | 18                                                                     | -                                                |
| KEGG     | Hematopoietic cell lineage                         | 88                                 | 73                                                            | 3.10x10 <sup>-03</sup>   | 0.09            | 4                                                                   | 10                                                                     | CD34                                             |
| KEGG     | Oocyte meiosis                                     | 114                                | 105                                                           | 6.50x10 <sup>-03</sup>   | 0.15            | 5                                                                   | 12                                                                     | -                                                |
| KEGG     | Progesterone mediated oocyte maturation            | 86                                 | 78                                                            | 0.02                     | 0.26            | 4                                                                   | 9                                                                      | -                                                |
| KEGG     | Vascular smooth muscle contraction                 | 115                                | 108                                                           | 0.02                     | 0.3             | 5                                                                   | 11                                                                     | CALCRL                                           |
| KEGG     | RNA degradation                                    | 59                                 | 55                                                            | 0.02                     | 0.26            | 3                                                                   | 7                                                                      | -                                                |
| KEGG     | Dorso ventral axis formation                       | 25                                 | 23                                                            | 0.02                     | 0.24            | 1                                                                   | 4                                                                      | -                                                |
| KEGG     | Huntingtons disease                                | 185                                | 167                                                           | 0.04                     | 0.4             | 8                                                                   | 14                                                                     | TGM2                                             |
| KEGG     | Aldosterone regulated sodium reabsorption          | 42                                 | 39                                                            | 0.04                     | 0.36            | 2                                                                   | 5                                                                      | -                                                |
| BIOCARTA | MPR                                                | 34                                 | 34                                                            | 1.10x10 <sup>-03</sup>   | 0.21            | 2                                                                   | 7                                                                      | GNGT1                                            |
| BIOCARTA | CSK                                                | 24                                 | 20                                                            | 2.50x10 <sup>-03</sup>   | 0.14            | 1                                                                   | 5                                                                      | GNGT1                                            |
| BIOCARTA | MCALPAIN                                           | 25                                 | 24                                                            | 5.50x10 <sup>-03</sup>   | 0.13            | 1                                                                   | 5                                                                      | -                                                |
| BIOCARTA | CXCR4                                              | 24                                 | 24                                                            | 5.70x10 <sup>-03</sup>   | 0.12            | 1                                                                   | 5                                                                      | GNGT1                                            |
| BIOCARTA | AGR                                                | 36                                 | 34                                                            | 6.30x10 <sup>-03</sup>   | 0.12            | 2                                                                   | 6                                                                      | -                                                |
| BIOCARTA | IL17                                               | 17                                 | 15                                                            | 6.60x10 <sup>-03</sup>   | 0.11            | 1                                                                   | 4                                                                      | CD34                                             |
| BIOCARTA | TCRA                                               | 13                                 | 9                                                             | 7.40x10 <sup>-03</sup>   | 0.1             | 0                                                                   | 3                                                                      | -                                                |
| BIOCARTA | TCAPOPTOSIS                                        | 11                                 | 9                                                             | 8.00x10 <sup>-03</sup>   | 0.11            | 0                                                                   | 3                                                                      | -                                                |
| BIOCARTA | STATHMIN                                           | 19                                 | 19                                                            | 0.01                     | 0.15            | 1                                                                   | 4                                                                      | -                                                |
| BIOCARTA | BARR MAPK                                          | 12                                 | 12                                                            | 0.02                     | 0.14            | 1                                                                   | 3                                                                      | GNGT1                                            |
| BIOCARTA | CTL                                                | 15                                 | 12                                                            | 0.02                     | 0.13            | 1                                                                   | 3                                                                      | -                                                |
| BIOCARTA | THELPER                                            | 14                                 | 12                                                            | 0.02                     | 0.14            | 1                                                                   | 3                                                                      | -                                                |
| BIOCARTA | TCYTOTOXIC                                         | 14                                 | 12                                                            | 0.02                     | 0.12            | 1                                                                   | 3                                                                      | -                                                |
| BIOCARTA | CCR3                                               | 23                                 | 22                                                            | 0.02                     | 0.17            | 1                                                                   | 4                                                                      | GNGT1                                            |
| BIOCARTA | SPPA                                               | 22                                 | 22                                                            | 0.02                     | 0.18            | 1                                                                   | 4                                                                      | GNGT1                                            |
| BIOCARTA | ECM                                                | 24                                 | 24                                                            | 0.03                     | 0.19            | 1                                                                   | 4                                                                      | -                                                |
| BIOCARTA | MET                                                | 37                                 | 36                                                            | 0.03                     | 0.18            | 2                                                                   | 5                                                                      | -                                                |
| BIOCARTA | ERYTH                                              | 15                                 | 14                                                            | 0.03                     | 0.18            | 1                                                                   | 3                                                                      | -                                                |
| BIOCARTA | BAD                                                | 26                                 | 25                                                            | 0.03                     | 0.18            | 1                                                                   | 4                                                                      | -                                                |
| BIOCARTA | CDMAC                                              | 16                                 | 15                                                            | 0.03                     | 0.19            | 1                                                                   | 3                                                                      | -                                                |
| BIOCARTA | BARRESTIN SRC                                      | 15                                 | 15                                                            | 0.04                     | 0.18            | 1                                                                   | 3                                                                      | GNGT1                                            |
| BIOCARTA | EDG1                                               | 27                                 | 26                                                            | 0.04                     | 0.18            | 1                                                                   | 4                                                                      | GNGT1                                            |
| BIOCARTA | NO2IL12                                            | 17                                 | 16                                                            | 0.04                     | 0.19            | 1                                                                   | 3                                                                      | -                                                |



Supplementary Table 18 – continued

| Database  | Gene set / Pathway                                                 | Original # genes in gene set | # genes in gene set analyzed by MAGENTA <sup>a</sup> | Nominal GSEA p-value          | FDR q-value | # genes expected above 95 <sup>th</sup> percentile cut off | # genes observed above 95 <sup>th</sup> percentile cut off | Genes in LD with 21 confirmed heart rate SNPs |
|-----------|--------------------------------------------------------------------|------------------------------|------------------------------------------------------|-------------------------------|-------------|------------------------------------------------------------|------------------------------------------------------------|-----------------------------------------------|
| BIOCARTA  | CTLA4                                                              | 21                           | 16                                                   | 0.04                          | 0.18        | 1                                                          | 3                                                          | -                                             |
| BIOCARTA  | ARAP                                                               | 18                           | 16                                                   | 0.04                          | 0.18        | 1                                                          | 3                                                          | -                                             |
| BIOCARTA  | MTA3                                                               | 19                           | 17                                                   | 0.05                          | 0.18        | 1                                                          | 3                                                          | -                                             |
| <b>GO</b> | <b>muscle contraction</b>                                          | <b>99</b>                    | <b>90</b>                                            | <b>3.20x10<sup>-05</sup>*</b> | <b>0.09</b> | <b>5</b>                                                   | <b>15</b>                                                  | <b>GJA1, MYH6, MYH7, TTN, HCN4</b>            |
| <b>GO</b> | <b>regulation of heart contraction</b>                             | <b>31</b>                    | <b>30</b>                                            | <b>8.50x10<sup>-05</sup></b>  | <b>0.07</b> | <b>2</b>                                                   | <b>8</b>                                                   | <b>CHRM2, MYH6, HCN4</b>                      |
| <b>GO</b> | <b>positive regulation of cell adhesion</b>                        | <b>16</b>                    | <b>16</b>                                            | <b>1.00x10<sup>-04</sup></b>  | <b>0.05</b> | <b>1</b>                                                   | <b>6</b>                                                   | <b>TGM2</b>                                   |
| GO        | actin binding                                                      | 283                          | 250                                                  | 7.00x10 <sup>-04</sup>        | 0.27        | 13                                                         | 25                                                         | MYH6, MYH7                                    |
| GO        | protein complex assembly                                           | 102                          | 96                                                   | 8.00x10 <sup>-04</sup>        | 0.29        | 5                                                          | 13                                                         | -                                             |
| GO        | mammary gland development                                          | 29                           | 28                                                   | 1.70x10 <sup>-03</sup>        | 0.3         | 1                                                          | 6                                                          | -                                             |
| GO        | structural constituent of muscle                                   | 42                           | 38                                                   | 2.20x10 <sup>-03</sup>        | 0.3         | 2                                                          | 7                                                          | MYH6, MYH7, TTN                               |
| GO        | transmembrane transporter activity                                 | 15                           | 13                                                   | 2.70x10 <sup>-03</sup>        | 0.34        | 1                                                          | 4                                                          | GJA1                                          |
| GO        | exonuclease activity                                               | 33                           | 30                                                   | 3.20x10 <sup>-03</sup>        | 0.28        | 2                                                          | 6                                                          | FEN1                                          |
| GO        | protein homodimerization activity                                  | 351                          | 322                                                  | 3.20x10 <sup>-03</sup>        | 0.38        | 16                                                         | 28                                                         | ACHE, NKX2-5, MYH6, MYH7,                     |
| GO        | embryonic forelimb morphogenesis                                   | 14                           | 13                                                   | 3.40x10 <sup>-03</sup>        | 0.26        | 1                                                          | 4                                                          | -                                             |
| GO        | condensed nuclear chromosome                                       | 24                           | 21                                                   | 3.60x10 <sup>-03</sup>        | 0.28        | 1                                                          | 5                                                          | TTN                                           |
| GO        | regulation of the force of heart contraction                       | 13                           | 13                                                   | 3.60x10 <sup>-03</sup>        | 0.23        | 1                                                          | 4                                                          | MYH6, PLN                                     |
| GO        | beta-amyloid binding                                               | 16                           | 15                                                   | 4.90x10 <sup>-03</sup>        | 0.29        | 1                                                          | 4                                                          | ACHE                                          |
| GO        | laminin binding                                                    | 10                           | 8                                                    | 4.90x10 <sup>-03</sup>        | 0.29        | 0                                                          | 3                                                          | -                                             |
| GO        | embryonic digit morphogenesis                                      | 25                           | 24                                                   | 5.00x10 <sup>-03</sup>        | 0.3         | 1                                                          | 5                                                          | -                                             |
| GO        | protein heterodimerization activity                                | 190                          | 177                                                  | 5.90x10 <sup>-03</sup>        | 0.43        | 9                                                          | 17                                                         | NKX2-5, MYH6, MYH7, SOX5                      |
| GO        | mitochondrial proton-transporting ATP synthase complex             | 18                           | 16                                                   | 6.30x10 <sup>-03</sup>        | 0.28        | 1                                                          | 4                                                          | -                                             |
| GO        | blood circulation                                                  | 47                           | 46                                                   | 6.70x10 <sup>-03</sup>        | 0.38        | 2                                                          | 7                                                          | PLN, HCN4                                     |
| GO        | nervous system development                                         | 376                          | 336                                                  | 7.60x10 <sup>-03</sup>        | 0.48        | 17                                                         | 27                                                         | ACHE, CHRM2                                   |
| GO        | embryonic heart tube development                                   | 10                           | 9                                                    | 8.40x10 <sup>-03</sup>        | 0.28        | 0                                                          | 3                                                          | NKX2-5                                        |
| GO        | G-protein signaling, coupled to cyclic nucleotide second messenger | 39                           | 38                                                   | 0.01                          | 0.4         | 2                                                          | 6                                                          | CHRM2, CALCL                                  |
| GO        | 3'-5'-exoribonuclease activity                                     | 10                           | 10                                                   | 0.01                          | 0.31        | 1                                                          | 3                                                          | -                                             |
| GO        | acetylcholine binding                                              | 10                           | 10                                                   | 0.01                          | 0.32        | 1                                                          | 3                                                          | ACHE                                          |
| GO        | hydrogen ion transmembrane transporter activity                    | 21                           | 18                                                   | 0.01                          | 0.35        | 1                                                          | 4                                                          | -                                             |
| GO        | striated muscle contraction                                        | 11                           | 10                                                   | 0.01                          | 0.31        | 1                                                          | 3                                                          | MYH6, TTN                                     |
| GO        | hormone-mediated signaling pathway                                 | 52                           | 51                                                   | 0.01                          | 0.43        | 3                                                          | 7                                                          | GNG11, GNB4                                   |
| GO        | sodium channel activity                                            | 11                           | 11                                                   | 0.01                          | 0.33        | 1                                                          | 3                                                          | HCN4                                          |
| GO        | cardiac muscle tissue development                                  | 12                           | 11                                                   | 0.01                          | 0.33        | 1                                                          | 3                                                          | NKX2-5, PLN                                   |
| GO        | SH3 domain binding                                                 | 97                           | 91                                                   | 0.01                          | 0.48        | 5                                                          | 10                                                         | -                                             |
| GO        | dipeptidase activity                                               | 12                           | 11                                                   | 0.01                          | 0.35        | 1                                                          | 3                                                          | -                                             |

Supplementary Table 18 – continued

| Database | Gene set / Pathway                                                 | Original # genes in gene set | # genes in gene set analyzed by MAGENTA <sup>a</sup> | Nominal GSEA p-value | FDR q-value | # genes expected above 95 <sup>th</sup> percentile cut off | # genes observed above 95 <sup>th</sup> percentile cut off | Genes in LD with 21 confirmed heart rate SNPs |
|----------|--------------------------------------------------------------------|------------------------------|------------------------------------------------------|----------------------|-------------|------------------------------------------------------------|------------------------------------------------------------|-----------------------------------------------|
| GO       | T cell receptor complex                                            | 12                           | 11                                                   | 0.01                 | 0.34        | 1                                                          | 3                                                          | -                                             |
| GO       | regulation of G-protein coupled receptor protein signaling pathway | 31                           | 30                                                   | 0.01                 | 0.43        | 2                                                          | 5                                                          | <i>RIC8B</i>                                  |
| GO       | cellular calcium ion homeostasis                                   | 60                           | 53                                                   | 0.01                 | 0.48        | 3                                                          | 7                                                          | <i>PLN</i>                                    |
| GO       | sarcolemma                                                         | 57                           | 54                                                   | 0.01                 | 0.47        | 3                                                          | 7                                                          | -                                             |
| GO       | negative regulation of tumor necrosis factor production            | 11                           | 11                                                   | 0.01                 | 0.36        | 1                                                          | 3                                                          | -                                             |
| GO       | sarcomere organization                                             | 11                           | 11                                                   | 0.01                 | 0.35        | 1                                                          | 3                                                          | <i>MYH6, TTN</i>                              |
| GO       | protein serine/threonine phosphatase complex                       | 12                           | 12                                                   | 0.01                 | 0.38        | 1                                                          | 3                                                          | -                                             |
| GO       | regulation of smooth muscle contraction                            | 13                           | 12                                                   | 0.01                 | 0.41        | 1                                                          | 3                                                          | <i>CHRM2</i>                                  |
| GO       | calcium channel regulator activity                                 | 12                           | 12                                                   | 0.02                 | 0.38        | 1                                                          | 3                                                          | <i>PLN</i>                                    |
| GO       | mitochondrial ATP synthesis coupled proton transport               | 14                           | 12                                                   | 0.02                 | 0.37        | 1                                                          | 3                                                          | -                                             |
| GO       | cation channel activity                                            | 12                           | 12                                                   | 0.02                 | 0.4         | 1                                                          | 3                                                          | <i>HCN4</i>                                   |
| GO       | phosphoinositide-mediated signaling                                | 35                           | 33                                                   | 0.02                 | 0.48        | 2                                                          | 5                                                          | <i>FEN1</i>                                   |
| GO       | estrogen receptor binding                                          | 13                           | 13                                                   | 0.02                 | 0.4         | 1                                                          | 3                                                          | -                                             |
| GO       | actin filament                                                     | 25                           | 22                                                   | 0.02                 | 0.45        | 1                                                          | 4                                                          | -                                             |
| GO       | spindle organization                                               | 13                           | 13                                                   | 0.02                 | 0.4         | 1                                                          | 3                                                          | -                                             |
| GO       | branching morphogenesis of a tube                                  | 23                           | 23                                                   | 0.02                 | 0.48        | 1                                                          | 4                                                          | -                                             |
| GO       | positive regulation of gene-specific transcription                 | 36                           | 34                                                   | 0.02                 | 0.49        | 2                                                          | 5                                                          | <i>NKX2-5</i>                                 |
| GO       | bone resorption                                                    | 13                           | 13                                                   | 0.03                 | 0.42        | 1                                                          | 3                                                          | -                                             |
| GO       | receptor signaling complex scaffold activity                       | 13                           | 13                                                   | 0.03                 | 0.43        | 1                                                          | 3                                                          | -                                             |
| GO       | insoluble fraction                                                 | 35                           | 34                                                   | 0.03                 | 0.51        | 2                                                          | 5                                                          | -                                             |
| GO       | vasodilation                                                       | 14                           | 14                                                   | 0.03                 | 0.44        | 1                                                          | 3                                                          | -                                             |
| GO       | male genitalia development                                         | 14                           | 14                                                   | 0.03                 | 0.47        | 1                                                          | 3                                                          | -                                             |
| GO       | protein transport                                                  | 406                          | 374                                                  | 0.03                 | 0.68        | 19                                                         | 27                                                         | -                                             |
| GO       | actin cytoskeleton organization                                    | 119                          | 103                                                  | 0.03                 | 0.59        | 5                                                          | 10                                                         | -                                             |
| GO       | lipid transport                                                    | 70                           | 62                                                   | 0.03                 | 0.57        | 3                                                          | 7                                                          | <i>OSBPL6</i>                                 |
| GO       | proton transport                                                   | 57                           | 48                                                   | 0.03                 | 0.59        | 2                                                          | 6                                                          | -                                             |
| GO       | histone methyltransferase complex                                  | 16                           | 15                                                   | 0.03                 | 0.48        | 1                                                          | 3                                                          | -                                             |
| GO       | protein phosphatase type 2A regulator activity                     | 17                           | 15                                                   | 0.04                 | 0.48        | 1                                                          | 3                                                          | -                                             |
| GO       | very-low-density lipoprotein particle                              | 20                           | 15                                                   | 0.04                 | 0.48        | 1                                                          | 3                                                          | -                                             |
| GO       | calcium ion transport                                              | 115                          | 106                                                  | 0.04                 | 0.64        | 5                                                          | 10                                                         | -                                             |
| GO       | cell aging                                                         | 27                           | 26                                                   | 0.04                 | 0.53        | 1                                                          | 4                                                          | -                                             |
| GO       | response to hormone stimulus                                       | 39                           | 38                                                   | 0.04                 | 0.58        | 2                                                          | 5                                                          | -                                             |

Supplementary Table 18 – continued

| Database        | Gene set / Pathway                                          | Original # genes in gene set | # genes in gene set analyzed by MAGENTA <sup>a</sup> | Nominal GSEA p-value          | FDR q-value | # genes expected above 95 <sup>th</sup> percentile cut off | # genes observed above 95 <sup>th</sup> percentile cut off | Genes in LD with 21 confirmed heart rate SNPs |
|-----------------|-------------------------------------------------------------|------------------------------|------------------------------------------------------|-------------------------------|-------------|------------------------------------------------------------|------------------------------------------------------------|-----------------------------------------------|
| GO              | heterotrimeric G-protein complex                            | 27                           | 26                                                   | 0.04                          | 0.54        | 1                                                          | 4                                                          | <i>GNG11, GNGT1</i>                           |
| GO              | intracellular membrane-bounded organelle                    | 140                          | 121                                                  | 0.04                          | 0.67        | 6                                                          | 11                                                         | <i>BNIP1</i>                                  |
| GO              | cytoskeletal protein binding                                | 40                           | 39                                                   | 0.04                          | 0.59        | 2                                                          | 5                                                          | -                                             |
| GO              | calcium channel activity                                    | 41                           | 39                                                   | 0.04                          | 0.58        | 2                                                          | 5                                                          | -                                             |
| GO              | positive regulation of angiogenesis                         | 28                           | 27                                                   | 0.04                          | 0.58        | 1                                                          | 4                                                          | -                                             |
| GO              | connexon complex                                            | 21                           | 16                                                   | 0.04                          | 0.5         | 1                                                          | 3                                                          | <i>GJA1</i>                                   |
| GO              | integral to membrane of membrane fraction                   | 18                           | 17                                                   | 0.05                          | 0.53        | 1                                                          | 3                                                          | -                                             |
| GO              | integral to plasma membrane                                 | 1002                         | 844                                                  | 0.05                          | 0.73        | 42                                                         | 52                                                         | <i>CHRM2, GJA1, CD46, FADS2,</i>              |
| GO              | structural constituent of cytoskeleton                      | 74                           | 66                                                   | 0.05                          | 0.67        | 3                                                          | 7                                                          | -                                             |
| GO              | transcription factor TFIID complex                          | 20                           | 17                                                   | 0.05                          | 0.56        | 1                                                          | 3                                                          | -                                             |
| PANTHER, BP     | Ion transport                                               | 44                           | 40                                                   | 3.00x10 <sup>-03</sup>        | 0.34        | 2                                                          | 7                                                          | <i>HCN4, ALG10, ALG10B</i>                    |
| PANTHER, BP     | Neurotransmitter release                                    | 107                          | 89                                                   | 4.10x10 <sup>-03</sup>        | 0.44        | 4                                                          | 11                                                         | <i>CHRM2, SYT10</i>                           |
| PANTHER, BP     | Glycolysis                                                  | 46                           | 32                                                   | 0.02                          | 0.5         | 2                                                          | 5                                                          | -                                             |
| PANTHER, BP     | mRNA transcription regulation                               | 1459                         | 1039                                                 | 0.02                          | 0.96        | 52                                                         | 65                                                         | <i>NKX2-5, RFX4, SOX5</i>                     |
| PANTHER, BP     | Steroid hormone-mediated signaling                          | 52                           | 34                                                   | 0.02                          | 0.49        | 2                                                          | 5                                                          | -                                             |
| PANTHER, BP     | Gut mesoderm development                                    | 14                           | 14                                                   | 0.03                          | 0.65        | 1                                                          | 3                                                          | -                                             |
| PANTHER, MF     | Exoribonuclease                                             | 35                           | 25                                                   | 1.50x10 <sup>-03</sup>        | 0.11        | 1                                                          | 6                                                          | -                                             |
| PANTHER, MF     | Protein phosphatase                                         | 145                          | 125                                                  | 5.00x10 <sup>-03</sup>        | 0.31        | 6                                                          | 14                                                         | -                                             |
| PANTHER, MF     | Membrane traffic protein                                    | 60                           | 53                                                   | 5.90x10 <sup>-03</sup>        | 0.35        | 3                                                          | 8                                                          | -                                             |
| PANTHER, MF     | Other ion channel                                           | 47                           | 38                                                   | 0.01                          | 0.33        | 2                                                          | 6                                                          | -                                             |
| PANTHER, MF     | Transfer/carrier protein                                    | 108                          | 89                                                   | 0.01                          | 0.37        | 4                                                          | 10                                                         | <i>PLEKHA3, OSBPL6</i>                        |
| PANTHER, MF     | Other nucleic acid binding                                  | 41                           | 30                                                   | 0.02                          | 0.34        | 2                                                          | 5                                                          | <i>PLEKHA3</i>                                |
| PANTHER, MF     | Gap junction                                                | 19                           | 15                                                   | 0.04                          | 0.37        | 1                                                          | 3                                                          | <i>GJA1</i>                                   |
| PANTHER, MF     | mRNA polyadenylation factor                                 | 16                           | 16                                                   | 0.04                          | 0.41        | 1                                                          | 3                                                          | -                                             |
| PANTHER, MF     | Other receptor                                              | 231                          | 187                                                  | 0.04                          | 0.72        | 9                                                          | 15                                                         | -                                             |
| <b>REACTOME</b> | <b>Integration of energy metabolism</b>                     | <b>229</b>                   | <b>199</b>                                           | <b>3.90x10<sup>-05</sup>*</b> | <b>0.08</b> | <b>10</b>                                                  | <b>24</b>                                                  | <b><i>GNG11, GNB4</i></b>                     |
| REACTOME        | mRNA decay by 3 to 5 exoribonuclease                        | 11                           | 11                                                   | 1.30x10 <sup>-03</sup>        | 0.14        | 1                                                          | 4                                                          | -                                             |
| REACTOME        | ERFs are inactivated                                        | 12                           | 12                                                   | 1.90x10 <sup>-03</sup>        | 0.06        | 1                                                          | 4                                                          | -                                             |
| REACTOME        | Inhibition of insulin secretion by adrenaline noradrenaline | 30                           | 28                                                   | 2.20x10 <sup>-03</sup>        | 0.09        | 1                                                          | 6                                                          | <i>GNG11, GNGT1, GNB4</i>                     |
| REACTOME        | Formation of ATP by chemi-osmotic coupling                  | 15                           | 13                                                   | 2.90x10 <sup>-03</sup>        | 0.08        | 1                                                          | 4                                                          | -                                             |
| REACTOME        | Translocation of ZAP70 to immunological synapse             | 24                           | 8                                                    | 5.30x10 <sup>-03</sup>        | 0.08        | 0                                                          | 3                                                          | -                                             |
| REACTOME        | Metabolism of RNA                                           | 96                           | 92                                                   | 5.50x10 <sup>-03</sup>        | 0.26        | 5                                                          | 11                                                         | -                                             |
| REACTOME        | Muscle contraction                                          | 51                           | 46                                                   | 7.10x10 <sup>-03</sup>        | 0.23        | 2                                                          | 7                                                          | <i>MYH6, TTN</i>                              |
| REACTOME        | Metabolism of RNA                                           | 46                           | 45                                                   | 7.30x10 <sup>-03</sup>        | 0.25        | 2                                                          | 7                                                          | -                                             |
| REACTOME        | Regulation of insulin secretion                             | 212                          | 184                                                  | 8.10x10 <sup>-03</sup>        | 0.29        | 9                                                          | 17                                                         | <i>GNG11, GNGT1, GNB4</i>                     |

**Supplementary Table 18 – continued**

| Database | Gene set / Pathway                                         | Original # genes in gene set | # genes in gene set analyzed by MAGENTA <sup>a</sup> | Nominal GSEA p-value | FDR q-value | # genes expected above 95 <sup>th</sup> percentile cut off | # genes observed above 95 <sup>th</sup> percentile cut off | Genes in LD with 21 confirmed heart rate SNPs |
|----------|------------------------------------------------------------|------------------------------|------------------------------------------------------|----------------------|-------------|------------------------------------------------------------|------------------------------------------------------------|-----------------------------------------------|
| REACTOME | Phosphorylation of CD3 and TCR zeta chains                 | 26                           | 10                                                   | 0.01                 | 0.17        | 1                                                          | 3                                                          | -                                             |
| REACTOME | ERK MAPK targets                                           | 21                           | 19                                                   | 0.01                 | 0.26        | 1                                                          | 4                                                          | -                                             |
| REACTOME | Co-stimulation by the CD28 family                          | 70                           | 53                                                   | 0.01                 | 0.29        | 3                                                          | 7                                                          | -                                             |
| REACTOME | Glucose regulation of insulin secretion                    | 161                          | 137                                                  | 0.02                 | 0.35        | 7                                                          | 13                                                         | -                                             |
| REACTOME | CTLA4 inhibitory signalling                                | 21                           | 21                                                   | 0.02                 | 0.29        | 1                                                          | 4                                                          | -                                             |
| REACTOME | Glucagon signalling in metabolic regulation                | 34                           | 33                                                   | 0.02                 | 0.28        | 2                                                          | 5                                                          | <i>GNG11, GNB4</i>                            |
| REACTOME | Smooth muscle contraction                                  | 24                           | 22                                                   | 0.02                 | 0.29        | 1                                                          | 4                                                          | -                                             |
| REACTOME | Nuclear events kinase and transcription factor activation  | 24                           | 22                                                   | 0.02                 | 0.3         | 1                                                          | 4                                                          | -                                             |
| REACTOME | Betacatenin phosphorylation cascade                        | 13                           | 13                                                   | 0.02                 | 0.28        | 1                                                          | 3                                                          | -                                             |
| REACTOME | PD1 signalling                                             | 29                           | 13                                                   | 0.02                 | 0.29        | 1                                                          | 3                                                          | -                                             |
| REACTOME | Regulation of insulin secretion by glucagon like peptide 1 | 61                           | 58                                                   | 0.03                 | 0.34        | 3                                                          | 7                                                          | <i>GNG11, GNGT1, GNB4</i>                     |
| REACTOME | G beta gamma signalling through PI3Kgamma                  | 25                           | 24                                                   | 0.03                 | 0.32        | 1                                                          | 4                                                          | <i>GNG11, GNGT1, GNB4</i>                     |
| REACTOME | GAP junction assembly                                      | 19                           | 15                                                   | 0.03                 | 0.29        | 1                                                          | 3                                                          | <i>GJA1</i>                                   |
| REACTOME | GS alpha mediated events in glucagon signalling            | 27                           | 26                                                   | 0.04                 | 0.34        | 1                                                          | 4                                                          | <i>GNG11, GNB4</i>                            |
| REACTOME | NCAM signalling for neurite out growth                     | 69                           | 64                                                   | 0.04                 | 0.42        | 3                                                          | 7                                                          | -                                             |
| REACTOME | G protein beta gamma signalling                            | 28                           | 27                                                   | 0.04                 | 0.35        | 1                                                          | 4                                                          | <i>GNG11, GNGT1, GNB4</i>                     |
| REACTOME | Striated muscle contraction                                | 31                           | 28                                                   | 0.04                 | 0.36        | 1                                                          | 4                                                          | <i>MYH6, TTN</i>                              |
| REACTOME | Class B2 secretion family receptors                        | 85                           | 80                                                   | 0.05                 | 0.45        | 4                                                          | 8                                                          | <i>GNG11, GNGT1, CALCRL, GNB4</i>             |

Nominal gene set enrichment analysis (GSEA) p-values and false discovery rates were computed for biological gene-sets by applying MAGENTA (Segrè et al, 2010 [PMID 20714348]) to the stage 1 results of the heart rate meta-analysis. The biological gene-sets are from five different resources. Results are presented for the nominally significant pathways ( $p < 0.05$ ). Bonferroni correction is done separately for each database due to considerable overlap of gene sets between databases. The Bonferroni corrected p-value cut-offs for the different databases are: KEGG (186 pathways):  $p < 2.7 \times 10^{-4}$ , BIOCARTA (214 pathways):  $p < 2.3 \times 10^{-4}$ , GO (1,778 pathways):  $p < 2.8 \times 10^{-5}$ , PANTHER, BP (Biological Processes; 217 pathways):  $p < 2.3 \times 10^{-4}$ , PANTHER MF (Molecular Function; 216 pathways):  $p < 2.3 \times 10^{-4}$ , REACTOME (430 pathways):  $p < 1.2 \times 10^{-4}$ . An asterisk marks gene sets that pass the Bonferroni cut-off and in bold are gene sets with FDR  $< 0.1$ . A description of the BioCarta pathways can be found at: <http://www.broadinstitute.org/gsea/msigdb/genesets.jsp?collection=CP:BIOCARTA>.

<sup>a</sup> The number of genes in each gene set analyzed by MAGENTA is after removing genes that were not assigned an association score due to lack of SNPs 110 kb upstream or 40 kb downstream to most extreme transcript boundaries, after correcting for physical proximity along the genome of two or more genes within a gene set (each subset of genes assigned the same best local SNP is represented by a single gene, the one with the most significant gene p-value), and after removing genes absent from our human gene list. Gene set size is restricted to 10 to 2,000 genes.

**Supplementary Table 19 - Top ranked gene association scores for gene sets that are significantly enriched with common variant heart rate associations**

| Gene Symbol                                                   | Entrez ID | Adjusted p-value <sup>a</sup> | Gene information |                                 |                               |          |        |                  | Heart rate stage 1 meta-analysis |         |   |                  |                      |                              |                              |                        |                                                      |
|---------------------------------------------------------------|-----------|-------------------------------|------------------|---------------------------------|-------------------------------|----------|--------|------------------|----------------------------------|---------|---|------------------|----------------------|------------------------------|------------------------------|------------------------|------------------------------------------------------|
|                                                               |           |                               | Chr              | start position, bp <sup>b</sup> | end position, bp <sup>b</sup> | Size, kb | # SNPs | Best (local) SNP | Best SNP position                | Alleles |   | Best SNP z-score | Best SNP Effect size | Best SNP Effect Lower 95% CI | Best SNP Effect Upper 95% CI | Best SNP p-value       | 1=Gene in LD (r <sup>2</sup> >0.5) with 21 lead SNPs |
| <b>KEGG - Dilated cardiomyopathy</b>                          |           |                               |                  |                                 |                               |          |        |                  |                                  |         |   |                  |                      |                              |                              |                        |                                                      |
| <i>TTN</i>                                                    | 7273      | <1.0x10 <sup>-16</sup>        | 2                | 179,098,963                     | 179,380,395                   | 281      | 366    | rs17362588       | 179,429,291                      | a       | g | 8.292            | 0.779                | 0.603                        | 0.954                        | 1.27x10 <sup>-16</sup> | 1                                                    |
| <i>MYH6</i>                                                   | 4624      | <1.0x10 <sup>-16</sup>        | 14               | 22,921,038                      | 22,947,322                    | 26       | 167    | rs365990         | 22,931,651                       | g       | a | 8.300            | 0.606                | 0.498                        | 0.715                        | 1.85x10 <sup>-25</sup> | 1                                                    |
| <i>MYH7</i>                                                   | 4625      | <1.0x10 <sup>-16</sup>        | 14               | 22,951,786                      | 22,974,710                    | 23       | 168    | rs365990         | 22,931,651                       | g       | a | 8.300            | 0.606                | 0.606                        | 0.606                        | 1.85x10 <sup>-25</sup> | 1                                                    |
| <i>PLN</i>                                                    | 5350      | 2.26x10 <sup>-13</sup>        | 6                | 118,976,134                     | 118,988,280                   | 12       | 158    | rs11968176       | 119,007,633                      | c       | a | 6.763            | 0.362                | 0.262                        | 0.462                        | 1.35x10 <sup>-11</sup> | 1                                                    |
| <i>CACNA1D</i>                                                | 776       | 2.60x10 <sup>-05</sup>        | 3                | 53,504,070                      | 53,821,532                    | 317      | 431    | rs13080668       | 53,418,394                       | t       | c | 5.212            | 0.305                | 0.196                        | 0.414                        | 1.87x10 <sup>-07</sup> | 0                                                    |
| <i>ATP2A2</i>                                                 | 488       | 4.00x10 <sup>-04</sup>        | 12               | 109,203,414                     | 109,273,280                   | 70       | 47     | rs6606684        | 109,284,549                      | t       | c | 4.276            | 0.282                | 0.159                        | 0.405                        | 1.90x10 <sup>-05</sup> | 0                                                    |
| <i>DES</i>                                                    | 1674      | 0.01                          | 2                | 219,991,342                     | 219,999,705                   | 8        | 78     | rs4674397        | 220,010,793                      | t       | c | 3.779            | 0.237                | 0.120                        | 0.353                        | 1.58x10 <sup>-04</sup> | 0                                                    |
| <i>ITGA2</i>                                                  | 3673      | 0.01                          | 5                | 52,320,912                      | 52,426,366                    | 105      | 452    | rs870992         | 52,228,994                       | a       | g | 4.029            | 0.389                | 0.209                        | 0.569                        | 5.61x10 <sup>-05</sup> | 0                                                    |
| <i>IGF1</i>                                                   | 3479      | 0.02                          | 12               | 101,313,774                     | 101,398,508                   | 85       | 220    | rs10860859       | 101,277,457                      | a       | g | 3.768            | 0.263                | 0.133                        | 0.392                        | 1.64x10 <sup>-04</sup> | 0                                                    |
| <i>ITGA9</i>                                                  | 3680      | 0.02                          | 3                | 37,468,816                      | 37,836,285                    | 367      | 496    | rs2070482        | 37,668,149                       | g       | a | 4.010            | 0.218                | 0.117                        | 0.319                        | 6.08x10 <sup>-05</sup> | 0                                                    |
| <i>ADCY3</i>                                                  | 109       | 0.02                          | 2                | 24,895,541                      | 24,995,559                    | 100      | 227    | rs2891409        | 24,870,861                       | t       | g | 3.685            | 0.225                | 0.111                        | 0.339                        | 2.29x10 <sup>-04</sup> | 0                                                    |
| <i>DAG1</i>                                                   | 1605      | 0.02                          | 3                | 49,482,568                      | 49,548,052                    | 65       | 71     | rs3870341        | 49,559,749                       | g       | a | 3.501            | 0.216                | 0.107                        | 0.324                        | 4.64x10 <sup>-04</sup> | 0                                                    |
| <i>ITGA1</i>                                                  | 3672      | 0.02                          | 5                | 52,119,892                      | 52,285,242                    | 165      | 512    | rs870992         | 52,228,994                       | a       | g | 4.029            | 0.389                | 0.209                        | 0.569                        | 5.61x10 <sup>-05</sup> | 0                                                    |
| <i>CACNB2</i>                                                 | 783       | 0.03                          | 10               | 18,469,611                      | 18,870,694                    | 401      | 758    | rs17609633       | 18,625,364                       | t       | c | 4.015            | 0.476                | 0.255                        | 0.697                        | 5.94x10 <sup>-05</sup> | 0                                                    |
| <i>CACNA1C</i>                                                | 775       | 0.03                          | 12               | 2,032,676                       | 2,677,376                     | 645      | 829    | rs2238017        | 2,048,806                        | a       | g | 4.147            | 0.246                | 0.135                        | 0.356                        | 3.37x10 <sup>-05</sup> | 0                                                    |
| <i>TPM1</i>                                                   | 7168      | 0.04                          | 15               | 61,121,890                      | 61,151,166                    | 29       | 257    | rs902025         | 61,019,454                       | a       | g | 3.609            | 0.249                | 0.120                        | 0.377                        | 3.08x10 <sup>-04</sup> | 0                                                    |
| <b>KEGG - Hypertrophic cardiomyopathy</b>                     |           |                               |                  |                                 |                               |          |        |                  |                                  |         |   |                  |                      |                              |                              |                        |                                                      |
| <i>TTN</i>                                                    | 7273      | <1.0x10 <sup>-16</sup>        | 2                | 179,098,963                     | 179,380,395                   | 281      | 366    | rs17362588       | 179,429,291                      | a       | g | 8.292            | 0.779                | 0.603                        | 0.954                        | 1.27x10 <sup>-16</sup> | 1                                                    |
| <i>MYH6</i>                                                   | 4624      | <1.0x10 <sup>-16</sup>        | 14               | 22,921,038                      | 22,947,322                    | 26       | 167    | rs365990         | 22,931,651                       | g       | a | 8.300            | 0.606                | 0.498                        | 0.715                        | 1.85x10 <sup>-25</sup> | 1                                                    |
| <i>MYH7</i>                                                   | 4625      | <1.0x10 <sup>-16</sup>        | 14               | 22,951,786                      | 22,974,710                    | 23       | 168    | rs365990         | 22,931,651                       | g       | a | 8.300            | 0.606                | 0.498                        | 0.715                        | 1.85x10 <sup>-25</sup> | 1                                                    |
| <i>CACNA1D</i>                                                | 776       | 2.60x10 <sup>-05</sup>        | 3                | 53,504,070                      | 53,821,532                    | 317      | 431    | rs13080668       | 53,418,394                       | t       | c | 5.212            | 0.305                | 0.196                        | 0.414                        | 1.87x10 <sup>-07</sup> | 0                                                    |
| <i>ATP2A2</i>                                                 | 488       | 4.00x10 <sup>-04</sup>        | 12               | 109,203,414                     | 109,273,280                   | 70       | 47     | rs6606684        | 109,284,549                      | t       | c | 4.276            | 0.282                | 0.159                        | 0.405                        | 1.90x10 <sup>-05</sup> | 0                                                    |
| <i>DES</i>                                                    | 1674      | 0.01                          | 2                | 219,991,342                     | 219,999,705                   | 8        | 78     | rs4674397        | 220,010,793                      | t       | c | 3.779            | 0.237                | 0.120                        | 0.353                        | 1.58x10 <sup>-04</sup> | 0                                                    |
| <i>ITGA2</i>                                                  | 3673      | 0.01                          | 5                | 52,320,912                      | 52,426,366                    | 105      | 452    | rs870992         | 52,228,994                       | a       | g | 4.029            | 0.389                | 0.209                        | 0.569                        | 5.61x10 <sup>-05</sup> | 0                                                    |
| <i>IGF1</i>                                                   | 3479      | 0.02                          | 12               | 101,313,774                     | 101,398,508                   | 85       | 220    | rs10860859       | 101,277,457                      | a       | g | 3.768            | 0.263                | 0.133                        | 0.392                        | 1.64x10 <sup>-04</sup> | 0                                                    |
| <i>ITGA9</i>                                                  | 3680      | 0.02                          | 3                | 37,468,816                      | 37,836,285                    | 367      | 496    | rs2070482        | 37,668,149                       | g       | a | 4.010            | 0.218                | 0.117                        | 0.319                        | 6.08x10 <sup>-05</sup> | 0                                                    |
| <i>DAG1</i>                                                   | 1605      | 0.02                          | 3                | 49,482,568                      | 49,548,052                    | 65       | 71     | rs3870341        | 49,559,749                       | g       | a | 3.501            | 0.216                | 0.101                        | 0.331                        | 4.64x10 <sup>-04</sup> | 0                                                    |
| <i>ITGA1</i>                                                  | 3672      | 0.02                          | 5                | 52,119,892                      | 52,285,242                    | 165      | 512    | rs870992         | 52,228,994                       | a       | g | 4.029            | 0.389                | 0.209                        | 0.569                        | 5.61x10 <sup>-05</sup> | 0                                                    |
| <i>CACNB2</i>                                                 | 783       | 0.03                          | 10               | 18,469,611                      | 18,870,694                    | 401      | 758    | rs17609633       | 18,625,364                       | t       | c | 4.015            | 0.476                | 0.255                        | 0.697                        | 5.94x10 <sup>-05</sup> | 0                                                    |
| <i>CACNA1C</i>                                                | 775       | 0.03                          | 12               | 2,032,676                       | 2,677,376                     | 645      | 829    | rs2238017        | 2,048,806                        | a       | g | 4.147            | 0.246                | 0.135                        | 0.356                        | 3.37x10 <sup>-05</sup> | 0                                                    |
| <i>TPM1</i>                                                   | 7168      | 0.04                          | 15               | 61,121,890                      | 61,151,166                    | 29       | 257    | rs902025         | 61,019,454                       | a       | g | 3.609            | 0.249                | 0.120                        | 0.377                        | 3.08x10 <sup>-04</sup> | 0                                                    |
| <b>KEGG - Arrhythmogenic right ventricular cardiomyopathy</b> |           |                               |                  |                                 |                               |          |        |                  |                                  |         |   |                  |                      |                              |                              |                        |                                                      |
| <i>GJA1</i>                                                   | 2697      | 2.74x10 <sup>-12</sup>        | 6                | 121,798,443                     | 121,812,572                   | 14       | 171    | rs17083533       | 121,772,421                      | a       | g | 6.804            | 0.989                | 0.718                        | 1.260                        | 1.02x10 <sup>-11</sup> | 1                                                    |
| <i>CACNA1D</i>                                                | 776       | 2.60x10 <sup>-05</sup>        | 3                | 53,504,070                      | 53,821,532                    | 317      | 431    | rs13080668       | 53,418,394                       | t       | c | 5.212            | 0.305                | 0.196                        | 0.414                        | 1.87x10 <sup>-07</sup> | 0                                                    |
| <i>ATP2A2</i>                                                 | 488       | 4.00x10 <sup>-04</sup>        | 12               | 109,203,414                     | 109,273,280                   | 70       | 47     | rs6606684        | 109,284,549                      | t       | c | 4.276            | 0.282                | 0.159                        | 0.405                        | 1.90x10 <sup>-05</sup> | 0                                                    |
| <i>ACTN4</i>                                                  | 81        | 6.73x10 <sup>-04</sup>        | 19               | 43,830,166                      | 43,913,010                    | 83       | 141    | rs11083475       | 43,879,952                       | g       | a | 4.315            | 0.227                | 0.129                        | 0.325                        | 1.60x10 <sup>-05</sup> | 0                                                    |
| <i>DES</i>                                                    | 1674      | 0.01                          | 2                | 219,991,342                     | 219,999,705                   | 8        | 78     | rs4674397        | 220,010,793                      | t       | c | 3.779            | 0.237                | 0.120                        | 0.353                        | 1.58x10 <sup>-04</sup> | 0                                                    |
| <i>ITGA2</i>                                                  | 3673      | 0.01                          | 5                | 52,320,912                      | 52,426,366                    | 105      | 452    | rs870992         | 52,228,994                       | a       | g | 4.029            | 0.389                | 0.209                        | 0.569                        | 5.61x10 <sup>-05</sup> | 0                                                    |
| <i>ITGA9</i>                                                  | 3680      | 0.02                          | 3                | 37,468,816                      | 37,836,285                    | 367      | 496    | rs2070482        | 37,668,149                       | g       | a | 4.010            | 0.218                | 0.117                        | 0.319                        | 6.08x10 <sup>-05</sup> | 0                                                    |
| <i>DAG1</i>                                                   | 1605      | 0.02                          | 3                | 49,482,568                      | 49,548,052                    | 65       | 71     | rs3870341        | 49,559,749                       | g       | a | 3.501            | 0.216                | 0.101                        | 0.331                        | 4.64x10 <sup>-04</sup> | 0                                                    |
| <i>ITGA1</i>                                                  | 3672      | 0.02                          | 5                | 52,119,892                      | 52,285,242                    | 165      | 512    | rs870992         | 52,228,994                       | a       | g | 4.029            | 0.389                | 0.209                        | 0.569                        | 5.61x10 <sup>-05</sup> | 0                                                    |
| <i>CACNB2</i>                                                 | 783       | 0.03                          | 10               | 18,469,611                      | 18,870,694                    | 401      | 758    | rs17609633       | 18,625,364                       | t       | c | 4.015            | 0.476                | 0.255                        | 0.697                        | 5.94x10 <sup>-05</sup> | 0                                                    |
| <i>CACNA1C</i>                                                | 775       | 0.03                          | 12               | 2,032,676                       | 2,677,376                     | 645      | 829    | rs2238017        | 2,048,806                        | a       | g | 4.147            | 0.246                | 0.135                        | 0.356                        | 3.37x10 <sup>-05</sup> | 0                                                    |
| <b>KEGG - Cardiac muscle contraction</b>                      |           |                               |                  |                                 |                               |          |        |                  |                                  |         |   |                  |                      |                              |                              |                        |                                                      |
| <i>MYH6</i>                                                   | 4624      | <1.0x10 <sup>-16</sup>        | 14               | 22,921,038                      | 22,947,322                    | 26       | 167    | rs365990         | 22,931,651                       | g       | a | 8.300            | 0.606                | 0.498                        | 0.715                        | 1.85x10 <sup>-25</sup> | 1                                                    |
| <i>MYH7</i>                                                   | 4625      | <1.0x10 <sup>-16</sup>        | 14               | 22,951,786                      | 22,974,710                    | 23       | 168    | rs365990         | 22,931,651                       | g       | a | 8.300            | 0.606                | 0.498                        | 0.715                        | 1.85x10 <sup>-25</sup> | 1                                                    |
| <i>CACNA1D</i>                                                | 776       | 2.60x10 <sup>-05</sup>        | 3                | 53,504,070                      | 53,821,532                    | 317      | 431    | rs13080668       | 53,418,394                       | t       | c | 5.212            | 0.305                | 0.196                        | 0.414                        | 1.87x10 <sup>-07</sup> | 0                                                    |
| <i>ATP2A2</i>                                                 | 488       | 4.00x10 <sup>-04</sup>        | 12               | 109,203,414                     | 109,273,280                   | 70       | 47     | rs6606684        | 109,284,549                      | t       | c | 4.276            | 0.282                | 0.159                        | 0.405                        | 1.90x10 <sup>-05</sup> | 0                                                    |
| <i>UQCRC1</i>                                                 | 7384      | 9.92x10 <sup>-03</sup>        | 3                | 48,611,435                      | 48,622,102                    | 11       | 52     | rs7633840        | 48,694,642                       | c       | t | 3.620            | 0.238                | 0.115                        | 0.361                        | 2.95x10 <sup>-04</sup> | 0                                                    |
| <i>hCG_25371</i>                                              | 440567    | 0.01                          | 1                | 16,006,243                      | 16,006,781                    | 1        | 69     | rs6668183        | 16,046,401                       | c       | g | 3.711            | 0.198                | 0.098                        | 0.297                        | 2.06x10 <sup>-04</sup> | 0                                                    |
| <i>ATP1A4</i>                                                 | 480       | 0.02                          | 1                | 158,387,975                     | 158,423,391                   | 35       | 156    | rs16831388       | 158,362,249                      | g       | a | 3.848            | 0.309                | 0.159                        | 0.459                        | 1.19x10 <sup>-04</sup> | 0                                                    |
| <i>ATP1A2</i>                                                 | 477       | 0.02                          | 1                | 158,352,171                     | 158,379,998                   | 28       | 197    | rs16831388       | 158,362,249                      | g       | a | 3.848            | 0.309                | 0.159                        | 0.459                        | 1.19x10 <sup>-04</sup> | 0                                                    |

Supplementary Table 19 - continued

| Gene Symbol                                          | Entrez ID | Adjusted P-value <sup>a</sup> | Gene information |                                 |                               |          |        | Heart rate stage 1 meta-analysis |                   |         |   |                  |                      |                              |                              |                        |                                                      |
|------------------------------------------------------|-----------|-------------------------------|------------------|---------------------------------|-------------------------------|----------|--------|----------------------------------|-------------------|---------|---|------------------|----------------------|------------------------------|------------------------------|------------------------|------------------------------------------------------|
|                                                      |           |                               | Chr              | start position, bp <sup>b</sup> | end position, bp <sup>b</sup> | Size, kb | # SNPs | Best (local) SNP                 | Best SNP position | Alleles |   | Best SNP z-score | Best SNP Effect size | Best SNP Effect Lower 95% CI | Best SNP Effect Upper 95% CI | Best SNP p-value       | 1=Gene in LD (r <sup>2</sup> >0.5) with 21 lead SNPs |
| <b>KEGG - Cardiac muscle contraction - continued</b> |           |                               |                  |                                 |                               |          |        |                                  |                   |         |   |                  |                      |                              |                              |                        |                                                      |
| COX6A1                                               | 1337      | 0.03                          | 12               | 119,360,286                     | 119,362,912                   | 3        | 72     | rs12423303                       | 119,270,068       | a       | g | 3.444            | 0.398                | 0.183                        | 0.613                        | 5.74x10 <sup>-04</sup> | 0                                                    |
| CACNB2                                               | 783       | 0.03                          | 10               | 18,469,611                      | 18,870,694                    | 401      | 758    | rs17609633                       | 18,625,364        | t       | c | 4.015            | 0.476                | 0.255                        | 0.697                        | 5.94x10 <sup>-05</sup> | 0                                                    |
| CACNA1C                                              | 775       | 0.03                          | 12               | 2,032,676                       | 2,677,376                     | 645      | 829    | rs2238017                        | 2,048,806         | a       | g | 4.147            | 0.246                | 0.135                        | 0.356                        | 3.37x10 <sup>-05</sup> | 0                                                    |
| ATP1B2                                               | 482       | 0.04                          | 17               | 7,494,978                       | 7,501,814                     | 7        | 67     | rs2955617                        | 7,479,510         | c       | a | 3.340            | 0.191                | 0.084                        | 0.297                        | 8.37x10 <sup>-04</sup> | 0                                                    |
| TPM1                                                 | 7168      | 0.04                          | 15               | 61,121,890                      | 61,151,166                    | 29       | 257    | rs902025                         | 61,019,454        | a       | g | 3.609            | 0.249                | 0.120                        | 0.377                        | 3.08x10 <sup>-04</sup> | 0                                                    |
| <b>KEGG - Alzheimers disease</b>                     |           |                               |                  |                                 |                               |          |        |                                  |                   |         |   |                  |                      |                              |                              |                        |                                                      |
| CACNA1D                                              | 776       | 2.60x10 <sup>-05</sup>        | 3                | 53,504,070                      | 53,821,532                    | 317      | 431    | rs13080668                       | 53,418,394        | t       | c | 5.212            | 0.305                | 0.196                        | 0.414                        | 1.87x10 <sup>-07</sup> | 0                                                    |
| ATP2A2                                               | 488       | 4.00x10 <sup>-04</sup>        | 12               | 109,203,414                     | 109,273,280                   | 70       | 47     | rs6606684                        | 109,284,549       | t       | c | 4.276            | 0.282                | 0.159                        | 0.405                        | 1.90x10 <sup>-05</sup> | 0                                                    |
| NDUF88                                               | 4714      | 2.67x10 <sup>-03</sup>        | 10               | 102,273,486                     | 102,279,626                   | 6        | 108    | rs3750631                        | 102,269,284       | a       | g | 4.066            | 0.262                | 0.142                        | 0.382                        | 4.78x10 <sup>-05</sup> | 0                                                    |
| ATP5G1                                               | 516       | 5.84x10 <sup>-03</sup>        | 17               | 44,325,146                      | 44,328,231                    | 3        | 92     | rs606911                         | 44,263,227        | a       | g | 3.774            | 0.265                | 0.134                        | 0.395                        | 1.61x10 <sup>-04</sup> | 0                                                    |
| IDF                                                  | 3416      | 6.88x10 <sup>-03</sup>        | 10               | 94,203,579                      | 94,323,832                    | 120      | 129    | rs7910605                        | 94,229,773        | a       | g | 3.848            | 0.305                | 0.157                        | 0.453                        | 1.19x10 <sup>-04</sup> | 0                                                    |
| UQCRC1                                               | 7384      | 9.92x10 <sup>-03</sup>        | 3                | 48,611,435                      | 48,622,102                    | 11       | 52     | rs7633840                        | 48,694,642        | c       | t | 3.620            | 0.238                | 0.115                        | 0.361                        | 2.95x10 <sup>-02</sup> | 0                                                    |
| APH1A                                                | 51107     | 0.01                          | 1                | 148,504,422                     | 148,508,156                   | 4        | 90     | rs11806171                       | 148,577,451       | a       | c | 3.627            | 0.348                | 0.169                        | 0.527                        | 2.87x10 <sup>-04</sup> | 0                                                    |
| SDHA                                                 | 6389      | 0.01                          | 5                | 271,355                         | 309,814                       | 38       | 170    | rs2162869                        | 304,792           | g       | a | 3.795            | 0.342                | 0.174                        | 0.510                        | 1.48x10 <sup>-04</sup> | 0                                                    |
| ATP5B                                                | 506       | 0.01                          | 12               | 55,318,225                      | 55,326,119                    | 8        | 61     | rs2926743                        | 55,400,367        | a       | g | 3.631            | 0.225                | 0.110                        | 0.340                        | 2.83x10 <sup>-04</sup> | 0                                                    |
| APOE                                                 | 348       | 0.01                          | 19               | 50,100,878                      | 50,104,490                    | 4        | 76     | rs4803759                        | 50,019,299        | t       | c | 3.772            | 0.230                | 0.116                        | 0.343                        | 1.62x10 <sup>-04</sup> | 0                                                    |
| hCG_25371                                            | 440567    | 0.01                          | 1                | 16,006,243                      | 16,006,781                    | 1        | 69     | rs6668183                        | 16,046,401        | c       | g | 3.711            | 0.198                | 0.098                        | 0.297                        | 2.06x10 <sup>-04</sup> | 0                                                    |
| CALML5                                               | 51806     | 0.02                          | 10               | 5,530,659                       | 5,531,510                     | 1        | 127    | rs12098712                       | 5,601,911         | t       | c | 3.745            | 0.311                | 0.156                        | 0.465                        | 1.80x10 <sup>-04</sup> | 0                                                    |
| MAPK3                                                | 5595      | 0.02                          | 16               | 30,032,926                      | 30,042,131                    | 9        | 26     | rs2278557                        | 30,001,280        | c       | g | 3.394            | 0.190                | 0.086                        | 0.295                        | 6.88x10 <sup>-04</sup> | 0                                                    |
| ATP5F1                                               | 515       | 0.02                          | 1                | 111,793,265                     | 111,806,048                   | 13       | 171    | rs7737                           | 111,827,675       | t       | c | 3.770            | 0.313                | 0.158                        | 0.467                        | 1.63x10 <sup>-04</sup> | 0                                                    |
| COX6A1                                               | 1337      | 0.03                          | 12               | 119,360,286                     | 119,362,912                   | 3        | 72     | rs12423303                       | 119,270,068       | a       | g | 3.444            | 0.398                | 0.183                        | 0.613                        | 5.74x10 <sup>-04</sup> | 0                                                    |
| MAPK1                                                | 5594      | 0.03                          | 22               | 20,443,946                      | 20,551,970                    | 108      | 181    | rs13515                          | 20,445,886        | c       | t | 3.466            | 0.236                | 0.109                        | 0.362                        | 5.29x10 <sup>-04</sup> | 0                                                    |
| CACNA1C                                              | 775       | 0.03                          | 12               | 2,032,676                       | 2,677,376                     | 645      | 829    | rs2238017                        | 2,048,806         | a       | g | 4.147            | 0.246                | 0.135                        | 0.356                        | 3.37x10 <sup>-05</sup> | 0                                                    |
| NAE1                                                 | 8883      | 0.04                          | 16               | 65,394,281                      | 65,422,380                    | 28       | 82     | rs363170                         | 65,400,864        | a       | g | 3.360            | 0.326                | 0.145                        | 0.506                        | 7.79x10 <sup>-04</sup> | 0                                                    |
| <b>GO - Muscle contraction</b>                       |           |                               |                  |                                 |                               |          |        |                                  |                   |         |   |                  |                      |                              |                              |                        |                                                      |
| TTN                                                  | 7273      | <1.0x10 <sup>-16</sup>        | 2                | 179,098,963                     | 179,380,395                   | 281      | 366    | rs17362588                       | 179,429,291       | a       | g | 8.292            | 0.779                | 0.603                        | 0.954                        | 1.27x10 <sup>-16</sup> | 1                                                    |
| MYH6                                                 | 4624      | <1.0x10 <sup>-16</sup>        | 14               | 22,921,038                      | 22,947,322                    | 26       | 167    | rs365990                         | 22,931,651        | g       | a | 8.300            | 0.606                | 0.498                        | 0.715                        | 1.85x10 <sup>-25</sup> | 1                                                    |
| MYH7                                                 | 4625      | <1.0x10 <sup>-16</sup>        | 14               | 22,951,786                      | 22,974,710                    | 23       | 168    | rs365990                         | 22,931,651        | g       | a | 8.300            | 0.606                | 0.498                        | 0.715                        | 1.85x10 <sup>-25</sup> | 1                                                    |
| HCN4                                                 | 10021     | 7.77x10 <sup>-16</sup>        | 15               | 71,400,987                      | 71,448,230                    | 47       | 131    | rs4489968                        | 71,452,559        | t       | g | 7.375            | 0.529                | 0.395                        | 0.663                        | 1.65x10 <sup>-13</sup> | 1                                                    |
| GJA1                                                 | 2697      | 2.74x10 <sup>-12</sup>        | 6                | 121,798,443                     | 121,812,572                   | 14       | 171    | rs17083533                       | 121,772,421       | a       | g | 6.804            | 0.989                | 0.718                        | 1.260                        | 1.02x10 <sup>-11</sup> | 1                                                    |
| MYOT                                                 | 9499      | 2.06x10 <sup>-04</sup>        | 5                | 137,231,472                     | 137,251,440                   | 20       | 44     | rs7722600                        | 137,222,661       | a       | g | 4.427            | 0.303                | 0.175                        | 0.431                        | 9.55x10 <sup>-06</sup> | 0                                                    |
| MYH11                                                | 4629      | 3.62x10 <sup>-03</sup>        | 16               | 15,704,492                      | 15,858,388                    | 154      | 224    | rs3915499                        | 15,818,244        | a       | g | 4.188            | 0.235                | 0.130                        | 0.339                        | 2.81x10 <sup>-05</sup> | 0                                                    |
| CRYAB                                                | 1410      | 7.19x10 <sup>-03</sup>        | 11               | 111,284,559                     | 111,287,683                   | 3        | 48     | rs14133                          | 111,287,907       | g       | c | 3.706            | 0.221                | 0.110                        | 0.333                        | 2.10x10 <sup>-04</sup> | 0                                                    |
| DES                                                  | 1674      | 0.01                          | 2                | 219,991,342                     | 219,999,705                   | 8        | 78     | rs4674397                        | 220,010,793       | t       | c | 3.779            | 0.237                | 0.120                        | 0.353                        | 1.58x10 <sup>-04</sup> | 0                                                    |
| PXN                                                  | 5829      | 0.02                          | 12               | 119,132,632                     | 119,187,946                   | 55       | 98     | rs16950047                       | 119,213,881       | a       | c | 3.546            | 0.438                | 0.208                        | 0.668                        | 3.91x10 <sup>-04</sup> | 0                                                    |
| DAG1                                                 | 1605      | 0.02                          | 3                | 49,482,568                      | 49,548,052                    | 65       | 71     | rs3870341                        | 49,559,749        | g       | a | 3.501            | 0.216                | 0.101                        | 0.331                        | 4.64x10 <sup>-04</sup> | 0                                                    |
| ITGA1                                                | 3672      | 0.02                          | 5                | 52,119,892                      | 52,285,242                    | 165      | 512    | rs870992                         | 52,228,994        | a       | g | 4.029            | 0.389                | 0.209                        | 0.569                        | 5.61x10 <sup>-05</sup> | 0                                                    |
| GJA5                                                 | 2702      | 0.03                          | 1                | 145,694,955                     | 145,712,108                   | 17       | 189    | rs1495962                        | 145,808,661       | a       | c | 3.603            | 0.217                | 0.105                        | 0.330                        | 3.15x10 <sup>-04</sup> | 0                                                    |
| SCN5A                                                | 6331      | 0.04                          | 3                | 38,564,556                      | 38,666,167                    | 102      | 234    | rs7433306                        | 38,745,643        | g       | c | 3.665            | 0.196                | 0.096                        | 0.295                        | 2.47x10 <sup>-04</sup> | 0                                                    |
| TPM1                                                 | 7168      | 0.04                          | 15               | 61,121,890                      | 61,151,166                    | 29       | 257    | rs902025                         | 61,019,454        | a       | g | 3.609            | 0.249                | 0.120                        | 0.377                        | 3.08x10 <sup>-04</sup> | 0                                                    |
| <b>GO - Regulation of heart contraction</b>          |           |                               |                  |                                 |                               |          |        |                                  |                   |         |   |                  |                      |                              |                              |                        |                                                      |
| MYH6                                                 | 4624      | <1.0x10 <sup>-16</sup>        | 14               | 22,921,038                      | 22,947,322                    | 26       | 167    | rs365990                         | 22,931,651        | g       | a | 8.300            | 0.606                | 0.498                        | 0.715                        | 1.85x10 <sup>-25</sup> | 1                                                    |
| HCN4                                                 | 10021     | 7.77x10 <sup>-16</sup>        | 15               | 71,400,987                      | 71,448,230                    | 47       | 131    | rs4489968                        | 71,452,559        | t       | g | 7.375            | 0.529                | 0.395                        | 0.663                        | 1.65x10 <sup>-13</sup> | 1                                                    |
| CHRM2                                                | 1129      | 4.76x10 <sup>-05</sup>        | 7                | 136,203,938                     | 136,352,311                   | 148      | 315    | rs2350782                        | 136,293,174       | c       | t | 4.987            | 0.463                | 0.290                        | 0.636                        | 6.13x10 <sup>-07</sup> | 1                                                    |
| HSPB7                                                | 27129     | 1.36x10 <sup>-04</sup>        | 1                | 16,213,109                      | 16,217,872                    | 5        | 111    | rs1889785                        | 16,221,316        | a       | g | 4.589            | 0.255                | 0.151                        | 0.358                        | 4.45x10 <sup>-06</sup> | 0                                                    |
| DES                                                  | 1674      | 0.01                          | 2                | 219,991,342                     | 219,999,705                   | 8        | 78     | rs4674397                        | 220,010,793       | t       | c | 3.779            | 0.237                | 0.120                        | 0.353                        | 1.58x10 <sup>-04</sup> | 0                                                    |
| ADORA3                                               | 140       | 0.02                          | 1                | 111,827,492                     | 111,908,120                   | 81       | 218    | rs7737                           | 111,827,675       | t       | c | 3.770            | 0.313                | 0.158                        | 0.467                        | 1.63x10 <sup>-04</sup> | 0                                                    |
| SCN5A                                                | 6331      | 0.04                          | 3                | 38,564,556                      | 38,666,167                    | 102      | 234    | rs7433306                        | 38,745,643        | g       | c | 3.665            | 0.196                | 0.096                        | 0.295                        | 2.47x10 <sup>-04</sup> | 0                                                    |
| TPM1                                                 | 7168      | 0.04                          | 15               | 61,121,890                      | 61,151,166                    | 29       | 257    | rs902025                         | 61,019,454        | a       | g | 3.609            | 0.249                | 0.120                        | 0.377                        | 3.08x10 <sup>-04</sup> | 0                                                    |
| TGM2                                                 | 7052      | <1.0x10 <sup>-16</sup>        | 20               | 36,190,277                      | 36,227,114                    | 37       | 161    | rs6127471                        | 36,277,452        | c       | t | 8.300            | 0.509                | 0.408                        | 0.610                        | 6.52x10 <sup>-21</sup> | 1                                                    |
| FGF1                                                 | 2246      | 2.33x10 <sup>-03</sup>        | 5                | 141,953,305                     | 142,045,812                   | 93       | 258    | rs17099396                       | 142,077,501       | g       | a | 4.400            | 0.758                | 0.437                        | 1.079                        | 1.08x10 <sup>-05</sup> | 0                                                    |
| ITGA2                                                | 3673      | 0.01                          | 5                | 52,320,912                      | 52,426,366                    | 105      | 452    | rs870992                         | 52,228,994        | a       | g | 4.029            | 0.389                | 0.209                        | 0.569                        | 5.61x10 <sup>-05</sup> | 0                                                    |

Supplementary Table 19 - continued

| Gene Symbol                                        | Entrez ID | Adjusted P-value <sup>a</sup> | Gene information |                                 |                               |          |        | Heart rate stage 1 meta-analysis |                   |         |   |                  |                      |                              |                              |                        |                                                      |
|----------------------------------------------------|-----------|-------------------------------|------------------|---------------------------------|-------------------------------|----------|--------|----------------------------------|-------------------|---------|---|------------------|----------------------|------------------------------|------------------------------|------------------------|------------------------------------------------------|
|                                                    |           |                               | Chr              | start position, bp <sup>b</sup> | end position, bp <sup>b</sup> | Size, kb | # SNPs | Best (local) SNP                 | Best SNP position | Alleles |   | Best SNP z-score | Best SNP Effect size | Best SNP Effect Lower 95% CI | Best SNP Effect Upper 95% CI | Best SNP p-value       | 1=Gene in LD (r <sup>2</sup> >0.5) with 21 lead SNPs |
| <b>GO - Positive regulation of cell adhesion</b>   |           |                               |                  |                                 |                               |          |        |                                  |                   |         |   |                  |                      |                              |                              |                        |                                                      |
| <i>PRSS2</i>                                       | 5645      | 0.02                          | 7                | 142,178,777                     | 142,182,363                   | 4        | 108    | rs3114484                        | 142,200,133       | g       | t | 3.675            | 0.580                | 0.286                        | 0.874                        | 2.38x10 <sup>-04</sup> | 0                                                    |
| <i>VAV3</i>                                        | 10451     | 0.03                          | 1                | 107,915,304                     | 108,309,068                   | 394      | 684    | rs4557997                        | 107,993,913       | t       | c | 3.912            | 0.290                | 0.152                        | 0.428                        | 9.16x10 <sup>-05</sup> | 0                                                    |
| <i>TPM1</i>                                        | 7168      | 0.04                          | 15               | 61,121,890                      | 61,151,166                    | 29       | 257    | rs902025                         | 61,019,454        | a       | g | 3.609            | 0.249                | 0.120                        | 0.377                        | 3.08x10 <sup>-04</sup> | 0                                                    |
| <b>REACTOME - Integration of energy metabolism</b> |           |                               |                  |                                 |                               |          |        |                                  |                   |         |   |                  |                      |                              |                              |                        |                                                      |
| <i>TKT</i>                                         | 7086      | 3.36x10 <sup>-07</sup>        | 3                | 53,234,703                      | 53,264,998                    | 30       | 113    | rs2029213                        | 53,353,285        | c       | t | 5.371            | 0.296                | 0.193                        | 0.398                        | 7.85x10 <sup>-08</sup> | 0                                                    |
| <i>GNB4</i>                                        | 59345     | 2.39x10 <sup>-05</sup>        | 3                | 180,596,569                     | 180,652,065                   | 55       | 113    | rs7612445                        | 180,655,673       | g       | t | 4.912            | 0.360                | 0.223                        | 0.497                        | 9.03x10 <sup>-07</sup> | 1                                                    |
| <i>CACNA1D</i>                                     | 776       | 2.60x10 <sup>-05</sup>        | 3                | 53,504,070                      | 53,821,532                    | 317      | 431    | rs13080668                       | 53,418,394        | t       | c | 5.212            | 0.305                | 0.196                        | 0.414                        | 1.87x10 <sup>-07</sup> | 0                                                    |
| <i>GNB2</i>                                        | 2783      | 3.00x10 <sup>-05</sup>        | 7                | 100,109,310                     | 100,114,728                   | 5        | 36     | rs221794                         | 100,119,704       | t       | c | 4.656            | 0.350                | 0.210                        | 0.490                        | 3.23x10 <sup>-06</sup> | 0                                                    |
| <i>GNG11</i>                                       | 2791      | 1.61x10 <sup>-04</sup>        | 7                | 93,388,951                      | 93,393,762                    | 5        | 173    | rs180242                         | 93,387,532        | t       | a | 4.705            | 0.312                | 0.189                        | 0.436                        | 2.54x10 <sup>-06</sup> | 1                                                    |
| <i>PPP2R5D</i>                                     | 5528      | 7.35x10 <sup>-04</sup>        | 6                | 43,060,307                      | 43,088,058                    | 28       | 110    | rs3763236                        | 43,010,486        | c       | t | 4.248            | 0.230                | 0.129                        | 0.331                        | 2.15x10 <sup>-05</sup> | 0                                                    |
| <i>PPM2C</i>                                       | 54704     | 1.32x10 <sup>-03</sup>        | 8                | 94,998,337                      | 95,007,472                    | 9        | 126    | rs4735253                        | 94,973,166        | t       | a | 4.277            | 0.229                | 0.129                        | 0.329                        | 1.90x10 <sup>-05</sup> | 0                                                    |
| <i>PPP2R1B</i>                                     | 5519      | 1.88x10 <sup>-03</sup>        | 11               | 111,102,841                     | 111,142,379                   | 40       | 71     | rs11214003                       | 111,167,774       | c       | a | 3.989            | 0.247                | 0.132                        | 0.362                        | 6.62x10 <sup>-05</sup> | 0                                                    |
| <i>ATP5L</i>                                       | 10632     | 2.35x10 <sup>-03</sup>        | 11               | 117,777,313                     | 117,785,772                   | 8        | 87     | rs12274926                       | 117,800,327       | t       | c | 4.089            | 0.264                | 0.144                        | 0.385                        | 4.34x10 <sup>-05</sup> | 0                                                    |
| <i>NDUFB8</i>                                      | 4714      | 2.67x10 <sup>-03</sup>        | 10               | 102,273,486                     | 102,279,626                   | 6        | 108    | rs3750631                        | 102,269,284       | a       | g | 4.066            | 0.262                | 0.142                        | 0.382                        | 4.78x10 <sup>-05</sup> | 0                                                    |
| <i>ATP5G1</i>                                      | 516       | 5.84x10 <sup>-03</sup>        | 17               | 44,325,146                      | 44,328,231                    | 3        | 92     | rs606911                         | 44,263,227        | a       | g | 3.774            | 0.265                | 0.134                        | 0.395                        | 1.61x10 <sup>-04</sup> | 0                                                    |
| <i>UQCRC1</i>                                      | 7384      | 9.92x10 <sup>-03</sup>        | 3                | 48,611,435                      | 48,622,102                    | 11       | 52     | rs7633840                        | 48,694,642        | c       | t | 3.620            | 0.238                | 0.115                        | 0.361                        | 2.95x10 <sup>-04</sup> | 0                                                    |
| <i>SDHA</i>                                        | 6389      | 0.01                          | 5                | 271,355                         | 309,814                       | 38       | 170    | rs2162869                        | 304,792           | g       | a | 3.795            | 0.342                | 0.174                        | 0.510                        | 1.48x10 <sup>-04</sup> | 0                                                    |
| <i>ATP5B</i>                                       | 506       | 0.01                          | 12               | 55,318,225                      | 55,326,119                    | 8        | 61     | rs2926743                        | 55,400,367        | a       | g | 3.631            | 0.225                | 0.110                        | 0.340                        | 2.83x10 <sup>-04</sup> | 0                                                    |
| <i>ALDOA</i>                                       | 226       | 0.02                          | 16               | 29,971,991                      | 29,989,236                    | 17       | 56     | rs11642740                       | 29,968,156        | a       | g | 3.460            | 0.192                | 0.088                        | 0.295                        | 5.39x10 <sup>-04</sup> | 0                                                    |
| <i>ADCY3</i>                                       | 109       | 0.02                          | 2                | 24,895,541                      | 24,995,559                    | 100      | 227    | rs2891409                        | 24,870,861        | t       | g | 3.685            | 0.225                | 0.111                        | 0.339                        | 2.29x10 <sup>-04</sup> | 0                                                    |
| <i>ATP5F1</i>                                      | 515       | 0.02                          | 1                | 111,793,265                     | 111,806,048                   | 13       | 171    | rs7737                           | 111,827,675       | t       | c | 3.770            | 0.313                | 0.158                        | 0.467                        | 1.63x10 <sup>-04</sup> | 0                                                    |
| <i>PRKAR2A</i>                                     | 5576      | 0.02                          | 3                | 48,763,096                      | 48,860,274                    | 97       | 58     | rs9882443                        | 48,724,068        | a       | g | 3.517            | 0.224                | 0.105                        | 0.343                        | 4.37x10 <sup>-04</sup> | 0                                                    |
| <i>COX6A1</i>                                      | 1337      | 0.03                          | 12               | 119,360,286                     | 119,362,912                   | 3        | 72     | rs12423303                       | 119,270,068       | a       | g | 3.444            | 0.398                | 0.183                        | 0.613                        | 5.74x10 <sup>-04</sup> | 0                                                    |
| <i>CACNB2</i>                                      | 783       | 0.03                          | 10               | 18,469,611                      | 18,870,694                    | 401      | 758    | rs17609633                       | 18,625,364        | t       | c | 4.015            | 0.476                | 0.255                        | 0.697                        | 5.94x10 <sup>-05</sup> | 0                                                    |
| <i>PGAM1</i>                                       | 5223      | 0.03                          | 10               | 99,176,016                      | 99,183,188                    | 7        | 101    | rs2236575                        | 99,215,728        | a       | t | 3.507            | 0.187                | 0.087                        | 0.286                        | 4.53x10 <sup>-04</sup> | 0                                                    |
| <i>CACNA1C</i>                                     | 775       | 0.03                          | 12               | 2,032,676                       | 2,677,376                     | 645      | 829    | rs2238017                        | 2,048,806         | a       | g | 4.147            | 0.246                | 0.135                        | 0.356                        | 3.37x10 <sup>-05</sup> | 0                                                    |
| <i>SLC25A20</i>                                    | 788       | 0.03                          | 3                | 48,869,359                      | 48,911,406                    | 42       | 45     | rs7621226                        | 48,903,763        | c       | t | 3.338            | 0.218                | 0.096                        | 0.339                        | 8.43x10 <sup>-04</sup> | 0                                                    |
| <i>PDP2</i>                                        | 57546     | 0.04                          | 16               | 65,471,936                      | 65,479,356                    | 7        | 74     | rs363170                         | 65,400,864        | a       | g | 3.360            | 0.326                | 0.145                        | 0.506                        | 7.79x10 <sup>-04</sup> | 0                                                    |

<sup>a</sup> The adjusted gene association p-value is based on the heart rate meta-analysis association p-value of the most significant SNP of each gene's regional SNPs (within 110kb upstream and 40 kb downstream of each gene's most extreme transcript boundaries), followed by correcting for confounders (gene size, SNP density, estimated number of independent SNPs (in linkage equilibrium) per kb and number of hotspots per kb) using step-wise multivariate regression analysis (Segrè et al, 2010 [PMID 20714348]). Scores are listed only for genes that lie above the enrichment cutoff (95 percentile of all gene p-values in the genome was used here), a subset of which are predicted to be truly associated with heart rate. <sup>b</sup> Chromosome positions are based on build 36 / hg18. Genes are ordered by ascending adjusted p-values.

**Supplementary Table 20 - Genes located within heart rate loci that are expressed in mouse heart at the protein level**

| <b>Locus</b> | <b>Gene</b>                                                            |
|--------------|------------------------------------------------------------------------|
| 1            | <b>MYH6</b><br>MYH7<br>ZFHX2<br>ACIN1<br>CDH24<br>PSMB5                |
| 2            | GJA1                                                                   |
| 3            | SRRT<br>GIGYF1<br>GNB2<br>TRIM56<br>CLDN15<br>FIS1<br>TSC22D4<br>MEPCE |
| 4            | CD34<br>PLXNA2                                                         |
| 5            | DAGLA<br>SYT7<br>CPSF7<br>DDB1                                         |
| 6            | <b>PLN</b>                                                             |
| 8            | RPRD1B<br>RPSA<br>TGM2                                                 |
| 9            | <b>TTN</b><br>PRKRA<br>CCDC141                                         |
| 11           | NEO1                                                                   |
| 12           | MFN1<br>ACTL6A<br>MRPL47<br>NDUFB5                                     |
| 14           | CHRM2                                                                  |
| 16           | BET1<br>COL1A2                                                         |
| 17           | <b>NCL</b><br>PSMD1                                                    |
| 18           | FNDC3B                                                                 |
| 19           | RIC8B<br>TCP11L2                                                       |

Genes shown in bold are phosphorylated upon stimulation of the  $\beta$ 1 adrenergic receptor, suggesting that these genes are relevant for heart rate regulation.



**Supplementary Table 21 – Significant associations between heart rate loci and *cis* gene expression (*cis*-eQTLs) in blood**

| Locus | Heart rate SNP | Chr | EA | OA | Gene                 | Effect | p-value                | p <sub>adj-1</sub>     | Peak SNP   | r <sup>2</sup> | p-value                | p <sub>adj-2</sub>     |
|-------|----------------|-----|----|----|----------------------|--------|------------------------|------------------------|------------|----------------|------------------------|------------------------|
| 3     | rs13245899     | 7   | g  | a  | <i>TRIP6</i>         | -      | 6.63x10 <sup>-11</sup> | 0.87                   | rs314370   | 0.913          | 8.96x10 <sup>-13</sup> | 0.20                   |
| 5     | rs174549       | 11  | a  | g  | <i>C11orf10</i>      | +      | 9.68x10 <sup>-13</sup> | 0.10                   | rs174534   | 0.607          | 2.19x10 <sup>-13</sup> | 0.02                   |
|       |                |     |    |    | <i>FADS1</i>         | +      | 3.42x10 <sup>-11</sup> | 0.11                   | rs968567   | 0.504          | 2.87x10 <sup>-13</sup> | 0.01                   |
|       |                |     |    |    | <i>BEST1 / FTH1</i>  | +      | 2.11x10 <sup>-06</sup> | 0.06                   | rs3758977  | 0.074          | 1.50x10 <sup>-31</sup> | 1.50x10 <sup>-25</sup> |
|       |                |     |    |    | <i>FADS2</i>         | +      | 2.78x10 <sup>-06</sup> | 0.81                   | rs968567   | 0.504          | 9.56x10 <sup>-11</sup> | 1.82x10 <sup>-03</sup> |
|       |                |     |    |    | <i>RAB3IL1</i>       | +      | 1.02x10 <sup>-05</sup> | 4.87x10 <sup>-05</sup> | rs2524287  | 0.002          | 1.72x10 <sup>-13</sup> | 9.59x10 <sup>-13</sup> |
| 6     | rs11153730     | 6   | t  | c  | <i>CEP85L</i>        | -      | 1.53x10 <sup>-11</sup> | 0.65                   | rs11970286 | 0.894          | 1.53x10 <sup>-11</sup> | 0.70                   |
| 16    | rs180242       | 7   | t  | a  | <i>GNG11</i>         | +      | 1.60x10 <sup>-03</sup> | 7.32x10 <sup>-03</sup> | rs180284   | 0.012          | 6.66x10 <sup>-09</sup> | 6.66x10 <sup>-09</sup> |
| 17    | rs13030174     | 2   | c  | a  | <i>NCL / SNORD20</i> | +      | 8.56x10 <sup>-04</sup> | 0.63                   | rs10445829 | 0.181          | 3.57x10 <sup>-08</sup> | 1.37x10 <sup>-04</sup> |

Effect, direction of effect for the allele associated with higher heart rate (EA); p-value, p-value for the heart rate-associated SNP; p<sub>adj-1</sub>, p-value for the heart rate-associated SNP after conditioning on the most significant SNP for the gene transcript (Peak SNP); r<sup>2</sup>, LD between the heart rate-associated SNP and the peak SNP; p<sub>adj-2</sub>, P-value for the peak SNP after conditioning on the heart rate-associated SNP.

**Supplementary Table 22 – Potentially functional variants in LD with heart rate-associated SNPs**

| locus | Heart rate SNP | Potentially functional variant | $r^2$ | Gene                             | Type                              | Coding change | subPSEC | P_deleterious |
|-------|----------------|--------------------------------|-------|----------------------------------|-----------------------------------|---------------|---------|---------------|
| 1     | rs365990       | rs365990                       | 1     | <i>MYH6</i>                      | Non-synonymous                    | Ala1101Val    | -1.79   | 0.229         |
| 3     | rs13245899     | rs12666989                     | 0.87  | <i>UFSP1</i>                     | Non-synonymous                    | Leu47Val      | -0.99   | 0.118         |
| 6     | rs11153730     | rs4945623                      | 0.84  | <i>CEP85L</i>                    | Transcription Factor Binding Site |               |         |               |
| 8     | rs6127471      | rs3746471                      | 1     | <i>KIAA1755</i>                  | Non-synonymous                    | Arg1045Trp    | -4.60   | 0.832         |
| 9     | rs17362588     | rs17362588                     | 1     | <i>CCDC141</i>                   | Non-synonymous                    | Trp360Arg     |         | NA            |
| 16    | rs180242       | P2_M_061510_7_474              | 0.96  | near <i>GNGT1</i> / <i>GNG11</i> | Deletion (723 bp)                 |               |         |               |
| 17    | rs13030174     | rs2290130                      | 1     | <i>B3GNT7</i>                    | Non-synonymous                    | Val233Ile     | -2.01   | 0.272         |
| 21    | rs4140885      | rs7586970                      | 1     | <i>TFPI</i>                      | Non-synonymous                    | Ser221Asn     |         | NA            |

$r^2$ , LD between the heart rate-associated SNP and the potential functional variant; coding change, amino-acid change resulting from non-synonymous SNPs. The first amino acid is encoded by the allele associated with higher heart rate; subPSEC score, the negative logarithm of the probability ratio of the wild-type and mutant amino acids at a particular position as calculated by PANTHER (Thomas et al, 2003 [PMID 12952881]). P\_deleterious, the probability that a given variant will have a deleterious effect on protein function. For rs17362588 and rs7586970, the position does not align (NA) to the Hidden Markov Model (HMM), indicating that the substitution occurs at a position that is inserted relative to the consensus HMM for the given HMM. In most cases, these substitutions are unlikely to be deleterious ([http://pantherdb.org/tips/tips\\_csnpscores.jsp](http://pantherdb.org/tips/tips_csnpscores.jsp)).

**Supplementary Table 23 - PubMed and OMIM hits for genes within 500kb of the 21 confirmed heart rate loci, using the search term 'heart'**

| Gene           | Heart rate SNP | Chr | Position    | Distance SNP- gene | PubMed hit with search term 'heart'                                                                                                                                                                                                                                                                                                                                                                |
|----------------|----------------|-----|-------------|--------------------|----------------------------------------------------------------------------------------------------------------------------------------------------------------------------------------------------------------------------------------------------------------------------------------------------------------------------------------------------------------------------------------------------|
| <b>Locus 1</b> |                |     |             |                    |                                                                                                                                                                                                                                                                                                                                                                                                    |
| MYH6           | rs365990       | 14  | 22,931,651  | 0                  | Abu-Daya A et al. "Absence of heartbeat in the <i>Xenopus tropicalis</i> mutation muzak is caused by a nonsense mutation in cardiac myosin myh6." <i>Dev Biol.</i> 2009 Dec 1;336(1):20-9. PMID 19769958                                                                                                                                                                                           |
| MYH6           | rs365990       | 14  | 22,931,651  | 0                  | Ghosh TK et al. "Physical interaction between TBX5 and MEF2C is required for early heart development." <i>Mol Cell Biol.</i> 2009 Apr;29(8):2205-18. PMID 19204083                                                                                                                                                                                                                                 |
| MYH6           | rs365990       | 14  | 22,931,651  | 0                  | Granados-Riveron JT et al. "Alpha-cardiac myosin heavy chain (MYH6) mutations affecting myofibril formation are associated with congenital heart defects." <i>Hum Mol Genet.</i> 2010 Oct 15;19(20):4007-16. PMID 20656787                                                                                                                                                                         |
| MYH6           | rs365990       | 14  | 22,931,651  | 0                  | Gupta M et al. "Single-stranded DNA-binding proteins PURalpha and PURbeta bind to a purine-rich negative regulatory element of the alpha-myosin heavy chain gene and control transcriptional and translational regulation of the gene expression. Implications in the repression of alpha-myosin heavy chain during heart failure." <i>J Biol Chem.</i> 2003 Nov 7;278(45):44935-48. PMID 12933792 |
| MYH6           | rs365990       | 14  | 22,931,651  | 0                  | Hang CT et al. "Chromatin regulation by Brg1 underlies heart muscle development and disease." <i>Nature.</i> 2010 Jul 1;466(7302):62-7. PMID 20596014                                                                                                                                                                                                                                              |
| MYH6           | rs365990       | 14  | 22,931,651  | 0                  | Howarth FC et al. "Changing pattern of gene expression is associated with ventricular myocyte dysfunction and altered mechanisms of Ca <sup>2+</sup> signalling in young type 2 Zucker diabetic fatty rat heart." <i>Exp Physiol.</i> 2011 Mar;96(3):325-37. PMID 21216827                                                                                                                         |
| MYH6           | rs365990       | 14  | 22,931,651  | 0                  | Lv H et al. "Impaired thymic tolerance to $\alpha$ -myosin directs autoimmunity to the heart in mice and humans." <i>J Clin Invest.</i> 2011 Mar 23. PMID 21436590                                                                                                                                                                                                                                 |
| MYH6           | rs365990       | 14  | 22,931,651  | 0                  | Matkovich SJ et al. "MicroRNA-133a protects against myocardial fibrosis and modulates electrical repolarization without affecting hypertrophy in pressure-overloaded adult hearts." <i>Circ Res.</i> 2010 Jan 8;106(1):166-75. PMID 19893015                                                                                                                                                       |
| MYH6           | rs365990       | 14  | 22,931,651  | 0                  | Nakao K et al. "Myosin heavy chain gene expression in human heart failure." <i>J Clin Invest.</i> 1997 Nov 1;100(9):2362-70. PMID 9410916                                                                                                                                                                                                                                                          |
| MYH7           | rs365990       | 14  | 22,931,651  | 20,136             | Gupta M et al. "Single-stranded DNA-binding proteins PURalpha and PURbeta bind to a purine-rich negative regulatory element of the alpha-myosin heavy chain gene and control transcriptional and translational regulation of the gene expression. Implications in the repression of alpha-myosin heavy chain during heart failure." <i>J Biol Chem.</i> 2003 Nov 7;278(45):44935-48. PMID 12933792 |
| MYH7           | rs365990       | 14  | 22,931,651  | 20,136             | Hang CT et al. "Chromatin regulation by Brg1 underlies heart muscle development and disease." <i>Nature.</i> 2010 Jul 1;466(7302):62-7. PMID 20596014                                                                                                                                                                                                                                              |
| MYH7           | rs365990       | 14  | 22,931,651  | 20,136             | Howarth FC et al. "Changing pattern of gene expression is associated with ventricular myocyte dysfunction and altered mechanisms of Ca <sup>2+</sup> signalling in young type 2 Zucker diabetic fatty rat heart." <i>Exp Physiol.</i> 2011 Mar;96(3):325-37. PMID 21216827                                                                                                                         |
| MYH7           | rs365990       | 14  | 22,931,651  | 20,136             | Kamisago M et al. "Sarcomere protein gene mutations and inherited heart disease: a beta-cardiac myosin heavy chain mutation causing endocardial fibroelastosis and heart failure." <i>Novartis Found Symp.</i> 2006;274:176-89; discussion 189-95, 272-6. PMID 17019812                                                                                                                            |
| MYH7           | rs365990       | 14  | 22,931,651  | 20,136             | Kong SW et al. "Heart failure-associated changes in RNA splicing of sarcomere genes." <i>Circ Cardiovasc Genet.</i> 2010 Apr;3(2):138-46. PMID 20124440                                                                                                                                                                                                                                            |
| MYH7           | rs365990       | 14  | 22,931,651  | 20,136             | Morita H et al. "Single-gene mutations and increased left ventricular wall thickness in the community: the Framingham Heart Study." <i>Circulation.</i> 2006 Jun 13;113(23):2697-705. PMID 16754800                                                                                                                                                                                                |
| MYH7           | rs365990       | 14  | 22,931,651  | 20,136             | Will RD et al. "Myomasp/LRRC39, a heart- and muscle-specific protein, is a novel component of the sarcomeric M-band and is involved in stretch sensing." <i>Circ Res.</i> 2010 Nov 12;107(10):1253-64. PMID 20847312                                                                                                                                                                               |
| <b>Locus 2</b> |                |     |             |                    |                                                                                                                                                                                                                                                                                                                                                                                                    |
| GJA1           | rs1015451      | 6   | 122,173,184 | 360,612            | Ai X et al. "Connexin 43 downregulation and dephosphorylation in nonischemic heart failure is associated with enhanced colocalized protein phosphatase type 2A." <i>Circ Res.</i> 2005 Jan 7;96(1):54-63. PMID 15576650                                                                                                                                                                            |
| GJA1           | rs1015451      | 6   | 122,173,184 | 360,612            | Antzelevitch C et al. "M cells in the human heart." <i>Circ Res.</i> 2010 Mar 19;106(5):815-7. PMID 20299671                                                                                                                                                                                                                                                                                       |
| GJA1           | rs1015451      | 6   | 122,173,184 | 360,612            | Bowling N et al. "Protein kinase C-alpha and -epsilon modulate connexin-43 phosphorylation in human heart." <i>J Mol Cell Cardiol.</i> 2001 Apr;33(4):789-98. PMID 11273731                                                                                                                                                                                                                        |
| GJA1           | rs1015451      | 6   | 122,173,184 | 360,612            | Bruce AF et al. "Gap junction remodelling in human heart failure is associated with increased interaction of connexin43 with ZO-1." <i>Cardiovasc Res.</i> 2008 Mar 1;77(4):757-65. PMID 18056766                                                                                                                                                                                                  |
| GJA1           | rs1015451      | 6   | 122,173,184 | 360,612            | Chen P et al. "Mutations of connexin43 in fetuses with congenital heart malformations." <i>Chin Med J (Engl).</i> 2005 Jun 20;118(12):971-6. PMID 15978203                                                                                                                                                                                                                                         |
| GJA1           | rs1015451      | 6   | 122,173,184 | 360,612            | Hesketh GG et al. "Ultrastructure and regulation of lateralized connexin43 in the failing heart." <i>Circ Res.</i> 2010 Apr 2;106(6):1153-63. PMID 20167932                                                                                                                                                                                                                                        |
| GJA1           | rs1015451      | 6   | 122,173,184 | 360,612            | Kim SK et al. "Cardiac cell therapy with mesenchymal stem cell induces cardiac nerve sprouting, angiogenesis, and reduced connexin43-positive gap junctions, but concomitant electrical pacing increases connexin43-positive gap junctions in canine heart." <i>Cardiol Young.</i> 2010 Jun;20(3):308-17. PMID 20346202                                                                            |
| GJA1           | rs1015451      | 6   | 122,173,184 | 360,612            | Kostin S et al. "Zonula occludens-1 and connexin 43 expression in the failing human heart." <i>J Cell Mol Med.</i> 2007 Jul-Aug;11(4):892-5. PMID 17760848                                                                                                                                                                                                                                         |
| GJA1           | rs1015451      | 6   | 122,173,184 | 360,612            | Martinez-Fernandez A et al. "iPS programmed without c-MYC yield proficient cardiogenesis for functional heart chimerism." <i>Circ Res.</i> 2009 Sep 25;105(7):648-56. PMID 19696409                                                                                                                                                                                                                |
| GJA1           | rs1015451      | 6   | 122,173,184 | 360,612            | Pavlovic M et al. "Reduced atrial connexin43 expression after pediatric heart surgery." <i>Biochem Biophys Res Commun.</i> 2006 Mar 31;342(1):310-5. PMID 16480955                                                                                                                                                                                                                                 |
| GJA1           | rs1015451      | 6   | 122,173,184 | 360,612            | Vetter C et al. "Connexin 43 expression in human hypertrophied heart due to pressure and volume overload." <i>Physiol Res.</i> 2010;59(1):35-42. PMID 19249908                                                                                                                                                                                                                                     |
| GJA1           | rs1015451      | 6   | 122,173,184 | 360,612            | Wang B et al. "Mutation analysis of Connexon43 gene in Chinese patients with congenital heart defects." <i>Int J Cardiol.</i> 2010 Dec 3;145(3):487-9. PMID 19615768                                                                                                                                                                                                                               |
| GJA1           | rs1015451      | 6   | 122,173,184 | 360,612            | Yoshida K et al. "Pursuing enigmas on ischemic heart disease and sudden cardiac death." <i>Leg Med (Tokyo).</i> 2009 Mar;11(2):51-8. PMID 19042146                                                                                                                                                                                                                                                 |
| <b>Locus 3</b> |                |     |             |                    |                                                                                                                                                                                                                                                                                                                                                                                                    |
| ACHE           | rs13245899     | 7   | 100,335,067 | 3,590              | Collins P et al. "Gender Differences in the Clinical Presentation of Heart Disease." <i>Curr Pharm Des.</i> 2011 Mar 31; PMID 21449890                                                                                                                                                                                                                                                             |
| ACHE           | rs13245899     | 7   | 100,335,067 | 3,590              | Danese C et al. "Takotsubo syndrome and brachydactyly: a new heart-hand syndrome?." <i>Clin Ter.</i> 2011 Jan-Feb;162(1):41-4. PMID 21448545                                                                                                                                                                                                                                                       |
| EPHB4          | rs13245899     | 7   | 100,335,067 | 71,988             | Xie J et al. "Endothelial-specific expression of WNK1 kinase is essential for angiogenesis and heart development in mice." <i>Am J Pathol.</i> 2009 Sep;175(3):1315-27. PMID 19644017                                                                                                                                                                                                              |
| TIMP1          | rs13245899     | 7   | 100,335,067 | 175,808            | Aljabri MB et al. "Gene expression, function and ischemia tolerance in male and female rat hearts after sub-toxic levels of angiotensin II." <i>Cardiovasc Toxicol.</i> 2011 Mar;11(1):38-47. PMID 21170686                                                                                                                                                                                        |

Supplementary Table 23 - continued

| Gene           | Heart rate SNP | Chr | Position    | Distance SNP-gene | Pubmed hit with search term 'heart'                                                                                                                                                                                                                                                                                                                                                    |
|----------------|----------------|-----|-------------|-------------------|----------------------------------------------------------------------------------------------------------------------------------------------------------------------------------------------------------------------------------------------------------------------------------------------------------------------------------------------------------------------------------------|
| <i>TIMP1</i>   | rs13245899     | 7   | 100,335,067 | 175,808           | Barton PJ et al. "Increased expression of extracellular matrix regulators TIMP1 and MMP1 in deteriorating heart failure." J Heart Lung Transplant. 2003 Jul;22(7):738-44. PMID 12873541                                                                                                                                                                                                |
| <i>TIMP1</i>   | rs13245899     | 7   | 100,335,067 | 175,808           | Battle M et al. "Down-regulation of matrix metalloproteinase-9 (MMP-9) expression in the myocardium of congestive heart failure patients." Transplant Proc. 2007 Sep;39(7):2344-6. PMID 17889183                                                                                                                                                                                       |
| <i>TIMP1</i>   | rs13245899     | 7   | 100,335,067 | 175,808           | Heymans S et al. "Increased cardiac expression of tissue inhibitor of metalloproteinase-1 and tissue inhibitor of metalloproteinase-2 is related to cardiac fibrosis and dysfunction in the chronic pressure-overloaded human heart." Circulation. 2005 Aug 23;112(8):1136-44. PMID 16103240                                                                                           |
| <i>TIMP1</i>   | rs13245899     | 7   | 100,335,067 | 175,808           | Kim YJ et al. "Effect of propofol on cardiac function and gene expression after ischemic-reperfusion in isolated rat heart." Korean J Anesthesiol. 2010 Feb;58(2):153-61. PMID 20498794                                                                                                                                                                                                |
| <i>TIMP1</i>   | rs13245899     | 7   | 100,335,067 | 175,808           | Milting H et al. "Plasma biomarkers of myocardial fibrosis and remodeling in terminal heart failure patients supported by mechanical circulatory support devices." J Heart Lung Transplant. 2008 Jun;27(6):589-96. PMID 18503956                                                                                                                                                       |
| <i>TIMP1</i>   | rs13245899     | 7   | 100,335,067 | 175,808           | Polyakova V et al. "Fibrosis in endstage human heart failure: Severe changes in collagen metabolism and MMP/TIMP profiles." Int J Cardiol. 2010 May 21; PMID 20546954                                                                                                                                                                                                                  |
| <i>TIMP1</i>   | rs13245899     | 7   | 100,335,067 | 175,808           | Vo TK et al. "Transcriptomic biomarkers of the response of hospitalized geriatric patients admitted with heart failure. Comparison to hospitalized geriatric patients with infectious diseases or hip fracture." Mech Ageing Dev. 2011 Mar;132(3):131-9. PMID 21335025                                                                                                                 |
| <i>TIMP1</i>   | rs13245899     | 7   | 100,335,067 | 175,808           | Weiss TW et al. "The gp130 ligand oncostatin M regulates tissue inhibitor of metalloproteinases-1 through ERK1/2 and p38 in human adult cardiac myocytes and in human adult cardiac fibroblasts: a possible role for the gp130/gp130 ligand system in the modulation of extracellular matrix degradation in the human heart." J Mol Cell Cardiol. 2005 Sep;39(3):545-51. PMID 15890357 |
| <i>SERBP1</i>  | rs13245899     | 7   | 100,335,067 | 273,248           | Brazionis L et al. "Plasminogen activator inhibitor-1 activity in type 2 diabetes: a different relationship with coronary heart disease and diabetic retinopathy." Arterioscler Thromb Vasc Biol. 2008 Apr;28(4):786-91. PMID 18239151                                                                                                                                                 |
| <i>SERBP1</i>  | rs13245899     | 7   | 100,335,067 | 273,248           | Mi X et al. "Structural equation modeling of gene-environment interactions in coronary heart disease." Ann Hum Genet. 2011 Mar;75(2):255-65. PMID 21241273                                                                                                                                                                                                                             |
| <i>PCOLCE</i>  | rs13245899     | 7   | 100,335,067 | 291,333           | Kessler-Icekson G et al. "Expression of procollagen C-proteinase enhancer-1 in the remodeling rat heart is stimulated by aldosterone." Int J Biochem Cell Biol. 2006 Mar;38(3):358-65. PMID 16300990                                                                                                                                                                                   |
| <i>PCOLCE</i>  | rs13245899     | 7   | 100,335,067 | 291,333           | Shalitin N et al. "Expression of procollagen C-proteinase enhancer in cultured rat heart fibroblasts: evidence for co-regulation with type I collagen." J Cell Biochem. 2003 Oct 1;90(2):397-407. PMID 14505355                                                                                                                                                                        |
| <i>FIS1</i>    | rs13245899     | 7   | 100,335,067 | 385,762           | Jazbutyte V et al. "Mitochondrial dynamics: molecular mechanisms and the role in the heart." Minerva Cardioangiol. 2010 Apr;58(2):231-9. PMID 20440252                                                                                                                                                                                                                                 |
| <b>Locus 4</b> |                |     |             |                   |                                                                                                                                                                                                                                                                                                                                                                                        |
| <i>CD46</i>    | rs11118555     | 1   | 206,007,476 | 0                 | Qv J et al. "Activation of complement in the discordant heart xenotransplantation of pig-to-monkey model and the impact of intrathymic inoculation of xenogeneic antigen combined with whole-body gamma-radiation." Transplant Proc. 2009 Nov;41(9):3905-8. PMID 19917409                                                                                                              |
| <i>CD46</i>    | rs11118555     | 1   | 206,007,476 | 0                 | Mañez R et al. "Transgenic expression in pig hearts of both human decay-accelerating factor and human membrane cofactor protein does not provide an additional benefit to that of human decay-accelerating factor alone in pig-to-baboon xenotransplantation." Transplantation. 2004 Sep 27;78(6):930-3. PMID 15385816                                                                 |
| <i>CD46</i>    | rs11118555     | 1   | 206,007,476 | 0                 | Toivonen R et al. "Dilated cardiomyopathy alters the expression patterns of CAR and other adenoviral receptors in human heart." Histochem Cell Biol. 2010 Mar;133(3):349-57. PMID 19957088                                                                                                                                                                                             |
| <i>CD34</i>    | rs11118555     | 1   | 206,007,476 | 44,382            | Carvalho VO et al. "Correlation between CD34+ and exercise capacity, functional class, quality of life and norepinephrine in heart failure patients." Cardiol J. 2009;16(5):426-31. PMID 19753521                                                                                                                                                                                      |
| <i>CD34</i>    | rs11118555     | 1   | 206,007,476 | 44,382            | Van Craenenbroeck EM et al. "The effect of acute exercise on endothelial progenitor cells is attenuated in chronic heart failure." Eur J Appl Physiol. 2011 Feb 3; PMID 21290145                                                                                                                                                                                                       |
| <i>CD34</i>    | rs11118555     | 1   | 206,007,476 | 44,382            | Rivas J et al. "[Usefulness of intracoronary therapy with progenitor cells in patients with dilated cardiomyopathy: Bridge or alternative to heart transplantation?]." An Pediatr (Barc). 2011 Mar 11; PMID 21398194                                                                                                                                                                   |
| <i>CR1</i>     | rs11118555     | 1   | 206,007,476 | 125,743           | Maegdefessel L et al. "Patients with insulin-dependent diabetes or coronary heart disease following rehabilitation express serum fractalkine levels similar to those in healthy control subjects." Vasc Health Risk Manag. 2009;5:849-57. PMID 19851523                                                                                                                                |
| <i>CD55</i>    | rs11118555     | 1   | 206,007,476 | 406,542           | Ashton-Chess J et al. "Cellular participation in delayed xenograft rejection of hCD55 transgenic pig hearts by baboons." Xenotransplantation. 2003 Sep;10(5):446-53. PMID 12950987                                                                                                                                                                                                     |
| <i>CD55</i>    | rs11118555     | 1   | 206,007,476 | 406,542           | Brandl U et al. "Combining the hDAF transgene with the GP IIB/IIIa inhibitor tirofiban improves heart performance and reduces myocardial damage following hyperacute rejection in an ex vivo perfusion model." Transplant Proc. 2005 Jan-Feb;37(1):491-2. PMID 15808686                                                                                                                |
| <i>CD55</i>    | rs11118555     | 1   | 206,007,476 | 406,542           | Brandl U et al. "Fluorescent microspheres reveal different regional blood flow in hyperacutely rejected nontransgenic and hDAF pig hearts." Transplant Proc. 2006 Apr;38(3):733-4. PMID 16647457                                                                                                                                                                                       |
| <i>CD55</i>    | rs11118555     | 1   | 206,007,476 | 406,542           | Brandl U et al. "Reduced fibrin deposition and intravascular thrombosis in hDAF transgenic pig hearts perfused with tirofiban." Transplantation. 2007 Dec 27;84(12):1667-76. PMID 18165780                                                                                                                                                                                             |
| <i>CD55</i>    | rs11118555     | 1   | 206,007,476 | 406,542           | Brenner P et al. "Combination of hDAF-transgenic pig hearts and immunoadsorption in heterotopic xenotransplantation of immunosuppressed baboons." Transplant Proc. 2005 Jan-Feb;37(1):483-6. PMID 15808683                                                                                                                                                                             |
| <i>CD55</i>    | rs11118555     | 1   | 206,007,476 | 406,542           | Brenner P et al. "Mean xenograft survival of 14.6 days in a small group of hDAF-transgenic pig hearts transplanted orthotopically into baboons." Transplant Proc. 2005 Jan-Feb;37(1):472-6. PMID 15808680                                                                                                                                                                              |
| <i>CD55</i>    | rs11118555     | 1   | 206,007,476 | 406,542           | Mañez R et al. "Transgenic expression in pig hearts of both human decay-accelerating factor and human membrane cofactor protein does not provide an additional benefit to that of human decay-accelerating factor alone in pig-to-baboon xenotransplantation." Transplantation. 2004 Sep 27;78(6):930-3. PMID 15385816                                                                 |
| <i>CD55</i>    | rs11118555     | 1   | 206,007,476 | 406,542           | Verbakel CA et al. "Human decay-accelerating factor expressed on rat hearts inhibits leukocyte adhesion." Transpl Int. 2003 Mar;16(3):168-72. PMID 12664211                                                                                                                                                                                                                            |

Supplementary Table 23 - continued

| Gene            | Heart rate SNP | Chr | Position    | Distance SNP- gene | Pubmed hit with search term 'heart'                                                                                                                                                                                                                  |
|-----------------|----------------|-----|-------------|--------------------|------------------------------------------------------------------------------------------------------------------------------------------------------------------------------------------------------------------------------------------------------|
| <b>Locus 6</b>  |                |     |             |                    |                                                                                                                                                                                                                                                      |
| <i>PLN</i>      | rs11157370     | 6   | 118,774,215 | 201,920            | Ferreira JC et al. "Angiotensin receptor blockade improves the net balance of cardiac Ca(2+) handling-related proteins in sympathetic hyperactivity-induced heart failure." <i>Life Sci.</i> 2011 Mar 28;88(13-14):578-85. PMID 21277865             |
| <i>PLN</i>      | rs11157370     | 6   | 118,774,215 | 201,920            | Santos DG et al. "No evidence for an association between the -36A>C phospholamban gene polymorphism and a worse prognosis in heart failure." <i>BMC Cardiovasc Disord.</i> 2009 Jul 28;9:33. PMID 19638213                                           |
| <i>PLN</i>      | rs11157370     | 6   | 118,774,215 | 201,920            | Sugano Y et al. "Activated expression of cardiac adenylyl cyclase 6 reduces dilation and dysfunction of the pressure-overloaded heart." <i>Biochem Biophys Res Commun.</i> 2011 Feb 18;405(3):349-55. PMID 21195051                                  |
| <i>PLN</i>      | rs11157370     | 6   | 118,774,215 | 201,920            | Vittorini S et al. "SERCA2a, phospholamban, sarcolipin, and ryanodine receptors gene expression in children with congenital heart defects." <i>Mol Med.</i> 2007 Jan-Feb;13(1-2):105-11. PMID 17515962                                               |
| <i>PLN</i>      | rs11157370     | 6   | 118,774,215 | 201,920            | Wang HS et al. "SERCA2a Superinhibition by Human Phospholamban Triggers Electrical and Structural Remodelling in Mouse Hearts." <i>Physiol Genomics.</i> 2011 Jan 25; PMID 21266500                                                                  |
| <b>Locus 8</b>  |                |     |             |                    |                                                                                                                                                                                                                                                      |
| <i>BPI</i>      | rs6127471      | 20  | 36,277,452  | 88,514             | Goebel JR et al. "Heart failure: the hidden problem of pain." <i>J Pain Symptom Manage.</i> 2009 Nov;38(5):698-707. PMID 19733032                                                                                                                    |
| <b>Locus 9</b>  |                |     |             |                    |                                                                                                                                                                                                                                                      |
| <i>TTN</i>      | rs17362588     | 2   | 179,429,291 | 48,896             | Bullard B et al. "Association of the chaperone alphaB-crystallin with titin in heart muscle." <i>J Biol Chem.</i> 2004 Feb 27;279(9):7917-24. PMID 14676215                                                                                          |
| <i>TTN</i>      | rs17362588     | 2   | 179,429,291 | 48,896             | van Hees HW et al. "Heart failure decreases passive tension generation of rat diaphragm fibers." <i>Int J Cardiol.</i> 2010 Jun 11;141(3):275-83. PMID 19150150                                                                                      |
| <i>TTN</i>      | rs17362588     | 2   | 179,429,291 | 48,896             | Makarenko I et al. "Passive stiffness changes caused by upregulation of compliant titin isoforms in human dilated cardiomyopathy hearts." <i>Circ Res.</i> 2004 Oct 1;95(7):708-16. PMID 15345656                                                    |
| <i>TTN</i>      | rs17362588     | 2   | 179,429,291 | 48,896             | Lange S et al. "Subcellular targeting of metabolic enzymes to titin in heart muscle may be mediated by DRAL/FHL-2." <i>J Cell Sci.</i> 2002 Dec 15;115(Pt 24):4925-36. PMID 12432079                                                                 |
| <i>TTN</i>      | rs17362588     | 2   | 179,429,291 | 48,896             | Neagoe C et al. "Titin isoform switch in ischemic human heart disease." <i>Circulation.</i> 2002 Sep 10;106(11):1333-41. PMID 12221049                                                                                                               |
| <b>Locus 11</b> |                |     |             |                    |                                                                                                                                                                                                                                                      |
| <i>HCN4</i>     | rs4489968      | 15  | 71,452,559  | 3,901              | Aanhaanen WT et al. "Developmental origin, growth, and three-dimensional architecture of the atrioventricular conduction axis of the mouse heart." <i>Circ Res.</i> 2010 Sep 17;107(6):728-36. PMID 20671237                                         |
| <i>HCN4</i>     | rs4489968      | 15  | 71,452,559  | 3,901              | Alig J et al. "Control of heart rate by cAMP sensitivity of HCN channels." <i>Proc Natl Acad Sci U S A.</i> 2009 Jul 21;106(29):12189-94. PMID 19570998                                                                                              |
| <i>HCN4</i>     | rs4489968      | 15  | 71,452,559  | 3,901              | Baruscotti M et al. "Deep bradycardia and heart block caused by inducible cardiac-specific knockout of the pacemaker channel gene <i>Hcn4</i> ." <i>Proc Natl Acad Sci U S A.</i> 2011 Jan 25;108(4):1705-10. PMID 21220308                          |
| <i>HCN4</i>     | rs4489968      | 15  | 71,452,559  | 3,901              | Gao Z et al. "Catecholamine-Independent Heart Rate Increases Require CaMKII." <i>Circ Arrhythm Electrophysiol.</i> 2011 Mar 15; PMID 21406683                                                                                                        |
| <i>HCN4</i>     | rs4489968      | 15  | 71,452,559  | 3,901              | Liang H et al. "Electrophysiological basis of the first heart beats." <i>Cell Physiol Biochem.</i> 2010;25(6):561-70. PMID 20511701                                                                                                                  |
| <i>HCN4</i>     | rs4489968      | 15  | 71,452,559  | 3,901              | Luo X et al. "Down-regulation of miR-1/miR-133 contributes to re-expression of pacemaker channel genes <i>HCN2</i> and <i>HCN4</i> in hypertrophic heart." <i>J Biol Chem.</i> 2008 Jul 18;283(29):20045-52. PMID 18458081                           |
| <i>HCN4</i>     | rs4489968      | 15  | 71,452,559  | 3,901              | Schweizer PA et al. "cAMP sensitivity of HCN pacemaker channels determines basal heart rate but is not critical for autonomic rate control." <i>Circ Arrhythm Electrophysiol.</i> 2010 Oct 1;3(5):542-52. PMID 20693575                              |
| <i>HCN4</i>     | rs4489968      | 15  | 71,452,559  | 3,901              | Vicente-Steijn R et al. "The funny current channel <i>HCN4</i> delineates the developing cardiac conduction system in the chicken heart." <i>Heart Rhythm.</i> 2011 Mar 18; PMID 21421080                                                            |
| <i>HCN4</i>     | rs4489968      | 15  | 71,452,559  | 3,901              | Xia S et al. "Dynamic changes in <i>HCN2</i> , <i>HCN4</i> , <i>KCNE1</i> , and <i>KCNE2</i> expression in ventricular cells from acute myocardial infarction rat hearts." <i>Biochem Biophys Res Commun.</i> 2010 May 7;395(3):330-5. PMID 20381460 |
| <i>HCN4</i>     | rs4489968      | 15  | 71,452,559  | 3,901              | Zhang J et al. "Differentiation induction of cardiac c-kit positive cells from rat heart into sinus node-like cells by 5-azacytidine." <i>Tissue Cell.</i> 2011 Apr;43(2):67-74. PMID 21237473                                                       |
| <b>Locus 12</b> |                |     |             |                    |                                                                                                                                                                                                                                                      |
| <i>MFN1</i>     | rs7612445      | 3   | 180,655,673 | 61,971             | Chen L et al. "Mitochondrial OPA1, apoptosis, and heart failure." <i>Cardiovasc Res.</i> 2009 Oct 1;84(1):91-9. PMID 19493956                                                                                                                        |
| <i>MFN1</i>     | rs7612445      | 3   | 180,655,673 | 61,971             | Jazbutyte V et al. "Mitochondrial dynamics: molecular mechanisms and the role in the heart." <i>Minerva Cardioangiol.</i> 2010 Apr;58(2):231-9. PMID 20440252                                                                                        |
| <i>MFN1</i>     | rs7612445      | 3   | 180,655,673 | 61,971             | Ong SB et al. "Inhibiting mitochondrial fission protects the heart against ischemia/reperfusion injury." <i>Circulation.</i> 2010 May 11;121(18):2012-22. PMID 20421521                                                                              |
| <b>Locus 13</b> |                |     |             |                    |                                                                                                                                                                                                                                                      |
| <i>FLRT2</i>    | rs17796783     | 14  | 84,879,664  | 186,577            | Müller PS et al. "The fibronectin leucine-rich repeat transmembrane protein Flrt2 is required in the epicardium to promote heart morphogenesis." <i>Development.</i> 2011 Apr;138(7):1297-308. PMID 21350012                                         |
| <b>Locus 14</b> |                |     |             |                    |                                                                                                                                                                                                                                                      |
| <i>CHRM2</i>    | rs2350782      | 7   | 136,293,174 | 0                  | Colombo G et al. "Treatment with alpha-melanocyte stimulating hormone preserves calcium regulatory proteins in rat heart allografts." <i>Brain Behav Immun.</i> 2008 Aug;22(6):817-23. PMID 18178058                                                 |
| <i>CHRM2</i>    | rs2350782      | 7   | 136,293,174 | 0                  | Hautala AJ et al. "Heart rate recovery after maximal exercise is associated with acetylcholine receptor M2 ( <i>CHRM2</i> ) gene polymorphism." <i>Am J Physiol Heart Circ Physiol.</i> 2006 Jul;291(1):H459-66. PMID 16501017                       |
| <i>CHRM2</i>    | rs2350782      | 7   | 136,293,174 | 0                  | Hautala AJ et al. "Acetylcholine receptor M2 gene variants, heart rate recovery, and risk of cardiac death after an acute myocardial infarction." <i>Ann Med.</i> 2009;41(3):197-207. PMID 18979273                                                  |
| <i>CHRM2</i>    | rs2350782      | 7   | 136,293,174 | 0                  | Laramie JM et al. "Multiple genes influence BMI on chromosome 7q31-34: the NHLBI Family Heart Study." <i>Obesity (Silver Spring).</i> 2009 Dec;17(12):2182-9. PMID 19461589                                                                          |
| <i>CHRM2</i>    | rs2350782      | 7   | 136,293,174 | 0                  | Wang H et al. "Expression of multiple subtypes of muscarinic receptors and cellular distribution in the human heart." <i>Mol Pharmacol.</i> 2001 May;59(5):1029-36. PMID 11306684                                                                    |

Supplementary Table 23 - continued

| Gene            | Heart rate SNP | Chr | Position    | Distance SNP- gene | Pubmed hit with search term 'heart'                                                                                                                                                                                                                                                    |
|-----------------|----------------|-----|-------------|--------------------|----------------------------------------------------------------------------------------------------------------------------------------------------------------------------------------------------------------------------------------------------------------------------------------|
| <b>Locus 15</b> |                |     |             |                    |                                                                                                                                                                                                                                                                                        |
| <i>NKX2-5</i>   | rs6882776      | 5   | 172,596,769 | 1,848              | Dinesh SM et al. "Single-nucleotide polymorphisms of NKX2.5 found in congenital heart disease patients of Mysore, South India." <i>Genet Test Mol Biomarkers</i> . 2010 Dec;14(6):873-9. PMID 21091212                                                                                 |
| <i>NKX2-5</i>   | rs6882776      | 5   | 172,596,769 | 1,848              | Ding JD et al. "Preliminary exploration of transcription factor Nkx2.5 mutations and congenital heart diseases." <i>Zhonghua Yi Xue Za Zhi</i> . 2009 Apr 28;89(16):1114-6. PMID 19595143                                                                                              |
| <i>NKX2-5</i>   | rs6882776      | 5   | 172,596,769 | 1,848              | Draus JM Jr et al. "Investigation of somatic NKX2-5 mutations in congenital heart disease." <i>J Med Genet</i> . 2009 Feb;46(2):115-22. PMID 19181906                                                                                                                                  |
| <i>NKX2-5</i>   | rs6882776      | 5   | 172,596,769 | 1,848              | Gioli-Pereira L et al. "NKX2.5 mutations in patients with non-syndromic congenital heart disease." <i>Int J Cardiol</i> . 2010 Feb 4;138(3):261-5. PMID 19073351                                                                                                                       |
| <i>NKX2-5</i>   | rs6882776      | 5   | 172,596,769 | 1,848              | Hahurij ND et al. "Accessory atrioventricular myocardial pathways in mouse heart development; substrate for supraventricular tachycardias." <i>Pediatr Res</i> . 2011 Mar 10;. PMID 21399557                                                                                           |
| <i>NKX2-5</i>   | rs6882776      | 5   | 172,596,769 | 1,848              | Martin LK et al. "Canonical WNT Signaling Enhances Stem Cell Expression in the Developing Heart without a Corresponding Inhibition of Cardiogenic Differentiation." <i>Stem Cells Dev</i> . 2011 Feb 25;. PMID 21351874                                                                |
| <i>NKX2-5</i>   | rs6882776      | 5   | 172,596,769 | 1,848              | van de Meerakker JB et al. "A novel autosomal dominant condition consisting of congenital heart defects and low atrial rhythm maps to chromosome 9q." <i>Eur J Hum Genet</i> . 2011 Mar 9;. PMID 21386876                                                                              |
| <i>NKX2-5</i>   | rs6882776      | 5   | 172,596,769 | 1,848              | Mishra R et al. "Characterization and functionality of cardiac progenitor cells in congenital heart patients." <i>Circulation</i> . 2011 Feb 1;123(4):364-73. PMID 21242485                                                                                                            |
| <i>NKX2-5</i>   | rs6882776      | 5   | 172,596,769 | 1,848              | Mizuta E et al. "Different distribution of Cav3.2 and Cav3.1 transcripts encoding T-type Ca(2+) channels in the embryonic heart of mice." <i>Biomed Res</i> . 2010;31(5):301-5. PMID 21079360                                                                                          |
| <i>NKX2-5</i>   | rs6882776      | 5   | 172,596,769 | 1,848              | Peng T et al. "Mutations of the GATA4 and NKX2.5 genes in Chinese pediatric patients with non-familial congenital heart disease." <i>Genetica</i> . 2010 Dec;138(11-12):1231-40. PMID 21110066                                                                                         |
| <i>NKX2-5</i>   | rs6882776      | 5   | 172,596,769 | 1,848              | Reamon-Buettner SM et al. "NKX2-5: an update on this hypermutable homeodomain protein and its role in human congenital heart disease (CHD)." <i>Hum Mutat</i> . 2010 Nov;31(11):1185-94. PMID 20725931                                                                                 |
| <i>NKX2-5</i>   | rs6882776      | 5   | 172,596,769 | 1,848              | Salazar M et al. "Search of somatic GATA4 and NKX2.5 gene mutations in sporadic septal heart defects." <i>Eur J Med Genet</i> . 2011 Jan 27;. PMID 21276881                                                                                                                            |
| <i>NKX2-5</i>   | rs6882776      | 5   | 172,596,769 | 1,848              | Stallmeyer B et al. "Mutational spectrum in the cardiac transcription factor gene NKX2.5 (CSX) associated with congenital heart disease." <i>Clin Genet</i> . 2010 Dec;78(6):533-40. PMID 20456451                                                                                     |
| <i>NKX2-5</i>   | rs6882776      | 5   | 172,596,769 | 1,848              | Takeuchi JK et al. "Chromatin remodelling complex dosage modulates transcription factor function in heart development." <i>Nat Commun</i> . 2011 Feb;2:187. PMID 21304516                                                                                                              |
| <i>NKX2-5</i>   | rs6882776      | 5   | 172,596,769 | 1,848              | Vicente-Steijn R et al. "The funny current channel HCN4 delineates the developing cardiac conduction system in the chicken heart." <i>Heart Rhythm</i> . 2011 Mar 18;. PMID 21421080                                                                                                   |
| <i>NKX2-5</i>   | rs6882776      | 5   | 172,596,769 | 1,848              | Wang J et al. "Identifying novel mutations of NKX2-5 congenital heart disease patients of Chinese Minority Groups." <i>Int J Cardiol</i> . 2011 Apr 1;148(1):102-4. PMID 21262546                                                                                                      |
| <i>NKX2-5</i>   | rs6882776      | 5   | 172,596,769 | 1,848              | Zhang W et al. "Screening NKX2.5 mutation in a sample of 230 Han Chinese children with congenital heart diseases." <i>Genet Test Mol Biomarkers</i> . 2009 Apr;13(2):159-62. PMID 19371212                                                                                             |
| <i>NKX2-5</i>   | rs6882776      | 5   | 172,596,769 | 1,848              | Zhang WM et al. "GATA4 and NKX2.5 gene analysis in Chinese Uyghur patients with congenital heart disease." <i>Chin Med J (Engl)</i> . 2009 Feb 20;122(4):416-9. PMID 19302747                                                                                                          |
| <i>BNIP1</i>    | rs6882776      | 5   | 172,596,769 | 72,773             | Dostanic S et al. "Chronic beta-adrenoreceptor stimulation in vivo decreased Bcl-2 and increased Bax expression but did not activate apoptotic pathways in mouse heart." <i>Can J Physiol Pharmacol</i> . 2004 Mar;82(3):167-74. PMID 15052282                                         |
| <b>Locus 16</b> |                |     |             |                    |                                                                                                                                                                                                                                                                                        |
| <i>COL1A2</i>   | rs180242       | 7   | 93,387,532  | 474,277            | Peacock JD et al. "Temporal and spatial expression of collagens during murine atrioventricular heart valve development and maintenance." <i>Dev Dyn</i> . 2008 Oct;237(10):3051-8. PMID 18816857                                                                                       |
| <b>Locus 17</b> |                |     |             |                    |                                                                                                                                                                                                                                                                                        |
| <i>B3GNT7</i>   | rs13030174     | 2   | 231,979,528 | 5,409              | Jakovljevic DG et al. "Comparison of cardiac power output and exercise performance in patients with left ventricular assist devices, explanted (recovered) patients, and those with moderate to severe heart failure." <i>Am J Cardiol</i> . 2010 Jun 15;105(12):1780-5. PMID 20538130 |
| <b>Locus 18</b> |                |     |             |                    |                                                                                                                                                                                                                                                                                        |
| <i>PLD1</i>     | rs9647379      | 3   | 173,267,862 | 256,895            | Ahn M et al. "Increased expression of phospholipase D in the heart with experimental autoimmune myocarditis in Lewis rats." <i>Immunol Invest</i> . 2004 Feb;33(1):95-105. PMID 15015836                                                                                               |
| <i>PLD1</i>     | rs9647379      | 3   | 173,267,862 | 256,895            | Dent MR et al. "Expression of phospholipase D isozymes in scar and viable tissue in congestive heart failure due to myocardial infarction." <i>J Cell Mol Med</i> . 2004 Oct-Dec;8(4):526-36. PMID 15601581                                                                            |
| <i>PLD1</i>     | rs9647379      | 3   | 173,267,862 | 256,895            | Moon C et al. "Transient expression of phospholipase D1 during heart development in rats." <i>J Vet Med Sci</i> . 2008 Apr;70(4):411-3. PMID 18460839                                                                                                                                  |
| <i>GHSR</i>     | rs9647379      | 3   | 173,267,862 | 375,379            | Beiras-Fernandez A et al. "Altered myocardial expression of ghrelin and its receptor (GHSR-1a) in patients with severe heart failure." <i>Peptides</i> . 2010 Dec;31(12):2222-8. PMID 20804798                                                                                         |
| <b>Locus 19</b> |                |     |             |                    |                                                                                                                                                                                                                                                                                        |
| <i>CRY1</i>     | rs2067615      | 12  | 105,673,552 | 235,721            | Huang J et al. "Postnatal ontogenesis of clock genes in mouse suprachiasmatic nucleus and heart." <i>Lipids Health Dis</i> . 2010 Mar 5;9:22. PMID 20202222                                                                                                                            |
| <i>CRY1</i>     | rs2067615      | 12  | 105,673,552 | 235,721            | Leibetseder V et al. "Clock genes display rhythmic expression in human hearts." <i>Chronobiol Int</i> . 2009 May;26(4):621-36. PMID 19444745                                                                                                                                           |
| <b>Locus 21</b> |                |     |             |                    |                                                                                                                                                                                                                                                                                        |
| <i>TFPI</i>     | rs4140885      | 2   | 188,041,309 | 0                  | Opstad TB et al. "Gender differences of polymorphisms in the TF and TFPI genes, as related to phenotypes in patients with coronary heart disease and type-2 diabetes." <i>Thromb J</i> . 2010 May 5;8:7. PMID 20444258                                                                 |

**Supplementary Table 23 - continued**

| Gene          | Heart rate SNP | Chr | Position    | Distance SNP-<br>gene | Pubmed hit with search term 'heart'                                                                                                                                                                         |
|---------------|----------------|-----|-------------|-----------------------|-------------------------------------------------------------------------------------------------------------------------------------------------------------------------------------------------------------|
| <i>CALCRL</i> | rs4140885      | 2   | 188,041,309 | 20,043                | Jia YX et al. "Intermedin1-53 protects the heart against isoproterenol-induced ischemic injury in rats." <i>Eur J Pharmacol.</i> 2006 Nov 7;549(1-3):117-23. PMID 16987513                                  |
| <i>CALCRL</i> | rs4140885      | 2   | 188,041,309 | 20,043                | Øie E et al. "Adrenomedullin is increased in alveolar macrophages and released from the lungs into the circulation in severe heart failure." <i>Basic Res Cardiol.</i> 2010 Jan;105(1):89-98. PMID 19823891 |
| <i>CALCRL</i> | rs4140885      | 2   | 188,041,309 | 20,043                | Wang YF et al. "[Increased atria expression of receptor activity-modifying proteins in heart failure patients]." <i>Zhonghua Yi Xue Yi Chuan Xue Za Zhi.</i> 2004 Aug;21(4):351-4. PMID 15300632            |

**Supplementary Table 24 - Candidates genes for heart rate regulation within the 21 confirmed loci**

| Locus | chr | Gene     | Relevance | <i>Drosophila</i> | <i>Danio rerio</i> |
|-------|-----|----------|-----------|-------------------|--------------------|
| 1     | 14  | MYH6     | F, P, S   | -                 | -                  |
| 1     | 14  | MYH7     | S         | -                 | -                  |
| 2     | 6   | GJA1     | S         | -                 | -                  |
| 3     | 7   | ACHE     | S         | 1                 | -                  |
| 3     | 7   | EPHB4    | S         | 1                 | -                  |
| 3     | 7   | FIS1     | S         | -                 | -                  |
| 3     | 7   | MOSPD3   | B         | -                 | -                  |
| 3     | 7   | PCOLCE   | S         | 1                 | -                  |
| 3     | 7   | SERBP1   | S         | 1                 | -                  |
| 3     | 7   | TFR2     | B         | -                 | -                  |
| 3     | 7   | TIMP1    | S         | 1                 | -                  |
| 3     | 7   | TRIP6    | Q         | 1                 | -                  |
| 3     | 7   | UFSP1    | F         | 1                 | -                  |
| 4     | 1   | CD34     | S         | -                 | -                  |
| 4     | 1   | CD46     | S         | 1                 | -                  |
| 4     | 1   | CD55     | S         | 1                 | -                  |
| 4     | 1   | CR1      | S         | 1                 | -                  |
| 4     | 1   | PLXNA2   | B         | 1                 | -                  |
| 5     | 11  | BEST1    | S         | -                 | 1                  |
| 5     | 11  | TMEM258  | S         | -                 | -                  |
| 5     | 11  | FADS1    | S         | 1                 | -                  |
| 5     | 11  | FADS2    | Q         | -                 | 1                  |
| 5     | 11  | FADS3    | B         | 1                 | -                  |
| 5     | 11  | FTH1     | Q         | 1                 | -                  |
| 5     | 11  | RAB31L1  | Q         | -                 | -                  |
| 6     | 6   | CEP85L   | F, Q      | -                 | -                  |
| 6     | 6   | PLN      | P, S      | -                 | -                  |
| 8     | 20  | BPI      | S         | -                 | -                  |
| 8     | 20  | KIAA1755 | F         | -                 | -                  |
| 9     | 2   | CCDC141  | F         | -                 | -                  |
| 9     | 2   | TTN      | P, S      | 1                 | -                  |
| 11    | 15  | HCN4     | S         | -                 | -                  |
| 12    | 3   | MFN1     | S         | 1                 | 1                  |
| 13    | 14  | FLRT2    | S         | 1                 | -                  |
| 14    | 7   | CHRM2    | S         | 1                 | -                  |
| 15    | 5   | BNIP1    | Q         | -                 | -                  |
| 15    | 5   | NKX2-5   | S         | 1                 | -                  |
| 16    | 7   | COL1A2   | S         | -                 | 1                  |
| 16    | 7   | GNG11    | F, Q      | 1                 | -                  |
| 16    | 7   | TFPI2    | B         | -                 | 1                  |
| 17    | 2   | B3GNT7   | F, S      | -                 | -                  |
| 17    | 2   | HTR2B    | B         | 1                 | 1                  |
| 17    | 2   | NCL      | Q, P      | -                 | 1                  |
| 17    | 2   | SNORD20  | Q         | -                 | -                  |
| 18    | 3   | GHSR     | S         | 1                 | 1                  |
| 18    | 3   | PLD1     | S         | 1                 | 1                  |
| 19    | 12  | CRY1     | S         | 1                 | 1                  |
| 21    | 2   | CALCRL   | S         | 1                 | 1                  |
| 21    | 2   | TFPI     | F, S      | -                 | 1                  |

Gene, the candidate gene that is located within  $\pm 500$  kb of the GWAS association; Relevance, indicates if candidacy is based on linkage disequilibrium with a potentially functional variant ( $r^2 > 0.8$ ) (F), association with eQTL in blood (Q), results from proteomics experiments in mice showing that the gene is expressed in heart and is phosphorylated upon  $\beta 1$  adrenergic stimulation (P); results from our automated literature search using SNIPPER (S), and/or biological candidacy (B); *Drosophila*, indicates for which genes heart rate measurements are available in at least five *Drosophila melanogaster* pupae with the ortholog knocked out by RNAi line(s); *Danio rerio* shows for which genes heart measurements are available in embryos of the zebrafish *Danio rerio* that were injected with morpholino oligonucleotides targeting the ortholog.



Supplementary Table 25 - Orthologs and RNAi lines for positional candidate genes in *Drosophila melanogaster*

| Locus | Chr | Gene     | Drosophila ortholog |         | BLAST statistics |           |                         |             |         |               |         |             |         |                      | RNAi line information |         |           |              |
|-------|-----|----------|---------------------|---------|------------------|-----------|-------------------------|-------------|---------|---------------|---------|-------------|---------|----------------------|-----------------------|---------|-----------|--------------|
|       |     |          |                     |         | Gene name        | CG number | Bit score               | Raw score   | E-value | Identities    |         | Positives   |         | Gaps                 |                       | Line nr | viability | availability |
|       |     |          |                     |         |                  |           |                         |             |         | Abs           | rel (%) | Abs         | rel (%) | Abs                  | rel (%)               |         |           |              |
| 1     | 14  | MYH6     | Mhc                 | CG17927 | 1828             | 4734      | 0                       | 961 / 1,921 | 50.0    | 1,265 / 1,921 | 65.9    | 20 / 1,921  | 1.0     | 7164                 | LV                    | no      |           |              |
| 1     | 14  | MYH7     | Mhc                 | CG17927 | 1864             | 4828      | 0                       | 979 / 1,923 | 50.9    | 1,306 / 1,923 | 67.9    | 13 / 1,923  | 0.7     | 7164                 | LV                    | no      |           |              |
| 2     | 6   | GJA1     | -                   | -       | -                | -         | -                       | -           | -       | -             | -       | -           | -       | -                    | -                     | no      |           |              |
| 3     | 7   | ACHE     | Ace                 | CG17907 | 367              | 940       | 2.68x10 <sup>-101</sup> | 203 / 582   | 34.9    | 298 / 582     | 51.2    | 50 / 582    | 8.6     | 3968, 105432         | LV, V                 | yes     |           |              |
| 3     | 7   | EPH4     | Eph                 | CG15111 | 668              | 1722      | 0                       | 390 / 1,009 | 38.7    | 556 / 1,009   | 55.1    | 94 / 1,009  | 9.3     | 4771, 110448         | V, LV                 | yes     |           |              |
| 3     | 7   | FIS1     | Fis1                | CG17510 | 118              | 294       | 3.02x10 <sup>-27</sup>  | 61 / 122    | 50.0    | 84 / 122      | 68.9    | 3 / 122     | 2.5     | not available        | -                     | no      |           |              |
| 3     | 7   | MOSPD3   | -                   | -       | -                | -         | -                       | -           | -       | -             | -       | -           | -       | -                    | -                     | no      |           |              |
| 3     | 7   | PCOLCE   | tok                 | CG6863  | 158              | 397       | 1.92x10 <sup>-38</sup>  | 94 / 276    | 34.1    | 137 / 276     | 49.6    | 40 / 276    | 14.5    | 2656, 110432         | V, V                  | yes     |           |              |
| 3     | 7   | SERBP1   | Spn42Db             | CG9454  | 149              | 374       | 8.56x10 <sup>-36</sup>  | 112 / 371   | 30.2    | 166 / 371     | 44.7    | 17 / 371    | 4.6     | 24033, 104263        | V, LV                 | yes     |           |              |
| 3     | 7   | TFR2     | -                   | -       | -                | -         | -                       | -           | -       | -             | -       | -           | -       | -                    | -                     | no      |           |              |
| 3     | 7   | TIMP1    | Timp                | CG6281  | 56               | 134       | 1.73x10 <sup>-68</sup>  | 36 / 141    | 25.5    | 68 / 141      | 48.2    | 15 / 141    | 10.6    | 109427               | V                     | yes     |           |              |
| 3     | 7   | TRIP6    | Zyx                 | CG32018 | 235              | 597       | 1.32x10 <sup>-61</sup>  | 101 / 180   | 56.1    | 135 / 180     | 75.0    | 0 / 180     | 0.0     | 21610                | V                     | yes     |           |              |
| 3     | 7   | UFSP1    | CG16979             | CG16979 | 63               | 152       | 7.88x10 <sup>-11</sup>  | 40 / 126    | 31.7    | 55 / 126      | 43.7    | 3 / 126     | 2.4     | 105386               | V                     | yes     |           |              |
| 4     | 1   | CD34     | -                   | -       | -                | -         | -                       | -           | -       | -             | -       | -           | -       | -                    | -                     | no      |           |              |
| 4     | 1   | CD46     | fw                  | CG1500  | 91               | 225       | 1.41x10 <sup>-18</sup>  | 67 / 243    | 27.6    | 96 / 243      | 39.5    | 18 / 243    | 7.4     | 106656               | V                     | yes     |           |              |
| 4     | 1   | CD55     | fw                  | CG1500  | 89               | 218       | 9.82x10 <sup>-18</sup>  | 73 / 271    | 26.9    | 114 / 271     | 42.1    | 38 / 271    | 14.0    | 106656               | V                     | yes     |           |              |
| 4     | 1   | CR1      | fw                  | CG1500  | 200              | 508       | 1.57x10 <sup>-50</sup>  | 174 / 664   | 27.0    | 263 / 644     | 40.8    | 75 / 644    | 11.6    | 106656               | V                     | yes     |           |              |
| 4     | 1   | PLXNA2   | plexA               | CG11081 | 1342             | 3471      | 0                       | 784 / 1,923 | 40.8    | 1110 / 1,923  | 57.8    | 125 / 1,923 | 6.5     | 4740, 107004         | V, LV                 | yes     |           |              |
| 5     | 11  | BEST1    | Best1               | CG6264  | 393              | 1009      | 3.06x10 <sup>-109</sup> | 197 / 379   | 52.0    | 259 / 379     | 68.3    | 10 / 379    | 2.6     | 5963                 | NA                    | no      |           |              |
| 5     | 11  | TMEM258  | CG9669              | CG9669  | 76               | 184       | 8.88x10 <sup>-15</sup>  | 38 / 61     | 62.3    | 46 / 61       | 75.4    | 3 / 61      | 4.9     | not available        | -                     | no      |           |              |
| 5     | 11  | FADS1    | CG6870              | CG6870  | 66               | 159       | 7.64x10 <sup>-11</sup>  | 37 / 89     | 41.6    | 53 / 89       | 59.6    | 5 / 89      | 5.6     | 52570, 102803        | V, V                  | yes     |           |              |
| 5     | 11  | FADS2    | -                   | -       | -                | -         | -                       | -           | -       | -             | -       | -           | -       | -                    | -                     | no      |           |              |
| 5     | 11  | FADS3    | Cyt-b5-r            | CG13279 | 38               | 87        | 1.59x10 <sup>-62</sup>  | 82 / 385    | 21.3    | 138 / 385     | 35.8    | 61 / 385    | 15.8    | 42472, 100507        | V, V                  | yes     |           |              |
| 5     | 11  | FTH1     | Fer3HCH             | CG4349  | 146              | 367       | 1.62x10 <sup>-35</sup>  | 76 / 167    | 45.5    | 112 / 167     | 67.1    | 6 / 167     | 3.6     | 40505                | V                     | yes     |           |              |
| 5     | 11  | RAB31L1  | -                   | -       | -                | -         | -                       | -           | -       | -             | -       | -           | -       | -                    | -                     | no      |           |              |
| 6     | 6   | CEP85L   | -                   | -       | -                | -         | -                       | -           | -       | -             | -       | -           | -       | -                    | -                     | no      |           |              |
| 6     | 6   | PLN      | -                   | -       | -                | -         | -                       | -           | -       | -             | -       | -           | -       | -                    | -                     | no      |           |              |
| 8     | 20  | BPI      | -                   | -       | -                | -         | -                       | -           | -       | -             | -       | -           | -       | -                    | -                     | no      |           |              |
| 8     | 20  | KIAA1755 | trio                | CG18214 | 54               | 129       | 7.33x10 <sup>-67</sup>  | 53 / 228    | 23.2    | 95 / 228      | 41.7    | 15 / 228    | 6.6     | not available        | -                     | no      |           |              |
| 9     | 2   | CCDC141  | -                   | -       | -                | -         | -                       | -           | -       | -             | -       | -           | -       | -                    | -                     | no      |           |              |
| 9     | 2   | TTN      | sls                 | CG1915  | 123              | 306       | 2.18x10 <sup>-27</sup>  | 77 / 266    | 28.9    | 129 / 266     | 48.5    | 25 / 266    | 9.4     | 47298, 47301         | V, V                  | yes     |           |              |
| 11    | 15  | HCN4     | Ih                  | CG8585  | 653              | 1682      | 0                       | 305 / 518   | 58.9    | 385 / 518     | 74.3    | 6 / 518     | 1.2     | 110274               | LV                    | no      |           |              |
| 12    | 3   | MFN1     | Marf                | CG3869  | 624              | 1609      | 8.94x10 <sup>-179</sup> | 335 / 741   | 45.2    | 463 / 741     | 62.5    | 16 / 741    | 2.2     | 40478, 105261        | V, V                  | yes     |           |              |
| 13    | 14  | FLRT2    | sli                 | CG8355  | 97               | 240       | 4.20x10 <sup>-20</sup>  | 97 / 413    | 23.5    | 163 / 413     | 39.5    | 92 / 413    | 22.3    | 108853               | V                     | yes     |           |              |
| 14    | 7   | CHRM2    | mAcR-60C            | CG4356  | 254              | 647       | 1.93x10 <sup>-67</sup>  | 120 / 202   | 59.4    | 147 / 202     | 72.8    | 1 / 202     | 0.5     | 33123, 101407        | V, V                  | yes     |           |              |
| 15    | 5   | BNIP1    | CG2023              | CG2023  | 110              | 274       | 1.41x10 <sup>-24</sup>  | 69 / 219    | 31.5    | 117 / 219     | 53.4    | 11 / 219    | 5.0     | 100264               | LV                    | no      |           |              |
| 15    | 5   | NKX2-5   | scro                | CG17594 | 134              | 337       | 1.22x10 <sup>-31</sup>  | 60 / 92     | 65.2    | 72 / 92       | 78.3    | 0 / 92      | 0.0     | 33902                | V                     | yes     |           |              |
| 16    | 7   | COL1A2   | -                   | -       | -                | -         | -                       | -           | -       | -             | -       | -           | -       | -                    | -                     | no      |           |              |
| 16    | 7   | GNG11    | Ggamma1             | CG8261  | 50               | 119       | 3.11x10 <sup>-67</sup>  | 24 / 55     | 43.6    | 33 / 55       | 60.0    | 1 / 55      | 1.8     | 28844                | V                     | yes     |           |              |
| 16    | 7   | TFF2     | Ppn                 | CG33103 | 94               | 233       | 8.79x10 <sup>-20</sup>  | 57 / 171    | 33.3    | 79 / 171      | 46.2    | 3 / 171     | 1.8     | 16523, 108005        | LV, NV                | no      |           |              |
| 17    | 2   | B3GNT7   | -                   | -       | -                | -         | -                       | -           | -       | -             | -       | -           | -       | -                    | -                     | no      |           |              |
| 17    | 2   | HTR2B    | D2R                 | CG33517 | 178              | 450       | 1.38x10 <sup>-44</sup>  | 126 / 388   | 32.5    | 192 / 388     | 49.5    | 58 / 388    | 14.9    | 11470, 11471, 107058 | V, V, NV              | yes     |           |              |
| 17    | 2   | NCL      | pAbp                | CG5119  | 81               | 199       | 3.26x10 <sup>-15</sup>  | 90 / 345    | 26.1    | 166 / 345     | 48.1    | 44 / 345    | 12.8    | 22007                | LV                    | no      |           |              |
| 17    | 2   | SNORD20  | -                   | -       | -                | -         | -                       | -           | -       | -             | -       | -           | -       | -                    | -                     | no      |           |              |
| 18    | 3   | GHSR     | capaR               | CG14575 | 160              | 402       | 3.39x10 <sup>-39</sup>  | 109 / 325   | 33.5    | 167 / 325     | 51.4    | 27 / 325    | 8.3     | 105556               | V                     | yes     |           |              |
| 18    | 3   | PLD1     | Pld                 | CG12110 | 329              | 842       | 1.46x10 <sup>-89</sup>  | 157 / 354   | 44.4    | 224 / 354     | 63.3    | 17 / 354    | 4.8     | 38626, 106137        | V, V                  | yes     |           |              |
| 19    | 12  | CRY1     | phr6-4              | CG2488  | 527              | 1356      | 1.70x10 <sup>-149</sup> | 256 / 494   | 51.8    | 330 / 494     | 66.8    | 13 / 494    | 2.6     | 108994               | V                     | yes     |           |              |
| 21    | 2   | CALCRL   | Dh31-R1             | CG32843 | 218              | 553       | 1.53x10 <sup>-56</sup>  | 139 / 380   | 36.6    | 192 / 380     | 50.5    | 29 / 380    | 7.6     | 8777, 101995         | V, V                  | yes     |           |              |
| 21    | 2   | TFF1     | Ppn                 | CG33103 | 121              | 301       | 1.73x10 <sup>-27</sup>  | 73 / 214    | 34.1    | 101 / 214     | 47.2    | 36 / 214    | 16.8    | 16523, 108005        | LV, NV                | no      |           |              |

Gaps in the ortholog indicate that the ortholog is not present in the genome. The E-value is the probability of a random match of the same length as the query being found in a database of the same size. The identity is the number of amino acids that are identical between the ortholog and the human gene. The positives are the number of amino acids that are biologically informative. Identities, x / y means that x of the amino acids within the total stretch of y is congruent between the protein product of the drosophila ortholog and the human gene; Positives, amino acid substitutions that occur frequently and generally do not alter protein function receive a more positive score than amino acids that do not substitute frequently; Gaps, the number of gaps that need to be introduced to align the sequence versus the theoretical maximal number of gaps; Line information, the identification number(s) of the RNAi line(s) targeting the drosophila ortholog as described in Dietzl et al., 2007 and as publicly available at the Vienna Drosophila RNAi Center (VDRC, <http://stockcenter.vdrc.at/control/main>); Viability, indicates whether crossings of drosophila to induce expression of specific RNAi constructs resulted in: 1) more than five live pupae, i.e. viable offspring (V); 2) 0-4 live pupae, i.e. less viable offspring (LV); 3) no live pupae, i.e. no viable offspring (NV). Where multiple RNAi lines were available for an ortholog, viability is indicated for each line separately in the order in which RNAi lines are presented under 'Line information'. For *BEST1*, none of the ordered pupae were alive at arrival (NA). Where multiple independent RNAi lines are available for the same ortholog, results from the available lines were combined using an inverse variance weighted fixed effects meta-analysis if the RNAi lines combined resulted in data from at least five live offspring. Availability shows whether results were ultimately available for the ortholog or not.

For sls, the drosophila ortholog of *TTN*, the quality control data are provided for the first 1200 amino acids; data for the last part of the ortholog is comparable.

**Supplementary Table 26 - Meta-analyses of effects on heart rate of multiple independent RNAi lines targeting the same ortholog in *Drosophila melanogaster* pupae**

| Locus | Gene   | Line          | Heart rate at rest |     |                        |                | Heart rate post-tachypacing |      |                        |                | Heart rate post-tachypacing adjusted for heart rest at rest |      |                        |                | N  |
|-------|--------|---------------|--------------------|-----|------------------------|----------------|-----------------------------|------|------------------------|----------------|-------------------------------------------------------------|------|------------------------|----------------|----|
|       |        |               | beta               | SE  | p                      | I <sup>2</sup> | beta                        | SE   | p                      | I <sup>2</sup> | beta                                                        | SE   | p                      | I <sup>2</sup> |    |
| 3     | ACHE   | 3968          | -8.4               | 5.9 | 0.17                   |                | -3.1                        | 15.4 | 0.84                   |                | -1.4                                                        | 16.1 | 0.93                   |                | 3  |
|       |        | 105432        | -20.1              | 4.0 | 1.11x10 <sup>-05</sup> |                | -25.0                       | 8.3  | 4.62x10 <sup>-03</sup> |                | -19.4                                                       | 10.7 | 0.07                   |                | 11 |
|       |        | meta-analysis | -16.5              | 3.3 | 6.70x10 <sup>-07</sup> | 62.9           | -20.0                       | 7.3  | 0.01                   | 36.5           | -13.8                                                       | 8.9  | 0.12                   | 0.0            | 14 |
| 3     | EPHB4  | 4771          | -18.0              | 3.9 | 5.66x10 <sup>-05</sup> |                | -9.1                        | 9.7  | 0.35                   |                | -3.2                                                        | 12.3 | 0.79                   |                | 8  |
|       |        | 110448        | 3.9                | 6.0 | 0.52                   |                | -46.4                       | 14.9 | 3.89x10 <sup>-03</sup> |                | 47.2                                                        | 15.2 | 2.70x10 <sup>-03</sup> |                | 3  |
|       |        | meta-analysis | -11.4              | 3.3 | 5.41x10 <sup>-04</sup> | 89.2           | -20.3                       | 8.1  | 0.01                   | 77.2           | -20.7                                                       | 9.5  | 0.03                   | 80.3           | 11 |
| 3     | PCOLCE | 2656          | -18.4              | 3.3 | 1.80x10 <sup>-06</sup> |                | 12.6                        | 8.3  | 0.14                   |                | 16.0                                                        | 11.4 | 0.17                   |                | 10 |
|       |        | 110432        | -12.4              | 4.3 | 7.19x10 <sup>-03</sup> |                | 18.4                        | 10.8 | 0.10                   |                | 22.7                                                        | 12.1 | 0.07                   |                | 6  |
|       |        | meta-analysis | -16.2              | 2.6 | 4.89x10 <sup>-10</sup> | 18.4           | 14.8                        | 6.6  | 0.03                   | 0.0            | 19.1                                                        | 8.3  | 0.02                   | 0.0            | 16 |
| 3     | SERBP1 | 24033         | -2.4               | 4.3 | 0.58                   |                | 16.2                        | 10.7 | 0.14                   |                | 17.0                                                        | 10.8 | 0.12                   |                | 6  |
|       |        | 104263        | -14.9              | 5.5 | 0.01                   |                | 7.2                         | 12.9 | 0.58                   |                | 10.7                                                        | 14.5 | 0.46                   |                | 4  |
|       |        | meta-analysis | -7.2               | 3.4 | 0.03                   | 68.9           | 12.6                        | 8.2  | 0.13                   | 0.0            | 14.7                                                        | 8.7  | 0.09                   | 0.0            | 10 |
| 4     | PLXNA2 | 4740          | -0.7               | 5.6 | 0.90                   |                | 8.7                         | 13.1 | 0.51                   |                | 8.7                                                         | 13.3 | 0.52                   |                | 4  |
|       |        | 107004        | -22.0              | 4.0 | 2.72x10 <sup>-06</sup> |                | -19.4                       | 9.1  | 0.04                   |                | -18.8                                                       | 12.5 | 0.14                   |                | 9  |
|       |        | meta-analysis | -14.8              | 3.2 | 4.58x10 <sup>-06</sup> | 89.6           | -10.3                       | 7.5  | 0.17                   | 67.7           | -5.9                                                        | 9.1  | 0.51                   | 56.1           | 13 |
| 5     | FADS1  | 52570         | -12.3              | 4.0 | 3.95x10 <sup>-03</sup> |                | 27.9                        | 10.7 | 0.01                   |                | 30.3                                                        | 12.2 | 0.02                   |                | 7  |
|       |        | 102803        | -14.3              | 4.7 | 4.22x10 <sup>-03</sup> |                | -21.7                       | 12.1 | 0.08                   |                | -14.8                                                       | 13.6 | 0.28                   |                | 6  |
|       |        | meta-analysis | -13.2              | 3.0 | 1.43x10 <sup>-05</sup> | 0.0            | 6.2                         | 8.0  | 0.44                   | 89.4           | 10.2                                                        | 9.1  | 0.26                   | 83.6           | 13 |
| 5     | FADS3  | 42472         | -6.5               | 4.9 | 0.19                   |                | -8.6                        | 12.4 | 0.49                   |                | -5.9                                                        | 12.7 | 0.65                   |                | 5  |
|       |        | 105007        | -15.0              | 4.8 | 3.66x10 <sup>-03</sup> |                | -26.9                       | 12.2 | 0.03                   |                | -26.0                                                       | 14.1 | 0.07                   |                | 5  |
|       |        | meta-analysis | -10.8              | 3.4 | 1.51x10 <sup>-03</sup> | 34.7           | -17.9                       | 8.7  | 0.04                   | 9.8            | -14.9                                                       | 9.4  | 0.11                   | 11.2           | 10 |
| 9     | TTN    | 47298         | -13.4              | 4.2 | 2.69x10 <sup>-03</sup> |                | -13.4                       | 9.3  | 0.16                   |                | -15.7                                                       | 10.5 | 0.14                   |                | 12 |
|       |        | 47301         | -34.2              | 4.7 | 1.80x10 <sup>-08</sup> |                | -35.9                       | 10.4 | 1.40x10 <sup>-03</sup> |                | -22.6                                                       | 16.2 | 0.17                   |                | 8  |
|       |        | meta-analysis | -22.5              | 3.1 | 7.72x10 <sup>-13</sup> | 90.7           | -23.4                       | 6.9  | 7.29x10 <sup>-04</sup> | 61.8           | -17.7                                                       | 8.8  | 0.04                   | 0.0            | 20 |
| 12    | MFN1   | 40478         | -22.6              | 4.5 | 1.30x10 <sup>-05</sup> |                | -71.4                       | 9.7  | 1.31x10 <sup>-08</sup> |                | -68.1                                                       | 12.9 | 1.44x10 <sup>-07</sup> |                | 7  |
|       |        | 105261        | -27.7              | 5.3 | 5.70x10 <sup>-06</sup> |                | -16.1                       | 9.2  | 0.09                   |                | -5.5                                                        | 11.9 | 0.64                   |                | 11 |
|       |        | meta-analysis | -24.7              | 3.4 | 3.87x10 <sup>-13</sup> | 0.0            | -42.3                       | 6.7  | 2.38x10 <sup>-10</sup> | 94.2           | -34.2                                                       | 8.8  | 9.53x10 <sup>-05</sup> | 92.1           | 18 |
| 14    | CHRM2  | 33123         | -19.9              | 4.0 | 1.42x10 <sup>-05</sup> |                | 1.9                         | 10.5 | 0.86                   |                | 13.0                                                        | 13.6 | 0.35                   |                | 8  |
|       |        | 101407        | -24.6              | 5.1 | 2.87x10 <sup>-05</sup> |                | -30.0                       | 11.9 | 0.02                   |                | -26.5                                                       | 15.8 | 0.10                   |                | 5  |
|       |        | meta-analysis | -21.7              | 3.1 | 3.86x10 <sup>-12</sup> | 0.0            | -12.1                       | 7.9  | 0.13                   | 75.1           | -3.8                                                        | 10.3 | 0.71                   | 72.1           | 13 |
| 17    | HTR2B  | 11470         | 22.0               | 5.7 | 5.20x10 <sup>-04</sup> |                | 25.8                        | 14.4 | 0.08                   |                | 12.8                                                        | 17.2 | 0.46                   |                | 4  |
|       |        | 11471         | -7.3               | 4.1 | 0.08                   |                | -0.7                        | 8.6  | 0.94                   |                | 0.4                                                         | 9.0  | 0.97                   |                | 10 |
|       |        | meta-analysis | 2.6                | 3.3 | 0.43                   | 94.3           | 6.2                         | 7.4  | 0.40                   | 59.8           | 3.1                                                         | 8.0  | 0.70                   | 0.0            | 14 |
| 18    | PLD1   | 38626         | -8.9               | 3.3 | 9.75x10 <sup>-03</sup> |                | 2.3                         | 7.5  | 0.76                   |                | 7.8                                                         | 8.0  | 0.33                   |                | 15 |
|       |        | 106137        | -15.1              | 3.6 | 1.91x10 <sup>-04</sup> |                | -4.7                        | 9.0  | 0.61                   |                | -1.0                                                        | 11.0 | 0.93                   |                | 9  |
|       |        | meta-analysis | -11.7              | 2.4 | 1.69x10 <sup>-06</sup> | 35.8           | -0.6                        | 5.8  | 0.92                   | 0.0            | 4.8                                                         | 6.4  | 0.46                   | 0.0            | 24 |
| 21    | CALCRL | 8777          | -13.3              | 4.3 | 4.23x10 <sup>-03</sup> |                | 11.6                        | 10.0 | 0.26                   |                | 16.3                                                        | 11.3 | 0.15                   |                | 7  |
|       |        | 101995        | 9.0                | 4.9 | 0.08                   |                | -0.9                        | 12.9 | 0.95                   |                | 0.1                                                         | 13.8 | 0.99                   |                | 5  |
|       |        | meta-analysis | -3.6               | 3.3 | 0.27                   | 91.3           | 6.9                         | 7.9  | 0.38                   | 0.0            | 9.8                                                         | 8.8  | 0.27                   | 0.0            | 12 |
|       | STWL   | 41009         | -3.5               | 5.2 | 0.50                   |                | 12.4                        | 13.7 | 0.37                   |                | 13.2                                                        | 13.9 | 0.35                   |                | 4  |
|       |        | 102848        | 2.4                | 4.7 | 0.61                   |                | 13.0                        | 11.3 | 0.26                   |                | 12.1                                                        | 11.4 | 0.29                   |                | 6  |
|       |        | meta-analysis | -0.3               | 3.5 | 0.94                   | 0.0            | 12.7                        | 8.7  | 0.14                   | 0.0            | 12.6                                                        | 8.8  | 0.16                   | 0.0            | 10 |

Locus, the heart rate locus identified by GWAS; Gene, the candidate gene located within ± 500 kb of the GWAS association for which an obvious ortholog was targeted by two independent RNAi lines in *Drosophila melanogaster*. Line, the identification number of the RNAi line targeting the drosophila ortholog as ordered from the Vienna Drosophila RNAi Center (VDRC, <http://stockcenter.vdrc.at/control/main>); beta and SE, shows the heart rate of the pupae treated with the specified RNAi line as compared with the heart rate of 6000V control pupae (N=30) in beats/min (bpm). Where specified, beta and SE result from a fixed effects meta-analysis of results from individual RNAi lines using the inverse variance method. We measured heart rate at rest and after 20 min of tachypacing, which represents a physical stress to the heart. Heart rate was 113.4 ± 10.1 bpm at rest (mean ± SD) and 74.5 ± 25.3 bpm post-tachypacing in controls. I<sup>2</sup>, represents the proportion of the variance between individual RNAi lines that can be attributed to heterogeneity for each ortholog; N shows the number of pupae that were available for analysis in each line, as well as after meta-analysis of both lines. 'STONEWALL' is a randomly selected gene with no anticipated effect on heart rate that is considered an extra control group. Data are sorted by locus and subsequently by beta for heart rate at rest.

**Supplementary Table 27 - Orthologs and morpholino oligonucleotides for positional candidate genes in *Danio rerio***

| Locus | Chr | Gene            | Ortholog  |           | BLAST statistics |                         |            |         |             |         |           | Morpholino and primer sequences |                           |                       |                                |  |
|-------|-----|-----------------|-----------|-----------|------------------|-------------------------|------------|---------|-------------|---------|-----------|---------------------------------|---------------------------|-----------------------|--------------------------------|--|
|       |     |                 | Gene name | Bit score | Raw score        | E-value                 | Identities |         | Positives   |         | Gaps      |                                 | MO sequence               | 5' qPCR primer        | 3' qPCR primer                 |  |
|       |     |                 |           |           |                  |                         | Abs        | rel (%) | Abs         | rel (%) | Abs       | rel (%)                         |                           |                       |                                |  |
| 4     | 1   | <i>CD34</i>     | -         |           |                  |                         |            |         |             |         |           |                                 |                           |                       |                                |  |
| 4     | 1   | <i>CD46</i>     | -         |           |                  |                         |            |         |             |         |           |                                 |                           |                       |                                |  |
| 4     | 1   | <i>CD55</i>     | -         |           |                  |                         |            |         |             |         |           |                                 |                           |                       |                                |  |
| 4     | 1   | <i>CR1</i>      | -         |           |                  |                         |            |         |             |         |           |                                 |                           |                       |                                |  |
| 4     | 1   | <i>PLXNA2</i>   | -         |           |                  |                         |            |         |             |         |           |                                 |                           |                       |                                |  |
| 5     | 11  | <i>BEST1</i>    | best1     | 1553      | 602              | 0                       | 295 / 480  | 61%     | 359 / 480   | 75%     | 12 / 480  | 3%                              | CTATGATGCCTTTACCTGTATGTGA | CTTCTGCGATGGAAAGGAAGC | cca gtc cga atg aca cag g      |  |
| 5     | 11  | <i>TMEM258</i>  | *         |           |                  |                         |            |         |             |         |           |                                 |                           |                       |                                |  |
| 5     | 11  | <i>FADS1</i>    | -         |           |                  |                         |            |         |             |         |           |                                 |                           |                       |                                |  |
| 5     | 11  | <i>FADS2</i>    | fads2     | 1395      | 541              | 0                       | 254 / 375  | 68%     | 301 / 375   | 80%     | 0 / 375   | 0%                              | TGCAGGTTTTTTTACCGTGGCGTCT | GTGGGTGGTGGTGGAGAGG   | gct ctc tta gca gcg gct tca gg |  |
| 5     | 11  | <i>FADS3</i>    | -         |           |                  |                         |            |         |             |         |           |                                 |                           |                       |                                |  |
| 5     | 11  | <i>FTH1</i>     | *         |           |                  |                         |            |         |             |         |           |                                 |                           |                       |                                |  |
| 5     | 11  | <i>RAB31L1</i>  | *         |           |                  |                         |            |         |             |         |           |                                 |                           |                       |                                |  |
| 8     | 20  | <i>BPI</i>      | -         |           |                  |                         |            |         |             |         |           |                                 |                           |                       |                                |  |
| 8     | 20  | <i>KIAA1755</i> | -         |           |                  |                         |            |         |             |         |           |                                 |                           |                       |                                |  |
| 12    | 3   | <i>MFN1</i>     | mfn1      | 2716      | 1050             | 0                       | 508 / 735  | 69%     | 609 / 735   | 83%     | 11 / 735  | 1%                              | GAAACCCCAACTACGCACCTCTT   | CCCTGGAGGAGCGAGAGT    | gca ttt gag gcg acg ggt gg     |  |
| 13    | 14  | <i>FLRT2</i>    | -         |           |                  |                         |            |         |             |         |           |                                 |                           |                       |                                |  |
| 16    | 7   | <i>COL1A2</i>   | col1a2    | 3237      | 1251             | 0                       | 966 / 1367 | 71%     | 1068 / 1367 | 78%     | 16 / 1367 | 1%                              | GCATATTTCAAACCTTACATTGACA | GCTCAGCTTTGTGGATACCCG | ccg ggt ttt cca tca ggt ccc    |  |
| 16    | 7   | <i>GNG11</i>    | -         |           |                  |                         |            |         |             |         |           |                                 |                           |                       |                                |  |
| 16    | 7   | <i>TFPI2</i>    | tfpi2     | 435       | 172              | 3.00x10 <sup>-52</sup>  | 85 / 204   | 42%     | 122 / 204   | 60%     | 9 / 204   | 4%                              | GCTCAATGTATCTTTACTTTAGGT  | GGCGTGTGATTACTCGGAGC  | cca cag ccg ctg tag ctg        |  |
| 17    | 2   | <i>B3GNT7</i>   | **        |           |                  |                         |            |         |             |         |           |                                 |                           |                       |                                |  |
| 17    | 2   | <i>HTR2B</i>    | htr2b     | 1425      | 553              | 0                       | 272 / 436  | 62%     | 347 / 436   | 80%     | 16 / 436  | 4%                              | CCTGTACGTAACTTACTGTAAAGC  | CCTGATGTCTCTGGCTG     | cac aag tgc atg atg gac gc     |  |
| 17    | 2   | <i>NCL</i>      | ncl       | 776       | 303              | 2.00x10 <sup>-96</sup>  | 157 / 260  | 60%     | 206 / 260   | 79%     | 12 / 260  | 5%                              | TGACGGTAATATCTTACCTTAGCGA | ATGGTAAAGCTCGCTAAG    | ggc agc agc ttt tcc gtt ttc    |  |
| 17    | 2   | <i>SNORD20</i>  | -         |           |                  |                         |            |         |             |         |           |                                 |                           |                       |                                |  |
| 18    | 3   | <i>GHSR</i>     | ghsrb     | 1261      | 490              | 9.00x10 <sup>-173</sup> | 241 / 343  | 70%     | 285 / 343   | 83%     | 3 / 343   | 1%                              | AGTAAAATCATCGCGCTCACCAAGC | CCCCGTCTGTGTTTGACGG   | caa gat acc gac cca c          |  |
| 18    | 3   | <i>PLD1</i>     | pld1a     | 3819      | 1475             | 0                       | 724 / 1076 | 67%     | 838 / 1076  | 78%     | 76 / 1076 | 7%                              | TGTTCTGCATTCTTTGACCTGTGC  | CCACACAGAGAGAAGG      | ctg gct cac atc aat aaa ctc c  |  |
| 19    | 12  | <i>CRY1</i>     | cry1b     | 2536      | 981              | 0                       | 475 / 614  | 77%     | 525 / 614   | 86%     | 44 / 614  | 7%                              | CGTCAAAAAGCAAACCTCACCTCCA | CCCTTCATTGCGGGACTC    | gga aag acg tct gta ggt tg     |  |
| 21    | 2   | <i>CALCRL</i>   | calcrla   | 1828      | 708              | 0                       | 331 / 449  | 74%     | 388 / 449   | 86%     | 6 / 449   | 1%                              | GTGGCAAATAATCTTACCTCAGT   | GACAGCGAGCTGCTGGAGC   | ctc ttg tgt ctt gac tgt tgt cc |  |
| 21    | 2   | <i>TFPI</i>     | tfpia     | 396       | 157              | 4.00x10 <sup>-45</sup>  | 85 / 274   | 31%     | 143 / 274   | 52%     | 46 / 274  | 17%                             | ATCTGCTGAAGGTGGAAACAAGCCA | CCGCTGTATTAAGTCAGAGG  | gga ttg aac acg tat ctc ctc    |  |

Genes in loci 1, 2, 3, 6, 9, 11, 14 and 15 (not shown) were not considered for *Danio rerio* (zebrafish) experiments based on abundant evidence indicating a role in heart rate regulation for *MYH6* and *MYH7* (locus 1), *GJA1* (locus 2), *ACHE* (locus 3), *PLN* (locus 6), *TTN* (locus 9), *HCN4* (locus 11), *CHRM2* (locus 14), and *NKX2-5* (locus 15). Within each of the remaining loci, a maximum of two promising candidate genes with available orthologs were selected for zebrafish experiments in first instance. This resulted in exclusion of *C11orf10*, *FTH1*, and *RAB31L1* in locus 5 (marked '\*'), and *B3GNT7* in locus 17 (marked '\*\*'). For the remaining candidate genes, gene name, BLAST statistics and primer information are provided for the zebrafish ortholog of the candidate gene that resulted in the highest Bit score in the BLAST search. A '-' indicates that no obvious ortholog was available for the candidate gene.

Gene, candidate gene for heart rate; Bit score, a measure of the similarity between the queried sequence and the observed sequence that takes into account the alignment of similar or identical residues, as well as any gaps introduced to align the sequences. Bit scores are normalized so that scores from different alignments can be compared and are calculated as: Bit score = (lambda \* Raw score - ln(K)) / ln(2), where lambda and K are constants provided by the BLAST search. A higher Bit score implies a better fit; Raw score, the total of all matches, mismatches and gap penalties; E-value, describes the number of alignments one would expect to find by chance that have the same Bit score as the alignment under consideration when searching a database of the current size. The E-value decreases exponentially as the Bit score increases and is calculated as: E-value = (query length) \* (length of the database) \* (2<sup>Bit score</sup>). An E-value <0.05 is typically considered biologically informative; Identities, x / y means that x of the amino acids within the total stretch of y is congruent between the protein product of the zebrafish ortholog and the human gene; Positives, amino acid substitutions that occur frequently and generally do not alter protein function receive a more positive score than amino acids that do not substitute frequently; Gaps, the number of gaps that need to be introduced to align the sequence versus the theoretical maximal number of gaps; MO sequence, the sequence of the morpholino oligonucleotide targeting the ortholog of the candidate gene; 5' qPCR and 3' qPCR, sequences of the primers used.

**Supplementary Table 28 - Effects on heart rate and arrhythmia in *Drosophila melanogaster* pupae with orthologs of positional candidate genes for heart rate targeted by RNAi**

| Locus | Gene                          | Heart rate at rest |     |                        | Heart rate post-tachypacing |      |                        | Heart rate post-tachypacing adjusted for heart rest at rest |      |                        | Arrhythmic at rest |                |                        | Arrhythmic post-tachypacing |                |                        |
|-------|-------------------------------|--------------------|-----|------------------------|-----------------------------|------|------------------------|-------------------------------------------------------------|------|------------------------|--------------------|----------------|------------------------|-----------------------------|----------------|------------------------|
|       |                               | beta               | SE  | p                      | beta                        | SE   | p                      | beta                                                        | SE   | p                      | N <sub>NA</sub>    | N <sub>A</sub> | p                      | N <sub>NA</sub>             | N <sub>A</sub> | p                      |
| 3     | <i>TRIP6</i>                  | -22.6              | 4.5 | 1.60x10 <sup>-05</sup> | -11.2                       | 10.3 | 0.28                   | -0.8                                                        | 13.4 | 0.95                   | 6                  | 1              | 0.19                   | 2                           | 5              | 4.90x10 <sup>-03</sup> |
| 3     | <i>ACHE</i> <sup>M</sup>      | -16.5              | 3.3 | 6.70x10 <sup>-07</sup> | -20.0                       | 7.3  | 0.01                   | -13.8                                                       | 8.9  | 0.12                   | 13                 | 1              | 0.32                   | 4                           | 10             | 2.51x10 <sup>-04</sup> |
| 3     | <i>PCOLCE</i> <sup>M</sup>    | -16.2              | 2.6 | 4.89x10 <sup>-10</sup> | 14.8                        | 6.6  | 0.03                   | 19.1                                                        | 8.3  | 0.02                   | 15                 | 1              | 0.35                   | 3                           | 13             | 9.05x10 <sup>-06</sup> |
| 3     | <i>UFSP1</i>                  | -14.2              | 3.7 | 5.05x10 <sup>-04</sup> | 7.4                         | 9.1  | 0.42                   | 13.5                                                        | 10.7 | 0.21                   | 7                  | 2              | 0.05                   | 4                           | 5              | 0.02                   |
| 3     | <i>EPHB4</i> <sup>M</sup>     | -11.4              | 3.3 | 5.41x10 <sup>-04</sup> | -20.3                       | 8.1  | 0.01                   | -20.7                                                       | 9.5  | 0.03                   | 11                 | 0              | -                      | 5                           | 6              | 0.01                   |
| 3     | <i>SERBP1</i> <sup>M</sup>    | -7.2               | 3.4 | 0.03                   | 12.6                        | 8.2  | 0.13                   | 14.7                                                        | 8.7  | 0.09                   | 10                 | 0              | -                      | 10                          | 0              | 0.56                   |
| 3     | <i>TIMP1</i>                  | -2.4               | 4.7 | 0.61                   | 0.8                         | 11.8 | 0.94                   | 1.5                                                         | 11.9 | 0.90                   | 5                  | 0              | -                      | 5                           | 0              | 1.00                   |
| 4     | <i>PLXNA2</i> <sup>M</sup>    | -14.8              | 3.2 | 4.58x10 <sup>-06</sup> | -10.3                       | 7.5  | 0.17                   | -5.9                                                        | 9.1  | 0.51                   | 12                 | 1              | 0.30                   | 5                           | 8              | 2.50x10 <sup>-03</sup> |
| 4     | <i>CD55 / CD46 / CR1</i>      | -10.2              | 4.2 | 0.02                   | -12.1                       | 9.6  | 0.21                   | -7.8                                                        | 10.3 | 0.45                   | 9                  | 0              | -                      | 9                           | 0              | 0.56                   |
| 5     | <i>FADS1</i> <sup>M</sup>     | -13.2              | 3.0 | 1.43x10 <sup>-05</sup> | 6.2                         | 8.0  | 0.44                   | 10.2                                                        | 9.1  | 0.26                   | 11                 | 2              | 0.09                   | 11                          | 2              | 1.00                   |
| 5     | <i>FADS3</i> <sup>M</sup>     | -10.8              | 3.4 | 1.51x10 <sup>-03</sup> | -17.9                       | 8.7  | 0.04                   | -14.9                                                       | 9.4  | 0.11                   | 9                  | 1              | 0.25                   | 1                           | 9              | 2.31x10 <sup>-05</sup> |
| 5     | <i>FTH1</i>                   | -6.1               | 4.4 | 0.17                   | -11.4                       | 12.4 | 0.37                   | -10.8                                                       | 13.0 | 0.41                   | 6                  | 0              | -                      | 6                           | 0              | 1.00                   |
| 9     | <i>TTN</i> <sup>M</sup>       | -22.5              | 3.1 | 7.72x10 <sup>-13</sup> | -23.4                       | 6.9  | 7.29x10 <sup>-04</sup> | -17.7                                                       | 8.8  | 0.04                   | 20                 | 0              | -                      | 16                          | 4              | 0.70                   |
| 12    | <i>MFN1</i> <sup>M</sup>      | -24.7              | 3.4 | 3.87x10 <sup>-13</sup> | -42.3                       | 6.7  | 2.38x10 <sup>-10</sup> | -34.2                                                       | 8.8  | 9.53x10 <sup>-05</sup> | 11                 | 7              | 4.32x10 <sup>-04</sup> | 3                           | 15             | 1.99x10 <sup>-06</sup> |
| 13    | <i>FLRT2</i>                  | -9.9               | 5.2 | 0.07                   | 3.7                         | 11.2 | 0.74                   | 10.5                                                        | 11.3 | 0.36                   | 7                  | 0              | -                      | 7                           | 0              | 0.57                   |
| 14    | <i>CHRM2</i> <sup>M</sup>     | -21.7              | 3.1 | 3.86x10 <sup>-12</sup> | -12.1                       | 7.9  | 0.13                   | -3.8                                                        | 10.3 | 0.71                   | 11                 | 2              | 0.09                   | 5                           | 8              | 2.50x10 <sup>-03</sup> |
| 15    | <i>NKX2-5</i>                 | 5.7                | 4.4 | 0.21                   | 4.0                         | 10.7 | 0.71                   | 2.0                                                         | 11.0 | 0.85                   | 6                  | 0              | -                      | 6                           | 0              | 1.00                   |
| 16    | <i>GNG11</i>                  | -18.0              | 4.9 | 8.61x10 <sup>-04</sup> | -5.9                        | 13.1 | 0.66                   | 4.1                                                         | 15.5 | 0.79                   | 5                  | 0              | -                      | 1                           | 4              | 0.01                   |
| 17    | <i>HTR2B</i> <sup>M</sup>     | 2.6                | 3.3 | 0.43                   | 6.2                         | 7.4  | 0.40                   | 3.1                                                         | 8.0  | 0.70                   | 14                 | 0              | -                      | 14                          | 0              | 0.29                   |
| 18    | <i>GHSR</i>                   | -22.3              | 3.7 | 5.30x10 <sup>-07</sup> | -17.6                       | 8.7  | 0.05                   | -7.6                                                        | 12.0 | 0.53                   | 10                 | 1              | 0.27                   | 7                           | 4              | 0.18                   |
| 18    | <i>PLD1</i> <sup>M</sup>      | -11.7              | 2.4 | 1.69x10 <sup>-06</sup> | -0.6                        | 5.8  | 0.92                   | 4.8                                                         | 6.4  | 0.46                   | 23                 | 1              | 0.44                   | 12                          | 12             | 6.10x10 <sup>-03</sup> |
| 19    | <i>CRY1</i>                   | -17.6              | 4.7 | 7.54x10 <sup>-04</sup> | -6.9                        | 11.8 | 0.56                   | -0.9                                                        | 14.2 | 0.95                   | 5                  | 0              | -                      | 1                           | 4              | 0.01                   |
| 21    | <i>CALCRL</i> <sup>M</sup>    | -3.6               | 3.3 | 0.27                   | 6.9                         | 7.9  | 0.38                   | 9.8                                                         | 8.8  | 0.27                   | 12                 | 0              | -                      | 12                          | 0              | 0.31                   |
|       | <i>STONEWALL</i> <sup>M</sup> | -0.3               | 3.5 | 0.94                   | 12.7                        | 8.7  | 0.14                   | 12.6                                                        | 8.8  | 0.16                   | 10                 | 0              | -                      | 10                          | 0              | 0.56                   |

Heart rate was 113.4 ± 10.1 bpm at rest (mean ± SD) and 74.5 ± 25.3 bpm post-tachypacing in 6000V control pupae (N=30). None of the control pupae shod arrhythmia at rest; four control pupae show arrhythmia post-tachypacing. '*STONEWALL*' is a randomly selected gene with no anticipated effect on heart rate that is considered an extra control group. Data are sorted by locus and subsequently by beta for heart rate at rest.

Locus, the heart rate locus identified by GWAS; Gene, the candidate gene located within ± 500 kb of the GWAS association for which an ortholog is targeted by RNAi in *Drosophila melanogaster*. The suffix M indicates that data from two RNAi lines are available for the ortholog. For these orthologs summary statistics for heart rate are from a fixed

**Supplementary Table 29 – Effects on heart rate and related traits in *Danio rerio* embryos with orthologs of positional candidate genes for heart rate targeted by morpholino oligonucleotides**

| Locus | Gene          | Expression (%) |     | Heart rate at rest |                  |                        | Fractional shortening |                    |                  |                        | Visible phenotype |                                  |                                |
|-------|---------------|----------------|-----|--------------------|------------------|------------------------|-----------------------|--------------------|------------------|------------------------|-------------------|----------------------------------|--------------------------------|
|       |               | mean           | SD  | beta <sub>HR</sub> | SE <sub>HR</sub> | P <sub>HR</sub>        | N <sub>HR</sub>       | beta <sub>FS</sub> | SE <sub>FS</sub> | P <sub>FS</sub>        | N <sub>FS</sub>   | Phenotype                        | Penetrance<br>% N <sub>p</sub> |
| 5     | <i>BEST1</i>  | 40.5           | 8.5 | -26.0              | 3.2              | 8.71x10 <sup>-16</sup> | 23 / 21               | 0.09               | 0.03             | 0.02                   | 6 / 7             | Edema                            | 35 19 / 55                     |
| 5     | <i>FADS2</i>  | 77.1           | 1.0 | -13.6              | 2.5              | 3.49x10 <sup>-08</sup> | 26 / 26               | -0.01              | 0.02             | 0.77                   | 5 / 3             | Blood pooling                    | 78 42 / 54                     |
| 12    | <i>MFN1</i>   | 57.3           | 0.6 | -9.3               | 2.0              | 3.50x10 <sup>-06</sup> | 25 / 28               | -0.09              | 0.04             | 0.04                   | 7 / 6             | Edema                            | 73 11 / 15                     |
| 16    | <i>COL1A2</i> | 1.6            | 0.0 | -3.7               | 2.1              | 0.07                   | 29 / 27               | -0.16              | 0.04             | 1.80x10 <sup>-03</sup> | 5 / 8             | -                                | - -                            |
| 16    | <i>TFPI2</i>  | 25.6           | 1.5 | 1.8                | 2.3              | 0.43                   | 23 / 23               | 0.06               | 0.03             | 0.03                   | 6 / 7             | Edema                            | 64 34 / 53                     |
| 17    | <i>HTR2B</i>  | 33.2           | 4.1 | -9.6               | 2.5              | 1.55x10 <sup>-04</sup> | 25 / 28               | -0.05              | 0.03             | 0.16                   | 7 / 6             | Unlooped heart                   | 33 7 / 21                      |
| 17    | <i>NCL</i>    | 57.4           | 0.9 | -9.1               | 1.9              | 1.19x10 <sup>-06</sup> | 35 / 37               | -0.01              | 0.02             | 0.55                   | 7 / 6             | Unlooped heart                   | 31 13 / 42                     |
| 18    | <i>PLD1</i>   | 62.3           | 0.8 | -15.6              | 3.0              | 1.91x10 <sup>-07</sup> | 28 / 29               | 0.03               | 0.03             | 0.39                   | 3 / 3             | Unlooped heart                   | 51 27 / 53                     |
| 18    | <i>GHSR</i>   | 70.2           | 5.0 | -6.4               | 3.9              | 0.11                   | 28 / 27               | -0.01              | 0.02             | 0.63                   | 5 / 5             | -                                | - -                            |
| 19    | <i>CRY1</i>   | 3.3            | 0.2 | -21.0              | 3.9              | 6.99x10 <sup>-08</sup> | 20 / 20               | -0.02              | 0.03             | 0.38                   | 4 / 6             | Dorsalization                    | 88 49 / 56                     |
| 21    | <i>CALCRL</i> | 16.6           | 1.0 | -15.4              | 2.6              | 1.59x10 <sup>-09</sup> | 27 / 30               | 0.07               | 0.06             | 0.24                   | 6 / 6             | Unlooped heart / AV malformation | 57 30 / 53                     |
| 21    | <i>TFPI</i>   | 36.2           | 1.2 | -3.8               | 3.5              | 0.28                   | 19 / 23               | -0.08              | 0.05             | 0.21                   | 5 / 3             | Edema                            | 36 5 / 14                      |

Locus, the heart rate locus identified by GWAS; Gene, the candidate gene located within ± 500 kb of the GWAS association for which an obvious ortholog is targeted by injecting morpholino oligonucleotides in *Dani rerio* (zebrafish) embryos; Expression (%), the expression of the ortholog in embryos injected with morpholino versus PBS, measured 48 h post-fertilization using qPCR; beta<sub>HR</sub> and SE<sub>HR</sub>, the heart rate of embryos injected with morpholino versus PBS; N<sub>HR</sub>, x / y indicates that data is available for x embryos injected with morpholino and y injected with PBS; beta<sub>FS</sub> and SE<sub>HR</sub>, the fractional shortening of embryos injected with morpholino versus PBS. Fractional shortening is calculated as the end-diastolic diameter of the ventricular chamber divided by its end-systolic diameter; N<sub>FS</sub>, analogue to N<sub>HR</sub>; N<sub>p</sub>, x / y indicates that x of y examined embryos injected with morphilino show the phenotype. Data are sorted by locus and subsequently by beta<sub>HR</sub>.

**Supplementary Table 30 - Characteristics of *Drosophila melanogaster* pupae and *Danio rerio* embryos transfected for orthologs of candidate genes for heart rate**

| Locus | Gene                     | <i>Drosophila melanogaster</i> pupae                                                                       | <i>Danio rerio</i> embryos                                         |
|-------|--------------------------|------------------------------------------------------------------------------------------------------------|--------------------------------------------------------------------|
| 3     | <i>TRIP6</i>             | Reduced heart rate at rest                                                                                 | -                                                                  |
|       | <i>ACHE</i>              | Reduced heart rate at rest; increased risk of arrhythmia post-tachypacing                                  | -                                                                  |
|       | <i>PCOLCE</i>            | Reduced heart rate at rest; increased risk of arrhythmia post-tachypacing                                  | -                                                                  |
|       | <i>UFSP1</i>             | Reduced heart rate at rest                                                                                 | -                                                                  |
|       | <i>EPHB4</i>             | Reduced heart rate at rest                                                                                 | -                                                                  |
|       | <i>SERBP1</i>            | No associations                                                                                            | -                                                                  |
|       | <i>TIMP1</i>             | No associations                                                                                            | -                                                                  |
| 4     | <i>PLXNA2</i>            | Reduced heart rate at rest                                                                                 | -                                                                  |
|       | <i>CD55 / CD46 / CR1</i> | No associations                                                                                            | -                                                                  |
| 5     | <i>FADS1</i>             | Reduced heart rate at rest                                                                                 | -                                                                  |
|       | <i>FADS2</i>             | -                                                                                                          | Reduced heart rate; blood pooling (78%)                            |
|       | <i>FADS3</i>             | Reduced heart rate at rest; increased risk of arrhythmia post-tachypacing                                  | -                                                                  |
|       | <i>BEST1</i>             | -                                                                                                          | Reduced heart rate; edema (35%)                                    |
|       | <i>FTH1</i>              | No associations                                                                                            | -                                                                  |
| 9     | <i>TTN</i>               | Reduced heart rate at rest                                                                                 | -                                                                  |
| 12    | <i>MFN1</i>              | Reduced heart rate at rest and post-tachypacing; increased risk of arrhythmia at rest and post-tachypacing | Reduced heart rate; edema (73%)                                    |
| 13    | <i>FLRT2</i>             | No associations                                                                                            | -                                                                  |
| 14    | <i>CHRM2</i>             | Reduced heart rate at rest                                                                                 | -                                                                  |
| 15    | <i>NKX2-5</i>            | No associations                                                                                            | -                                                                  |
| 16    | <i>GNG11</i>             | Reduced heart rate at rest                                                                                 | -                                                                  |
|       | <i>TFPI2</i>             | -                                                                                                          | Edema (64%)                                                        |
|       | <i>COL1A2</i>            | -                                                                                                          | Reduced fractional shortening                                      |
| 17    | <i>HTR2B</i>             | No associations                                                                                            | Reduced heart rate; unlooped heart (33%)                           |
|       | <i>NCL</i>               | -                                                                                                          | Reduced heart rate; unlooped heart (31%)                           |
| 18    | <i>PLD1</i>              | Reduced heart rate at rest                                                                                 | Reduced heart rate; unlooped heart (51%)                           |
|       | <i>GHSR</i>              | Reduced heart rate at rest                                                                                 | No associations                                                    |
| 19    | <i>CRY1</i>              | Reduced heart rate at rest                                                                                 | Reduced heart rate; dorsalization (88%)                            |
| 21    | <i>TFPI</i>              | -                                                                                                          | Edema (57%)                                                        |
|       | <i>CALCRL</i>            | No associations                                                                                            | Reduced heart rate; unlooped heart and AV canal malformation (57%) |

Locus, the heart rate locus identified by GWAS; Gene, the candidate gene located within  $\pm$  500 kb of the GWAS association for which an ortholog is targeted by RNAi in *Drosophila melanogaster* pupae and by morpholino oligonucleotides in *Danio rerio*.

Proportions between brackets show the penetrance in *Danio rerio* embryos.

## 2 SUPPLEMENTARY NOTE

### 2.1 Candidate genes within the confirmed heart rate loci

#### Cardiac embryonic development proteins

- **FLRT2 (locus 13):** The fibronectin leucine-rich repeat transmembrane protein (*FLRT2*) is required in the epicardium to promote heart morphogenesis<sup>1</sup>.
- **NKX2-5 (locus 15):** The transcription factor *NKX2-5*, which is abundantly expressed in the adult heart, is essential for early embryonic cardiac development<sup>2-4</sup>. Mutations in *NKX2-5* cause congenital heart diseases and atrio-ventricular conduction block<sup>5-7</sup>.
- **PLD1 (locus 18):** phospholipase D1 (*PLD1*) hydrolyzes phosphatidylcholine to phosphatidic acid and choline. Temporal changes in expression of *PLD1* suggest a role in proliferation and differentiation of cardiomyocytes during early postnatal development in rats<sup>8</sup>, whereas changes in *PLD1* protein content and activity following myocardial infarction induced in rats suggest a role in the pathophysiology of congestive heart failure<sup>9</sup>.

#### Cardiac conduction proteins

- **GJA1 (locus 2):** *GJA* encodes connexin 43, the major cardiac gap junction channel that is responsible for intercellular conductance in the ventricles and synchronized contraction of the heart<sup>10</sup>. Cardiac expression of connexin 43 is reduced in patients with heart failure<sup>11</sup> and mutations in *GJA1* have been associated with atrial fibrillation<sup>12</sup>.
- **ACHE (Locus 3):** Acetylcholinesterase, encoded by *ACHE*, hydrolyzes the neurotransmitter acetylcholine at neuromuscular junctions, thereby terminating signal transmission<sup>13</sup>.
- **HCN4 (locus 11):** The hyperpolarization-activated cyclic nucleotide-gated channel 4 (*HCN4*), expressed in the sinus node, is the major channel mediating sympathetic stimulation of (embryonic) pacemaker activity<sup>14,15</sup>. Mutations in *HCN4* have been

associated with sinus nodal dysfunction<sup>16</sup> and bradycardia<sup>17</sup>. Cardiac knockout of the gene in adult mice resulted in severe bradycardia and heart arrest within ~5 days<sup>18</sup>. Ivabradine, a selective heart rate-reducing agent, acts as an open channel blocker of *HCN4*<sup>19</sup>.

- ***CHRM2* (locus 14):** The M2-muscarinic acetylcholine receptor (*CHRM2*) is primarily expressed in the heart<sup>20</sup> and plays an important role in mediating parasympathetic control of cardiac functions such as heart rate, conduction and contractility<sup>21</sup>. A mutation in *CHRM2* has been associated with dilated cardiomyopathy, sudden death, severe arrhythmia and heart failure<sup>20</sup>.

### Cardiac contractile proteins

- ***MYH6/MYH7* (locus 1):** *MYH6* and *MYH7* encode the fast  $\alpha$ - and slow  $\beta$ -myosin heavy chain (MHC) isoforms, respectively.  $\alpha$ -MHC is mainly expressed in atrial tissue<sup>22</sup>, while  $\beta$ -MHC comprises 95% of functional myosin heavy chain protein present in adult ventricles.<sup>23</sup> Mutations in *MYH6* and *MYH7* have been associated with atrial septal defect<sup>24</sup> (*MYH6*), dilated<sup>25</sup> and familial hypertrophic<sup>26</sup> cardiomyopathy and sick sinus syndrome<sup>27</sup> (*MYH6*).
- ***TTN* (locus 9):** Titin plays a key role in myocardial elasticity and the Frank Starling mechanism<sup>28,29</sup>. Titin comes in two isoforms: a stiff (N2B) isoform and a more compliant (N2BA) isoform, which are differentially expressed in the left and right heart, as well as in atria and ventricles<sup>30</sup>. Mutations in *TTN* cause dilated cardiomyopathy<sup>31</sup>.

### Calcium regulation proteins

- ***FADS2/FADS1* (locus 5):**  $\Delta^6$ -desaturase (*FADS2*) catalyzes the reaction forming  $\gamma$ -linoleic acid from linoleic acid ( $\omega$ -6 fatty acid) as well as the reaction forming eicosapentaenoic acid from  $\alpha$ -linoleic acid ( $\omega$ -3 fatty acid);  $\Delta^5$ -desaturase (*FADS1*) catalyses the reaction forming arachidonic acid from  $\gamma$ -linoleic acid. Arachidonic acid releases  $\text{Ca}^{2+}$  from the sarcoplasmic reticulum<sup>32</sup>, which is integral to impulse



propagation, whereas  $\omega$ -3 fatty acids have repeatedly been associated with reduced risk of ischaemia-induced arrhythmias and sudden cardiac death<sup>33,34</sup> and may reduce heart rate<sup>34,35</sup>. Variants in/near *FADS1* and *FADS2* have previously been associated with  $\omega$ -3 and  $\omega$ -6 acid levels<sup>36-38</sup>, total and LDL cholesterol levels<sup>38,39</sup> and risk of coronary artery disease<sup>36,40</sup>.

- ***PLN* (locus 6):** Phospholamban (*PLN*) is a key regulator of cardiac diastolic function and is involved in intracellular calcium regulation in cardiac muscle<sup>41</sup>. Mutations in *PLN* cause hypertrophic<sup>42,43</sup> and dilated<sup>41,44</sup> cardiomyopathy.

### Angiogenesis and endothelial function proteins

- ***EPHB4* (locus 3):** Ephrin B4 (*EPHB4*) is a potent angiogenic factor.<sup>45</sup> Mice lacking *EPHB4* are characterized by early embryonic lethality with disturbed arteriovenous differentiation<sup>46,47</sup>.
- ***TIMP1* (locus 3):** Tissue inhibitor of metalloproteinase-1 (*TIMP1*) has an inhibitory effect on angiogenesis<sup>48</sup>. Increased *TIMP1* protein levels have been observed in myocardial infarction<sup>49</sup>, atrial fibrillation<sup>50</sup> and heart failure patients<sup>51</sup>. Variants in *TIMP1* have been associated with abdominal aortic aneurisms<sup>52</sup>.
- ***PLXNA2* (locus 4):** The neurovascular guiding molecule and angiogenic factor semaphorin 3C (*SEMA3C*) and its receptor plexin A2 (*PLXNA2*) appear to be regulated directly by *GATA6*. Mutations in *GATA6* cause human cardiac outflow tract defects by disrupting semaphorin-plexin signaling<sup>53</sup>.
- ***TFPI2* (locus 16):** Tissue factor pathway inhibitor-2 has direct anti-angiogenic effects on endothelial cells<sup>54</sup>. Methylation of *TFPI-2* was observed in atherosclerotic plaques, but not in control arteries<sup>55</sup>.
- ***CALCRL* (locus 21):** Calcitonin receptor-like receptor (*CALCRL*) acts as a receptor for adrenomedullin<sup>56</sup>, an autocrine regulator of local vasodilatation<sup>57</sup> and endothelial growth<sup>58</sup> that is expressed in cardiomyocytes<sup>59</sup>. Mice lacking the gene have cardiovascular defects and embryonic lethality<sup>56</sup>.

### Other pathways

- **MFN1 (locus 12):** Mitofusion 1 (*MFN1*) controls mitochondrial fusion in mammalian cells and its elimination induces mitochondrial fragmentation<sup>60</sup>. *MFN1* is increased in dilated cardiomyopathy and failing human heart<sup>61</sup>.
- **HTR2B (locus 17):** The 5-hydroxytryptamine (serotonin) receptor 2B (*HTR2B*) mediates regulation of cardiovascular functions and impulsive behavior<sup>62</sup>. Inhibiting *HTR2B* in incubating cells increases fat accumulation, similar to the phenotype observed after receptor knock-down<sup>63</sup>.
- **CRY1 (locus 19):** Cryptochrome 1 (*CRY1*) is expressed in human heart<sup>64</sup> and plays a role in circadian rhythm by potently inhibiting BMAL1-induced transcription<sup>65</sup>. A circadian rhythm of *CRY1* expression was shown in mouse<sup>66</sup> but not human<sup>64</sup> myocardium.
- **TFPI (locus 21):** Tissue factor pathway inhibitor (*TFPI*) is involved in the process of thrombin generation<sup>67</sup>. TFPI levels have been associated with carotid artery disease and coronary artery calcium<sup>68</sup>.

## References

- 1 Muller, P. S. *et al.* The fibronectin leucine-rich repeat transmembrane protein Flrt2 is required in the epicardium to promote heart morphogenesis. *Development* **138**, 1297-1308 (2011).
- 2 Briggs, L. E. *et al.* Perinatal loss of Nkx2-5 results in rapid conduction and contraction defects. *Circ Res* **103**, 580-590 (2008).
- 3 Riazi, A. M. *et al.* NKX2-5 regulates the expression of beta-catenin and GATA4 in ventricular myocytes. *PLoS One* **4**, e5698 (2009).
- 4 Toko, H. *et al.* Csx/Nkx2-5 is required for homeostasis and survival of cardiac myocytes in the adult heart. *J Biol Chem* **277**, 24735-24743 (2002).
- 5 Ikeda, Y. *et al.* Novel point mutation in the cardiac transcription factor CSX/NKX2.5 associated with congenital heart disease. *Circ J* **66**, 561-563 (2002).
- 6 Inga, A., Reamon-Buettner, S. M., Borlak, J. & Resnick, M. A. Functional dissection of sequence-specific NKX2-5 DNA binding domain mutations associated with human heart septation defects using a yeast-based system. *Human molecular genetics* **14**, 1965-1975 (2005).
- 7 McElhinney, D. B., Geiger, E., Blinder, J., Benson, D. W. & Goldmuntz, E. NKX2.5 mutations in patients with congenital heart disease. *J Am Coll Cardiol* **42**, 1650-1655 (2003).
- 8 Moon, C. *et al.* Transient expression of phospholipase D1 during heart development in rats. *J Vet Med Sci* **70**, 411-413 (2008).
- 9 Dent, M. R., Singal, T., Dhalla, N. S. & Tappia, P. S. Expression of phospholipase D isozymes in scar and viable tissue in congestive heart failure due to myocardial infarction. *J Cell Mol Med* **8**, 526-536 (2004).
- 10 Jongsma, H. J. & Wilders, R. Gap junctions in cardiovascular disease. *Circ Res* **86**, 1193-1197 (2000).
- 11 Ai, X. & Pogwizd, S. M. Connexin 43 downregulation and dephosphorylation in nonischemic heart failure is associated with enhanced colocalized protein phosphatase type 2A. *Circ Res* **96**, 54-63 (2005).
- 12 Thibodeau, I. L. *et al.* Paradigm of genetic mosaicism and lone atrial fibrillation: physiological characterization of a connexin 43-deletion mutant identified from atrial tissue. *Circulation* **122**, 236-244 (2010).
- 13 Dvir, H., Silman, I., Harel, M., Rosenberry, T. L. & Sussman, J. L. Acetylcholinesterase: from 3D structure to function. *Chem Biol Interact* **187**, 10-22 (2010).
- 14 Stieber, J. *et al.* The hyperpolarization-activated channel HCN4 is required for the generation of pacemaker action potentials in the embryonic heart. *Proc Natl Acad Sci U S A* **100**, 15235-15240 (2003).
- 15 Stieber, J., Hofmann, F. & Ludwig, A. Pacemaker channels and sinus node arrhythmia. *Trends Cardiovasc Med* **14**, 23-28 (2004).
- 16 Nof, E. *et al.* Point mutation in the HCN4 cardiac ion channel pore affecting synthesis, trafficking, and functional expression is associated with familial asymptomatic sinus bradycardia. *Circulation* **116**, 463-470 (2007).
- 17 Milanesi, R., Baruscotti, M., Gneschi-Ruscione, T. & DiFrancesco, D. Familial sinus bradycardia associated with a mutation in the cardiac pacemaker channel. *The New England journal of medicine* **354**, 151-157 (2006).
- 18 Baruscotti, M. *et al.* Deep bradycardia and heart block caused by inducible cardiac-specific knockout of the pacemaker channel gene Hcn4. *Proc Natl Acad Sci U S A* **108**, 1705-1710 (2011).
- 19 Bucchi, A., Tognati, A., Milanesi, R., Baruscotti, M. & DiFrancesco, D. Properties of ivabradine-induced block of HCN1 and HCN4 pacemaker channels. *J Physiol* **572**, 335-346 (2006).
- 20 Zhang, L. *et al.* A missense mutation in the CHRM2 gene is associated with familial dilated cardiomyopathy. *Circ Res* **102**, 1426-1432 (2008).
- 21 Wang, H. *et al.* Expression of multiple subtypes of muscarinic receptors and cellular distribution in the human heart. *Mol Pharmacol* **59**, 1029-1036 (2001).

- 22 Kurabayashi, M., Tsuchimochi, H., Komuro, I., Takaku, F. & Yazaki, Y. Molecular cloning and characterization of human cardiac alpha- and beta-form myosin heavy chain complementary DNA clones. Regulation of expression during development and pressure overload in human atrium. *The Journal of clinical investigation* **82**, 524-531 (1988).
- 23 Nakao, K., Minobe, W., Roden, R., Bristow, M. R. & Leinwand, L. A. Myosin heavy chain gene expression in human heart failure. *The Journal of clinical investigation* **100**, 2362-2370 (1997).
- 24 Ching, Y. H. *et al.* Mutation in myosin heavy chain 6 causes atrial septal defect. *Nature genetics* **37**, 423-428 (2005).
- 25 Carniel, E. *et al.* Alpha-myosin heavy chain: a sarcomeric gene associated with dilated and hypertrophic phenotypes of cardiomyopathy. *Circulation* **112**, 54-59 (2005).
- 26 Tanigawa, G. *et al.* A molecular basis for familial hypertrophic cardiomyopathy: an alpha/beta cardiac myosin heavy chain hybrid gene. *Cell* **62**, 991-998 (1990).
- 27 Holm, H. *et al.* A rare variant in MYH6 is associated with high risk of sick sinus syndrome. *Nature genetics* **43**, 316-320 (2011).
- 28 Fukuda, N. & Granzier, H. L. Titin/connectin-based modulation of the Frank-Starling mechanism of the heart. *J Muscle Res Cell Motil* **26**, 319-323 (2005).
- 29 Wu, Y., Labeit, S., Lewinter, M. M. & Granzier, H. Titin: an endosarcomeric protein that modulates myocardial stiffness in DCM. *J Card Fail* **8**, S276-286 (2002).
- 30 Kruger, M. & Linke, W. A. Titin-based mechanical signalling in normal and failing myocardium. *J Mol Cell Cardiol* **46**, 490-498 (2009).
- 31 Gerull, B. *et al.* Mutations of TTN, encoding the giant muscle filament titin, cause familial dilated cardiomyopathy. *Nature genetics* **30**, 201-204 (2002).
- 32 Dettbarn, C. & Palade, P. Arachidonic acid-induced Ca<sup>2+</sup> release from isolated sarcoplasmic reticulum. *Biochem Pharmacol* **45**, 1301-1309 (1993).
- 33 London, B. *et al.* Omega-3 fatty acids and cardiac arrhythmias: prior studies and recommendations for future research: a report from the National Heart, Lung, and Blood Institute and Office Of Dietary Supplements Omega-3 Fatty Acids and their Role in Cardiac Arrhythmogenesis Workshop. *Circulation* **116**, e320-335 (2007).
- 34 Richardson, E. S., Iaizzo, P. A. & Xiao, Y. F. Electrophysiological mechanisms of the anti-arrhythmic effects of omega-3 fatty acids. *J Cardiovasc Transl Res* **4**, 42-52 (2011).
- 35 Billman, G. E. & Harris, W. S. Effect of dietary omega-3 fatty acids on the heart rate and the heart rate variability responses to myocardial ischemia or submaximal exercise. *American journal of physiology. Heart and circulatory physiology* **300**, H2288-2299 (2011).
- 36 Kwak, J. H. *et al.* FADS gene polymorphisms in Koreans: association with omega6 polyunsaturated fatty acids in serum phospholipids, lipid peroxides, and coronary artery disease. *Atherosclerosis* **214**, 94-100 (2011).
- 37 Schaeffer, L. *et al.* Common genetic variants of the FADS1 FADS2 gene cluster and their reconstructed haplotypes are associated with the fatty acid composition in phospholipids. *Human molecular genetics* **15**, 1745-1756 (2006).
- 38 Tanaka, T. *et al.* Genome-wide association study of plasma polyunsaturated fatty acids in the InCHIANTI Study. *PLoS genetics* **5**, e1000338 (2009).
- 39 Aulchenko, Y. S. *et al.* Loci influencing lipid levels and coronary heart disease risk in 16 European population cohorts. *Nature genetics* **41**, 47-55 (2009).
- 40 Lettre, G. *et al.* Genome-wide association study of coronary heart disease and its risk factors in 8,090 African Americans: the NHLBI CARE Project. *PLoS genetics* **7**, e1001300 (2011).
- 41 Schmitt, J. P. *et al.* Dilated cardiomyopathy and heart failure caused by a mutation in phospholamban. *Science (New York, N.Y)* **299**, 1410-1413 (2003).
- 42 Landstrom, A. P., Adekola, B. A., Bos, J. M., Ommen, S. R. & Ackerman, M. J. PLN-encoded phospholamban mutation in a large cohort of hypertrophic cardiomyopathy cases: summary of the literature and implications for genetic testing. *Am Heart J* **161**, 165-171 (2011).

- 43 Minamisawa, S. *et al.* Mutation of the phospholamban promoter associated with hypertrophic cardiomyopathy. *Biochem Biophys Res Commun* **304**, 1-4 (2003).
- 44 Haghghi, K. *et al.* A mutation in the human phospholamban gene, deleting arginine 14, results in lethal, hereditary cardiomyopathy. *Proc Natl Acad Sci U S A* **103**, 1388-1393 (2006).
- 45 Palmer, A. *et al.* EphrinB phosphorylation and reverse signaling: regulation by Src kinases and PTP-BL phosphatase. *Mol Cell* **9**, 725-737 (2002).
- 46 Adams, R. H. *et al.* Roles of ephrinB ligands and EphB receptors in cardiovascular development: demarcation of arterial/venous domains, vascular morphogenesis, and sprouting angiogenesis. *Genes Dev* **13**, 295-306 (1999).
- 47 Wang, H. U., Chen, Z. F. & Anderson, D. J. Molecular distinction and angiogenic interaction between embryonic arteries and veins revealed by ephrin-B2 and its receptor Eph-B4. *Cell* **93**, 741-753 (1998).
- 48 Miyagi, M., Aoyagi, K., Kato, S. & Shirouzu, K. The TIMP-1 gene transferred through adenovirus mediation shows a suppressive effect on peritoneal metastases from gastric cancer. *Int J Clin Oncol* **12**, 17-24 (2007).
- 49 Halapas, A. *et al.* Serum levels of the osteoprotegerin, receptor activator of nuclear factor kappa-B ligand, metalloproteinase-1 (MMP-1) and tissue inhibitors of MMP-1 levels are increased in men 6 months after acute myocardial infarction. *Clin Chem Lab Med* **46**, 510-516 (2008).
- 50 Polyakova, V., Miyagawa, S., Szalay, Z., Risteli, J. & Kostin, S. Atrial extracellular matrix remodelling in patients with atrial fibrillation. *J Cell Mol Med* **12**, 189-208 (2008).
- 51 Barton, P. J. *et al.* Increased expression of extracellular matrix regulators TIMP1 and MMP1 in deteriorating heart failure. *J Heart Lung Transplant* **22**, 738-744 (2003).
- 52 Ogata, T. *et al.* Genetic analysis of polymorphisms in biologically relevant candidate genes in patients with abdominal aortic aneurysms. *J Vasc Surg* **41**, 1036-1042 (2005).
- 53 Kodo, K. *et al.* GATA6 mutations cause human cardiac outflow tract defects by disrupting semaphorin-plexin signaling. *Proc Natl Acad Sci U S A* **106**, 13933-13938 (2009).
- 54 Ivanciu, L., Gerard, R. D., Tang, H., Lupu, F. & Lupu, C. Adenovirus-mediated expression of tissue factor pathway inhibitor-2 inhibits endothelial cell migration and angiogenesis. *Arterioscler Thromb Vasc Biol* **27**, 310-316 (2007).
- 55 Zawadzki, C. *et al.* Tissue factor pathway inhibitor-2 gene methylation is associated with low expression in carotid atherosclerotic plaques. *Atherosclerosis* **204**, e4-14 (2009).
- 56 Dackor, R. T. *et al.* Hydrops fetalis, cardiovascular defects, and embryonic lethality in mice lacking the calcitonin receptor-like receptor gene. *Mol Cell Biol* **26**, 2511-2518 (2006).
- 57 Nakamura, M. *et al.* Potent and long-lasting vasodilatory effects of adrenomedullin in humans. Comparisons between normal subjects and patients with chronic heart failure. *Circulation* **95**, 1214-1221 (1997).
- 58 Nikitenko, L. L., MacKenzie, I. Z., Rees, M. C. & Bicknell, R. Adrenomedullin is an autocrine regulator of endothelial growth in human endometrium. *Mol Hum Reprod* **6**, 811-819 (2000).
- 59 Nishimori, T. *et al.* Dexamethasone-induced up-regulation of adrenomedullin and atrial natriuretic peptide genes in cultured rat ventricular myocytes. *J Mol Cell Cardiol* **29**, 2125-2130 (1997).
- 60 Zhang, Y. & Chan, D. C. New insights into mitochondrial fusion. *FEBS Lett* **581**, 2168-2173 (2007).
- 61 Chen, L., Gong, Q., Stice, J. P. & Knowlton, A. A. Mitochondrial OPA1, apoptosis, and heart failure. *Cardiovasc Res* **84**, 91-99 (2009).
- 62 Bevilacqua, L. *et al.* A population-specific HTR2B stop codon predisposes to severe impulsivity. *Nature* **468**, 1061-1066 (2010).

- 63 Sohle, J. *et al.* Identification of new genes involved in human adipogenesis and fat storage. *PLoS One* **7**, e31193 (2012).
- 64 Leibetseder, V. *et al.* Clock genes display rhythmic expression in human hearts. *Chronobiology international* **26**, 621-636 (2009).
- 65 Langmesser, S., Tallone, T., Bordon, A., Rusconi, S. & Albrecht, U. Interaction of circadian clock proteins PER2 and CRY with BMAL1 and CLOCK. *BMC molecular biology* **9**, 41 (2008).
- 66 Huang, J., Lu, C., Chen, S., Hua, L. & Qian, R. Postnatal ontogenesis of clock genes in mouse suprachiasmatic nucleus and heart. *Lipids in health and disease* **9**, 22 (2010).
- 67 Golino, P. *et al.* Involvement of tissue factor pathway inhibitor in the coronary circulation of patients with acute coronary syndromes. *Circulation* **108**, 2864-2869 (2003).
- 68 Mitchell, C. T., Kamineni, A., Palmas, W. & Cushman, M. Tissue factor pathway inhibitor, vascular risk factors and subclinical atherosclerosis: the Multi-Ethnic Study of Atherosclerosis. *Atherosclerosis* **207**, 277-283 (2009).

## 2.2 Acknowledgments

**ACTS (Alcohol Challenge Twin Study)** - We are grateful for the twins who participated in the Alcohol Challenge Twin Study and all those who helped in carrying it out. We would also like to thank staff at the Queensland Institute of Medical Research: Anjali Henders, Megan Campbell and staff of the Molecular Epidemiology Laboratory (sample processing and preparation); Sarah Medland, Dale Nyholt and Scott Gordon (imputation and genotyping QC). Phenotype collection was part of the Alcohol Challenge Twin Study which was funded by the Australian Brewers Foundation. Collection of DNA and genotyping was funded by grants from the Australian National Health and Medical Research Council (NHMRC) grant 159101; and U.S. National Institutes of Health (AA013320, AA013321, AA013326 and AA014041). Statistical analyses were carried out on the Genetic Cluster Computer (<http://www.geneticcluster.org>), which is financially supported by the Netherlands Scientific Organization (NWO 480-05-003). The funders had no role in study design, data collection and analysis, decision to publish, or preparation of the manuscript.

**ADVANCE (Atherosclerosis Disease, Vascular Function and Genetic Epidemiology)** - The ADVANCE study was supported by a grant from the Reynold's Foundation; and NHLBI grant HL087647.

**AGES (Age, Gene/Environment Susceptibility Reykjavik Study)** - The Age, Gene/Environment Susceptibility Reykjavik Study has been funded by National Institutes of Health (contract N01-AG-12100); the National Institute of Aging Intramural Research Program; Hjartavernd (the Icelandic Heart Association); and the Althingi (the Icelandic Parliament).

**ALSPAC (Avon Longitudinal Study of Parents And Children)** - David M Evans is supported by a Medical Research Council New Investigator Award (MRC G0800582 to David M Evans). John P Kemp is funded by a Wellcome Trust 4-year PhD studentship in molecular, genetic, and life course epidemiology (WT083431MA). We are extremely grateful to all the families who took part in this study, the midwives for their help in recruiting them and the whole ALSPAC team, which includes interviewers, computer and laboratory technicians, clerical workers, research scientists, volunteers, managers, receptionists and nurses. The UK Medical Research Council; the Wellcome Trust; and the University of Bristol; provide core support for ALSPAC. We thank the Sample Logistics and Genotyping Facilities at the Wellcome Trust Sanger Institute and also 23andME for generating the ALSPAC GWAS data. This publication is the work of the authors and they will serve as guarantors for the contents of this paper.

**ARIC, CHARGE (Atherosclerosis Risk in Communities Study)** - ARIC is carried out as a collaborative study supported by National Heart, Lung, and Blood Institute contracts (HHSN268201100005C, HHSN268201100006C, HHSN268201100007C, HHSN268201100008C, HHSN268201100009C, HHSN268201100010C, HHSN268201100011C, and HHSN268201100012C); R01HL087641, R01HL59367 and R01HL086694; National Human Genome Research Institute contract U01HG004402; and National Institutes of Health contracts N01AG12109, and HHSN268200625226C. The authors thank the staff and participants of the ARIC study for their important contributions. Infrastructure was partly supported by Grant Number UL1RR025005, a component of the National Institutes of Health and NIH Roadmap for Medical Research.

**ASCOT (Anglo-Scandinavian Cardiac Outcomes Trial)** - Neil R Poulter received funding from the UK National Institute for Health Research Biomedical Research Centre funding scheme and senior investigator award. Peter S Sever received a BRC Award to Imperial College NHS Health Care Trust.

**ATBC (Alpha-Tocopherol, Beta-Carotene Cancer Prevention Study)** - The ATBC Study was supported in part by U.S. Public Health Service (contract numbers N01-CN-45165, N01-RC-45035, N01-RC-37004, and HHSN261201000006C) from the National

Cancer Institute, Department of Health and Human Services; and Intramural Research Program of the U.S. National Cancer Institute.

**B58C T1DGC (British 1958 Birth Cohort (Type 1 Diabetes Genetic Consortium Controls))** - The B58C-T1DGC genotyping utilized resources provided by the Type 1 Diabetes Genetics Consortium, a collaborative clinical study sponsored by the National Institute of Diabetes and Digestive and Kidney Diseases (NIDDK); National Institute of Allergy and Infectious Diseases (NIAID); National Human Genome Research Institute (NHGRI); National Institute of Child Health and Human Development (NICHD); and Juvenile Diabetes Research Foundation International (JDRF) and supported by U01 DK062418. B58C-T1DGC GWAS data were deposited by the Diabetes and Inflammation Laboratory, Cambridge Institute for Medical Research (CIMR), University of Cambridge, which is funded by Juvenile Diabetes Research Foundation International; the Wellcome Trust; and the National Institute for Health Research Cambridge Biomedical Research Centre; the CIMR is in receipt of a Wellcome Trust Strategic Award (079895).

**B58C WTCCC (British 1958 Birth Cohort (Wellcome trust case control consortium))** - We acknowledge use of phenotype and genotype data from the British 1958 Birth Cohort DNA collection, funded by the Medical Research Council grant G0000934; and the Wellcome Trust grant 068545/Z/02. (<http://www.b58cgene.sgul.ac.uk/>). Genotyping for the B58C-WTCCC subset was funded by the Wellcome Trust grant 076113/B/04/Z.

**BLSA (Baltimore Longitudinal Study of Aging)** - This study was supported in part by the Intramural Research Program of the NIH, National Institute on Aging. A portion of that support was through a R&D contract with MedStar Research Institute.

**Bright (British Genetics of Hypertension Study)** - The MRC Bright Study was funded by the Medical Research Council Programme G952010, The Wellcome Trust Case Control Consortium and is part of the portfolio of the Barts and The London NIHR Cardiovascular Biomedical Research Unit. Nilesh J Samani holds a Chair funded by the British Heart Foundation. The BRIGHT Study is part of the portfolio of research supported by the Leicester NIHR Biomedical Research Unit in Cardiovascular Disease. Sandosh Padmanabhan is funded by a British Heart Foundation travel fellowship to the Broad Institute of Harvard and MIT. Toby Johnson is a Wellcome Trust University Award Holder.

**CHS, CHARGE (Cardiovascular Health Study)** - The CHS research was supported by NHLBI contracts N01-HC-85239, N01-HC-85079 through N01-HC-85086; N01-HC-35129, N01-HC-15103, N01-HC-55222, N01-HC-75150, N01-HC-45133 and NHLBI grants HL080295, HL075366, HL087652, HL105756 with additional contribution from NINDS. Additional support was provided through AG-023629, AG-15928, AG-20098, and AG-027058 from the NIA. See also <http://www.chs-nhlbi.org/pi.htm>. DNA handling and genotyping was supported in part by National Center for Research Resources grant M01-RR00425 to the Cedars-Sinai General Clinical Research Center Genotyping core and National Institute of Diabetes and Digestive and Kidney Diseases grant DK063491 to the Southern California Diabetes Endocrinology Research Center.

**CoLAUS (Cohorte Lausannoise)** - The CoLaus study was supported by research grants from GlaxoSmithKline; the Faculty of Biology and Medicine of Lausanne, Switzerland; and the Swiss National Science Foundation (grant no: 33CSCO-122661). Gérard Waeber and Peter Vollenweider received an unrestricted grant from GSK to build the CoLaus study. The authors express their gratitude to the participants in the Lausanne CoLaus study and to the investigators who have contributed to the recruitment, in particular Vincent Mooser, Dawn Waterworth, Vladimir Mayor, Mathieu Firmann, Yolande Barreau, Anne-Lise Bastian, Binasa Ramic, Martine Moranville, Martine Baumer, Marcy Sagette, Jeanne Ecoffey and Sylvie Mermoud for data collection.



**COROGENE (COROGENE Study)** – The COROGENE study was supported by the Aarno Koskelo Foundation; the Finnish Foundation for Cardiovascular Research; and the EVO funds of Helsinki University Central Hospital.

**DESIR (Data from an Epidemiological Study on the Insulin Resistance Syndrom)** - DESIR genetic studies were supported in part by the "Conseil Regional Nord-Pas-de-Calais: Fonds européen de développement économique et regional (CPER 2011-2013); Genome Quebec-Genome Canada; and the British Medical Research Council. We acknowledge the Inserm, NB-N' employer.

**DGI (Diabetes Genetics Initiative of Broad Institute of Harvard and MIT, Lund University and Novartis Institutes of Biomedical Research)** – The DGI study was supported by a grant from Novartis. The Botnia PPP study was supported by grants from the Signe and Ane Gyllenberg Foundation; Swedish Cultural Foundation in Finland; Finnish Diabetes Research Society; the Sigrid Juselius Foundation; Folkhälsan Research Foundation; Foundation for Life and Health in Finland; Jakobstad Hospital; Medical Society of Finland; Närpes Research Foundation; the Vasa and Närpes Health centers; the European Community's Seventh Framework Programme (FP7/2007-2013); the European Network for Genetic and Genomic Epidemiology (ENGAGE); the Collaborative European Effort to Develop Diabetes Diagnostics (CEED/2008-2012); and the Swedish Research Council, including a Linné grant (No.31475113580).

**EGCUT (Estonian Genome Centre, University of Tartu)** - EGCUT authors received support from FP7 grants (201413 ENGAGE, 212111 BBMRI, 245536 OPENGENE). EGCUT authors also received targeted financing from Estonian Government (SF0180142s08); and by EU via the European Regional Development Fund, in the frame of Centre of Excellence in Genomics. EGCUT authors would like to acknowledge the personnel of EGCUT, especially Ms Merli Hass, as well as the staff of Estonian Biocenter, especially Mr Viljo Soo. EGCUT data analysis were carried out in part in the High Performance Computing Center of the University of Tartu.

**Ely (Ely Study)** - The MRC Ely Study was supported by the Medical Research Council and the Wellcome Trust. We thank all staff from the MRC Epidemiology Unit Functional Group Team.

**EPIC-NL (European Prospective Investigation into Cancer and Nutrition – Netherlands)** - The EPIC-NL study was funded by "Europe against Cancer" Programme of the European Commission (SANCO); Dutch Ministry of Health, Welfare and Sports (VWS); LK Research Funds; Dutch ZON (Zorg Onderzoek Nederland); and World Cancer Research Fund (WCRF) (The Netherlands). We thank Statistics Netherlands and Netherlands Cancer Registry (NKR) for follow-up data on cancer, cardiovascular disease, vital status and causes of death. Genotyping was funded by grant IGE05012 from the IOP Genomic Programme of NL Agency.

**EPIC-Norfolk (European Prospective Investigation into Cancer and Nutrition Norfolk)** – The EPIC-Norfolk Study is funded by program grants from the Medical Research Council UK; and Cancer Research UK. We thank all staff from the MRC Epidemiology Unit Functional Group Team.

**ERF (Erasmus Rucphen Study)** – The ERF study was supported by grants from the Netherlands Organization for Scientific Research (NOW, Pioneergrant); Erasmus Medical Center; the Centre for Medical Systems Biology (CMSB); and the Netherlands Kidney Foundation. We are grateful to all patients and their relatives, general practitioners and neurologists for their contributions and to P. Veraart for her help in genealogy, Jeannette Vergeer for the supervision of the laboratory work and P. Snijders for his help in data collection.

**FamHS (Family Heart Study)** - The Family Heart Study (FamHS) work was supported in part by NIH grants: 5R01HL08770003, 5R01HL08821502 (M.A.P.) from the NHLBI; and 5R01DK07568102, 5R01DK06833603 from the NIDDK (I.B.B.). The authors thank the staff and participants of the FHS for their important contributions.

**Fenland (Fenland Study)** – The Fenland Study is funded by the Wellcome Trust; the Medical Research Council; the Support Funding programme; Camstrad; and the British Heart Foundation (BHF) (PG/07/108/23369). We are grateful to all volunteers for their time and help and to the General Practitioners and practice staff for help with recruitment. We thank the Fenland Study co-ordination team and the Field Epidemiology team of the MRC-Epidemiology Unit for recruitment and clinical testing.

**FHS (Framingham Heart Study)** - The FHS research was conducted in part using data and resources from the Framingham Heart Study of the National Heart, Lung, and Blood Institute of the National Institutes of Health and Boston University School of Medicine. The analyses reflect intellectual input and resource development from the Framingham Heart Study investigators participating in the SNP Health Association Resource (SHARe) project. This work was partially supported by the National Heart, Lung and Blood Institute's Framingham Heart Study (contract number N01-HC-25195); and its contract with Affymetrix, Inc for genotyping services (contract number N02-HL-6-4278). A portion of this research utilized the Linux Cluster for Genetic Analysis (LinGA-II) funded by the Robert Dawson Evans Endowment of the Department of Medicine at Boston University School of Medicine and Boston Medical Center. Electrocardiographic measurements in the third generation of FHS were supported by grants from the National Institutes of Health and the Doris Duke Charitable Foundation to Christopher Newton-Cheh.

**Fingesture (Fingesture Study)** - The genetic work on this cohort was supported by the Montreal Heart Institute Foundation ([www.fondationicm.org](http://www.fondationicm.org)). Juhani Juntila and Heikki V Huikuri received funds from the Sigrid Juselius Foundation ([www.sigridjuselius.fi/foundation](http://www.sigridjuselius.fi/foundation)); Juhani Juntila received funding from Fondation Leducq ([www.fondationleducq.org](http://www.fondationleducq.org)).

**Finrisk07 (Finrisk 2007 Study)** – The FINRISK 2007 survey was primarily funded by the Finnish National Institute for Health and Welfare (THL). The GWAS genotyping was carried out at the Wellcome Trust Sanger Institute, Hinxton, UK. Additional support for genotyping and data analyses was obtained from the SALVE program of the Academy of Finland (grant number 129322 to Markus Perola and 129494 to Veikko Salomaa).

**Fusion (Finland – United States Investigation of NIDDM Genetics)** – Fusion was partly funded by the National Institutes of Health (DK062370). We would like to thank the many Finnish volunteers who generously participated in our study. The Center for Inherited Disease Research performed the GWA genotyping.

**GOOD (The Gothenburg Osteoporosis and Obesity Determinants Study)** - Financial support was received from the Swedish Research Council (K2010-54X-09894-19-3, 2006-3832 and K2010-52X-20229-05-3); the Swedish Foundation for Strategic Research; the ALF/LUA research grant in Gothenburg; the Lundberg Foundation; the Torsten and Ragnar Söderberg's Foundation; Petrus and Augusta Hedlunds Foundation; the Västra Götaland Foundation; the Göteborg Medical Society; the Novo Nordisk foundation; and the European Commission grant HEALTH-F2-2008-201865-GEFOS. We would like to acknowledge Maria Nethander at the Genomics core facility at the University of Gothenburg for statistical analyses. We would like to thank Dr. Tobias A. Knoch, Luc V. de Zeeuw, Anis Abuseiris, and Rob de Graaf as well as their institutions the Erasmus Computing Grid, Rotterdam, The Netherlands, and especially the national German MediGRID and Services@MediGRID part of the German D-Grid, both funded by the German Bundesministerium für Forschung und Technology under grants #01 AK 803 A-H and # 01 IG 07015 G for access to their grid resources. We would also like to thank Karol Estrada, Department of Internal Medicine, Erasmus MC, Rotterdam, Netherlands for advice regarding the grid resources.

**HAPI (Heredity and Phenotype Intervention Heart Study)** – HAPI was funded by grants AG000219, U01 HL72515 and P30 DK072488.

**HBCS (Helsinki Birth Cohort Study)** – We thank all study participants as well as everybody involved in the Helsinki Birth Cohort Study. Helsinki Birth Cohort Study has been supported by grants from the Academy of Finland, the Finnish Diabetes Research Society, Folkhälsan Research Foundation, Novo Nordisk Foundation, Finska Läkaresällskapet, Signe and Ane Gyllenberg Foundation, University of Helsinki, European Science Foundation (EUROSTRESS), Ahokas Foundation, Emil Aaltonen Foundation, Juho Vainio Foundation, and Wellcome Trust (grant number WT089062).

**Health 2000 (Health 2000 / GENMETS sub-study)** – The Health 2000 survey was funded by the Finnish National Institute for Health and Welfare (THL) in collaboration with the National Social Insurance Institution and the five university hospital districts. GENMETS genotyping was sponsored by the Wellcome Trust Sanger Institute, Hinxton, UK. Additional support for genotyping and data analyses was obtained from the SALVE program of the Academy of Finland (grant number 129322 to Markus Perola and 129494 to Veikko Salomaa).

**Health ABC (Health aging and body composition study)** – This research was supported by NIA contracts N01AG62101, N01AG62103 and N01AG62106. The genome-wide association study was funded by NIA grant 1R01AG032098-01A1 to Wake Forest University Health Sciences. Genotyping services were provided by the Center for Inherited Disease Research (CIDR). CIDR is fully funded through a federal contract from the National Institutes of Health to The Johns Hopkins University, contract number HHSN268200782096C. This research was supported in part by the Intramural Research Program of the NIH, National Institute on Aging. Dr Omer T. Njajou is supported by a “Training in Molecular & Genetic Epidemiology of Cancer, National Institutes of Health, National Cancer Institute” grant (R25 CA112355).

**Heritage (Heritage Family Study)** – Heritage received funding from the NIH/NHLBI HL045670 grant. Thanks are expressed to Drs. Arthur Leon, James Skinner and Jack Wilmore (supported by the NIH/NHLBI grants HL-47317, HL-47323, HL-47327 and HL-47321) for their contributions to the data collection.

**HPFS (Health professional follow-up study) / NHS (Nurses Health Study)** – The NHS Breast Cancer GW scan was performed as part of the Cancer Genetic Markers of Susceptibility initiative of the NCI. The current research is supported by CA 40356 and U01-CA98233 from the National Cancer Institute. We particularly acknowledge the contributions of R. Hoover, A. Hutchinson, K. Jacobs and G. Thomas. The NHS/HPFS type 2 diabetes GWAS (U01HG004399) is a component of a collaborative project that includes 13 other GWAS funded as part of the Gene Environment-Association Studies (GENEVA) under the NIH Genes, Environment and Health Initiative (GEI) (U01HG004738, U01HG004422, U01HG004402, U01HG004729, U01HG004726, U01HG004735, U01HG004415, U01HG004436, U01HG004423, U01HG004728 and AHG006033); with additional support from individual NIH Institutes (NIDCR: U01DE018993 and U01DE018903; NIAAA: U10AA008401; NIDA: P01CA089392 and O1DA013423; and NCI: CA63464, CA54281, CA136792 and Z01CP010200). Assistance with phenotype harmonization and genotype cleaning, as well as with general study coordination, was provided by the GENEVA Coordinating Center (U01HG004446). Genotyping was performed at the Broad Institute of MIT and Harvard, with funding support from the NIH GEI (U01HG04424); and Johns Hopkins University Center for Inherited Disease Research, with support from the NIH GEI (U01HG004438); and the NIH contract “High throughput genotyping for studying the genetic contributions to human disease” (HHSN268200782096C). Additional funding for the current research was provided by the National Cancer Institute (NCI: P01CA087969 and P01CA055075); and the National Institute of Diabetes and Digestive and Kidney Diseases (NIDDK: R01DK058845). The NHS/HPFS CHD GWAS was supported by HL35464, HL34594, CA87969 and CA55075 from the National Institutes of Health, with additional support for genotyping from Merck/Rosetta Research Laboratories, North Wales, PA. The NHS/HPFS Kidney GWAS was supported by NIDDK: 5P01DK070756. We acknowledge

the study participants in the HPFS and NHS for their contribution in making this study possible.

**Hypergenes (Hypergenes Study)** - HYPERGENES (funded by EU within FP7, HEALTH-F4-2007-201550). To HYPERGENES consortium took part: 1) University of Milano with Daniele Cusi, Project Coordinator, Fabio Macchiardi, Cristina Barlassina, Erika Salvi, Sara Lupoli, Federica Torri, Maurizio Marconi, Gianna Petrini, Vincenzo Toschi, Giancarlo Mariotti, Maurizio Turiel; 2) University of Leuven, Division of Hypertension and Cardiovascular Rehabilitation, Department of Cardiovascular Diseases, with Robert Fagard, Yu Jin, Tatiana Kuznetsova, Tom Richart, Jan A. Staessen, and Lutgarde Thijs; 3) Jagiellonian University Medical College, Krakow, with Kalina Kawecka-Jaszcz, Katarzyna Stolarz-Skrzypek, Agnieszka Olszanecka, Wiktoria Wojciechowska, Małgorzata Kloch-Badełek; 4) IBM Israel – Science and Technology LTD, with Amnon Shabo, Ariel Frakash, Simona Cohen, Boaz Carmeli, Dan Pelleg, Michal Rosen-Zvi, Hani Neuvrith-Telem; 5) I.M.S. – Istituto di Management Sanitario S.r.l., Milan, with Pietro Conti, Costanza Conti, Mariella D’Alessio, Maurizio Mercurio; 6) Institute of Internal Medicine, Siberian Branch of Russian Academy of Medical Science, Novosibirsk, with Yuri Nikitin, Galina Simonova, Sofia Malyutina, Elena Pello; 7) Imperial College of Science, Technology and Medicine, with Paolo Vineis and Clive J Hoggart; 8) INSERM – Institut National de la Santé et de la Recherche Médicale U772, with Xavier Jeunemaitre, Pierre-François Plouin, Michel Azizi; 9) University of Warwick, Cardiovascular Medicine & Epidemiology Group, Clinical Sciences Research Institute, with Francesco P Cappuccio, Michelle A Miller, Chen Ji; 10) Hypertension and Related Disease Centre-AOU, University of Sassari, Sassari, with Nicola Glorioso, Giuseppe Argiolas, Francesca Fau, Silvia Pitzoi, Emanuela Bulla, Roberta Zaninello, Patrizia Bulla, Simone Fadda, Gianclaudia Cappai, Siria Motroni, Chiara Maria Troffa; 11) STMICROELECTRONICS SRL, with Tony Barbuzzi; 12) Université de Lausanne. Department of Medical Genetics, with Carlo Rivolta, Jacques S. Beckmann, Zoltan Kutalik, Paola Benaglio, Sven Bergmann, Murielle Bochud, Diana Marek; 13) Pharnext S.A.S., Paris, with Daniel Cohen and Ilya Chumakov; 14) Softeco Sismat Spa, Genova, with Stefano Bianchi; 15) Shanghai Institute of Hypertension, with Jiguang Wang and Li Yan; 16) Charles University in Prague. Department of Internal Medicine II, Pilsen, with Jan Filipovsky, Jitka Seidlerova, Otto Mayer Jr., Milena Dolejšova, Jana Hirmerova, Jana Strizova; 17) University of Padova, Department of Clinical and Experimental Medicine, with Valérie Tikhonoff; 18) Medical University of Gdansk, Hypertension Unit, Department of Hypertension and Diabetology, with Krzysztof Narkiewicz, Marzena Chrostowska, Wojciech Sakiewicz, Michal Wojtowicz, Michal Hoffmann; and 19) University Vita-Salute San Raffaele, with Paolo Manunta, Chiara Lanzani, Maria Teresa Sciarone, Lorena Citterio, Laura Zagato, Giuseppe Bianchi; 20) and Catholic University, Campobasso, with Licia Iacoviello. Regarding the present work, cases and controls were recruited within specific cohorts/networks: FLEMENGHO/EPOGH cohort (Coordinator J Staessen, contributors Units 2,3,6,16,17,18); Wandsworth Heart & Stroke Study (WHSS, Coordinator F Cappuccio); Milano-Sassari cohort (coordinator D Cusi); SOPHIA cohort (coordinator N Glorioso); IMMIDIET cohort (coordinator L Iacoviello).

**InCHIANTI (InCHIANTI Study)** - The InCHIANTI baseline study (1998-2000) was supported as a "targeted project" (ICS110.1/RF97.71) by the Italian Ministry of Health (ICS110.1/RF97.71) and in part by the U.S. National Institute on Aging (Contracts: 263 MD 9164 and 263 MD 821336).

**KORA (Kooperative Gesundheitsforschung in der Region Augsburg)** - The KORA Augsburg studies were financed by the Helmholtz Zentrum München, German Research Center for Environmental Health, Neuherberg, Germany; and supported by grants from the German Federal Ministry of Education and Research (BMBF); and by the State of Bavaria. Part of this work was financed by the German National Genome Research Network (NGFN-2 and NGFN-plus); the German National Competence network on atrial fibrillation (AFNET); and the Bioinformatics for the Functional Analysis of Mammalian Genomes program (BFAM) by grants to Stefan Käb [NGFN 01GS0499, 01GS0838 and

AF-Net 01GI0204/N], Anette Peters [NGFN 01GR0803, 01GS0834 and 01EZ0874], H-Erich Wichmann [NGFN 01GI0204] and to Thomas Meitinger [NGFN 01GR0103]. Stefan Kääh is also supported by a grant from Fondation Leducq. Furthermore, this research was supported within the Munich Center of Health Sciences (MC Health) as part of LMUinnovativ.

**Korcula (CROATIA-Korcula)** - The KORCULA study was funded by grants from the Medical Research Council (UK); European Commission Framework 6 project EUROSPAN (Contract No. LSHG-CT-2006-018947); and Republic of Croatia Ministry of Science, Education and Sports research grants to Igor Rudan (108-1080315-0302). We would like to acknowledge the staff of several institutions in Croatia that supported the field work, including but not limited to The University of Split and Zagreb Medical Schools and Croatian Institute for Public Health. The SNP genotyping for the KORCULA cohort was performed in Helmholtz Zentrum München, Neuherberg, Germany.

**LifeLines (LifeLines Study)** - The LifeLines Cohort Study, and generation and management of GWAS genotype data for the LifeLines Cohort Study is supported by the Netherlands Organization of Scientific Research NWO (grant 175.010.2007.006); the Economic Structure Enhancing Fund (FES) of the Dutch government; the Ministry of Economic Affairs; the Ministry of Education, Culture and Science; the Ministry for Health, Welfare and Sports; the Northern Netherlands Collaboration of Provinces (SNN); the Province of Groningen; University Medical Center Groningen; the University of Groningen; Dutch Kidney Foundation; and Dutch Diabetes Research Foundation. We thank Behrooz Alizadeh, Annemieke Boesjes, Marcel Bruinenberg, Noortje Festen, Ilja Nolte, Lude Franke, Mitra Valimohammadi for their help in creating the GWAS database, and Rob Bieringa, Joost Keers, René Oostergo, Rosalie Visser, Judith Vonk for their work related to data-collection and validation. The authors are grateful to the study participants, the staff from the LifeLines Cohort Study and Medical Biobank Northern Netherlands, and the participating general practitioners and pharmacists. LifeLines Scientific Protocol Preparation: Rudolf de Boer, Hans Hillege, Melanie van der Klauw, Gerjan Navis, Hans Ormel, Dirkje Postma, Judith Rosmalen, Joris Slaets, Ronald Stolk, Bruce Wolffenbuttel; LifeLines GWAS Working Group: Behrooz Alizadeh, Marika Boezen, Marcel Bruinenberg, Noortje Festen, Lude Franke, Pim van der Harst, Gerjan Navis, Dirkje Postma, Harold Snieder, Cisca Wijmenga, Bruce Wolffenbuttel. Statistical analyses were carried out on the Genetic Cluster Computer (<http://www.geneticcluster.org>), which is financially supported by the Netherlands Scientific Organization (NWO 480-05-003); along with a supplement from the Dutch Brain Foundation and the VU University Amsterdam.

**Lolipop (London Life Sciences Prospective Population Cohort)** - The LOLIPOP study is supported by the National Institute for Health Research Comprehensive Biomedical Research Centre Imperial College Healthcare NHS Trust; the British Heart Foundation (SP/04/002); the Medical Research Council (G0700931); the Wellcome Trust (084723/Z/08/Z); and the National Institute for Health Research (RP-PG-0407-10371). Paul Elliot is an NIHR Senior Investigator. The funders had no role in study design, data collection and analysis, decision to publish, or preparation of the manuscript. We thank the participants and research staff who made the study possible.

**MESA (The Multi-Ethnic Study of Atherosclerosis)** - MESA and the MESA SHARE project are conducted and supported by the National Heart, Lung, and Blood Institute (NHLBI) in collaboration with MESA investigators. Support is provided by grants and contracts N01 HC-95159, N01-HC-95160, N01-HC-95161, N01-HC-95162, N01-HC-95163, N01-HC-95164, N01-HC-95165, N01-HC-95166, N01-HC-95167, N01-HC-95168, N01-HC-95169, and RR-024156. MESA Air is conducted and supported by the United States Environmental Protection Agency (EPA); in collaboration with MESA Air investigators. Support is provided by grant RD83169701. Funding for SHARE genotyping was provided by NHLBI Contract N02-HL-6-4278.

**MICROS (the Micros Study)** - The MICROS study in South Tyrol was supported by the Austrian Ministry of Health and Department of Educational Assistance; University and Research of the Autonomous Province of Bolzano; and the South Tyrolean Sparkasse Foundation.

**NBS (Nijmegen Biomedical Study)** - The Nijmegen Biomedical Study (NBS) was initiated in 2000 as a large survey among the inhabitants of the municipality of Nijmegen by the departments of Epidemiology, Biostatistics and HTA, Clinical Chemistry, and Endocrinology of the Radboud University Nijmegen Medical Centre (RUNMC) in collaboration with the municipality of Nijmegen and the community health service of Nijmegen. Support was obtained from RUNMC. The measurements of heart rate (and other non-invasive measurements of atherosclerosis (NIMA)) was supported by Grant 2003B057 of the Netherlands Heart Foundation. The genotyping was supported by deCODE Genetics, a biotechnology company in Iceland.

**NESDA (Netherlands Study of Depression and Anxiety)** - NESDA was supported by the Geestkracht program of ZonMW [grant 10-000-1002]; matching funds from universities and mental health care institutes involved in NESDA (GGZ Buitenamstel-Geestgronden, Rivierduinen, University Medical Center Groningen, GGZ Lentis, GGZ Friesland, GGZ Drenthe). Genotyping was funded by the Genetic Association Information Network (GAIN) of the Foundation for the US National Institutes of Health, and analysis was supported by grants from GAIN and the NIMH (MH081802). Genotype data were obtained from dbGaP (<http://www.ncbi.nlm.nih.gov/dbgap>, accession number phs000020.v1.p1).

**NFBC1966 (Northern Finland Birth Cohort 1966)** - Financial support was received from the Academy of Finland (project grants 104781, 120315 and Center of Excellence in Complex Disease Genetics); University Hospital Oulu; Biocenter, University of Oulu, Finland; the European Commission (EURO-BLCS, Framework 5 award QLG1-CT-2000-01643); NHLBI grant 5R01HL087679-02 through the STAMPEED program (1RL1MH083268-01); NIH/NIMH (5R01MH63706:02); ENGAGE project and grant agreement HEALTH-F4-2007-201413; and the Medical Research Council (studentship grant G0500539). The DNA extractions, sample quality controls, biobank up-keeping and aliquotting was performed in the National Public Health Institute, Biomedicum Helsinki, Finland and supported financially by the Academy of Finland and Biocentrum Helsinki. We thank Professor Paula Rantakallio (launch of NFBC1966 and 1986), Ms Outi Tornwall and Ms Minttu Jussila (DNA biobanking).

**NHS (Nurses Health Study)** - see HPFS.

**NSHD (1946 British Birth Cohort)** - NSHD is supported by the Medical Research Council Unit for Lifelong and Healthy Ageing (G0701044). The generation and preparation of MetaboChip genotype data was supported by the Medical Research Council Epidemiology Unit through Medical Research Council Intramural funding and project funding (G0701863). We are grateful to NSHD study members who took part in this data collection for their continuing support.

**NSPHS06 (Northern Swedish Population Health Study 2006)** - The Northern Swedish Population Health Study (NSPHS) was funded by the Swedish Medical Research Council (project number K2007-66X-20270-01-3); and the Foundation for Strategic Research (SSF). The NSPHS as part of EUROSPAN (European Special Populations Research Network) was also supported by European Commission FP6 STRP grant number 01947 (LSHG-CT-2006-01947). This work was also supported by the Swedish Society for Medical Research (Åsa Johansson). The computations were performed on UPPMAX (<http://www.uppmax.uu.se>) resources under project p2008027. The authors are grateful for the contribution of district nurse Svea Hennix for data collection and Inger Jonasson for logistics and coordination of the health survey. Finally, the authors thank all the community participants for their interest and willingness to contribute to the study.

**NTR (Netherlands Twin Registry)** - Funding was obtained from the Netherlands Heart Foundation (90.313, 86.083 and 88.042); the Netherlands Organization for Scientific Research (NWO: MagW/ZonMW); Genetic basis of anxiety and depression (904-61-090); Genetics of individual differences in smoking initiation and persistence (NWO 985-10-002); Resolving cause and effect in the association between exercise and well-being (904-61-193); Twin family database for behavior genomics studies (480-04-004); Twin research focusing on behavior (400-05-717); Genetic determinants of risk behavior in relation to alcohol use and alcohol use disorder (Addiction-31160008); Genotype/phenotype database for behavior genetic and genetic epidemiological studies (911-09-032); Spinozapremie (SPI 56-464-14192); CMSB: Center for Medical Systems Biology (NWO Genomics); NBIC/BioAssist/RK/2008.024); BBMRI -NL: Biobanking and Biomolecular Resources Research Infrastructure; the VU University: Institute for Health and Care Research (EMGO+); Neuroscience Campus Amsterdam (NCA); the European Science Foundation (ESF): Genomewide analyses of European twin and population cohorts (EU/QLRT-2001-01254); European Community's Seventh Framework Program (FP7/2007-2013): ENGAGE (HEALTH-F4-2007-201413); the European Science Council (ERC) Genetics of Mental Illness (230374); Rutgers University Cell and DNA Repository cooperative agreement (NIMH U24 MH068457-06); Collaborative study of the genetics of DZ twinning (NIH R01D0042157-01A); and the Genetic Association Information Network, a public-private partnership between the NIH and Pfizer Inc., Affymetrix Inc. and Abbott Laboratories.

**ORCADES, CHARGE (Orkney Complex Disease Study)** - ORCADES was supported by the Chief Scientist Office of the Scottish Government; the Royal Society; the Medical Research Council (MRC) Human Genetics Unit and the European Union framework program 6 EUROSPAN project (contract no. LSHG-CT-2006-018947). DNA extractions were performed at the Wellcome Trust Clinical Research Facility in Edinburgh. We would like to acknowledge the invaluable contributions of Lorraine Anderson and the research nurses in Orkney, the administrative team in Edinburgh and the people of Orkney.

**PIVUS (Prospective Investigation of the Vasculature in Uppsala Seniors)** - Genotyping was performed by the SNP&SEQ Technology Platform in Uppsala ([www.genotyping.se](http://www.genotyping.se)). We thank Tomas Axelsson, Ann-Christine Wiman and Caisa Pöntinen for their excellent assistance with genotyping. The SNP Technology Platform is supported by Uppsala University, Uppsala University Hospital and the Swedish Research Council for Infrastructures. Erik Ingelsson and Ci Song are supported by grants from the Swedish Research Council; the Swedish Heart-Lung Foundation; the Swedish Foundation for Strategic Research; and the Royal Swedish Academy of Science.

**PREVEND (Prevention of Renal and Vascular End-stage Disease)** - PREVEND genetics is supported by the Dutch Kidney Foundation (Grant E033); the EU project grant GENECURE (FP-6 LSHM CT 2006 037697); the National Institutes of Health (grant LM010098); The Netherlands organization for health research and development (NWO VENI grant 916.761.70); and the Dutch Inter University Cardiology Institute Netherlands (ICIN).

**RISC (Relationship between Insulin Sensitivity and Cardiovascular Disease Study)** - The RISC Study was supported by European Union grant QLG1-CT-2001-01252; AstraZeneca; and Merck and Co, Inc. Weijia Xie was funded by a Diabetes UK Arthur and Sadie Pethybridge Studentship.

**RRgen consortium** - Acknowledgments of the studies included in the RRgen consortium (AGES, ARIC, CHS, FHS, KORA, MICROS, ORCADES, RS1-2, SardiNIA, SHIP and Twins UK) are provided for each study separately.

**RS1-3 (Rotterdam Study I - III)** - The generation and management of GWAS genotype data for the Rotterdam Study is supported by the Netherlands Organisation of Scientific Research NWO Investments [grant 175.010.2005.011, 911-03-012]. This study is funded by the Research Institute for Diseases in the Elderly [014-93-015, RIDE2]; and the Netherlands Genomics Initiative (NGI)/Netherlands Organisation for

Scientific Research (NWO) [050-060-810]. The Rotterdam Study is funded by Erasmus Medical Center and Erasmus University, Rotterdam; Netherlands Organization for the Health Research and Development (ZonMw); the Research Institute for Diseases in the Elderly (RIDE); the Ministry of Education, Culture and Science; the Ministry for Health, Welfare and Sports; the European Commission (DG XII), and the Municipality of Rotterdam. The Rotterdam Study used resources from the National German MediGRID and Services@MediGRID part of the German D-Grid, both funded by the German Bundesministerium für Forschung und Technologie [grant #01 AK 803 A-H, # 01 IG 07015]. This work was also supported by the Netherlands Heart Foundation (NHF) [2007B221 and 2009R014 to Mark Eijgelsheim].

**SardiNIA** - The SardiNIA team was supported by the National Institute on Aging [contract NO1-AG-1-2109] from and in part by the Intramural Research Program of the National Institutes of Health, National Institute on Aging. We would like to thank the Sardinian volunteers who generously supported the SardiNIA study and made it possible. We also acknowledge the support of the administration of Lanusei, Ilbono, Arzana and Elini (Sardinia, Italy).

**SHIP (Study of Health in Pomerania)** - SHIP is part of the Community Medicine Research net of the University of Greifswald, Germany, which is funded by the Federal Ministry of Education and Research [grants 01ZZ9603, 01ZZ0103 and 01ZZ0403], the Ministry of Cultural Affairs as well as the Social Ministry of the Federal State of Mecklenburg - West Pomerania. Generation of genome-wide data has been supported by the Federal Ministry of Education and Research [grant 03ZIK012] and a joint grant from Siemens Healthcare, Erlangen, Germany and the Federal State of Mecklenburg-West Pomerania. The University of Greifswald is a member of the 'Center of Knowledge Interchange' program of the Siemens AG.

**Split (CROATIA-Split)** - The SPLIT study is funded by grants from the Medical Research Council (UK); and Republic of Croatia Ministry of Science, Education and Sports research grants to Igor Rudan (108-1080315-0302). We would like to acknowledge the staff of several institutions in Croatia that supported the field work, including but not limited to The University of Split and Zagreb Medical Schools and Croatian Institute for Public Health. The SNP genotyping for the SPLIT cohort was performed by AROS Applied Biotechnology, Aarhus, Denmark.

**Stanford IST cohort (Stanford Study)** - The genotyping for the STANFORD IST study was supported by a grant from Merck & Co. Inc. Weijia Xie was funded by a Diabetes UK Arthur and Sadie Pethybridge Studentship.

**STR (Swedish Twin Registry)** - This work was supported by grants from the US National Institutes of Health (AG028555, AG08724, AG04563, AG10175 and AG08861); the Swedish Research Council; the Swedish Heart-Lung Foundation; the Swedish Foundation for Strategic Research; the Royal Swedish Academy of Science; and ENGAGE (within the European Union Seventh Framework Programme, HEALTH-F4-2007-201413). Genotyping was performed by the SNP&SEQ Technology Platform in Uppsala ([www.genotyping.se](http://www.genotyping.se)). We thank Tomas Axelsson, Ann-Christine Wiman and Caisa Pöntinen for their excellent assistance with genotyping. The SNP Technology Platform is supported by Uppsala University; Uppsala University Hospital; and the Swedish Research Council for Infrastructures.

**Twins UK, CHARGE (Twins UK Study)** - Twins UK was funded by the Wellcome Trust; European Community's Seventh Framework Programme (FP7/2007-2013) [grant HEALTH-F2-2008-201865-GEFOS] and (FP7/2007-2013) [ENGAGE grant HEALTH-F4-2007-201413] and the FP-5 GenomEUtwin Project (QLG2-CT-2002-01254). The study also receives support from the Dept. of Health via the National Institute for Health Research (NIHR) comprehensive Biomedical Research Centre award to Guy's & St Thomas' NHS Foundation Trust in partnership with King's College London. The project also received support from a Biotechnology and Biological Sciences Research Council (BBSRC) project [grant G20234]. Analyses were performed on the Genetic Cluster



Computer, which is financed by an NWO Medium Investment [grant 480-05-003] and by the Faculty of Psychology and Education of the VU University, Amsterdam, The Netherlands.

**ULSAM (Uppsala Longitudinal Study of Adult Men)** - Genotyping was performed by the SNP&SEQ Technology Platform in Uppsala ([www.genotyping.se](http://www.genotyping.se)). We thank Tomas Axelsson, Ann-Christine Wiman and Caisa Pöntinen for their excellent assistance with genotyping. The SNP Technology Platform is supported by Uppsala University; Uppsala University Hospital; and the Swedish Research Council for Infrastructures. Erik Ingelsson and Ci Song are supported by grants from the Swedish Research Council; the Swedish Heart-Lung Foundation; the Swedish Foundation for Strategic Research; and the Royal Swedish Academy of Science.

**Whitehall II (Whitehall II Study)** - The work on Whitehall II was supported by the BHF (PG/07/133/24260, RG/08/008, SP/07/007/23671); and a Senior Fellowship to Professor Hingorani (FS/2005/125). Meena Kumari's and Mika Kivimaki's time on this manuscript was partially supported by the National Heart Lung and Blood Institute (NHLBI: HL36310). The Whitehall II study has been supported by grants from the Medical Research Council; British Heart Foundation; Health and Safety Executive; Department of Health; National Institute on Aging (AG13196); US, NIH; Agency for Health Care Policy Research (HS06516); and the John D and Catherine T MacArthur Foundation Research Networks on Successful Midlife Development and Socio-economic Status and Health.

**YFS (Young Finns Study)** - The Young Finns Study has been financially supported by the Academy of Finland: grants 126925, 121584, 124282, 129378, 117787 and 41071; The Social Insurance Institution of Finland; Kuopio, Tampere and Turku University Hospital Medical Funds; Juho Vainio Foundation; Paavo Nurmi Foundation; Finnish Foundation of Cardiovascular Research and Finnish Cultural Foundation; Tampere Tuberculosis Foundation; and Emil Aaltonen Foundation. The expert technical assistance in data management and statistical analyses by Irina Lisinen and Ville Aalto are gratefully acknowledged.

***Drosophila melanogaster* experiments** - Bianca Brundel received funding from the European Community; European Fund for Regional Development (Operationeel Programma Noord-Nederland 2007-2012, OP-EFRO); the Province of Groningen; and the Innovative Action-program Groningen (IAG3). Ody Sibon received a VICI Grant from the NOW (865.10.012).

***Danio rerio* experiments** - The zebrafish experiments were financed using NIH grants awarded to David Milan (HL109004, DA026982) and Jodan T Shin (HL085280).

## 2.3 Members of contributing consortia

### Global BPgen consortium

Contributed data for associations of the heart rate loci with systolic and diastolic blood pressure and hypertension

**Authors:** C Newton-Cheh, T Johnson, V Gateva, MD Tobin, M Bochud, L Coin, SS Najjar, JH Zhao, SC Heath, S Eyheramendy, K Papadakis, BF Voight, LJ Scott, F Zhang, M Farrall, T Tanaka, C Wallace, JC Chambers, K-T Khaw, P Nilsson, P van der Harst, S Polidoro, DE Grobbee, NC Onland-Moret, ML Bots, LV Wain, KS Elliott, A Teumer, J Luan, G Lucas, J Kuusisto, PR Burton, D Hadley, WL McArdle, M Brown, A Dominiczak, SJ Newhouse, NJ Samani, J Webster, E Zeggini, JS Beckmann, S Bergmann, N Lim, K Song, P Vollenweider, G Waeber, DM Waterworth, X Yuan, L Groop, M Orho-Melander, A Allione, A Di Gregorio, S Guarrera, S Panico, F Ricceri, V Romanazzi, C Sacerdote, P Vineis, I Barroso, MS Sandhu, RN Luben, GJ Crawford, P Jousilahti, M Perola, M Boehnke, LL Bonnycastle, FS Collins, AU Jackson, KL Mohlke, HM Stringham, TT Valle, CJ Willer, RN Bergman, MA Morken, A Döring, C Gieger, T Illig, T Meitinger, E Org, A Pfeufer, HE Wichmann, S Kathiresan, J Marrugat, CJ O'Donnell, SM Schwartz, DS Siscovick, I Subirana, NB Freimer, A-L Hartikainen, MI McCarthy, PF O'Reilly, L Peltonen, A Pouta, PE de Jong, H Snieder, WH van Gilst, R Clarke, A Goel, A Hamsten, JF Peden, U Seedorf, A-C Syvänen, G Tognoni, EG Lakatta, S Sanna, P Scheet, D Schlessinger, A Scuteri, M Dörr, F Ernst, SB Felix, G Homuth, R Lorbeer, T Reffelmann, R Rettig, U Völker, P Galan, IG Gut, S Hercberg, GM Lathrop, D Zeleneka, P Deloukas, N Soranzo, FM Williams, G Zhai, V Salomaa, M Laakso, R Elosua, NG Forouhi, H Völzke, CS Uiterwaal, YT van der Schouw, ME Numans, G Matullo, G Navis, G Berglund, SA Bingham, JS Kooner, AD Paterson, JM Connell, S Bandinelli, L Ferrucci, H Watkins, TD Spector, J Tuomilehto, D Altshuler, DP Strachan, M Laan, P Meneton, NJ Wareham, M Uda, M-R Jarvelin, V Mooser, O Melander, RJF Loos, P Elliott, GR Abecasis, M Caulfield and PB Munroe.

### CARDIoGRAM consortium

Contributed data for associations of the heart rate loci with coronary artery disease and myocardial infarction

**Authors:** H Schunkert, IR König, S Kathiresan, MP Reilly, TI Assimes, H Holm, M Preuss, AFR Stewart, M Barbalic, C Gieger, D Absher, Z Aherrahrou, H Allayee, D Altshuler, SS Anand, K Andersen, JI Anderson, D Ardissino, SG Ball, AJ Balmforth, TA Barnes, DM Becker, LC Becker, K Berger, JC Bis, SM Boekholdt, E Boerwinkle, PS Braund, MJ Brown, MS Burnett, I Buysschaert, JF Carlquist, L Chen, S Cichon, V Codd, RW Davies, G Dedoussis, A Dehghan, S Demissie, JM Devaney, P Diemert, R Do, A Doering, S Eifert, NE el Mokhtari, SG Ellis, R Elosua, JC Engert, SE Epstein, U de Faire, M Fischer, AR Folsom, J Freyer, B Gigante, D Girelli, S Gretarsdottir, V Gudnason, JR Gulcher, E Halperin, N Hammond, SI Hazen, A Hofman, BD Horne, T Illig, C Iribarren, GT Jones, JW Jukema, MA Kaiser, LM Kaplan, JJP Kastelein, K-T Khaw, J Knowles, G Kolovou, A Kong, R Laaksonen, D Lambrechts, K Leander, G Lettre, M Li, W Lieb, C Loley, AJ Lotery, PM Mannucci, S Maouche, N Martinelli, PP McKeown, C Meisinger, T Meitinger, O Melander, PA Merlini, V Mooser, T Morgan, TW Mühleisen, JB Muhlestein, T Münzel, K Musunuru, J Nahrstaedt, CP Nelson, MM Nöthen, O Olivieri, RS Patel, CC Patterson, A Peters, F Peyvandi, L Qu, AA Quyyumi, DJ Rader, LS Rallidis, C Rice, FR Rosendaal, D Rubin, V Salomaa, ML Sampietro, MS Sandhu, E Schadt, A Schäfer, A Schillert, S Schreiber, J Schrezenmeir, SM Schwartz, DS Siscovick, M Sivananthan, S Sivapalaratnam, AV Smith, TB Smith, JD Snoep, N Soranzo, JA Spertus, K Stark, K Stirrups, M Stoll, WH Tang, S Tennstedt, G Thorgeirsson, G Thorleifsson, M Tomaszewski, AG Uitterlinden, AM van Rij, BF Voight, NJ Wareham, GA Wells, HE Wichmann, PS Wild, C Willenborg, JCM Witteman, BJ Wright, S Ye, T Zeller, A Ziegler, F Cambien, AH Goodall, IA Cupples, T Quertermous, W März, C Hengstenberg, S Blankenberg, WH Ouwehand, AS Hall, P Deloukas, JR Thompson, K Stefansson, R Roberts, U Thorsteinsdottir, CJ O'Donnell, R McPherson, J Erdmann and NJ Samani.

### **PR GWAS consortium**

Contributed data for associations of the heart rate loci with PR duration

**Authors:** A Pfeufer, C van Noord, KD Marciante, DE Arking, MG Larson, AV Smith, KV Tarasov, M Müller, N Sotoodehnia, MF Sinner, GC Verwoert, M Li, WH Kao, A Köttgen, J Coresh, JC Bis, BM Psaty, K Rice, JJ Rotter, F Rivadeneira, A Hofman, JA Kors, BH Stricker, AG Uitterlinden, CM van Duijn, BM Beckmann, W Sauter, C Gieger, SA Lubitz, C Newton-Cheh, TJ Wang, JW Magnani, RB Schnabel, MK Chung, J Barnard, JD Smith, DR Van Wagoner, RS Vasan, T Aspelund, G Eiriksdottir, TB Harris, LJ Launer, SS Najjar, E Lakatta, D Schlessinger, M Uda, GR Abecasis, B Müller-Myhsok, GB Ehret, E Boerwinkle, A Chakravarti, EZ Soliman, KL Lunetta, S Perz, HE Wichmann, T Meitinger, D Levy, V Gudnason, PT Ellinor, S Sanna, S Käab, JCM Witteman, A Alonso, EJ Benjamin and SR Heckbert.

### **QRS GWAS consortium**

Contributed data for associations of the heart rate loci with QRS duration

**Authors:** N Sotoodehnia, A Isaacs, PI de Bakker, M Dörr, C Newton-Cheh, IM Nolte, P van der Harst, M Müller, M Eijgelsheim, A Alonso, AA Hicks, S Padmanabhan, C Hayward, AV Smith, O Polasek, S Giovannone, J Fu, JW Magnani, KC Marciante, A Pfeufer, SA Gharib, A Teumer, M Li, JC Bis, F Rivadeneira, T Aspelund, A Köttgen, T Johnson, K Rice, MP Sie, YA Wang, N Klopp, C Fuchsberger, SH Wild, I Mateo Leach, K Estrada, U Völker, AF Wright, FW Asselbergs, J Qu, A Chakravarti, MF Sinner, JA Kors, A Petersmann, TB Harris, EZ Soliman, PB Munroe, BM Psaty, BA Oostra, LA Cupples, S Perz, RA de Boer, AG Uitterlinden, H Völzke, TD Spector, FY Liu, E Boerwinkle, AF Dominiczak, JI Rotter, G van Herpen, D Levy, HE Wichmann, WH van Gilst, JCM Witteman, HK Kroemer, WH Kao, SR Heckbert, T Meitinger, A Hofman, H Campbell, AR Folsom, DJ van Veldhuisen, C Schwenk, CJ O'Donnell, CB Volpato, MJ Caulfield, JM Connell, L Launer, X Lu, L Franke, RS Fehrmann, G te Meerman, HJ Groen, RK Weersma, LH van den Berg, C Wijmenga, RA Ophoff, G Navis, I Rudan, H Snieder, JF Wilson, PP Pramstaller, DS Siscovick, TJ Wang, V Gudnason, CM van Duijn, SB Felix, GI Fishman, Y Jamshidi, BH Stricker, NJ Samani, S Käab and DE Arking.

### **QT-IGC consortium**

Contributed data for associations of the heart rate loci with QT duration

**Authors:** DE Arking, S Pulit, L Crotti, PB Munroe, TT Koopmann, N Sotoodehnia, EJ Rossin, AD Johnson, A Lundby, DF Gudbjartsson, P van der Harst, PA Noseworthy, M Eijgelsheim, Y Bradford, KV Tarasov, M Dörr, M Mueller-Nurasyid, AM Lahtinen, IM Nolte, AV Smith, J Bis, A Isaacs, SJ Newhouse, DS Evans, WS Post, D Waggot, L-P Lyytikäinen, AA Hicks, L Eisele, D Ellinghaus, C Hayward, P Navarro, S Ulivi, T Tanaka, DJ Tester, S Chatel, S Gustafsson, M Kumari, RW Morris, ÅT Naluai, S Padmanabhan, A Kluttig, B Strohmer, AG Panayiotou, M Torres, M Knoflach, JA Hubacek, TB Harris, LJ Launer, A Shuldiner, A Alonso, JS Bader, G Ehret, H Huang, WH Linda Kao, JB Strait, PW MacFarlane, M Brown, MJ Caulfield, NJ Samani, J Willeit, JG Smith, KH Greiser, H Meyer zu Schwabedissen, K Werdan, M Carella, L Zelante, B Psaty, JI Rotter, I Kolcic, O Polašek, AF Wright, M Griffin, MJ Daly, DO Arnar, H Hólm, U Thorsteinsdottir, JC Denny, DM Roden, RL Zuvich, V Emilsson, AS Plump, MG Larson, CJ O'Donnell, X Yin, M Bobbo, AP D'Adamo, A Iorio, G Sinagra, A Carracedo, SR Cummings, MA Nalls, A Jula, K Kontula, AM Marjamaa, L Oikarinen, M Perola, K Porthan, R Erbel, P Hoffmann, K-H Jöckel, H Kälsch, M Nöthen, M den Hoed, RJF Loos, DS Thelle, C Gieger, T Meitinger, S Perz, A Peters, H Prucha, MF Sinner, M Waldenberger, RA de Boer, L Franke, BM Beckmann, E Martens, A Bardai, N Hofman, AAM Wilde, ER Behr, C Dalageorgou, JR Giudicessi, A Medeiros-Domingo, J Barc, F Kyndt, V Probst, A Ghidoni, R Insolia, RM Hamilton, SW Scherer, F Del Greco, C Fuchsberger, JR O'Connell, WK Lee, GCM Watt, H Campbell, SH Wild, NE El Mokhtari, N Frey, FW Asselbergs, I Mateo Leach, G Navis, MP van den Berg, DJ van Veldhuisen, BP Krijthe, OH Franco, A Hofman, JA Kors, AG Uitterlinden, JCM Witteman, L Kedenko, BA Oostra, GR Abecasis, EG Lakatta, M Orrú, D Schlessinger, M Uda, MRP Markus, U Völker, H Snieder, TD Spector, J Ärnlöv, L Lind, J Sundström, A-C Syvänen, M Kivimaki, M Kähönen, N Mononen, OT Raitakari, J Viikari, V

Adamkova, S Kiechl, M Brion, AN Nicolaides, B Paulweber, J Haerting, AF Dominiczak, F Nyberg, PH Whincup, A Hingorani, J-J Schott, CR Bezzina, E Ingelsson, L Ferrucci, P Gasparini, JF Wilson, I Rudan, A Franke, TW Mühleisen, PP Pramstaller, TJ Lehtimäki, AD Paterson, A Parsa, Y Liu, C van Duijn, DS Siscovick, V Gudnason, Y Jamshidi, V Salomaa, SB Felix, S Sanna, MD Ritchie, BH Stricker, K Stefansson, K Lage, JV Olsen, PJ Schwartz, S Kääh, A Chakravarti, MJ Ackerman, PIW de Bakker, A Pfeufer and C Newton-Cheh.

### **CHARGE-AF consortium**

Contributed data for associations of the heart rate loci with atrial fibrillation

**Authors:** PT Ellinor, KL Lunetta, CM Albert, NL Glazer, MD Ritchie, AV Smith, DE Arking, M Müller-Nurasyid, BP Krijthe, SA Lubitz, JC Bis, MK Chung, M Dörr, K Ozaki, JD Roberts, JG Smith, A Pfeufer, MF Sinner, K Lohman, J Ding, NL Smith, JD Smith, M Rienstra, KM Rice, DR Van Wagoner, JW Magnani, R Wakili, S Clauss, JI Rotter, G Steinbeck, LJ Launer, RW Davies, M Borkovich, TB Harris, H Lin, U Völker, H Völzke, DJ Milan, A Hofman, E Boerwinkle, LY Chen, EZ Soliman, BF Voight, G Li, A Chakravarti, M Kubo, U Tedrow, LM Rose, PM Ridker, D Conen, T Tsunoda, T Furukawa, N Sotoodehnia, S Xu, N Kamatani, D Levy, Y Nakamura, B Parvez, S Mahida, KL Furie, J Rosand, R Muhammad, BM Psaty, T Meitinger, S Perz, HE Wichmann, JCM Witteman, WH Linda Kao, S Kathiresan, DM Roden, AG Uitterlinden, F Rivadeneira, B McKnight, M Sjögren, AB Newman, Y Liu, MH Gollob, O Melander, T Tanaka, BHCh Stricker, SB Felix, A Alonso, D Darbar, J Barnard, DI Chasman, SR Heckbert, EJ Benjamin, **V Gudnason** and S Kääh.
